# Supplementary material for: Rhizoaspergillin A and Rhizoaspergillinol A, including a Unique Orsellinic Acid–Ribose–Pyridazinone-N-Oxide Hybrid, from the Mangrove Endophytic Fungus Aspergillus sp. A1E3
Source: MDPI journal article supplement (doi:10.3390/md21110598), 2023-11-19

# Supporting Information

## Table of Contents:

|                                                                                                            |         |
|------------------------------------------------------------------------------------------------------------|---------|
| 1. HR-ESIMS for <b>1</b> .....                                                                             | S3-S4   |
| 2. <sup>1</sup> H (400 MHz) NMR spectrum of <b>1</b> in DMSO- <i>d</i> <sub>6</sub> .....                  | S5-S8   |
| 3. <sup>13</sup> C (100 MHz) NMR spectrum of <b>1</b> in DMSO- <i>d</i> <sub>6</sub> .....                 | S9-S12  |
| 4. DEPT135 (100 MHz) spectrum of <b>1</b> in DMSO- <i>d</i> <sub>6</sub> .....                             | S13-S15 |
| 5. <sup>1</sup> H– <sup>1</sup> H COSY (400 MHz) spectrum of <b>1</b> in DMSO- <i>d</i> <sub>6</sub> ..... | S16-S18 |
| 6. HSQC (400 MHz) spectrum of <b>1</b> in DMSO- <i>d</i> <sub>6</sub> .....                                | S19-S21 |
| 7. HMBC (400 MHz) spectrum of <b>1</b> in DMSO- <i>d</i> <sub>6</sub> .....                                | S22-S25 |
| 8. NOESY (400 MHz) spectrum of <b>1</b> in DMSO- <i>d</i> <sub>6</sub> .....                               | S26-S27 |
| 9. HR-ESIMS for <b>2</b> .....                                                                             | S28-S29 |
| 10. <sup>1</sup> H (700 MHz) NMR spectrum of <b>2</b> in CDCl <sub>3</sub> .....                           | S30-S33 |
| 11. <sup>13</sup> C (175 MHz) NMR spectrum of <b>2</b> in CDCl <sub>3</sub> .....                          | S34-S38 |
| 12. DEPT135 (175 MHz) spectrum of <b>2</b> in CDCl <sub>3</sub> .....                                      | S39-S42 |
| 13. <sup>1</sup> H– <sup>1</sup> H COSY (700 MHz) spectrum of <b>2</b> in CDCl <sub>3</sub> .....          | S43-S44 |
| 14. HSQC (700 MHz) spectrum of <b>2</b> in CDCl <sub>3</sub> .....                                         | S45-S47 |
| 15. HMBC (700 MHz) spectrum of <b>2</b> in CDCl <sub>3</sub> .....                                         | S48-S50 |
| 16. NOESY (700 MHz) spectrum of <b>2</b> in CDCl <sub>3</sub> .....                                        | S51-S52 |
| 17. HR-ESIMS for <b>3</b> .....                                                                            | S53     |
| 18. <sup>1</sup> H (400 MHz) NMR spectrum of <b>3</b> in DMSO- <i>d</i> <sub>6</sub> .....                 | S54-S56 |
| 19. <sup>13</sup> C (100 MHz) NMR spectrum of <b>3</b> in DMSO- <i>d</i> <sub>6</sub> .....                | S57-S60 |

|                                                                                                                                               |          |
|-----------------------------------------------------------------------------------------------------------------------------------------------|----------|
| 20. DEPT135 (100 MHz) spectrum of <b>3</b> in DMSO- $d_6$ .....                                                                               | S61-S63  |
| 21. $^1\text{H}$ - $^1\text{H}$ COSY (400 MHz) spectrum of <b>3</b> in DMSO- $d_6$ .....                                                      | S64-S66  |
| 22. HSQC (400 MHz) spectrum of <b>3</b> in DMSO- $d_6$ .....                                                                                  | S67-S69  |
| 23. HMBC (400 MHz) spectrum of <b>3</b> in DMSO- $d_6$ .....                                                                                  | S70-S72  |
| 24. NOESY (400 MHz) spectrum of <b>3</b> in DMSO- $d_6$ .....                                                                                 | S73-S74  |
| 25. HR-ESIMS for <b>4</b> .....                                                                                                               | S75-S76  |
| 26. $^1\text{H}$ (700 MHz) NMR spectrum of <b>4</b> in $\text{CDCl}_3$ .....                                                                  | S77-S79  |
| 27. $^{13}\text{C}$ (175 MHz) NMR spectrum of <b>4</b> in $\text{CDCl}_3$ .....                                                               | S80-S84  |
| 28. DEPT135 (175 MHz) spectrum of <b>4</b> in $\text{CDCl}_3$ .....                                                                           | S85-S87  |
| 29. $^1\text{H}$ - $^1\text{H}$ COSY (700 MHz) spectrum of <b>4</b> in $\text{CDCl}_3$ .....                                                  | S88-S90  |
| 30. HSQC (700 MHz) spectrum of <b>4</b> in $\text{CDCl}_3$ .....                                                                              | S91-S93  |
| 31. HMBC (700 MHz) spectrum of <b>4</b> in $\text{CDCl}_3$ .....                                                                              | S94-S98  |
| 32. NOESY (700 MHz) spectrum of <b>4</b> in $\text{CDCl}_3$ .....                                                                             | S99-S103 |
| 33. Figure S1. Energy analyses of conformers (14 <i>S</i> ,15 <i>S</i> ,17 <i>R</i> )-2A to (14 <i>S</i> ,15 <i>S</i> ,17 <i>R</i> )-2J ..... | S104     |
| 34. Figure S2. Energy analyses of conformers (15 <i>R</i> ,19 <i>R</i> )-3A to (15 <i>R</i> ,19 <i>R</i> )-3E .....                           | S105     |
| 35. Figure S3. The UV spectrum of <b>1</b> .....                                                                                              | S106     |
| 36. Figure S4. The UV spectrum of <b>2</b> .....                                                                                              | S107     |
| 37. Figure S5. The UV spectrum of <b>3</b> .....                                                                                              | S108     |
| 38. Figure S6. The IR spectrum of <b>1</b> .....                                                                                              | S109     |
| 39. Figure S7. The IR spectrum of <b>2</b> .....                                                                                              | S110     |
| 40. Figure S8. The IR spectrum of <b>3</b> .....                                                                                              | S111     |

# HR-ESIMS for 1

## Mass Spectrum SmartFormula Report

### Analysis Info

Analysis Name D:\Data\MS\data\202110\wubinbin\_WBB-145-D\_pos\_52\_01\_11734.d  
 Method LC\_Direct Infusion\_pos\_70-500mz.m  
 Sample Name wubinbin\_WBB-145-D\_pos  
 Comment

Acquisition Date 10/27/2021 4:41:37 PM  
 Operator SCSIO  
 Instrument maXis 255552.00029

### Acquisition Parameter

|             |          |                      |          |                  |           |
|-------------|----------|----------------------|----------|------------------|-----------|
| Source Type | ESI      | Ion Polarity         | Positive | Set Nebulizer    | 0.4 Bar   |
| Focus       | Active   | Set Capillary        | 4500 V   | Set Dry Heater   | 180 °C    |
| Scan Begin  | 70 m/z   | Set End Plate Offset | -500 V   | Set Dry Gas      | 4.0 l/min |
| Scan End    | 1500 m/z | Set Charging Voltage | 0 V      | Set Divert Valve | Waste     |
|             |          | Set Corona           | 0 nA     | Set APCI Heater  | 0 °C      |

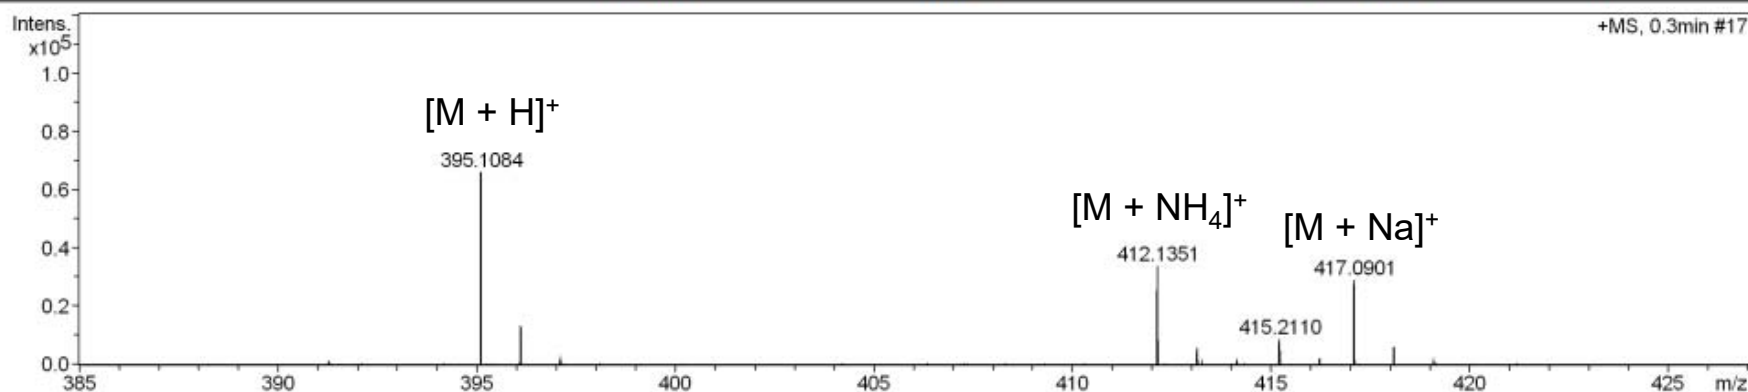

| Meas. m/z | # | Ion Formula  | Score  | m/z      | err [ppm] | err [mDa] | mSigma | rdB | e <sup>-</sup> Conf | N-Rule |
|-----------|---|--------------|--------|----------|-----------|-----------|--------|-----|---------------------|--------|
| 395.1084  | 1 | C17H19N2O9   | 100.00 | 395.1085 | -0.3      | -0.1      | 3.9    | 9.5 | even                | ok     |
| 417.0901  | 1 | C17H18N2NaO9 | 100.00 | 417.0905 | 0.8       | 0.4       | 6.1    | 9.5 | even                | ok     |

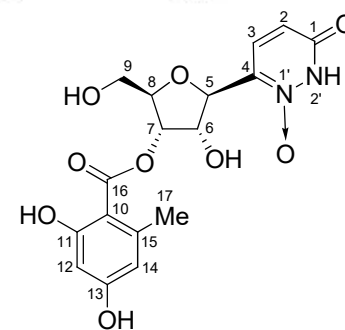

1

wubinbin\_WBB-145-D\_pos\_52\_01\_11734.d

Bruker Compass DataAnalysis 4.1

printed: 10/27/2021 4:47:14 PM

by: SCSIO

Page 1 of 1

S4

# HR-ESIMS for 1

## Generic Display Report

### Analysis Info

Analysis Name D:\Data\MS\data\202110\wubinbin\_WBB-145-D\_pos\_52\_01\_11734.d  
Method LC\_Direct Infusion\_pos\_70-500mz.m  
Sample Name wubinbin\_WBB-145-D\_pos  
Comment

Acquisition Date 10/27/2021 4:41:37 PM

Operator SCSIO

Instrument maXis

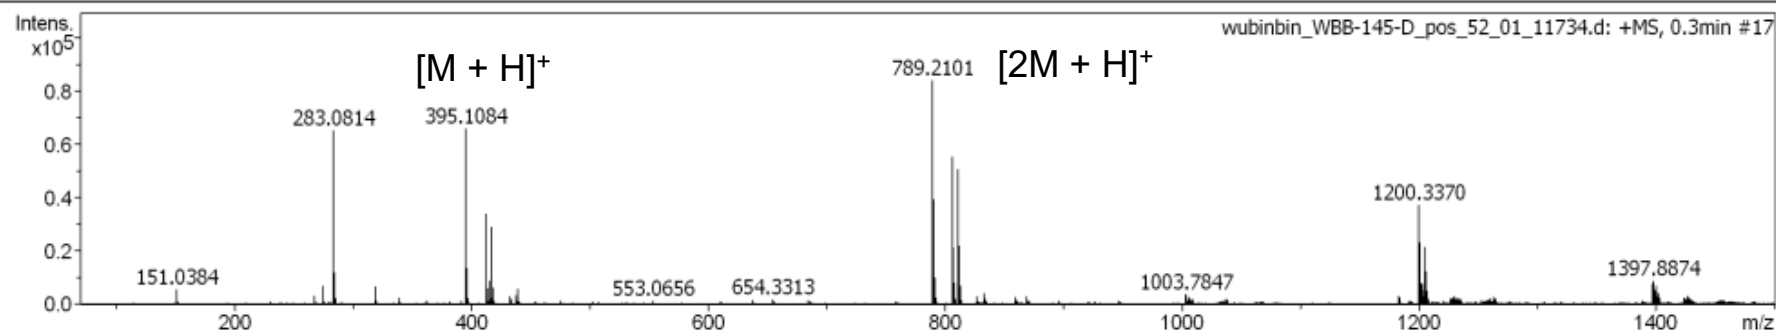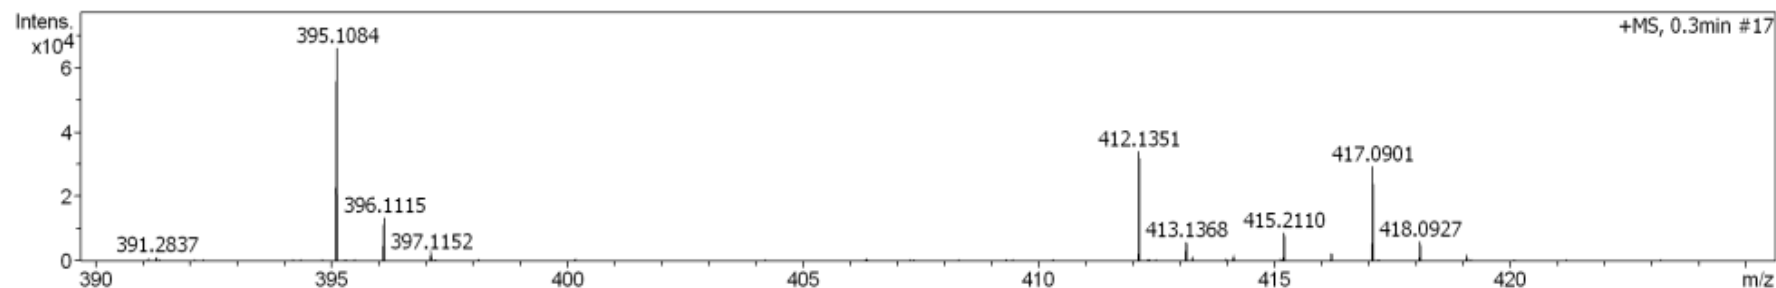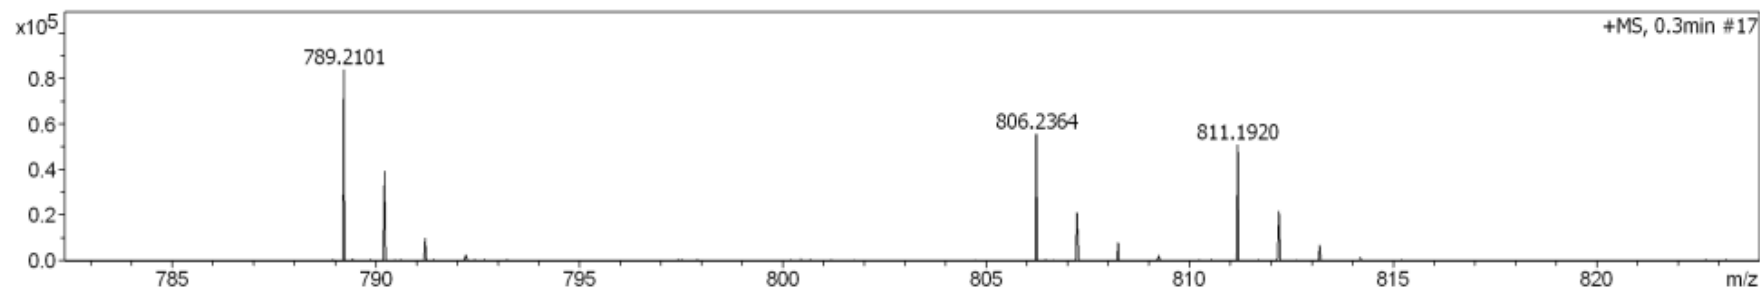

$^1\text{H}$  (400 MHz) NMR spectrum of **1** in  $\text{DMSO-}d_6$

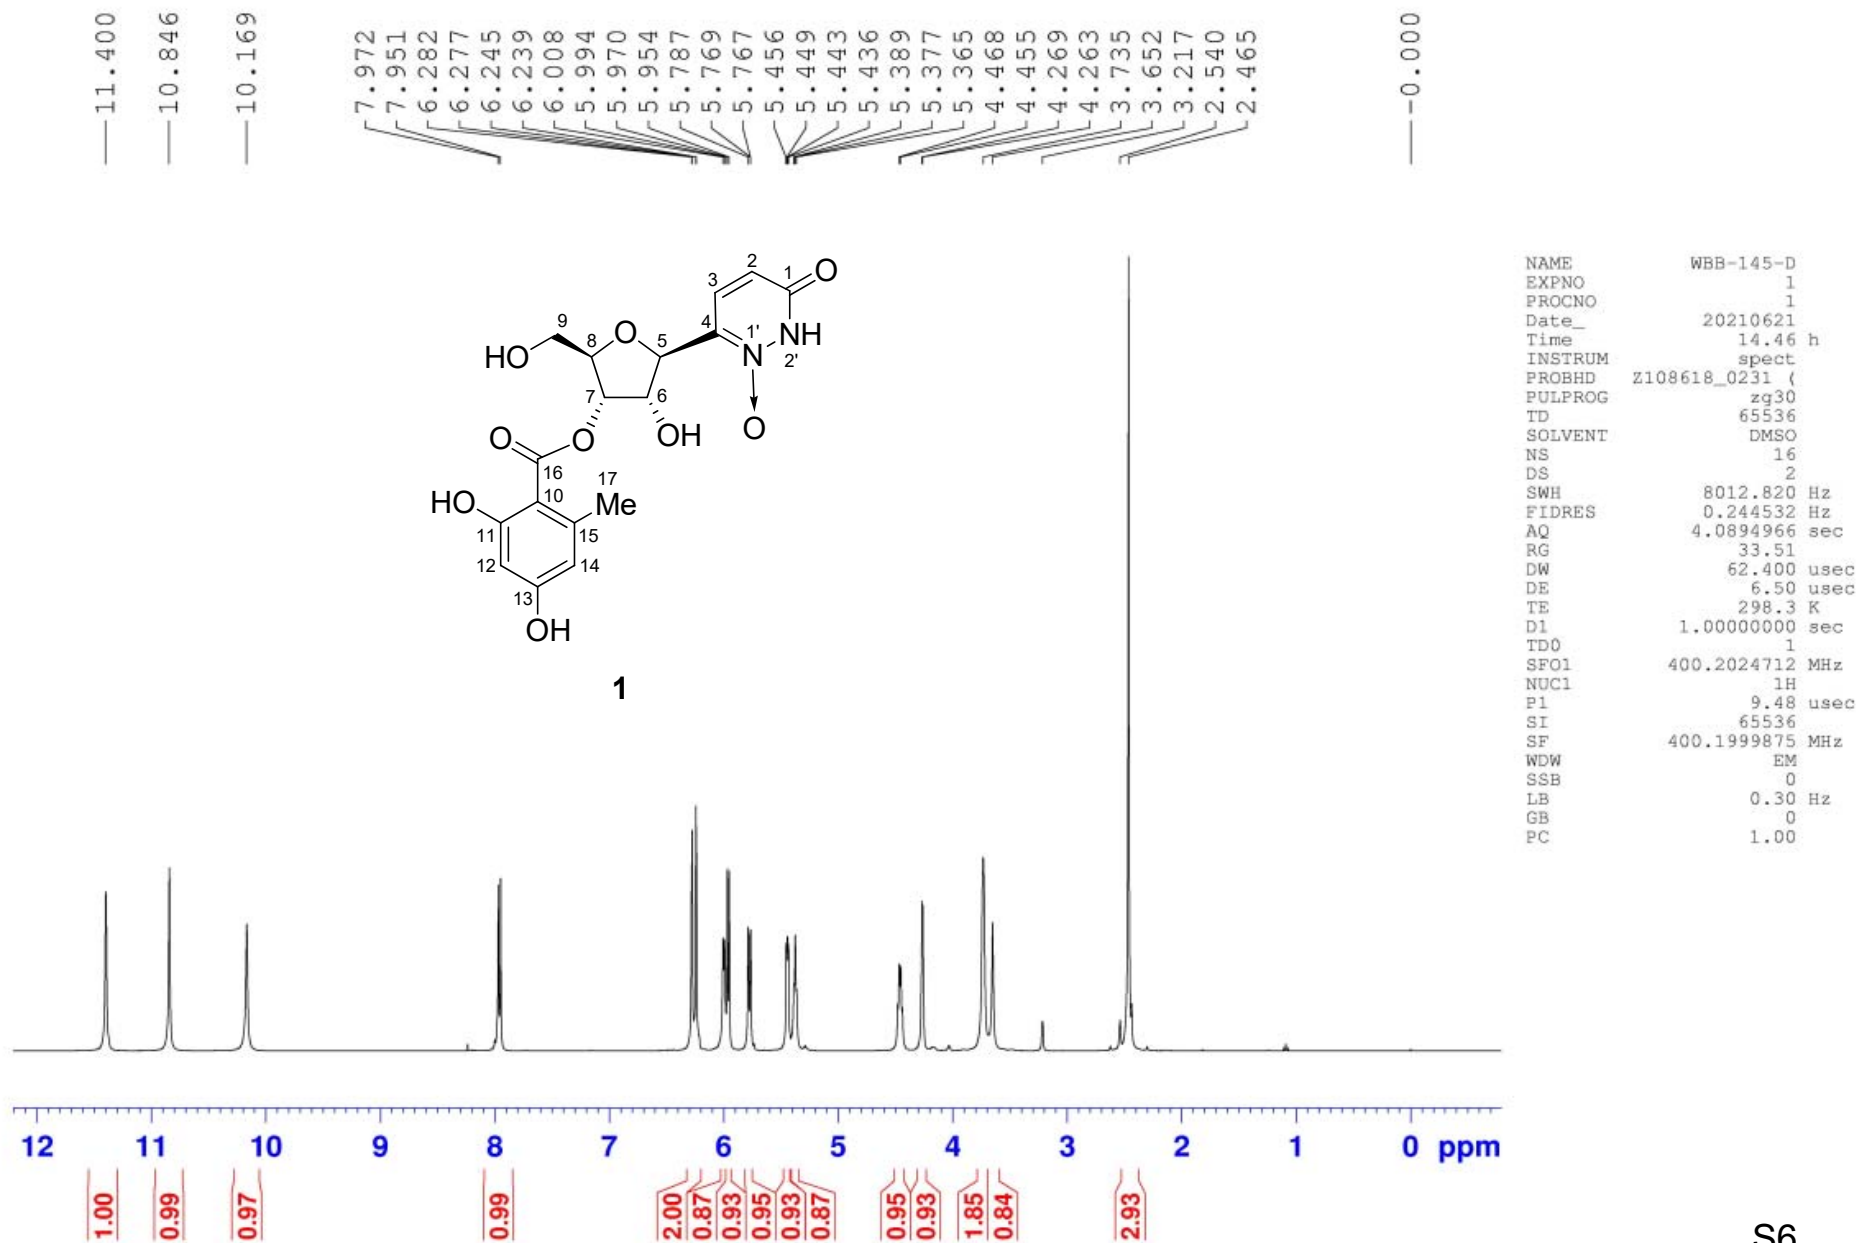

$^1\text{H}$  (400 MHz) NMR spectrum of **1** in  $\text{DMSO-}d_6$

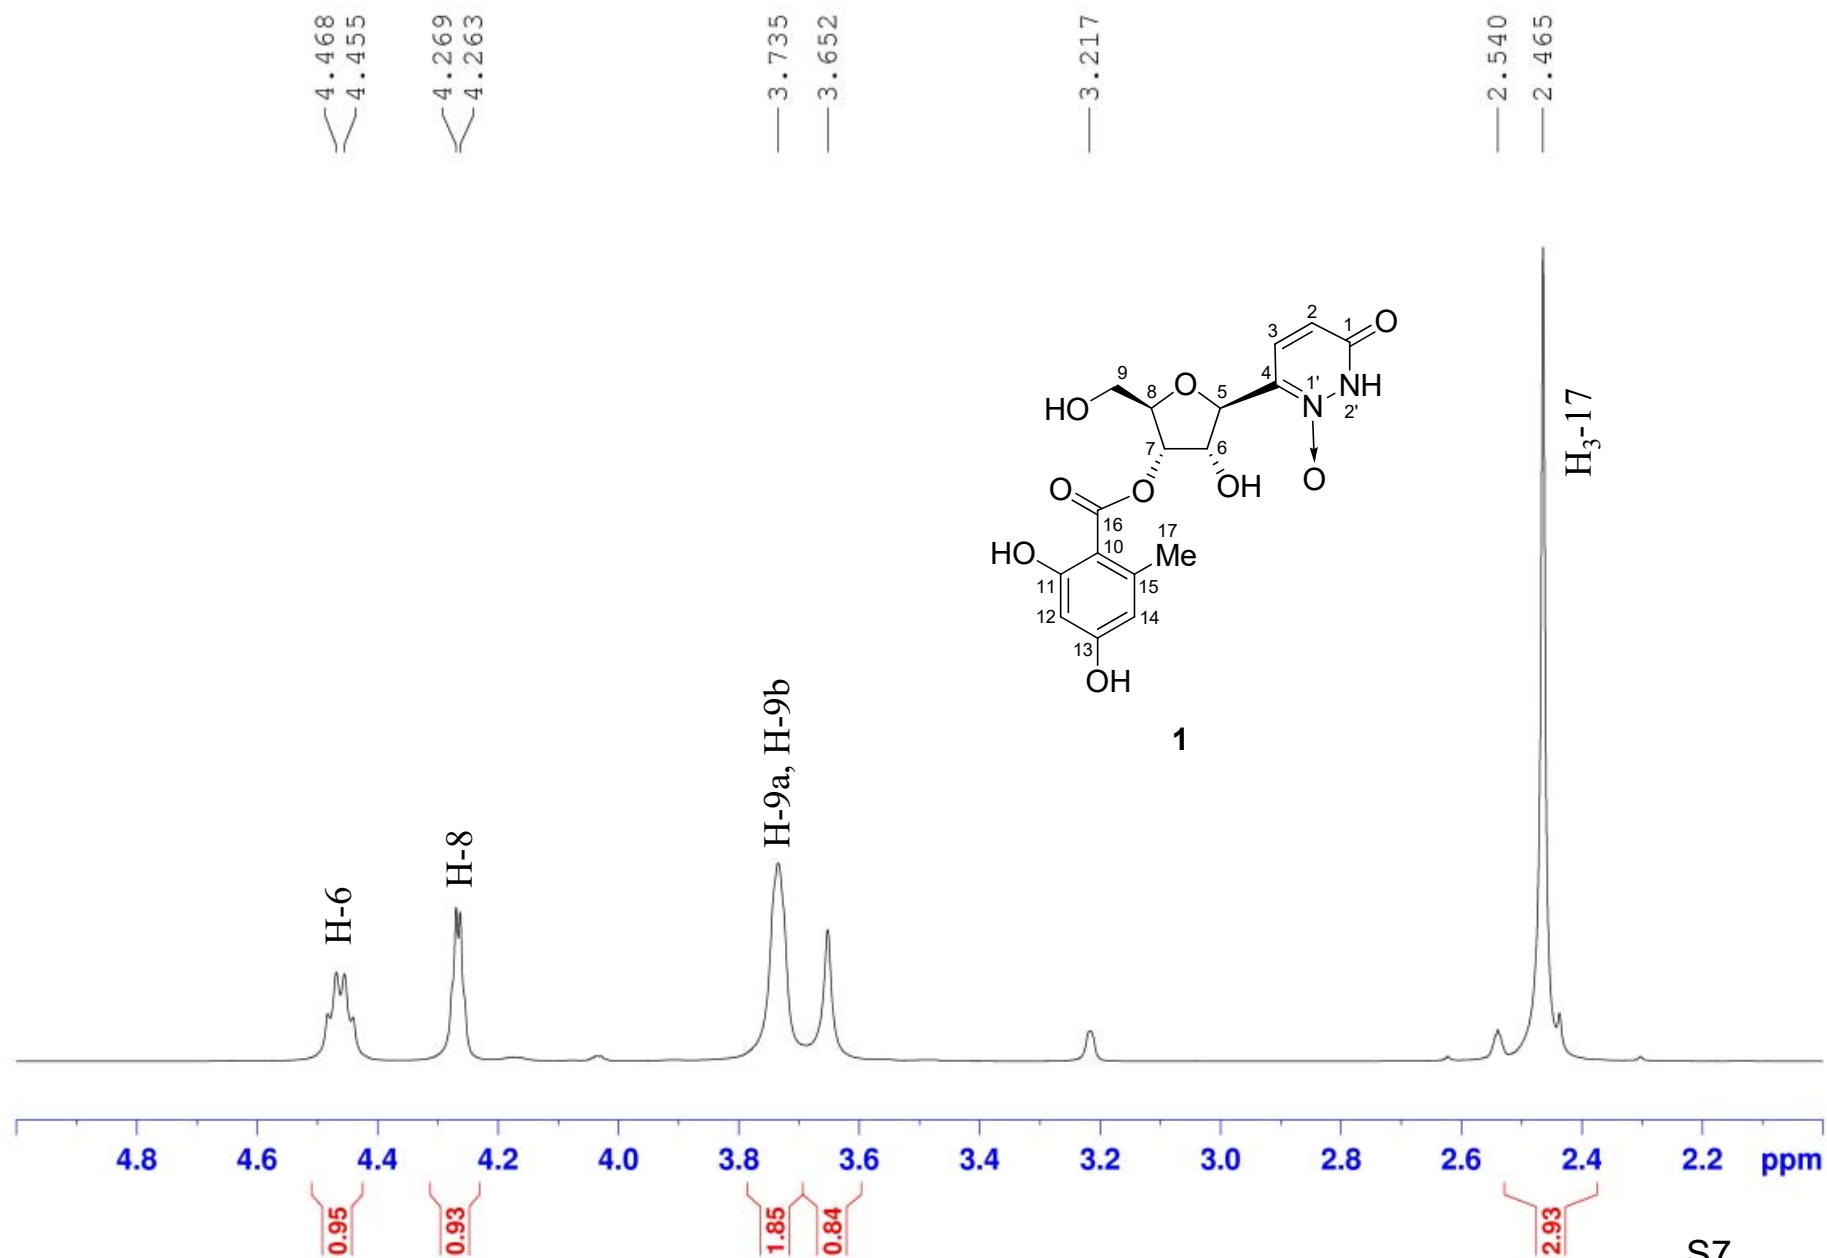

$^1\text{H}$  (400 MHz) NMR spectrum of **1** in  $\text{DMSO-}d_6$

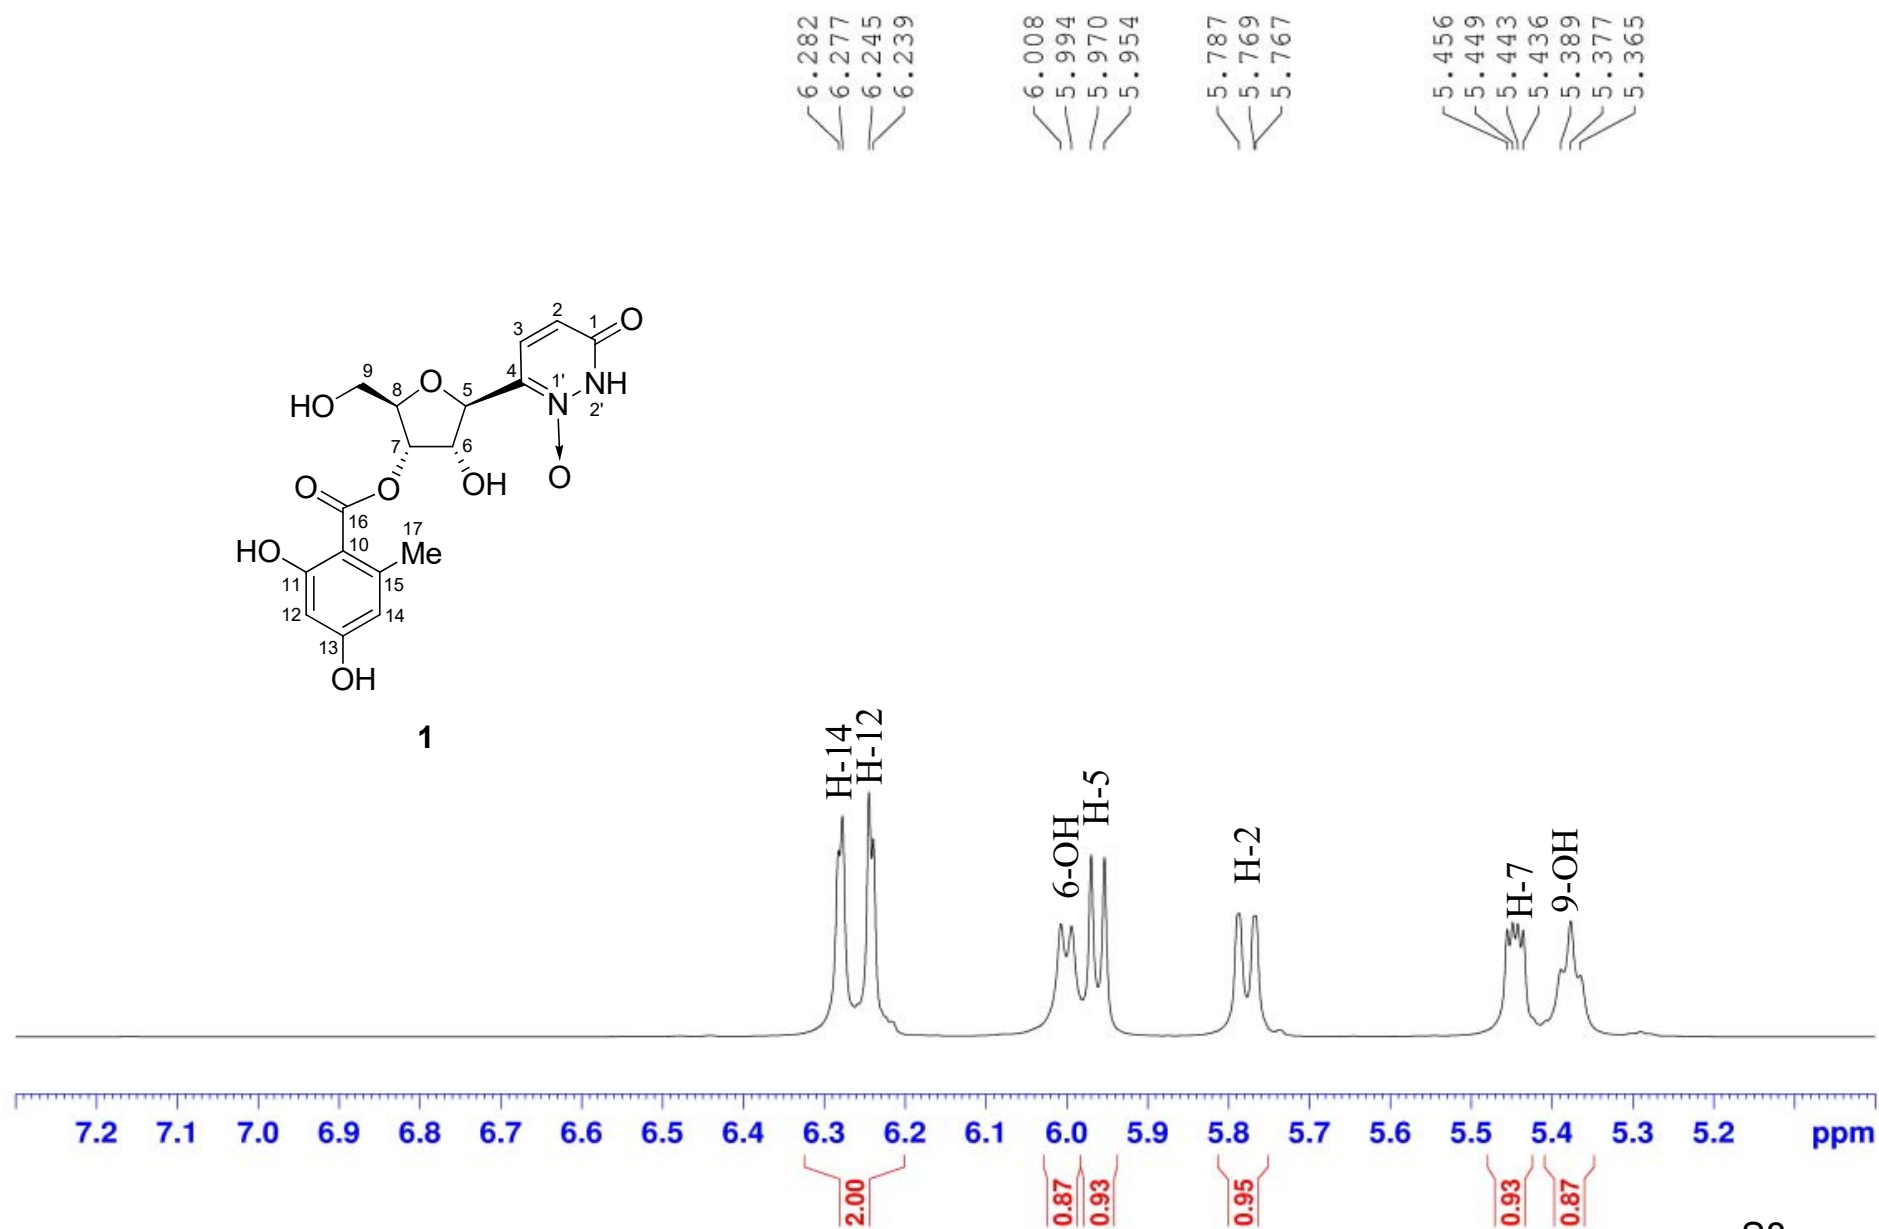

$^1\text{H}$  (400 MHz) NMR spectrum of **1** in  $\text{DMSO-}d_6$

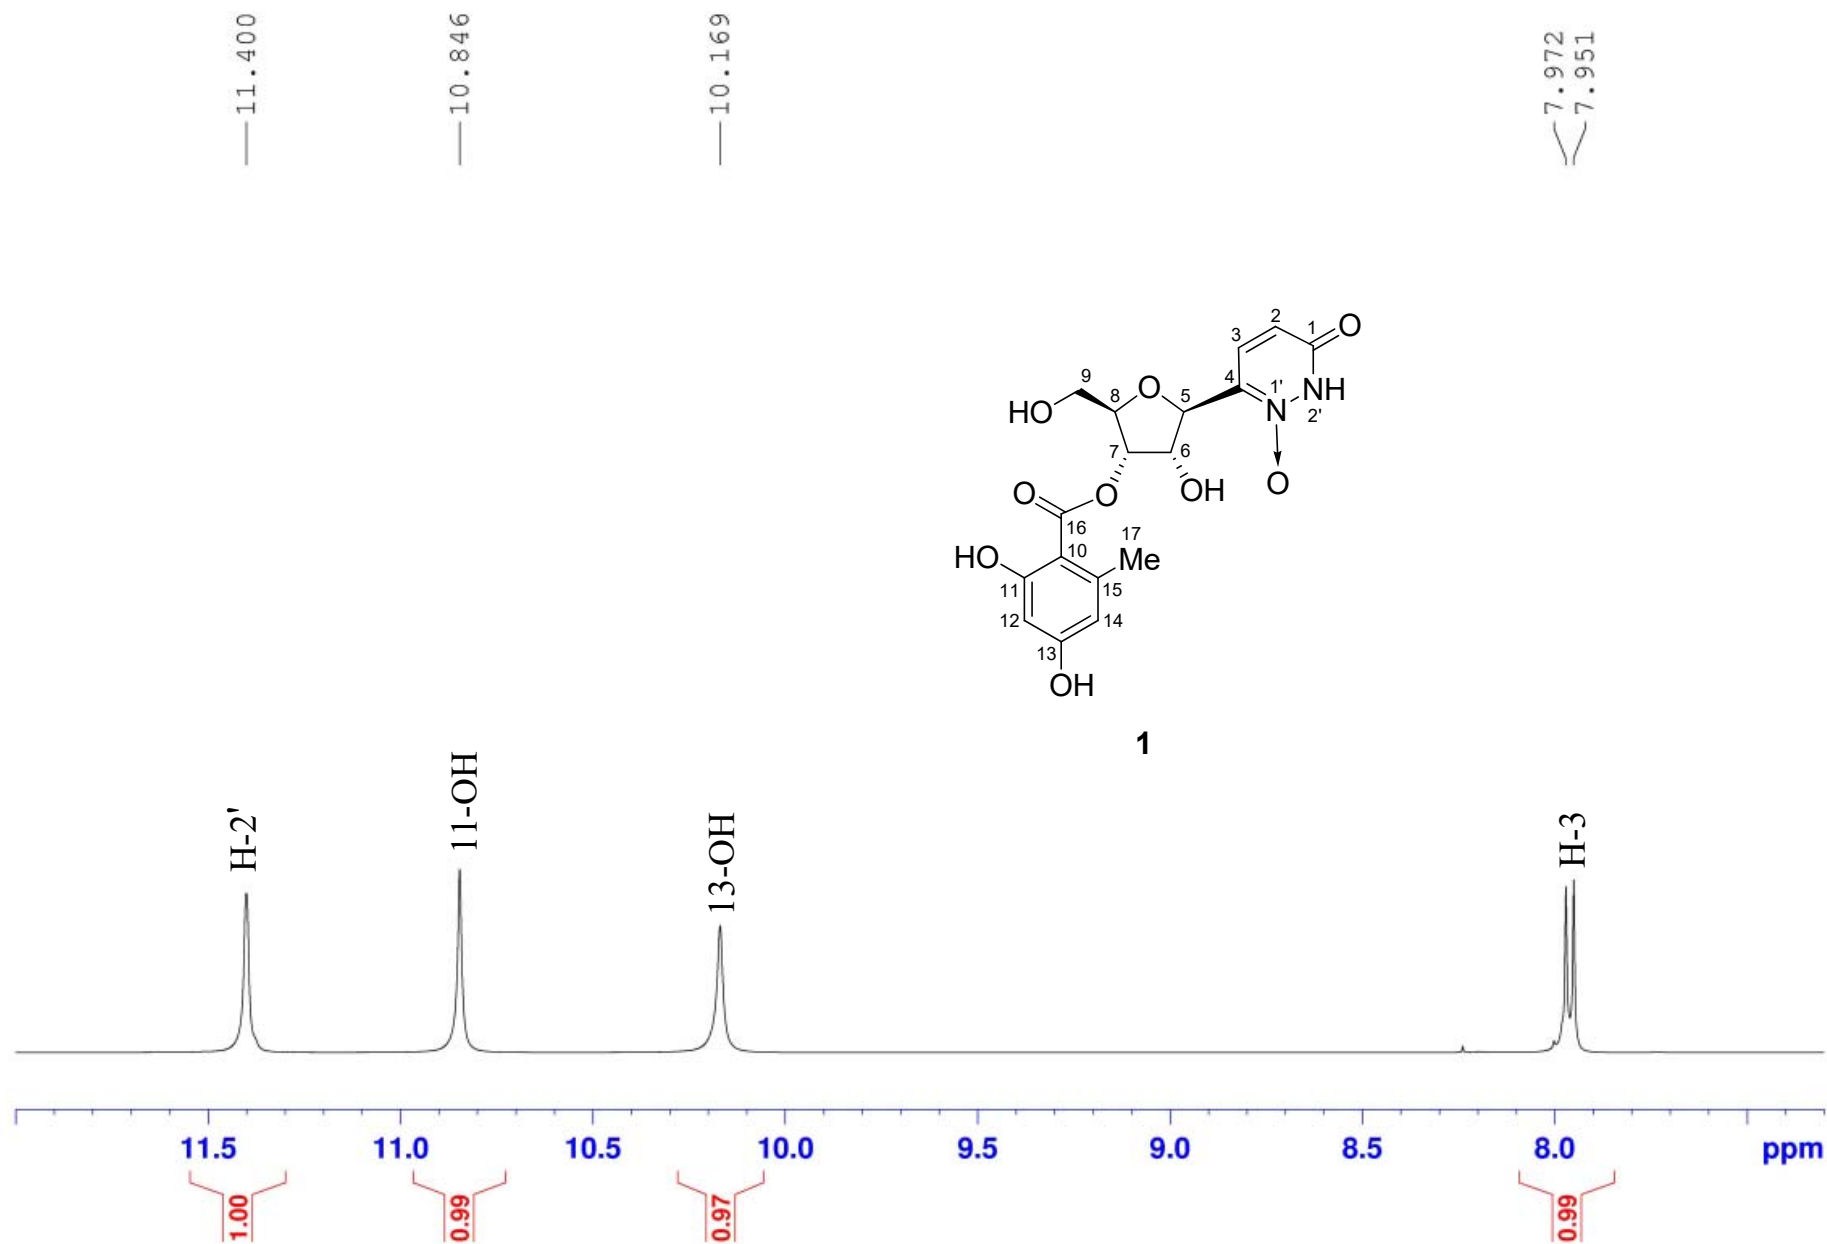



$^{13}\text{C}$  (100 MHz) NMR spectrum of **1** in  $\text{DMSO-}d_6$

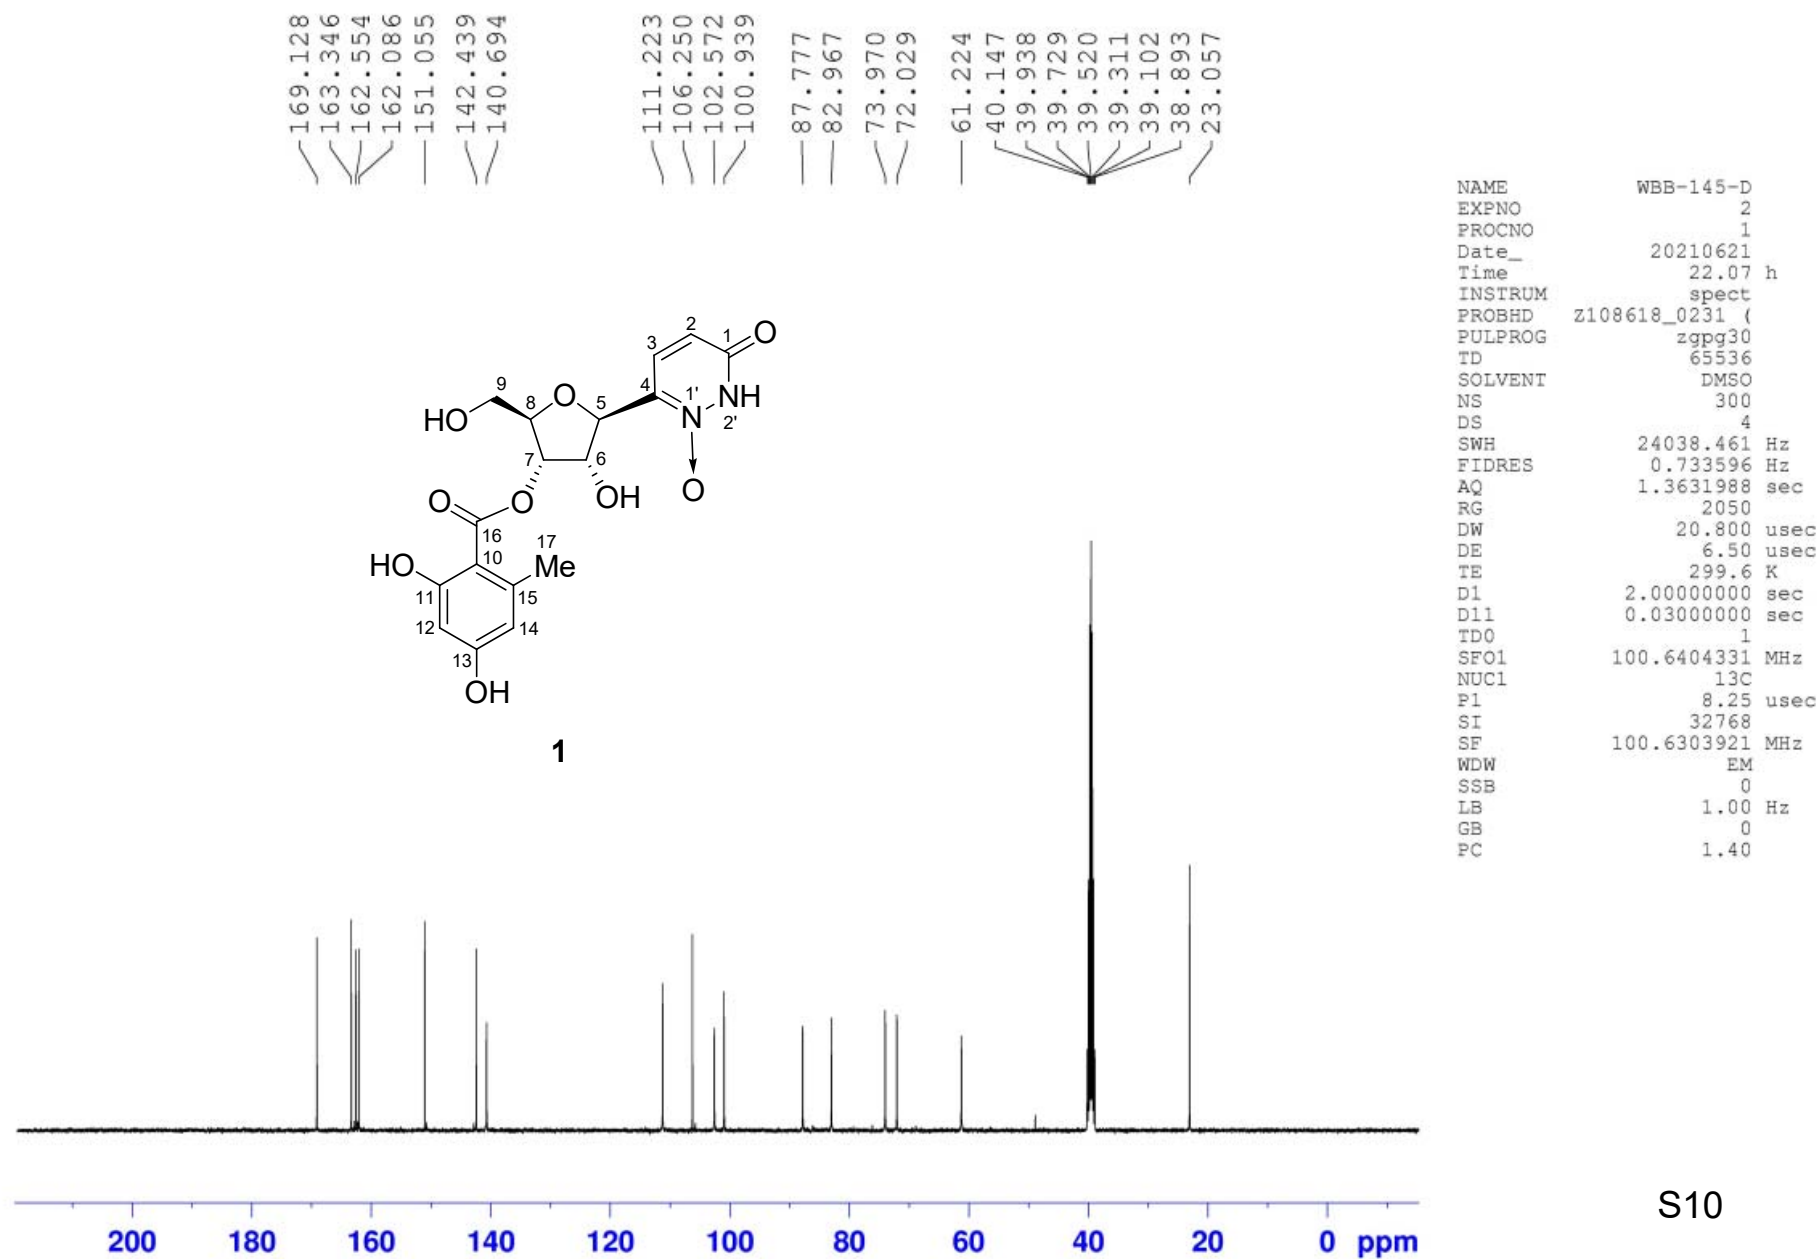

$^{13}\text{C}$  (100 MHz) NMR spectrum of **1** in  $\text{DMSO-}d_6$

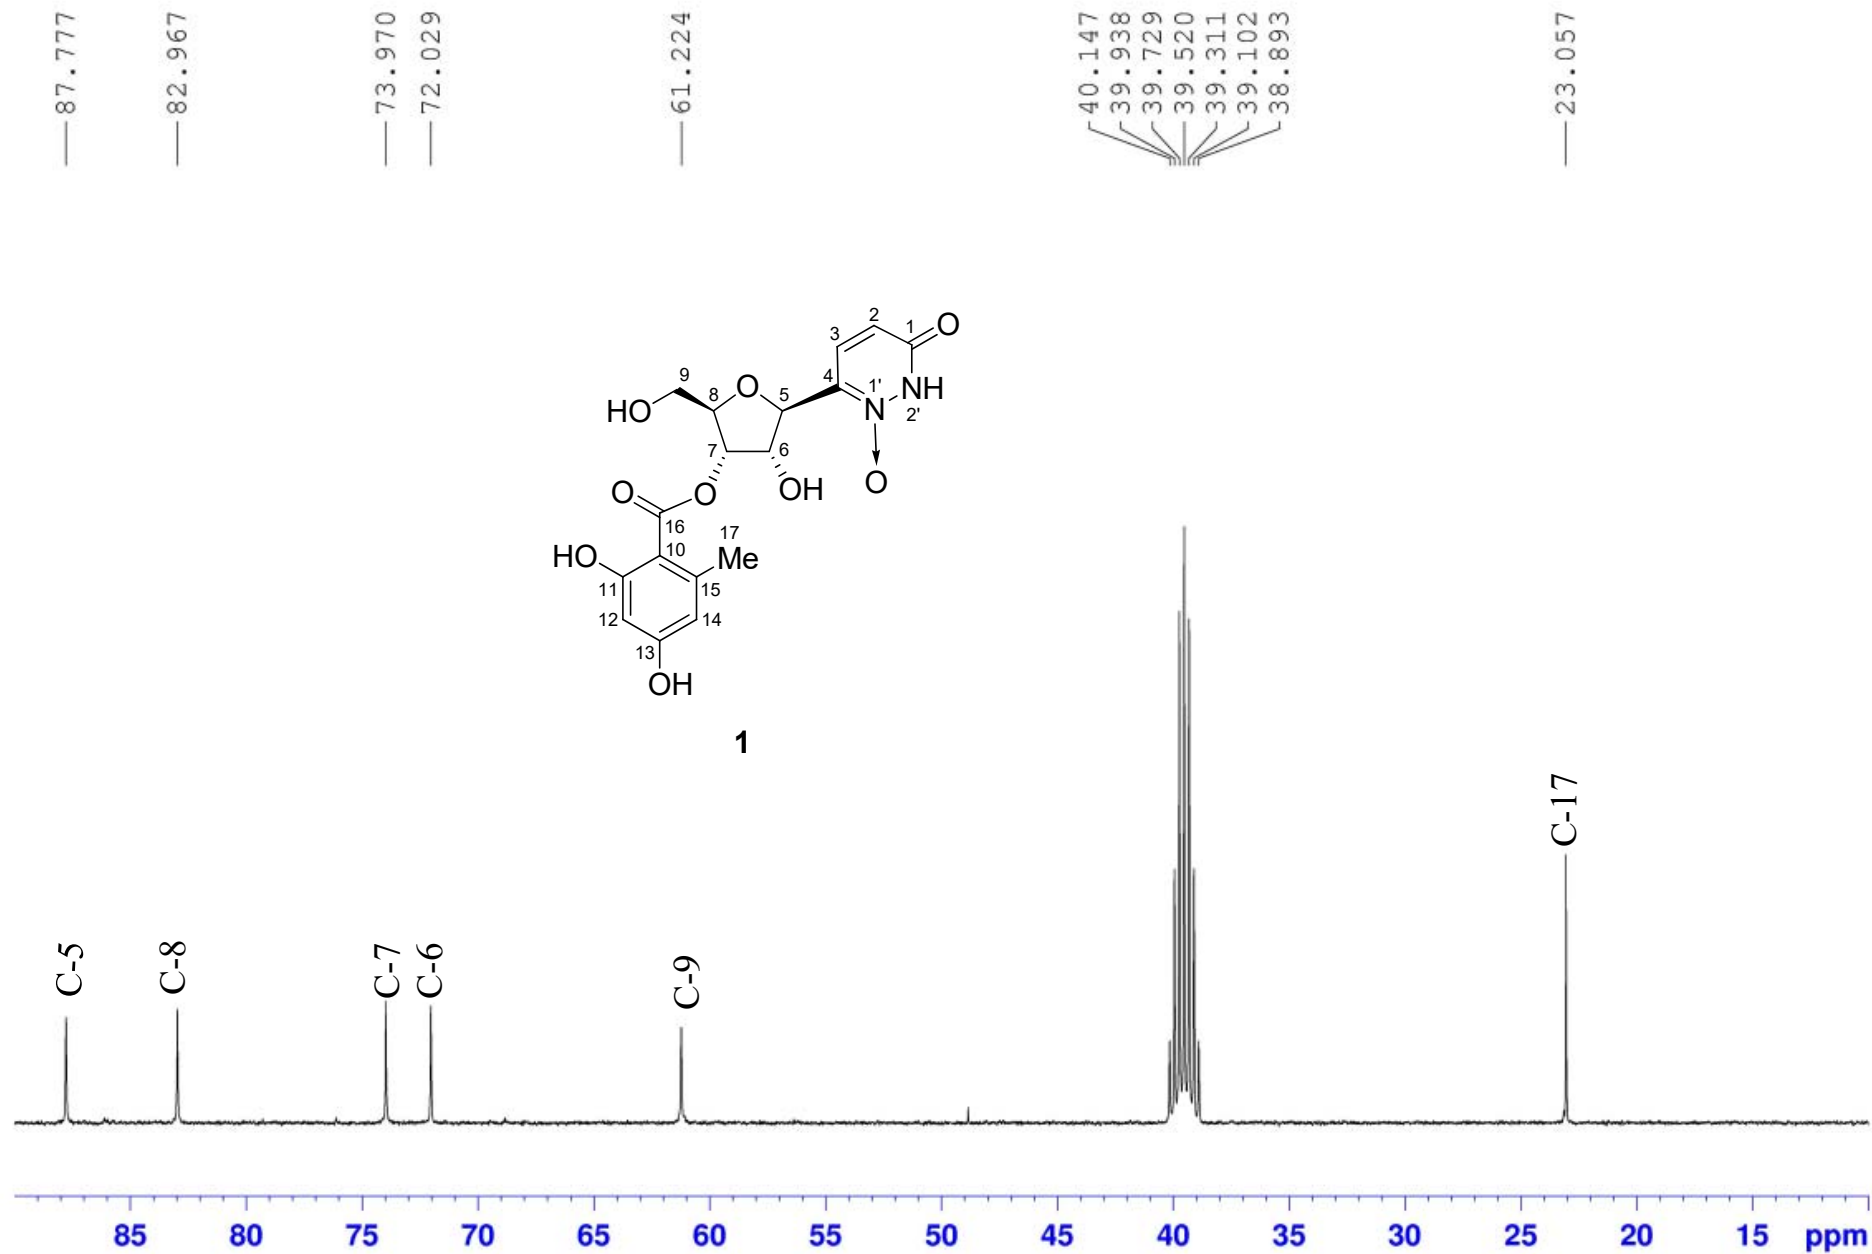

$^{13}\text{C}$  (100 MHz) NMR spectrum of **1** in  $\text{DMSO-}d_6$

—111.223

—106.250

—102.572

—100.939

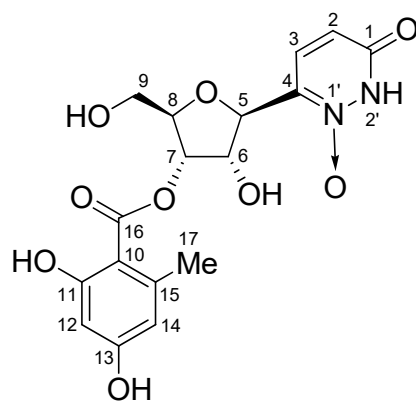

**1**

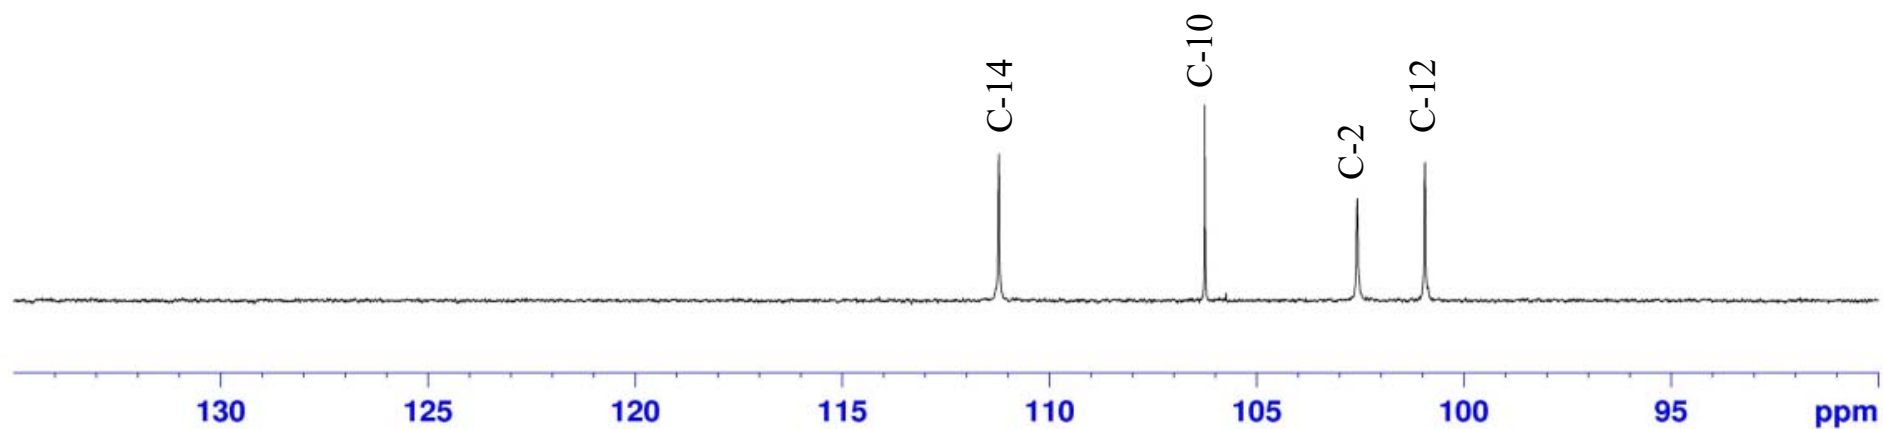

$^{13}\text{C}$  (100 MHz) NMR spectrum of **1** in  $\text{DMSO-}d_6$

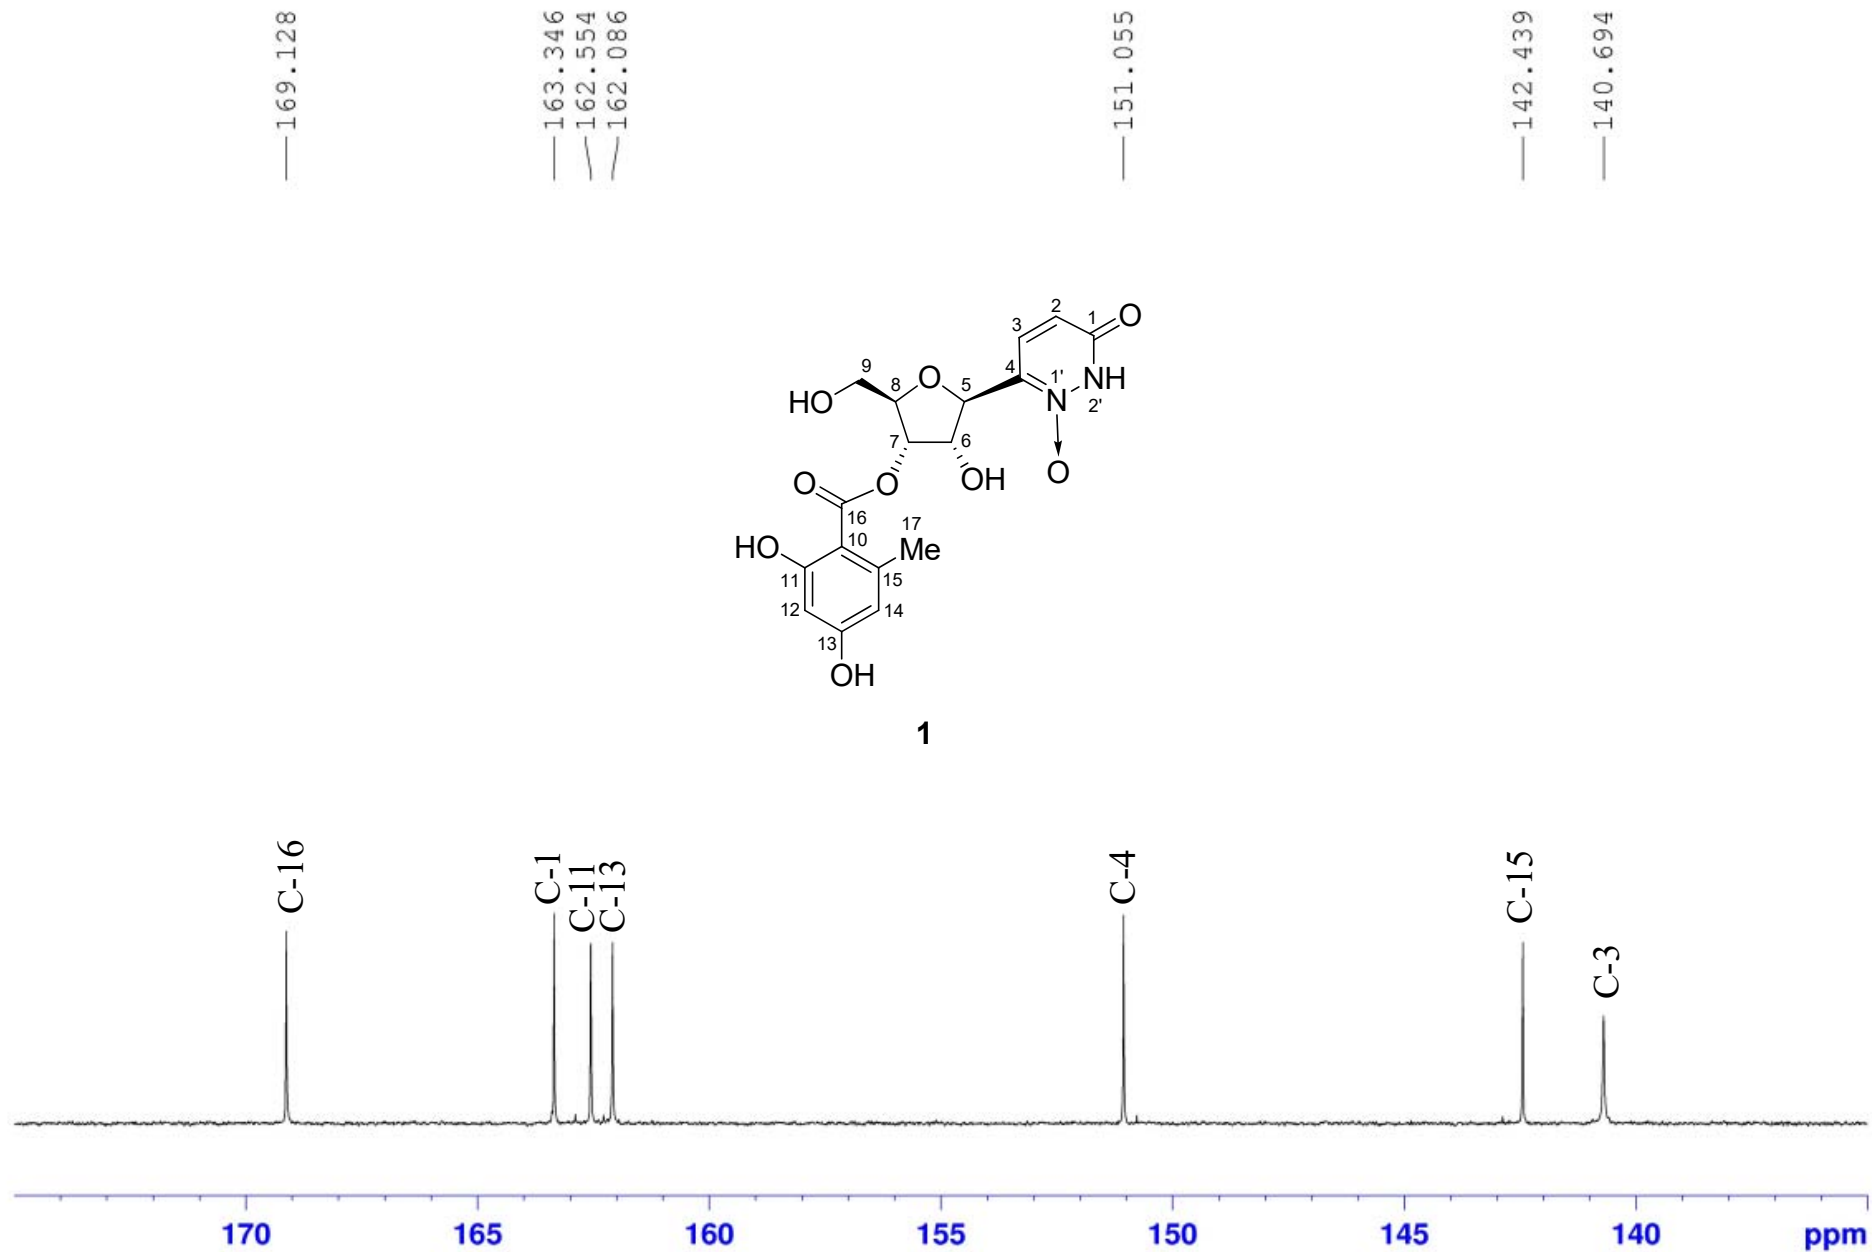

# DEPT135 (100 MHz) spectrum of **1** in DMSO-*d*<sub>6</sub>

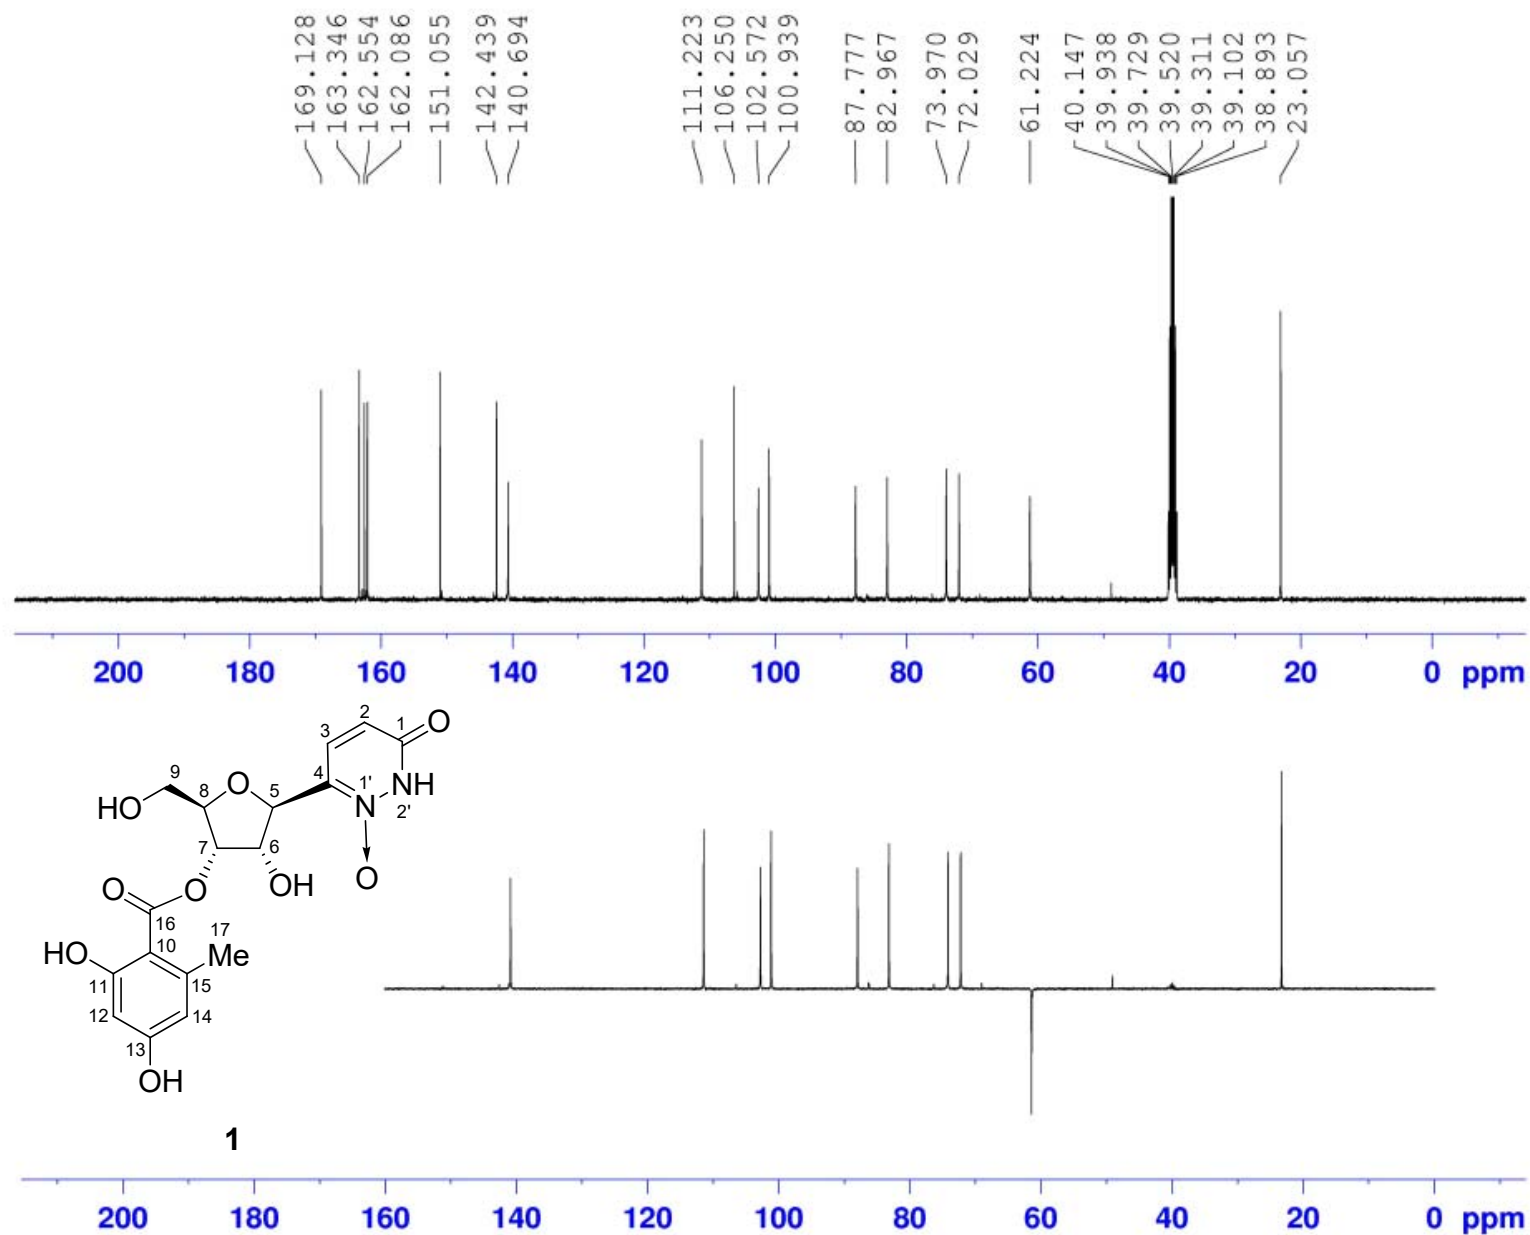

```

NAME      WBB-145-D
EXPNO     3
PROCNO    1
Date_     20210621
Time      22.30 h
INSTRUM   spect
PROBHD    Z108618_0231 (
PULPROG   deptspl35
TD        65536
SOLVENT   DMSO
NS        150
DS        8
SWH       16129.032 Hz
FIDRES    0.492219 Hz
AQ        2.0316660 sec
RG        2050
DW        31.000 usec
DE        6.50 usec
TE        299.3 K
CNST2     145.0000000
D1        2.00000000 sec
D2        0.00344828 sec
D12       0.00002000 sec
TD0       1
SF01      100.6384205 MHz
NUC1      13C
P1        8.25 usec
P13       2000.00 usec
SI        32768
SF        100.6303700 MHz
WDW       EM
SSB       0
LB        1.00 Hz
GB        0
PC        1.40
    
```

DEPT135 (100 MHz) spectrum of **1** in DMSO-*d*<sub>6</sub>

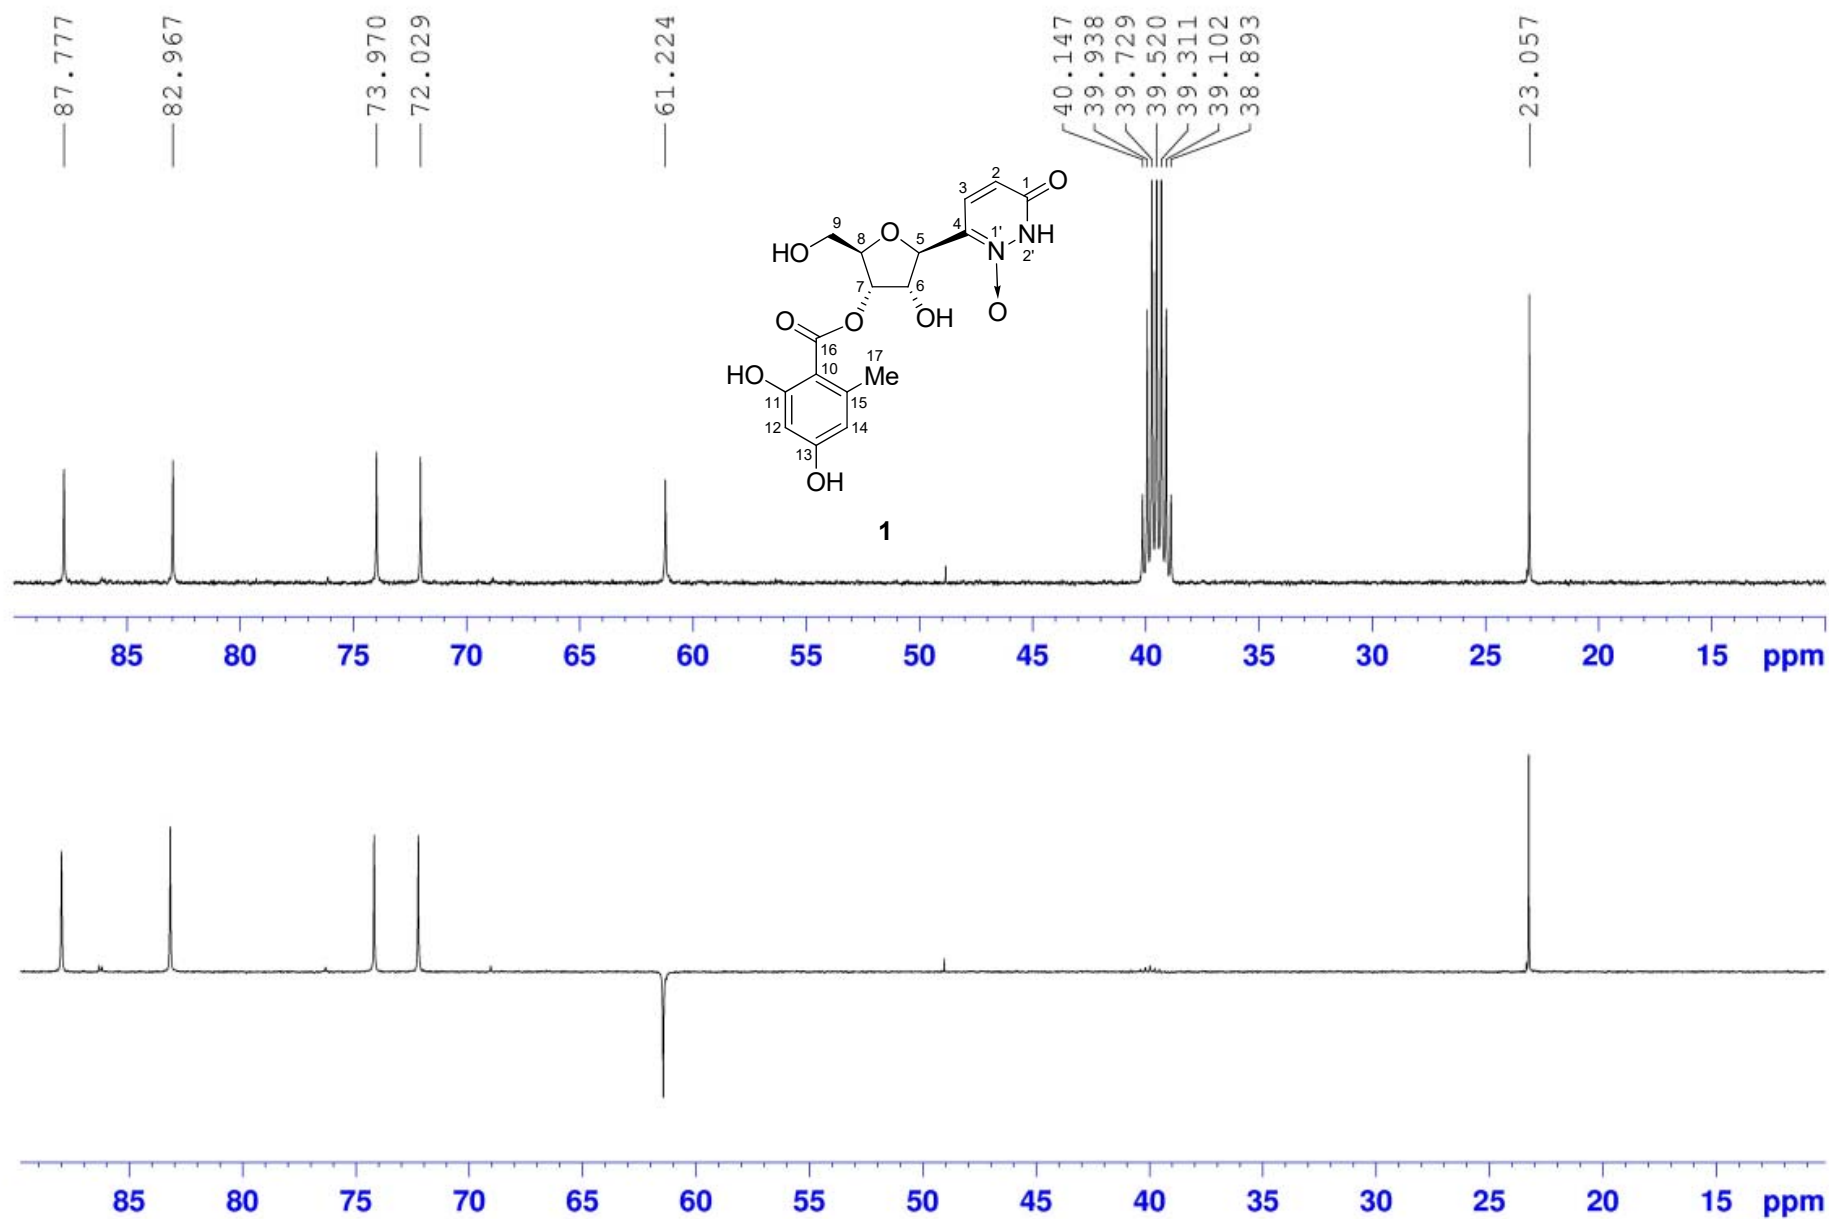

DEPT135 (100 MHz) spectrum of **1** in DMSO-*d*<sub>6</sub>

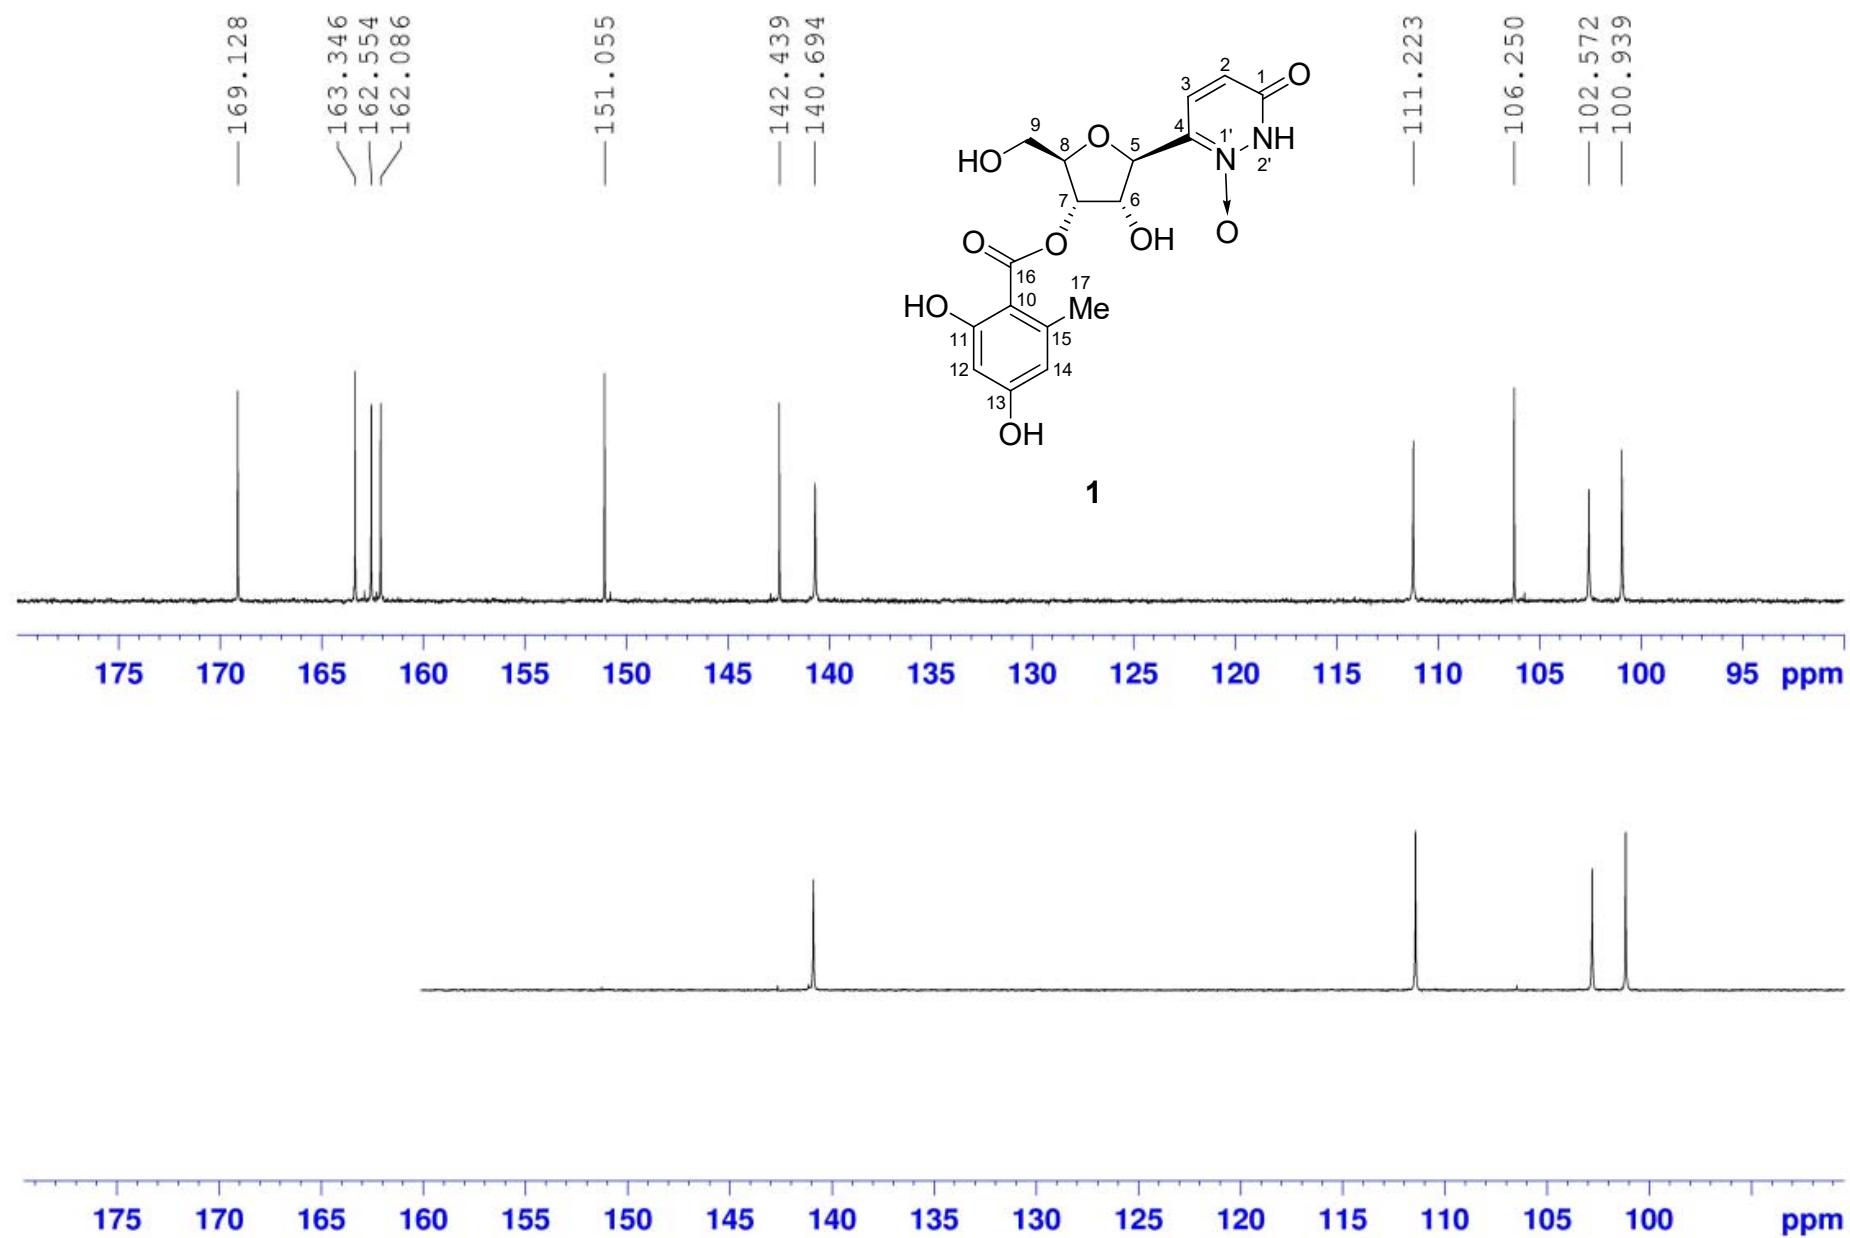

$^1\text{H}$ - $^1\text{H}$  COSY (400 MHz) spectrum of **1** in  $\text{DMSO-}d_6$

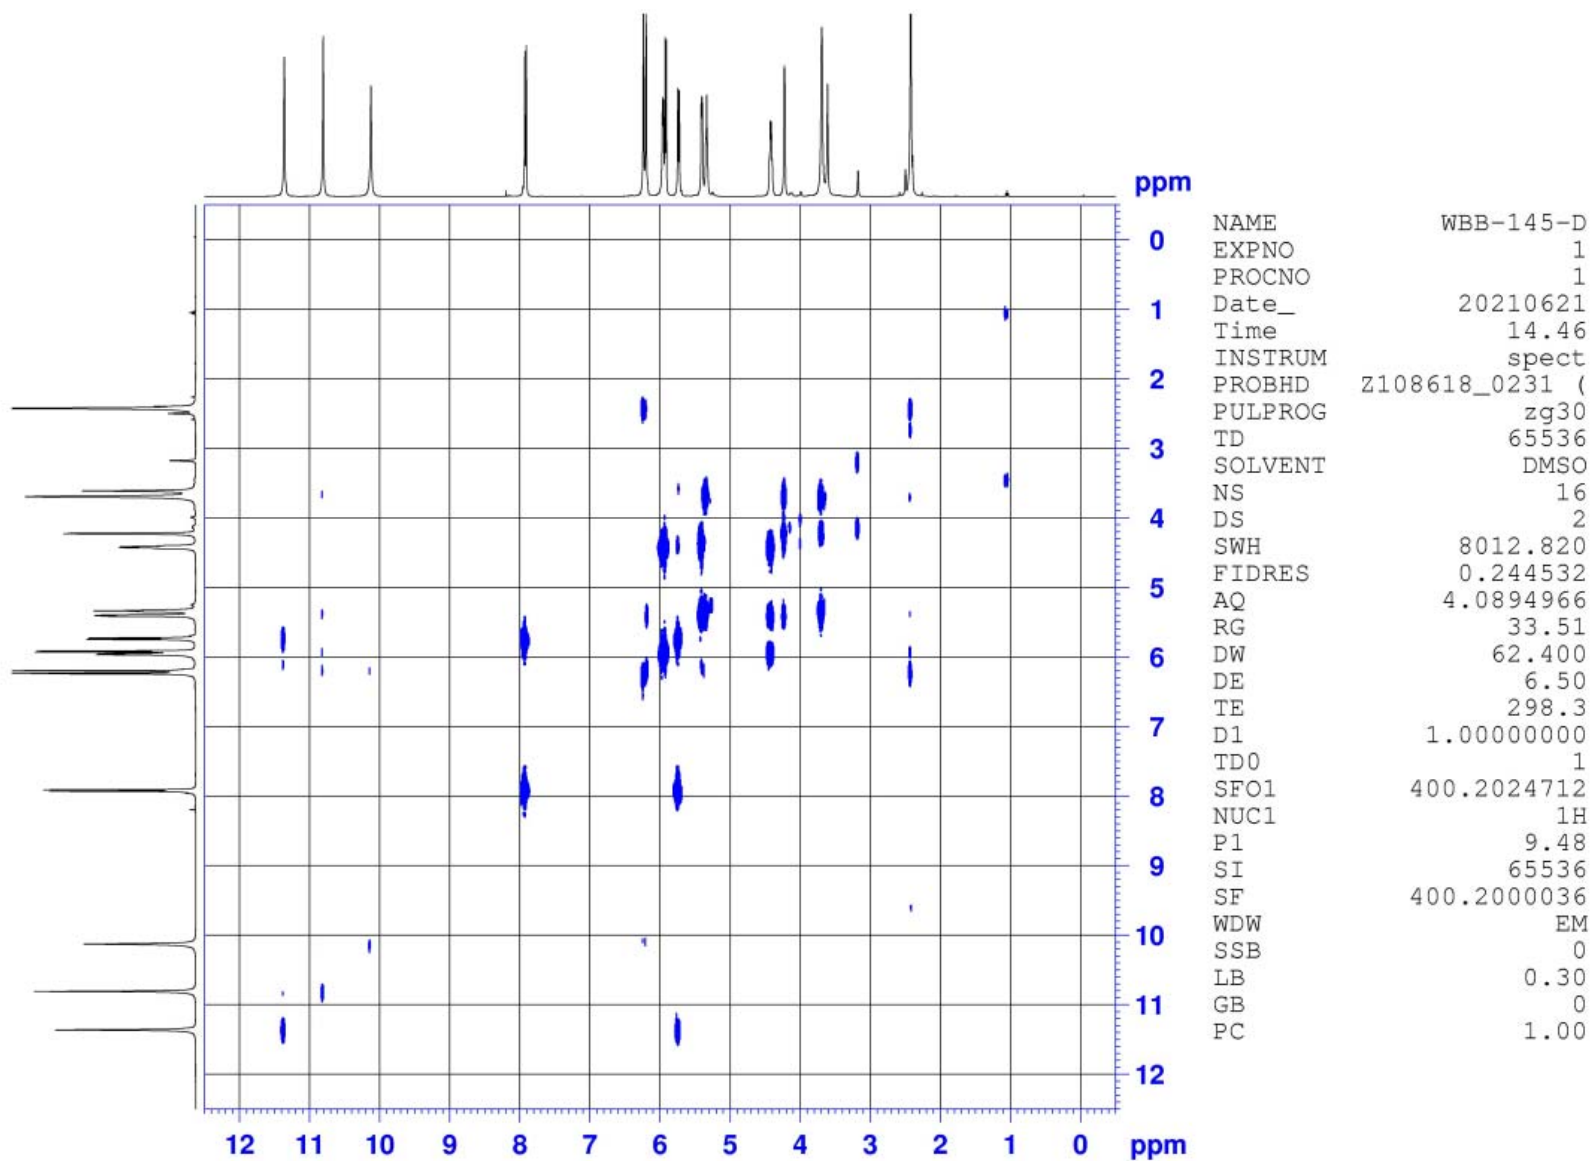



$^1\text{H}$ - $^1\text{H}$  COSY (400 MHz) spectrum of **1** in  $\text{DMSO-}d_6$

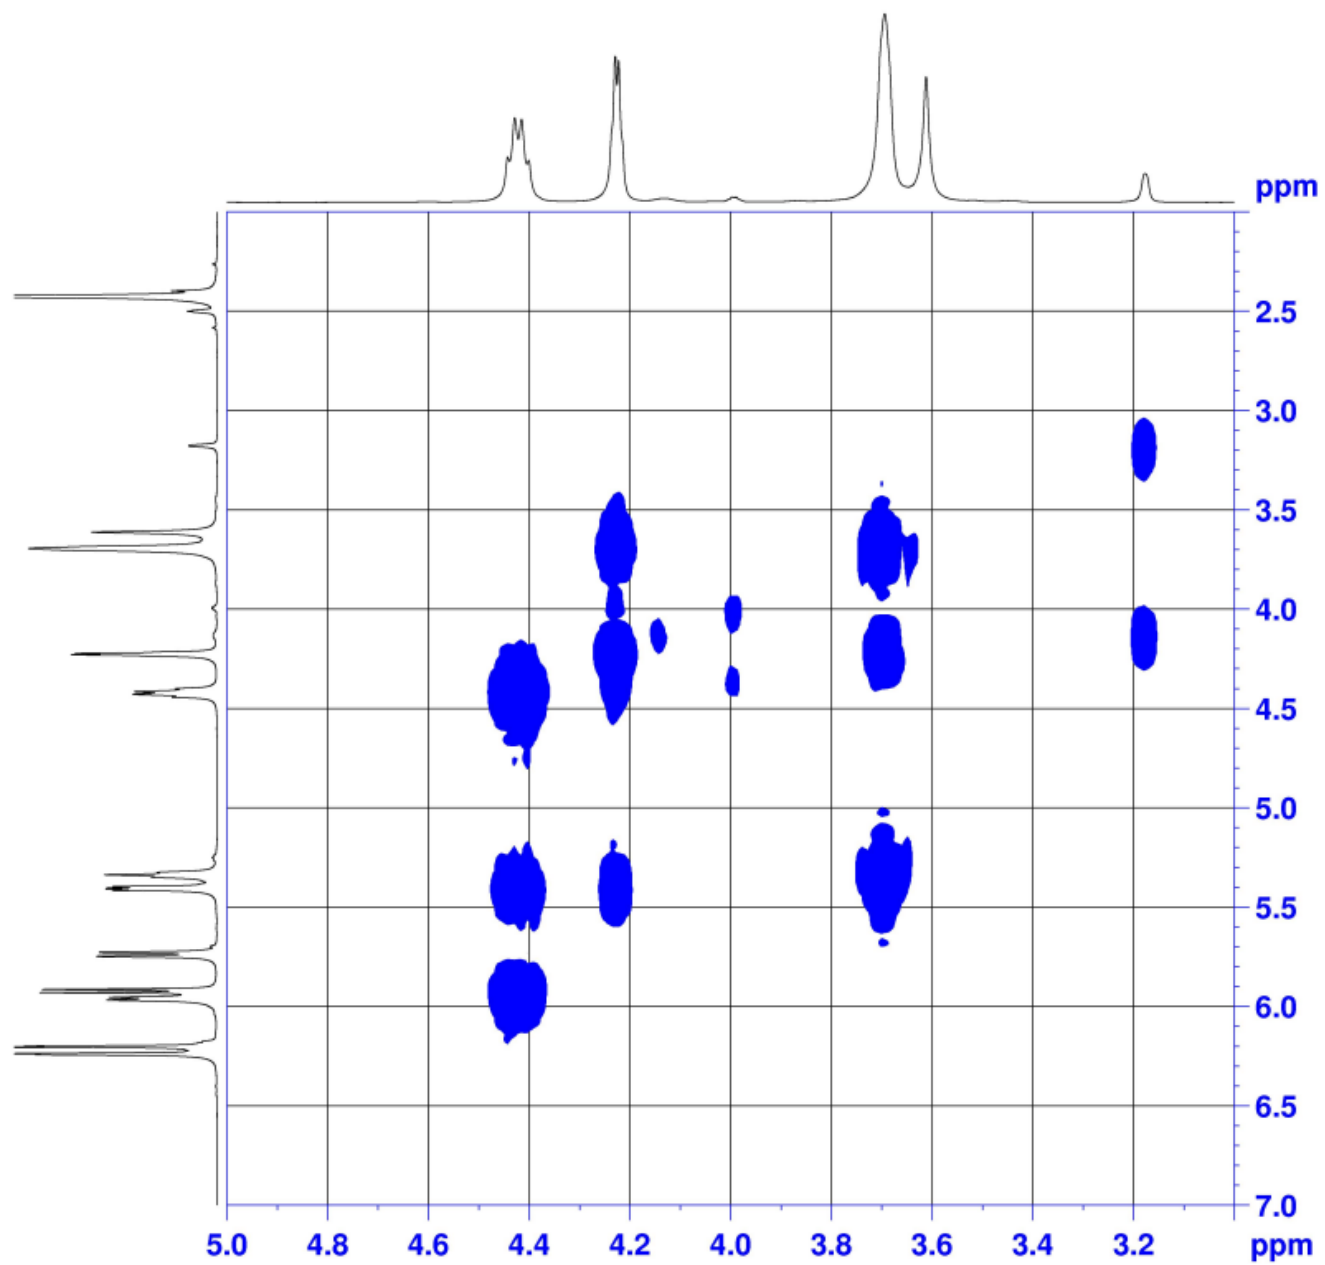

<sup>1</sup>H-<sup>1</sup>H COSY (400 MHz) spectrum of **1** in DMSO-*d*<sub>6</sub>

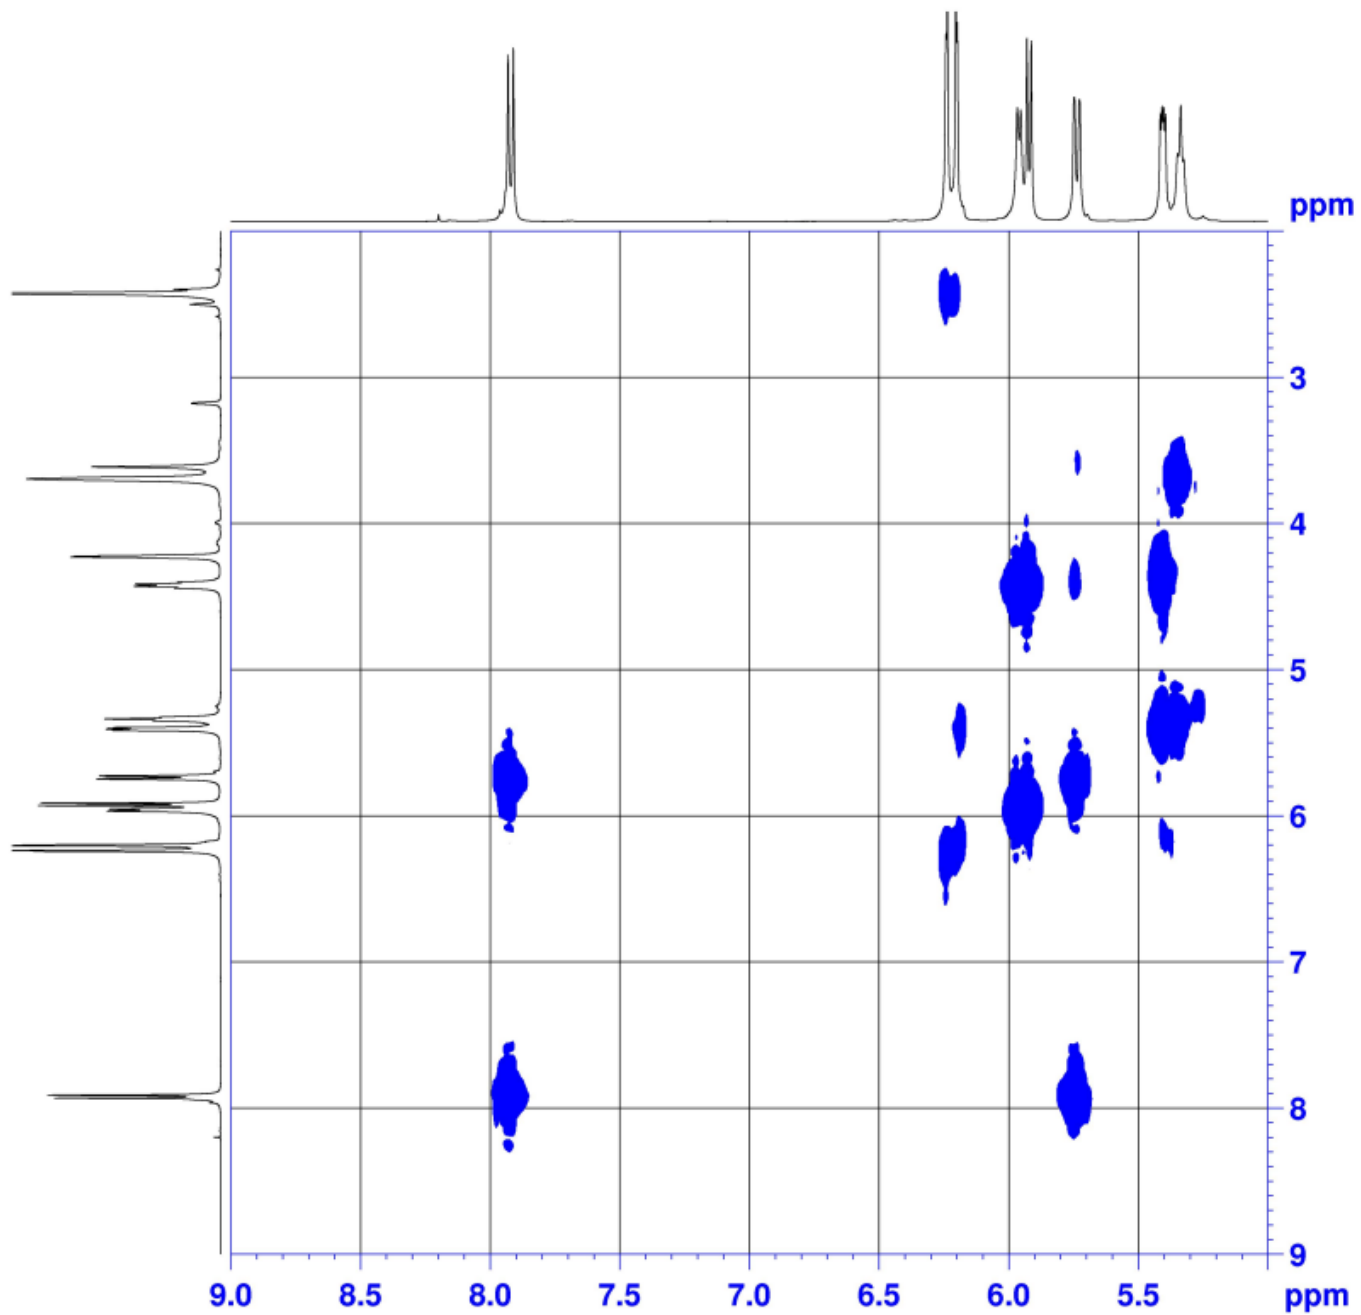

# HSQC (400 MHz) spectrum of **1** in DMSO- $d_6$

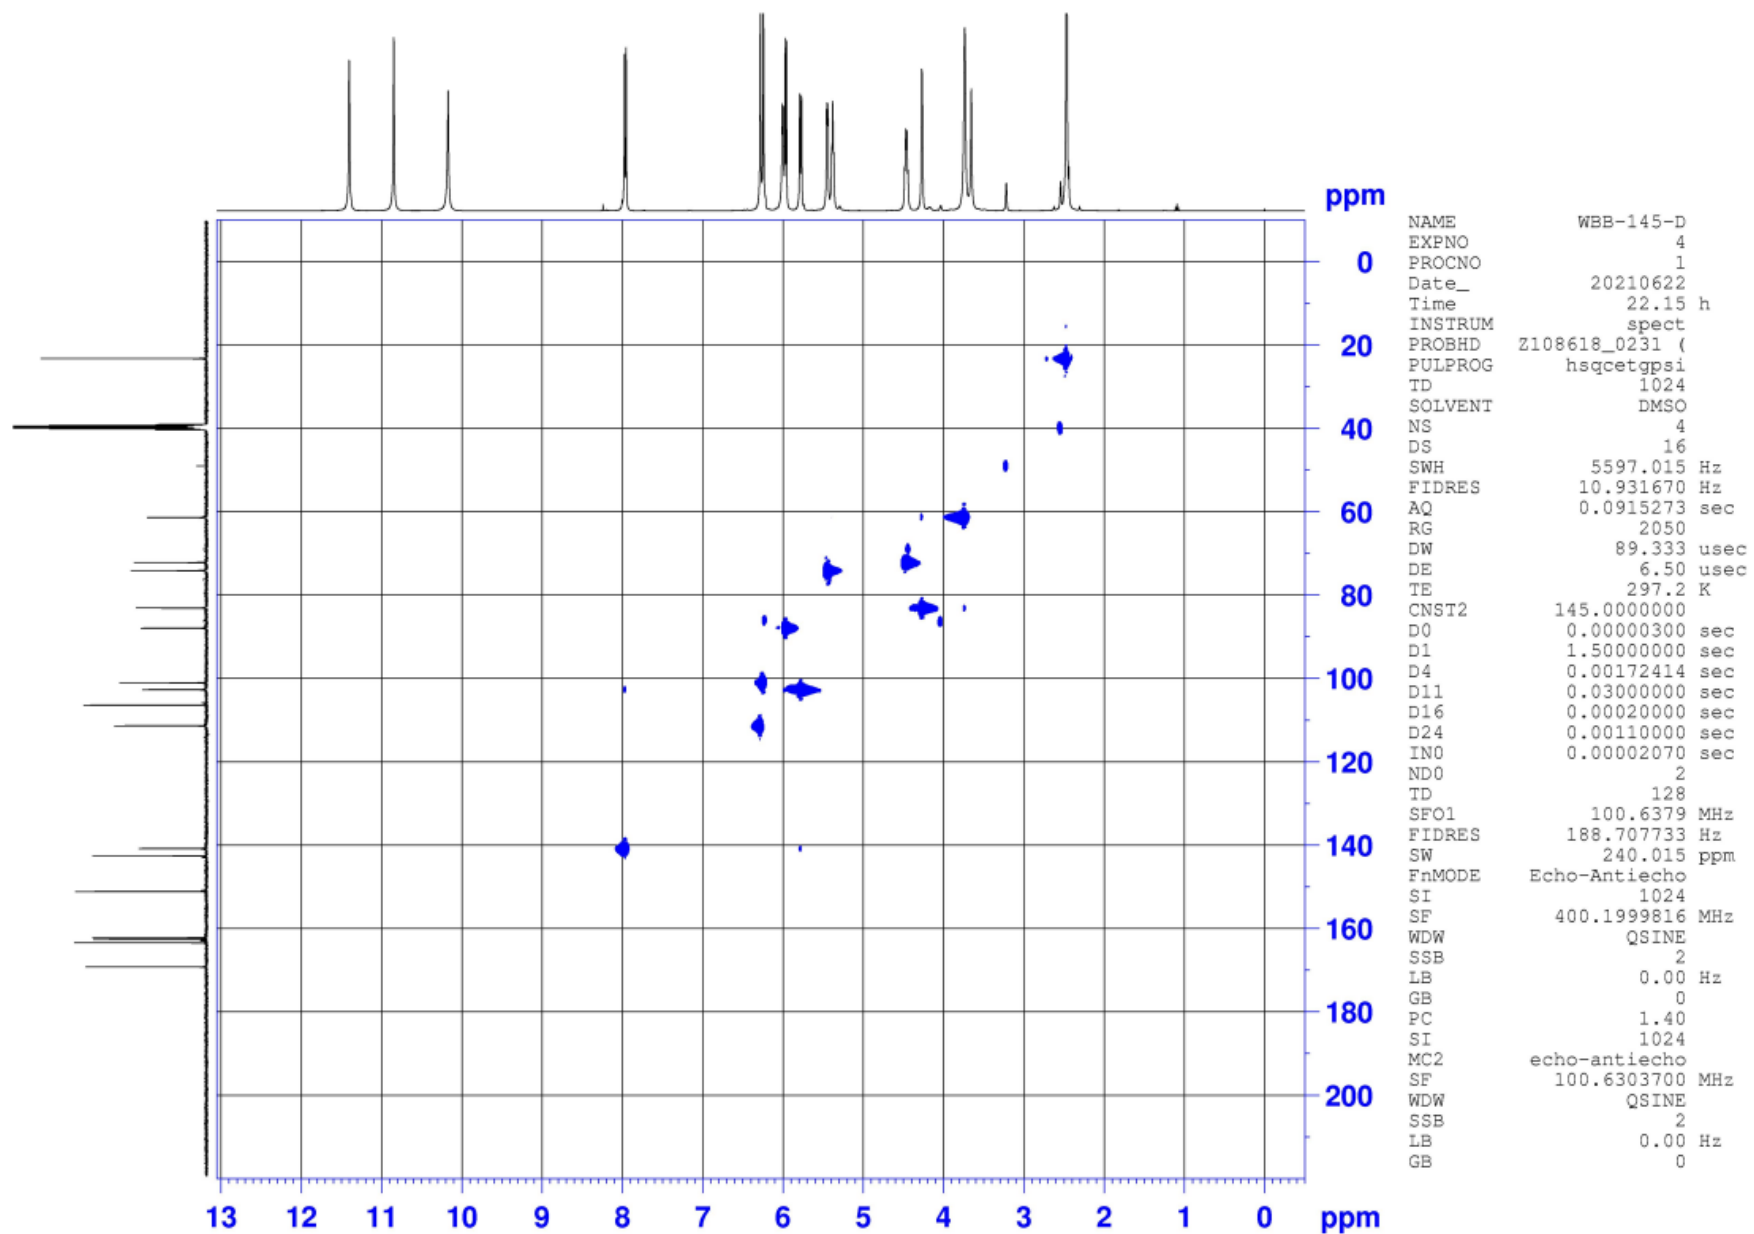

HSQC (400 MHz) spectrum of **1** in DMSO- $d_6$

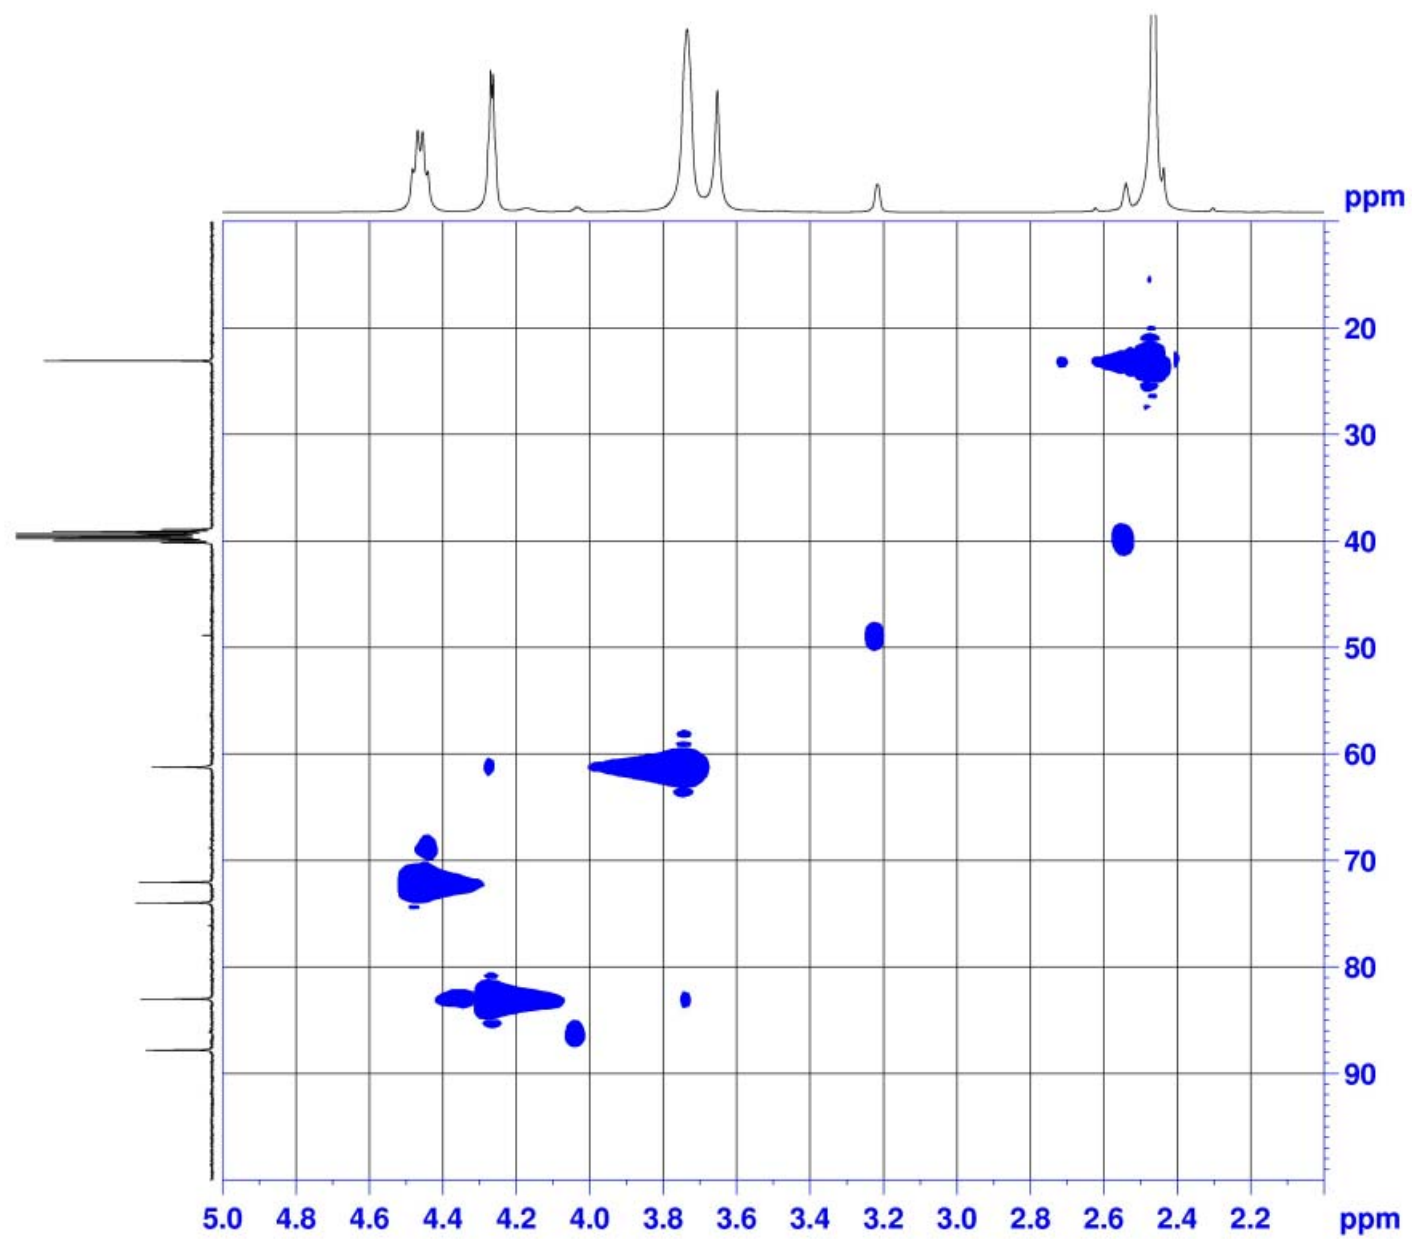

HSQC (400 MHz) spectrum of **1** in DMSO- $d_6$

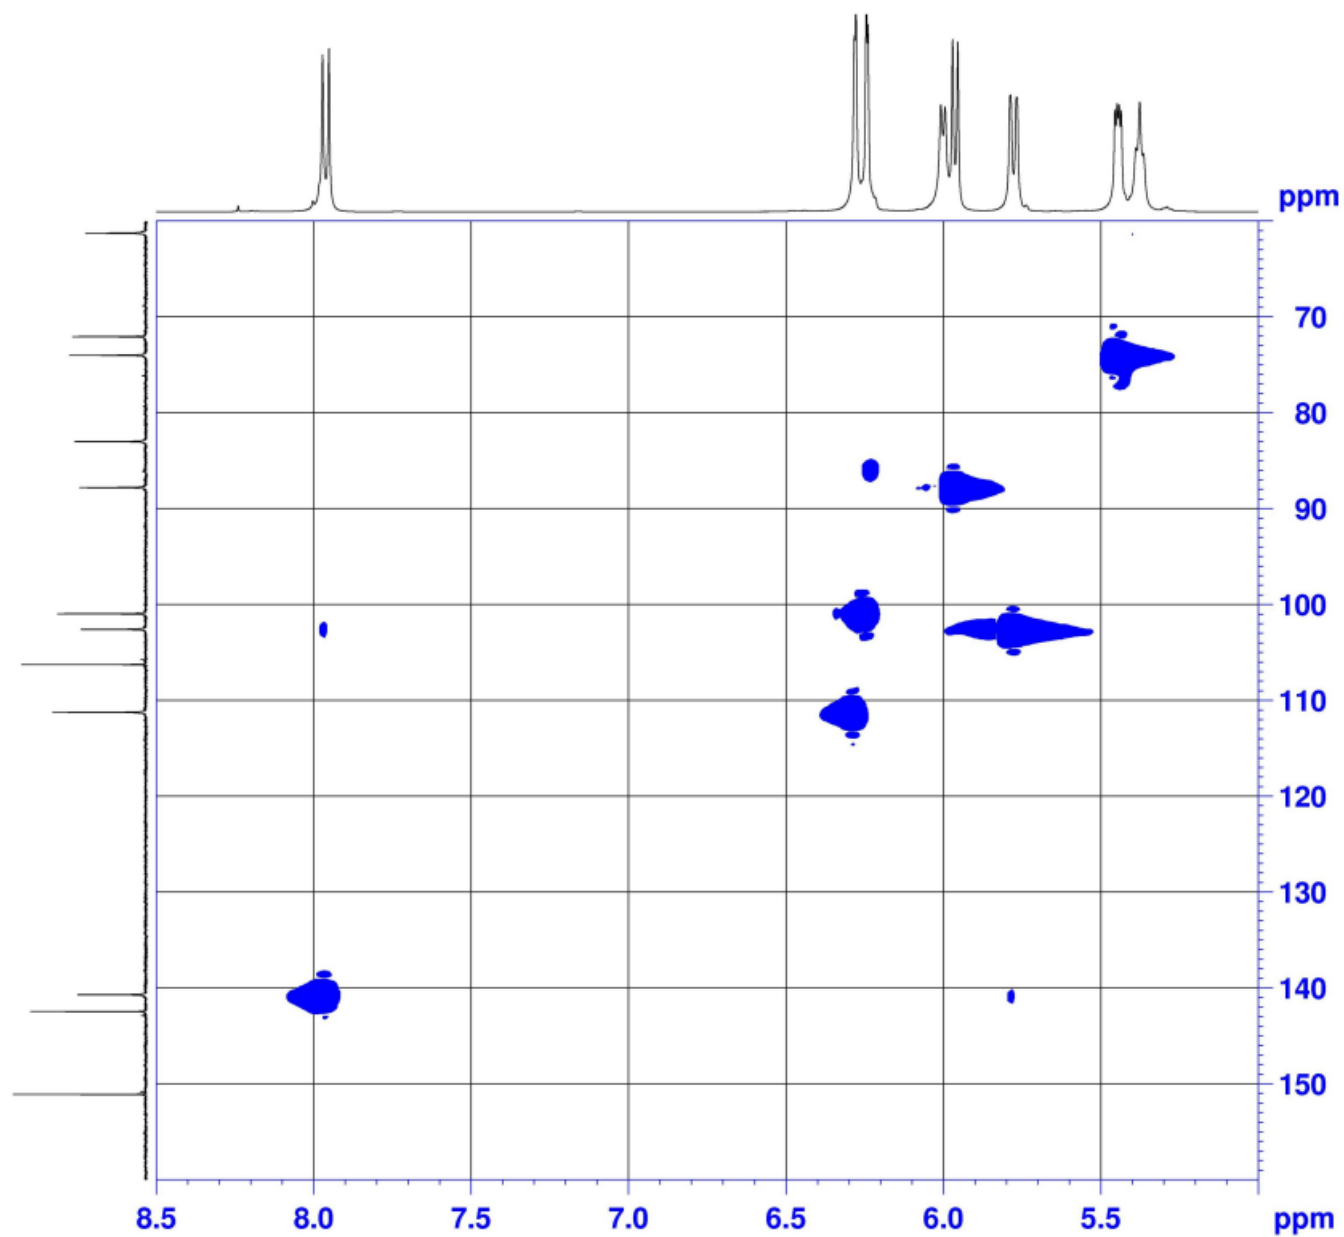

# HMBC (400 MHz) spectrum of **1** in DMSO- $d_6$

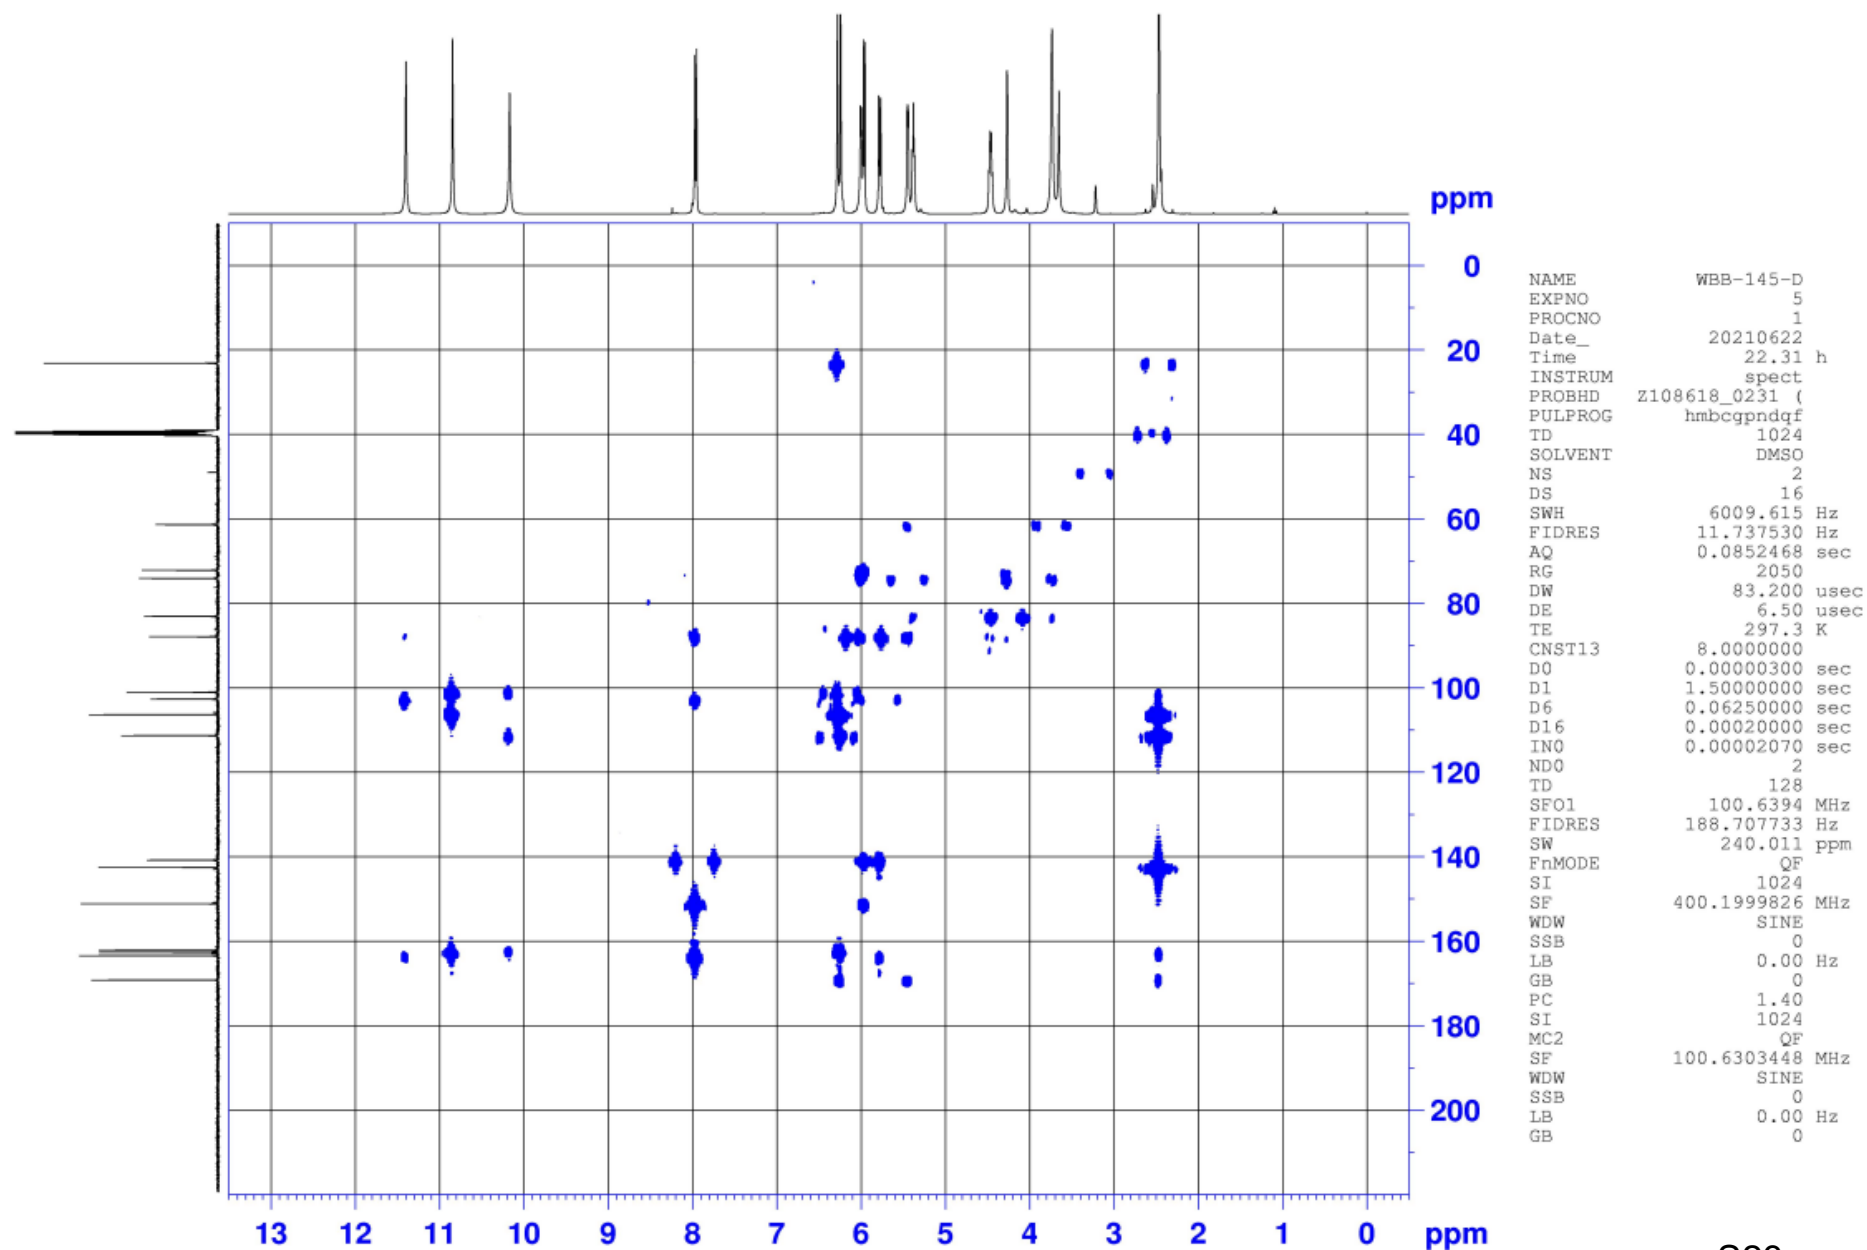

HMBC (400 MHz) spectrum of **1** in DMSO- $d_6$

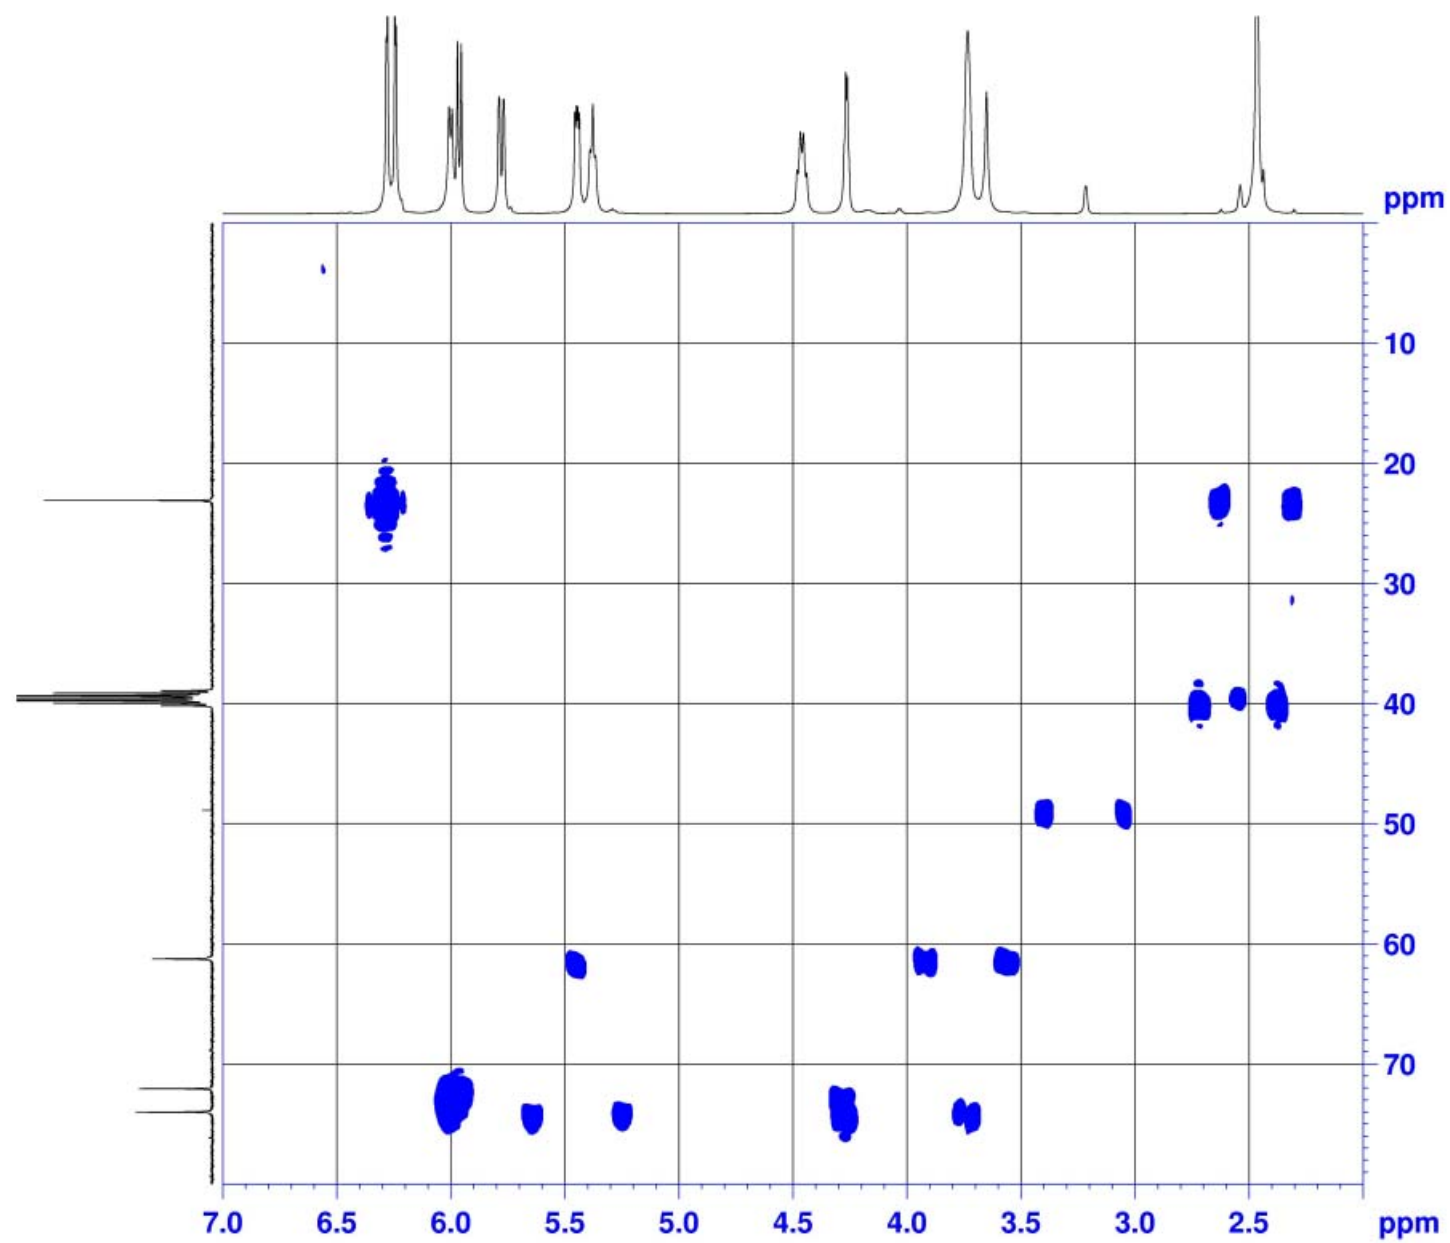

HMBC (400 MHz) spectrum of **1** in DMSO- $d_6$

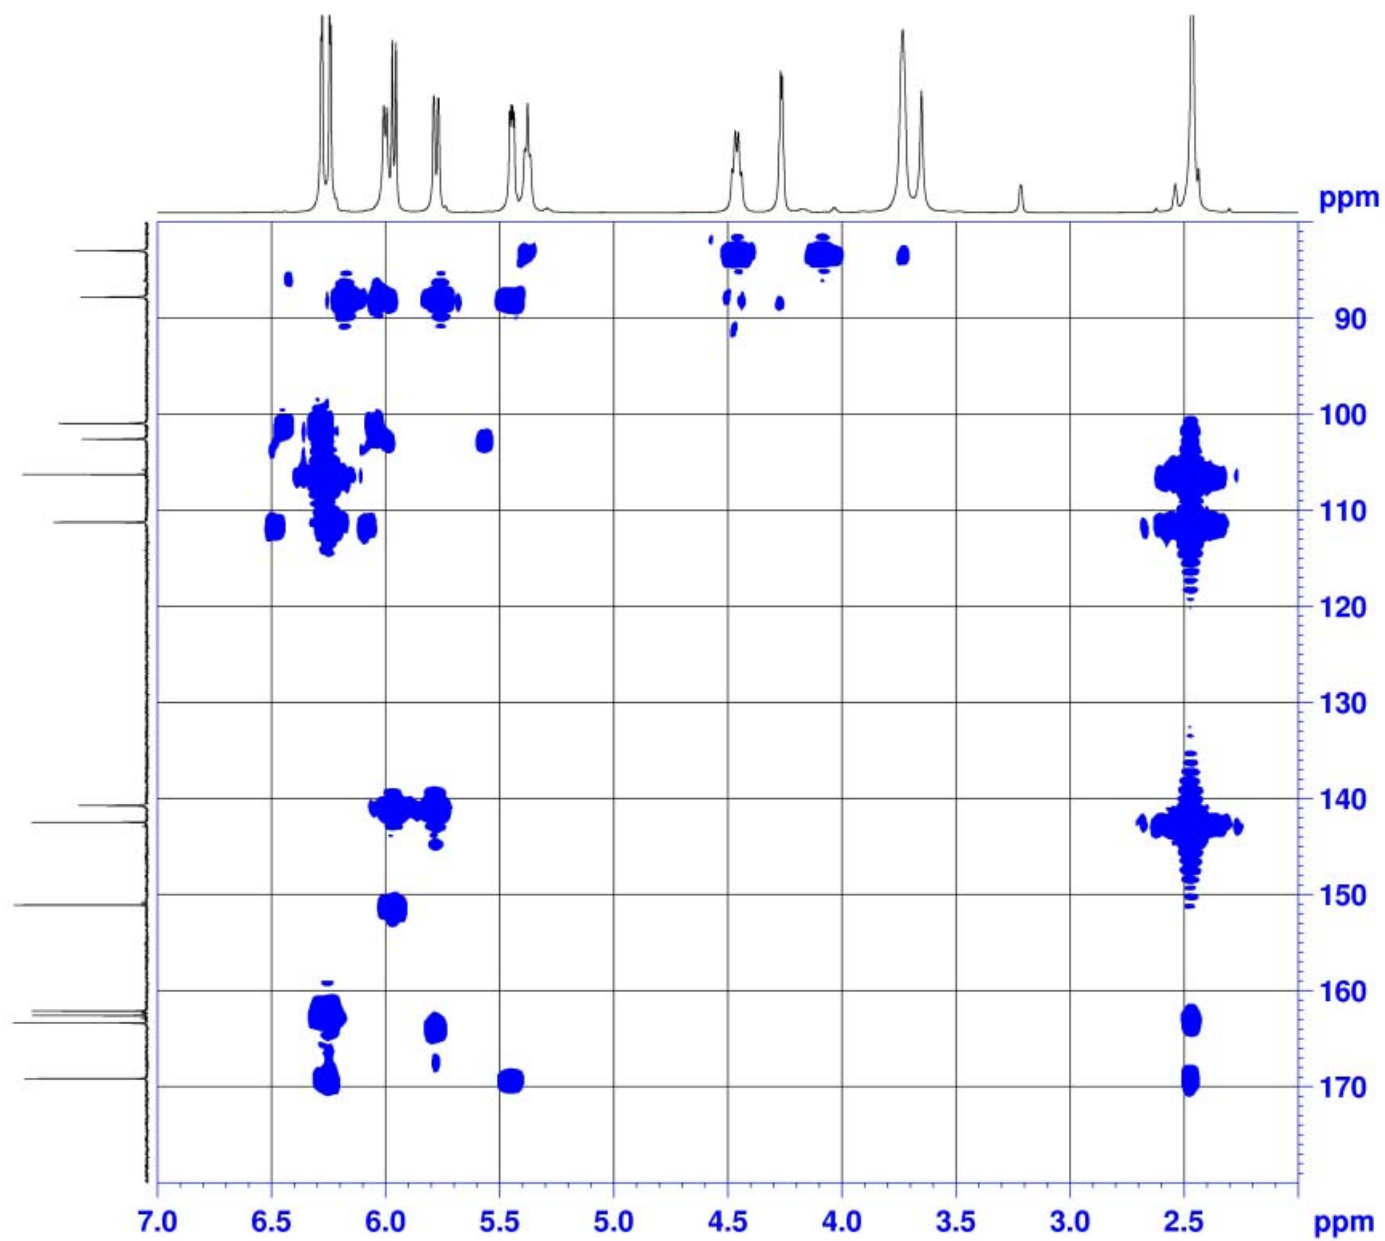



HMBC (400 MHz) spectrum of **1** in DMSO- $d_6$

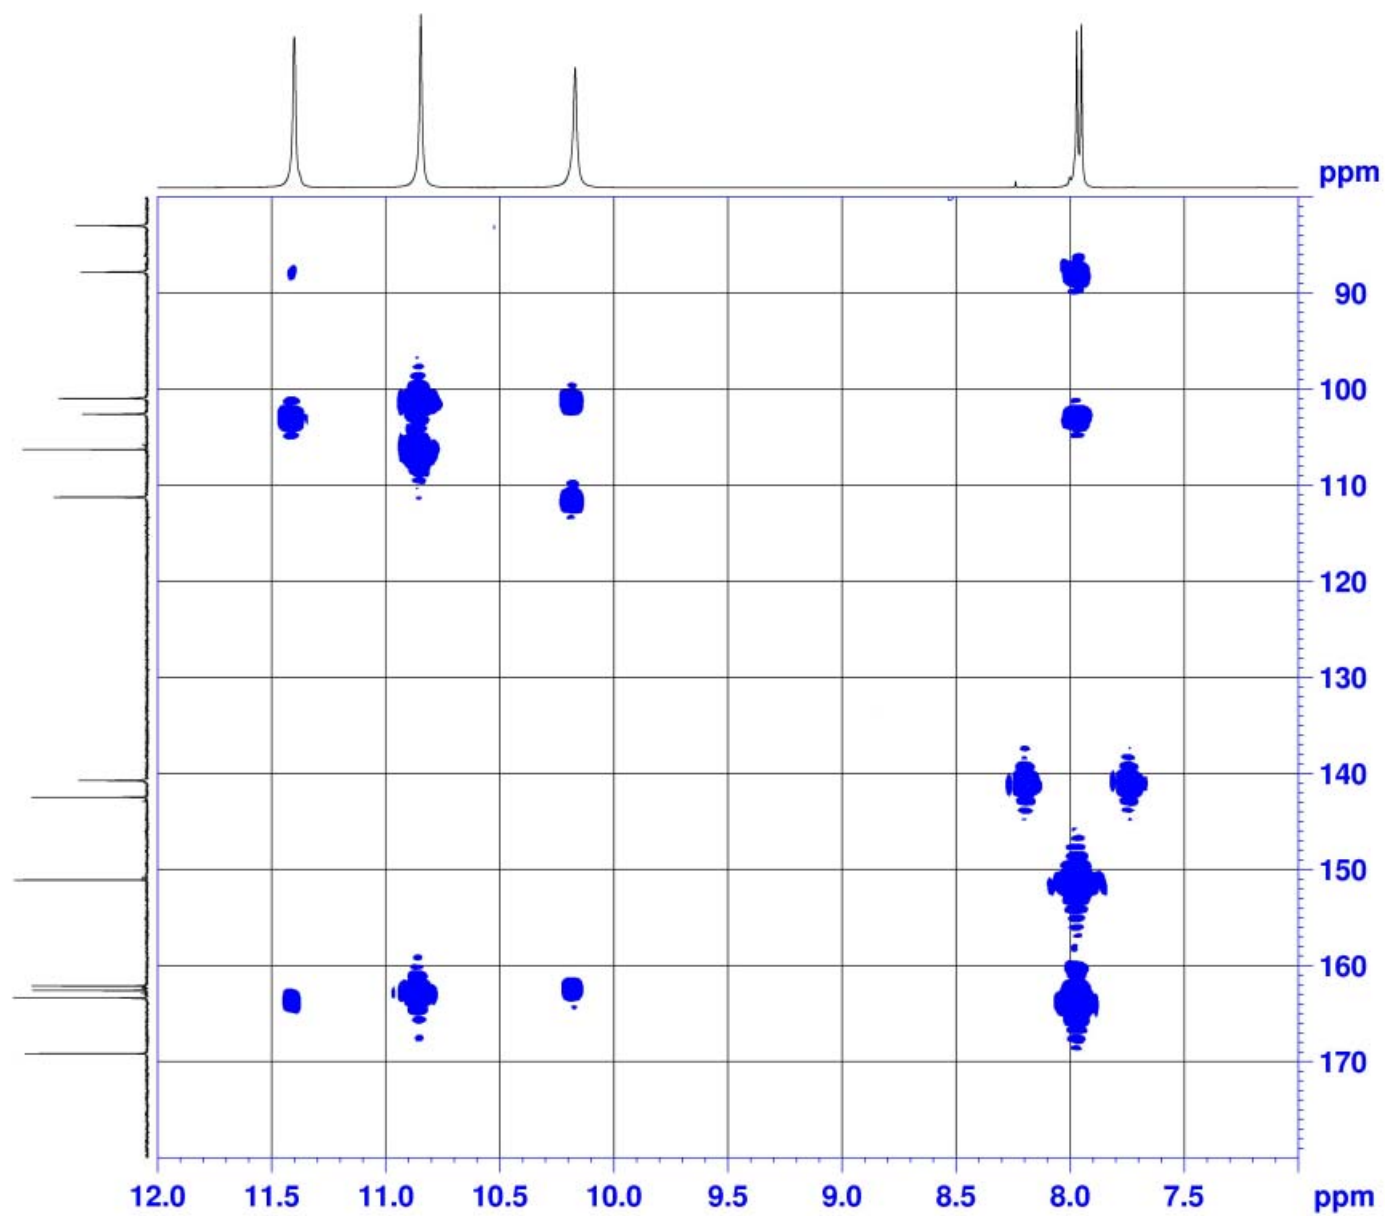

# NOESY (400 MHz) spectrum of **1** in DMSO-*d*<sub>6</sub>

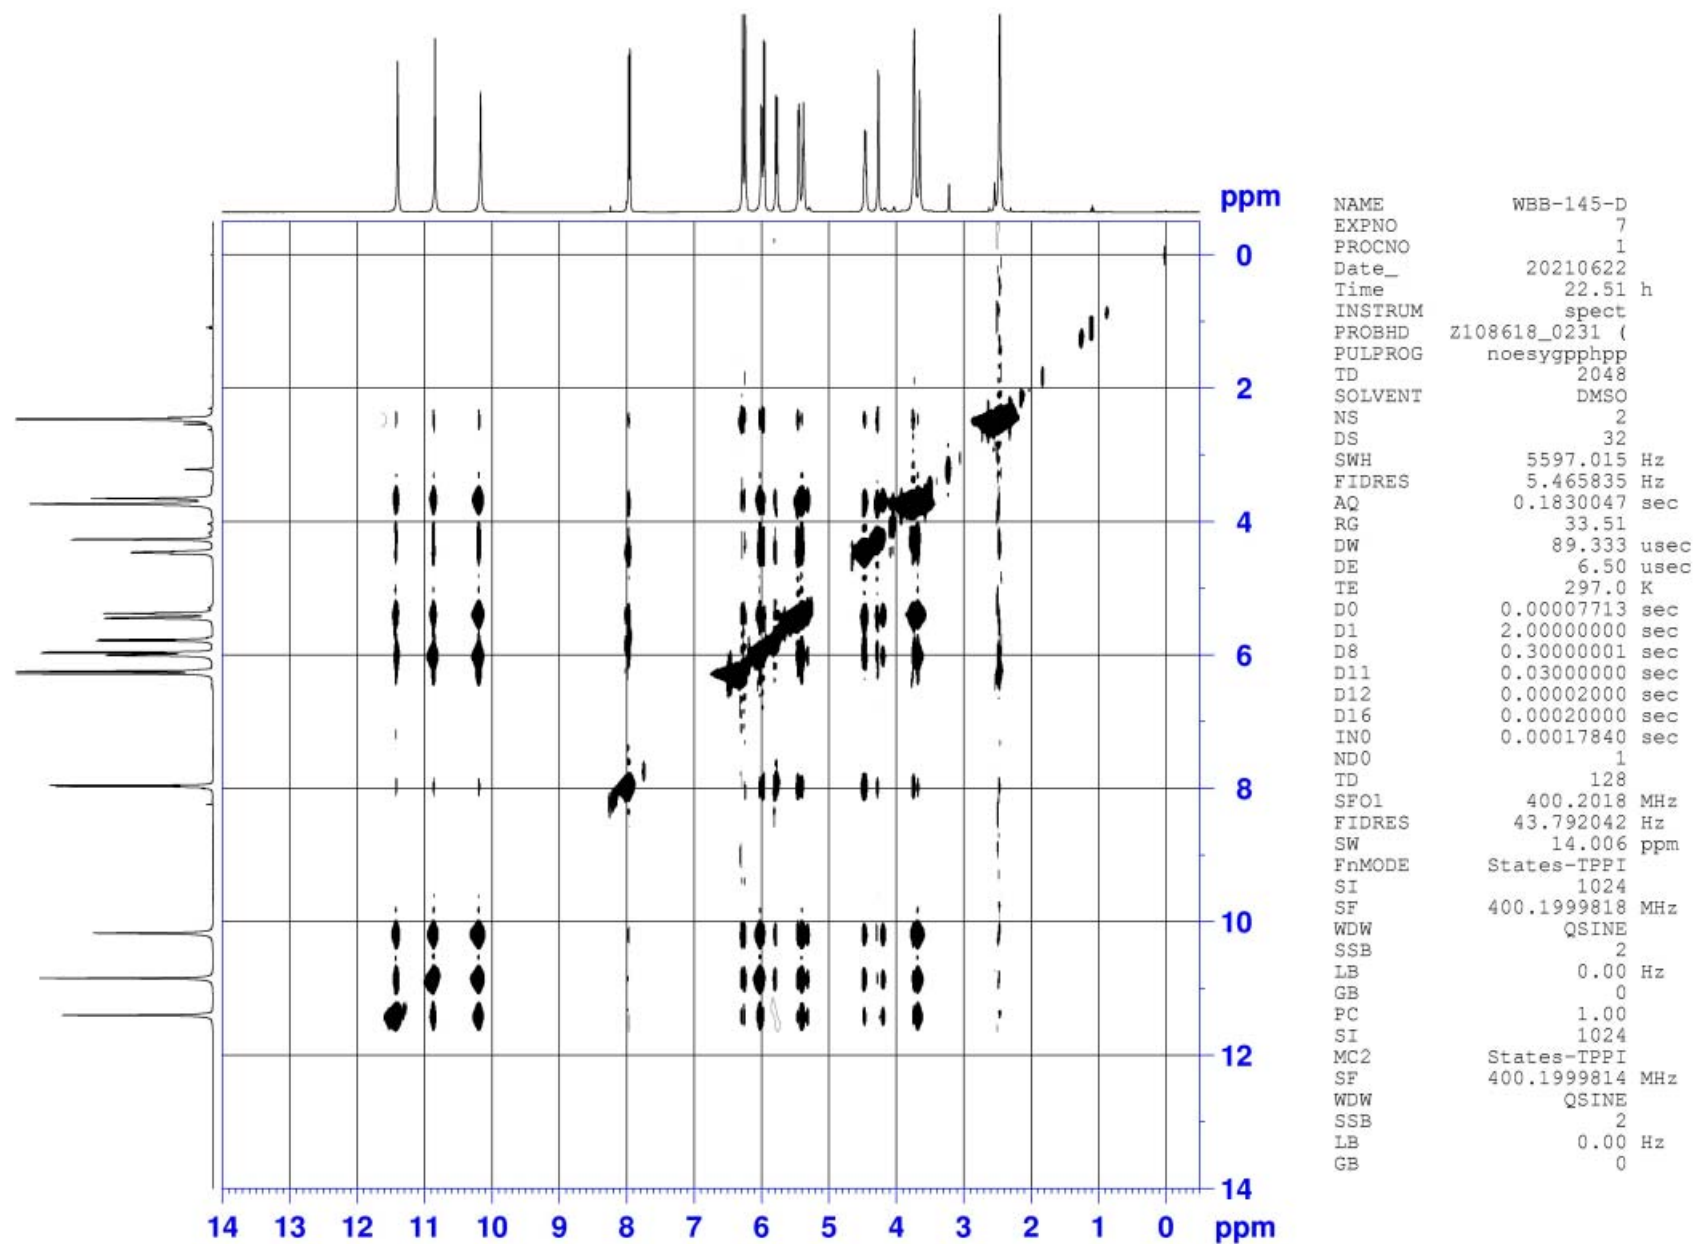

NOESY (400 MHz) spectrum of **1** in DMSO- $d_6$

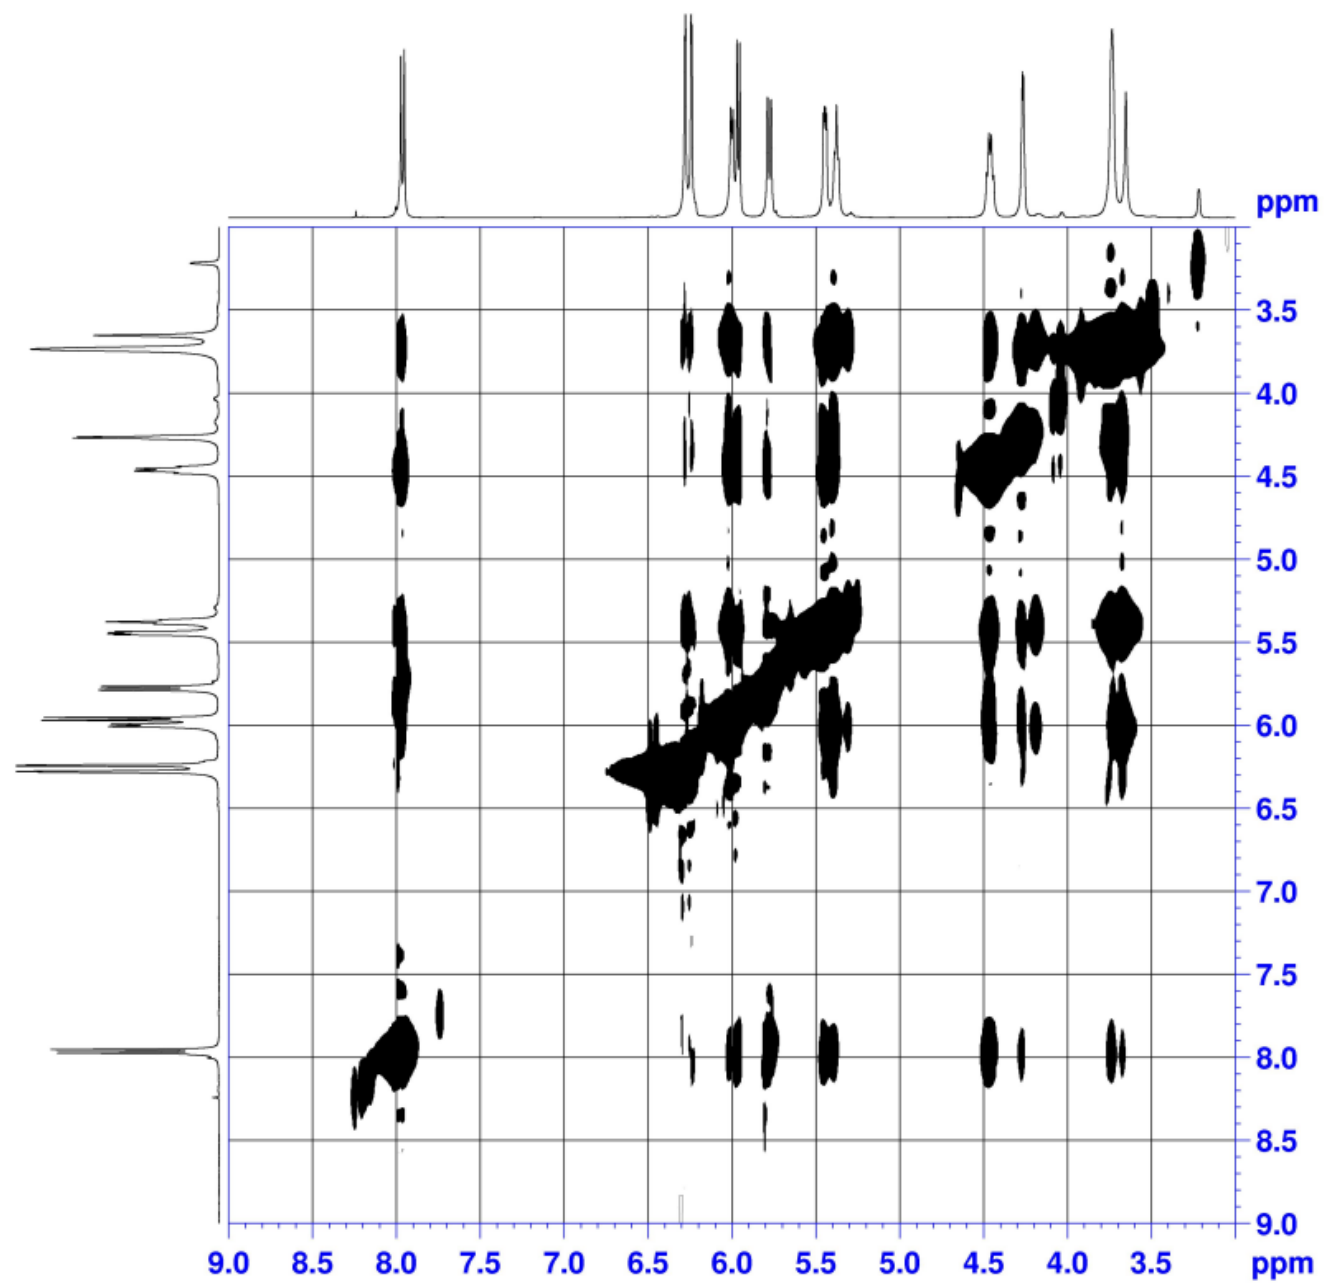

# HR-ESIMS for 2

## Mass Spectrum SmartFormula Report

### Analysis Info

Analysis Name D:\Data\MS\data\202104\renyanxia\_W\_pos\_65\_01\_10385.d  
Method LC\_Direct Infusion\_pos\_70-500mz.m  
Sample Name renyanxia\_W\_pos  
Comment

Acquisition Date 4/1/2021 5:30:07 PM  
Operator SCSIO  
Instrument maXis 255552.00029

### Acquisition Parameter

| Source Type | ESI      | Ion Polarity         | Positive | Set Nebulizer    | 0.4 Bar   |
|-------------|----------|----------------------|----------|------------------|-----------|
| Focus       | Active   | Set Capillary        | 4500 V   | Set Dry Heater   | 180 °C    |
| Scan Begin  | 70 m/z   | Set End Plate Offset | -500 V   | Set Dry Gas      | 4.0 l/min |
| Scan End    | 1500 m/z | Set Charging Voltage | 0 V      | Set Divert Valve | Waste     |
|             |          | Set Corona           | 0 nA     | Set APCI Heater  | 0 °C      |

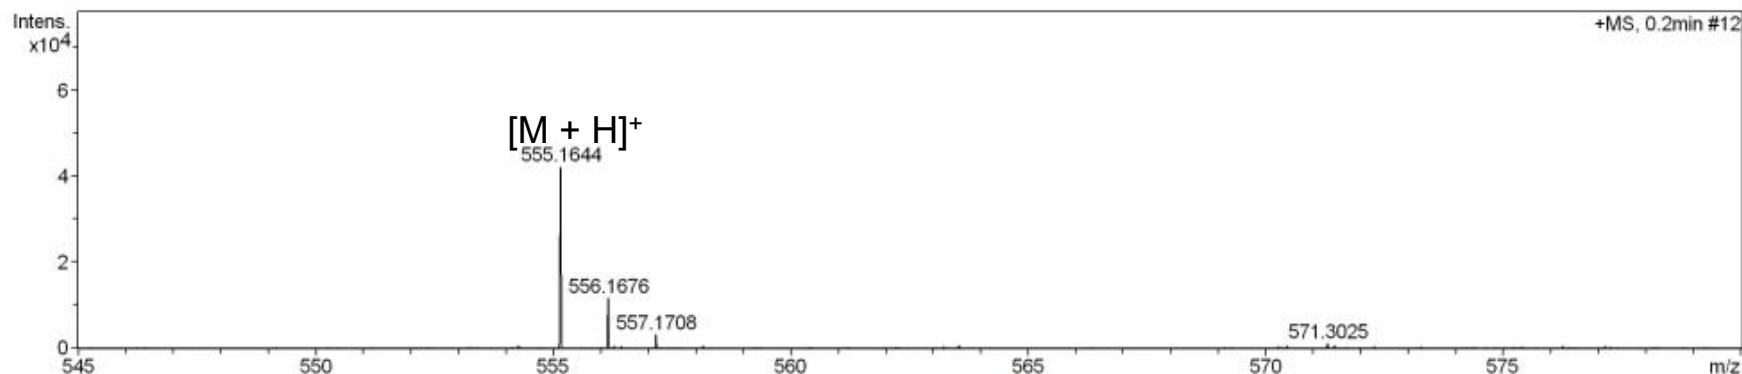

| Meas. m/z | # | Ion Formula | Score  | m/z      | err [ppm] | err [mDa] | mSigma | rdb  | e <sup>-</sup> | Conf | N-Rule |
|-----------|---|-------------|--------|----------|-----------|-----------|--------|------|----------------|------|--------|
| 555.1644  | 1 | C32H27O9    | 100.00 | 555.1650 | -1.1      | -0.6      | 37.1   | 19.5 | even           |      | ok     |

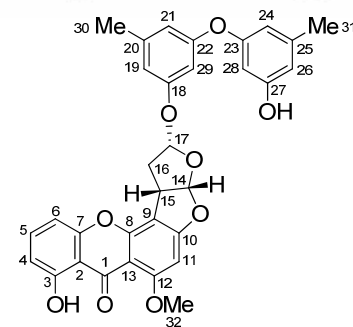

2

S29

## HR-ESIMS for 2

### Generic Display Report

#### Analysis Info

Analysis Name D:\Data\MS\data\202104\renyanxia\_W\_pos\_65\_01\_10385.d  
Method LC\_Direct Infusion\_pos\_70-500mz.m  
Sample Name renyanxia\_W\_pos  
Comment

Acquisition Date 4/1/2021 5:30:07 PM

Operator SCSIO  
Instrument maXis

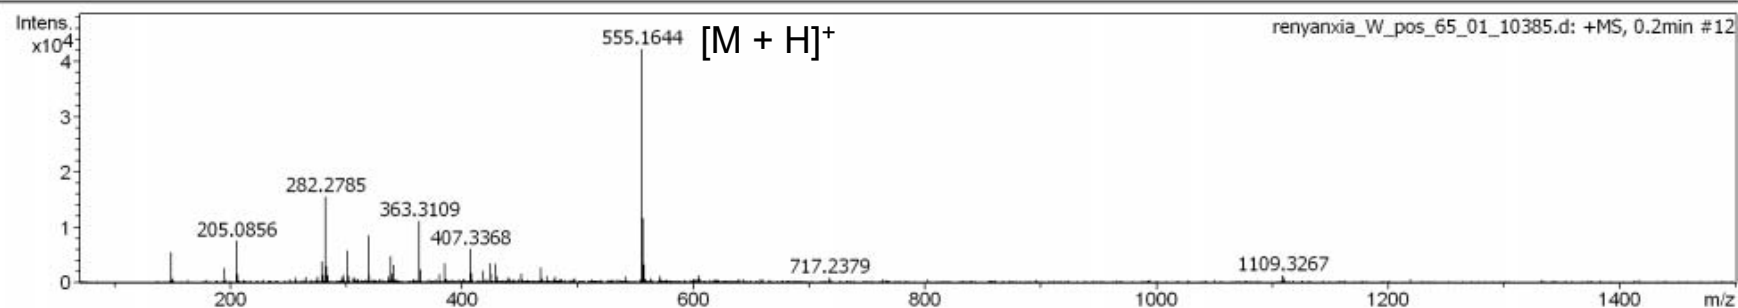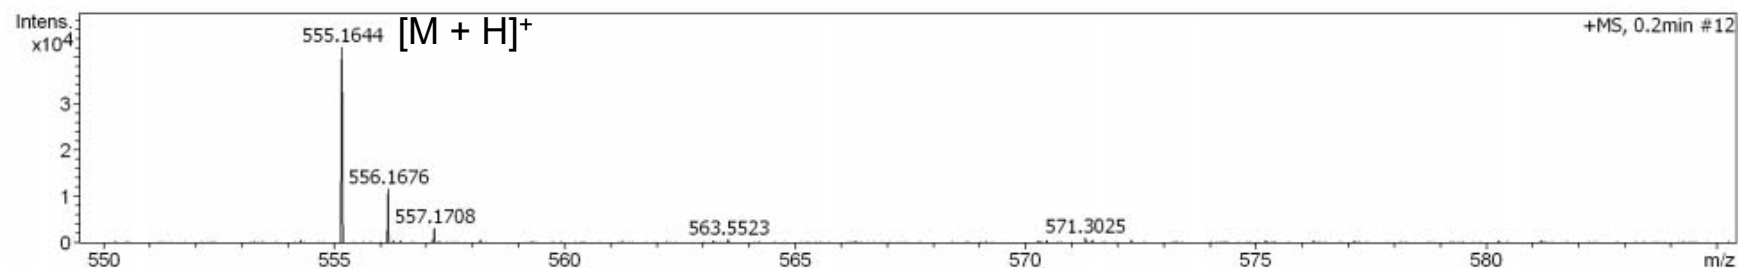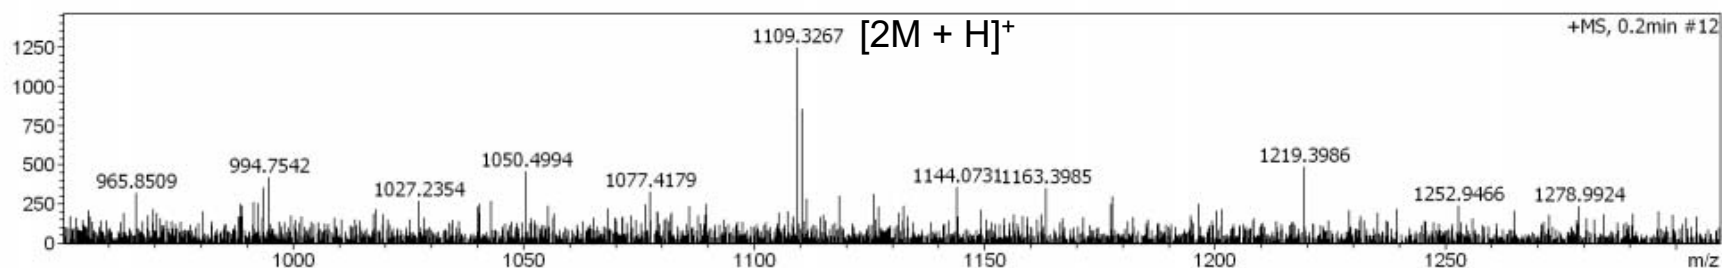

$^1\text{H}$  (700 MHz) NMR spectrum of **2** in  $\text{CDCl}_3$

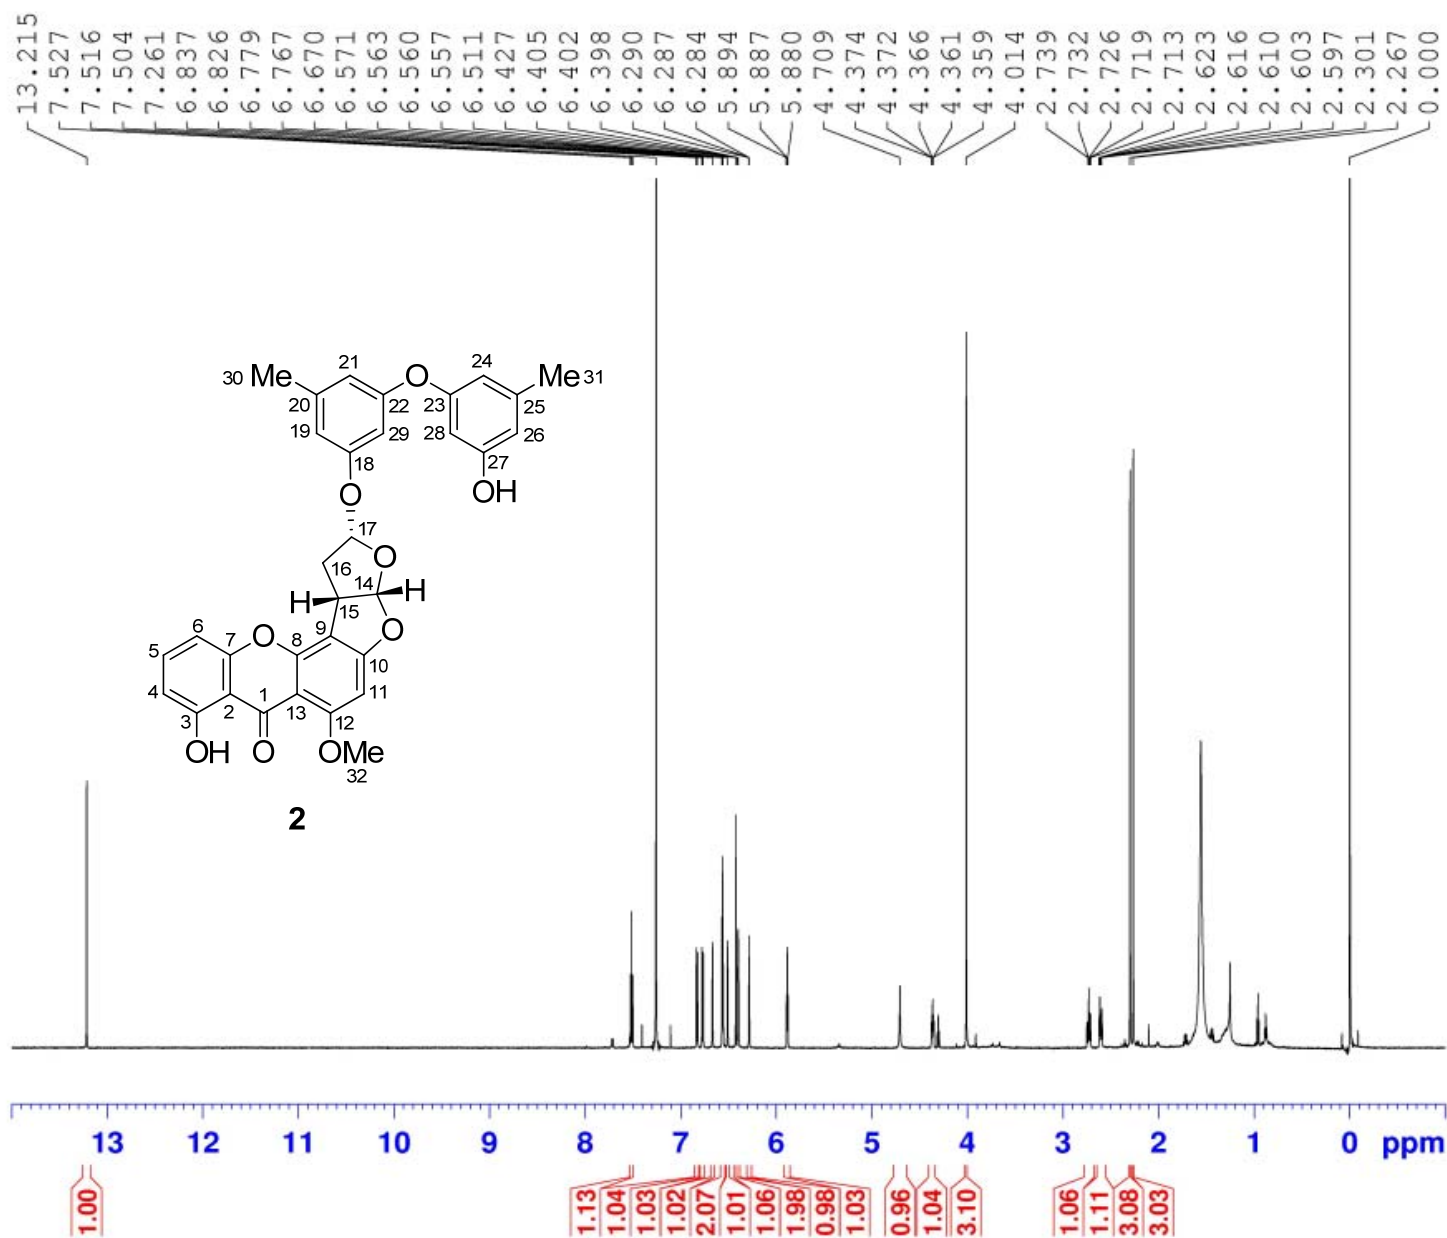

```

NAME      wubibbib-WBB-42-22-9
EXPNO     10
PROCNO    1
Date_     20210207
Time      15.25 h
INSTRUM   spect
PROBHD    Z120187_0028 (
PULPROG   zg30
TD         65536
SOLVENT   CDCl3
NS         8
DS         2
SWH        14097.744 Hz
FIDRES     0.430229 Hz
AQ         2.3243935 sec
RG         4.87
DW         35.467 usec
DE         10.00 usec
TE         298.0 K
D1         1.00000000 sec
TD0        1
SFO1       700.1849013 MHz
NUC1       1H
P1         7.55 usec
SI         65536
SF         700.1800174 MHz
WDW        EM
SSB        0
LB         0.30 Hz
GB         0
PC         1.00
    
```

$^1\text{H}$  (700 MHz) NMR spectrum of **2** in  $\text{CDCl}_3$

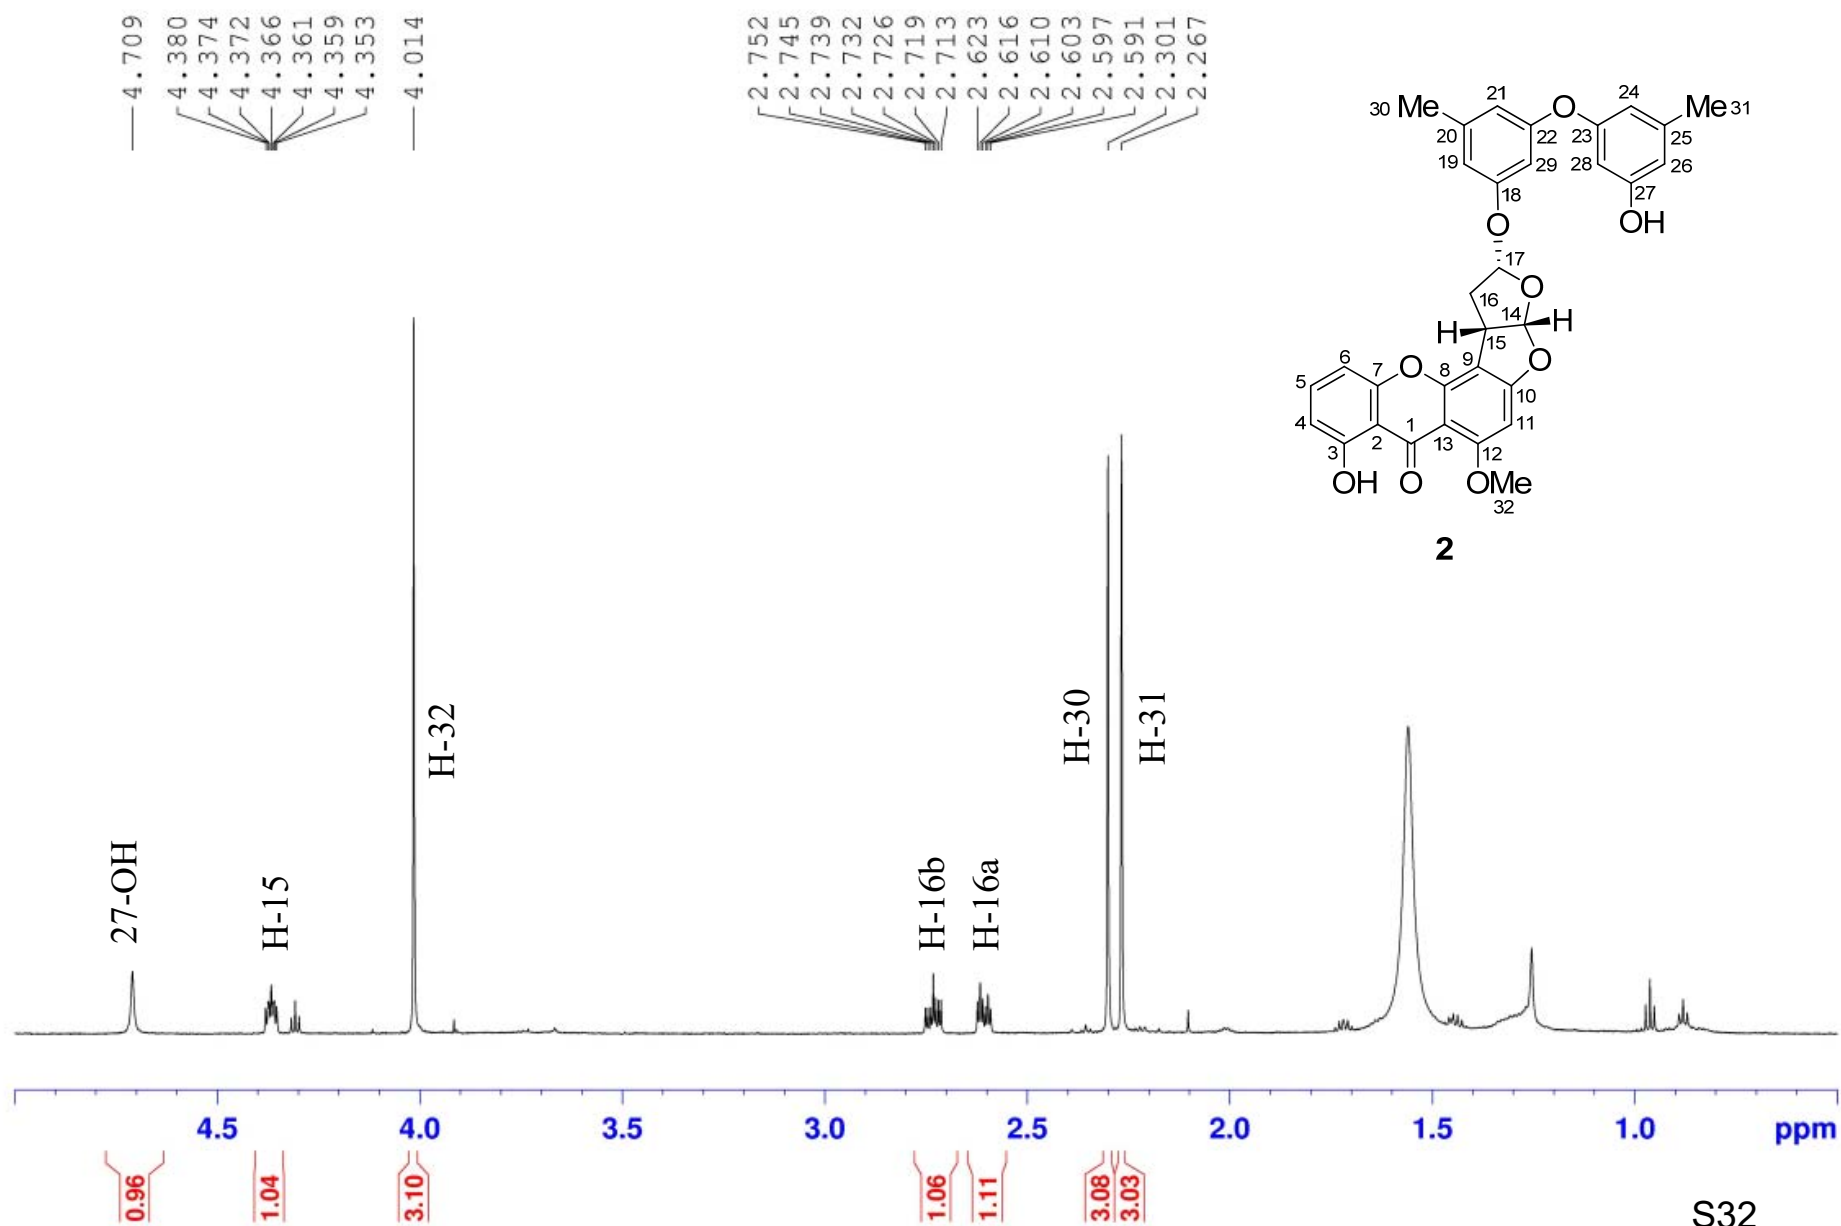



$^1\text{H}$  (700 MHz) NMR spectrum of **2** in  $\text{CDCl}_3$

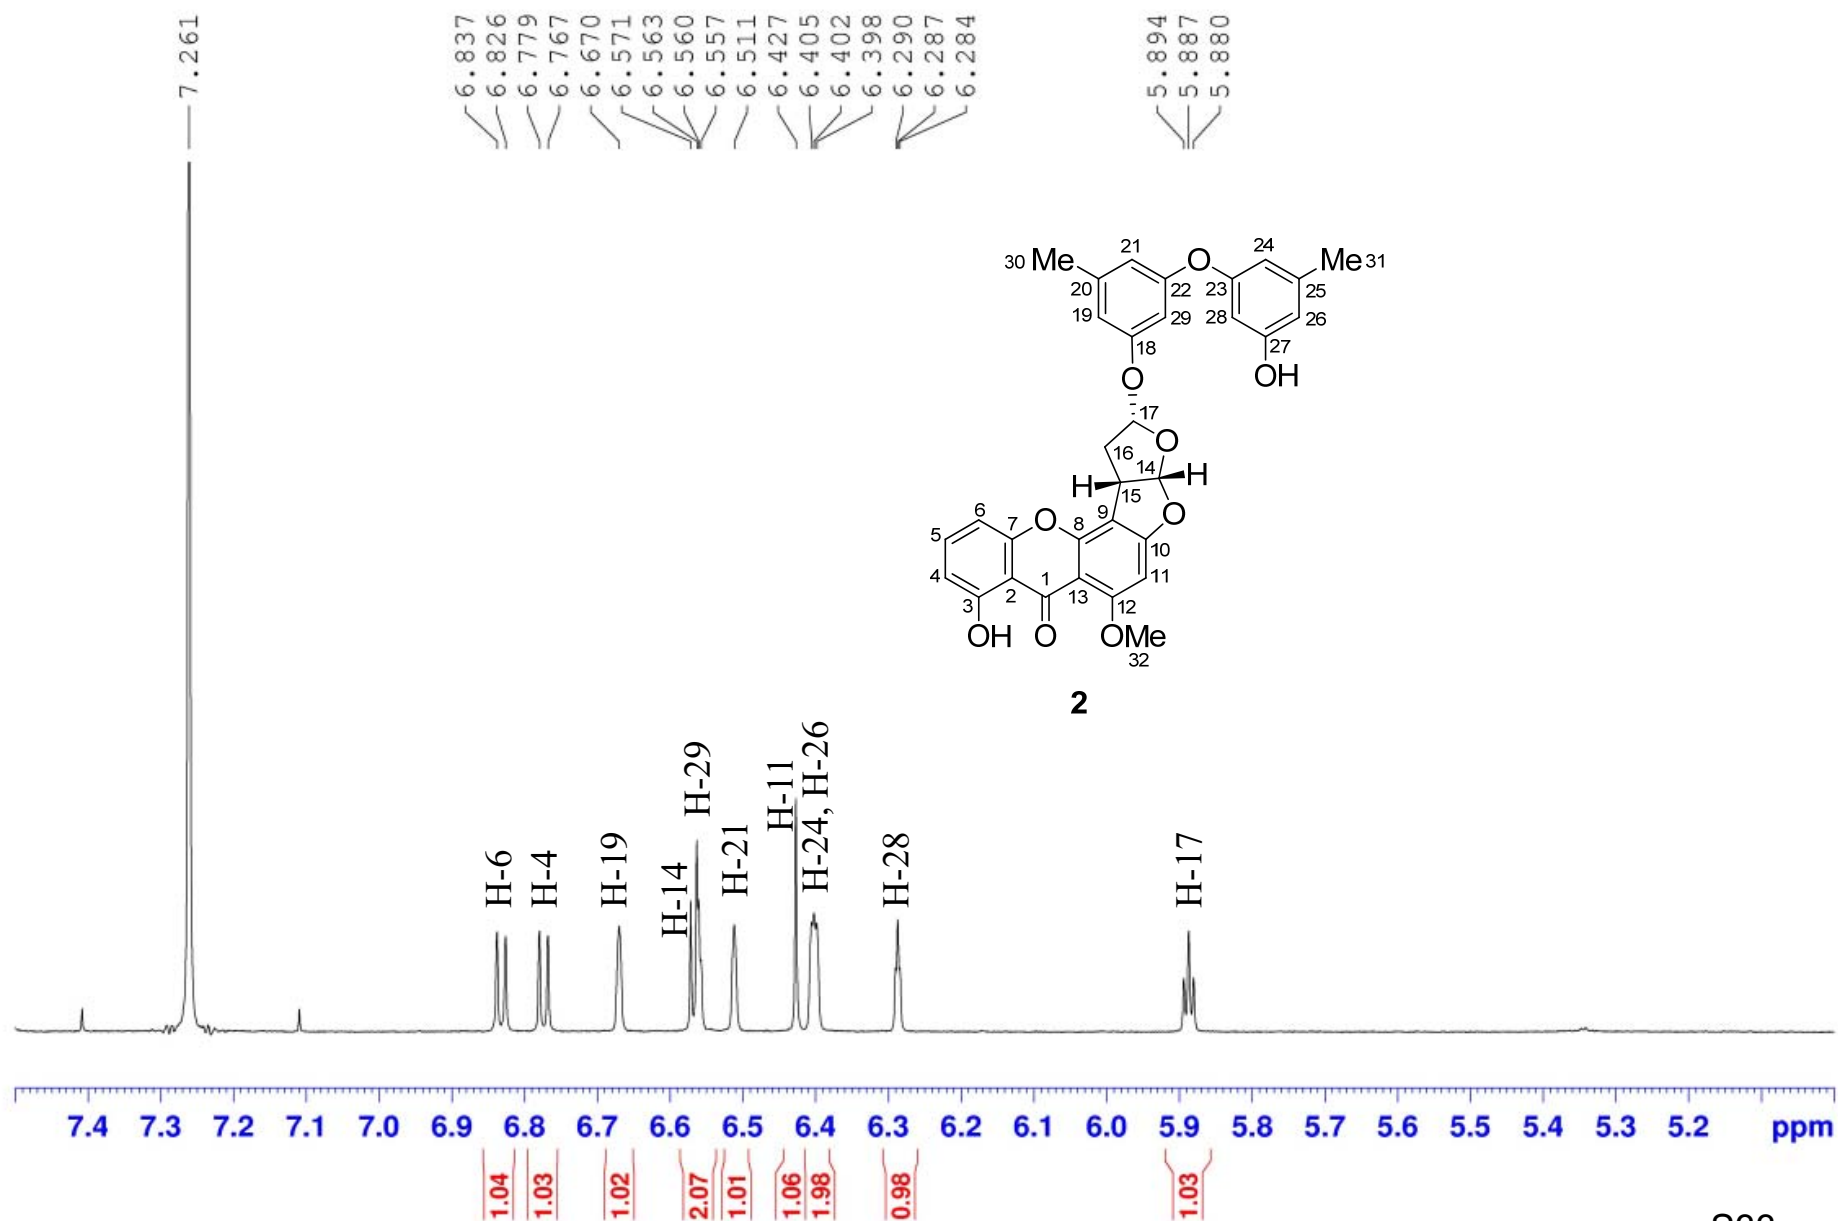



$^1\text{H}$  (700 MHz) NMR spectrum of **2** in  $\text{CDCl}_3$

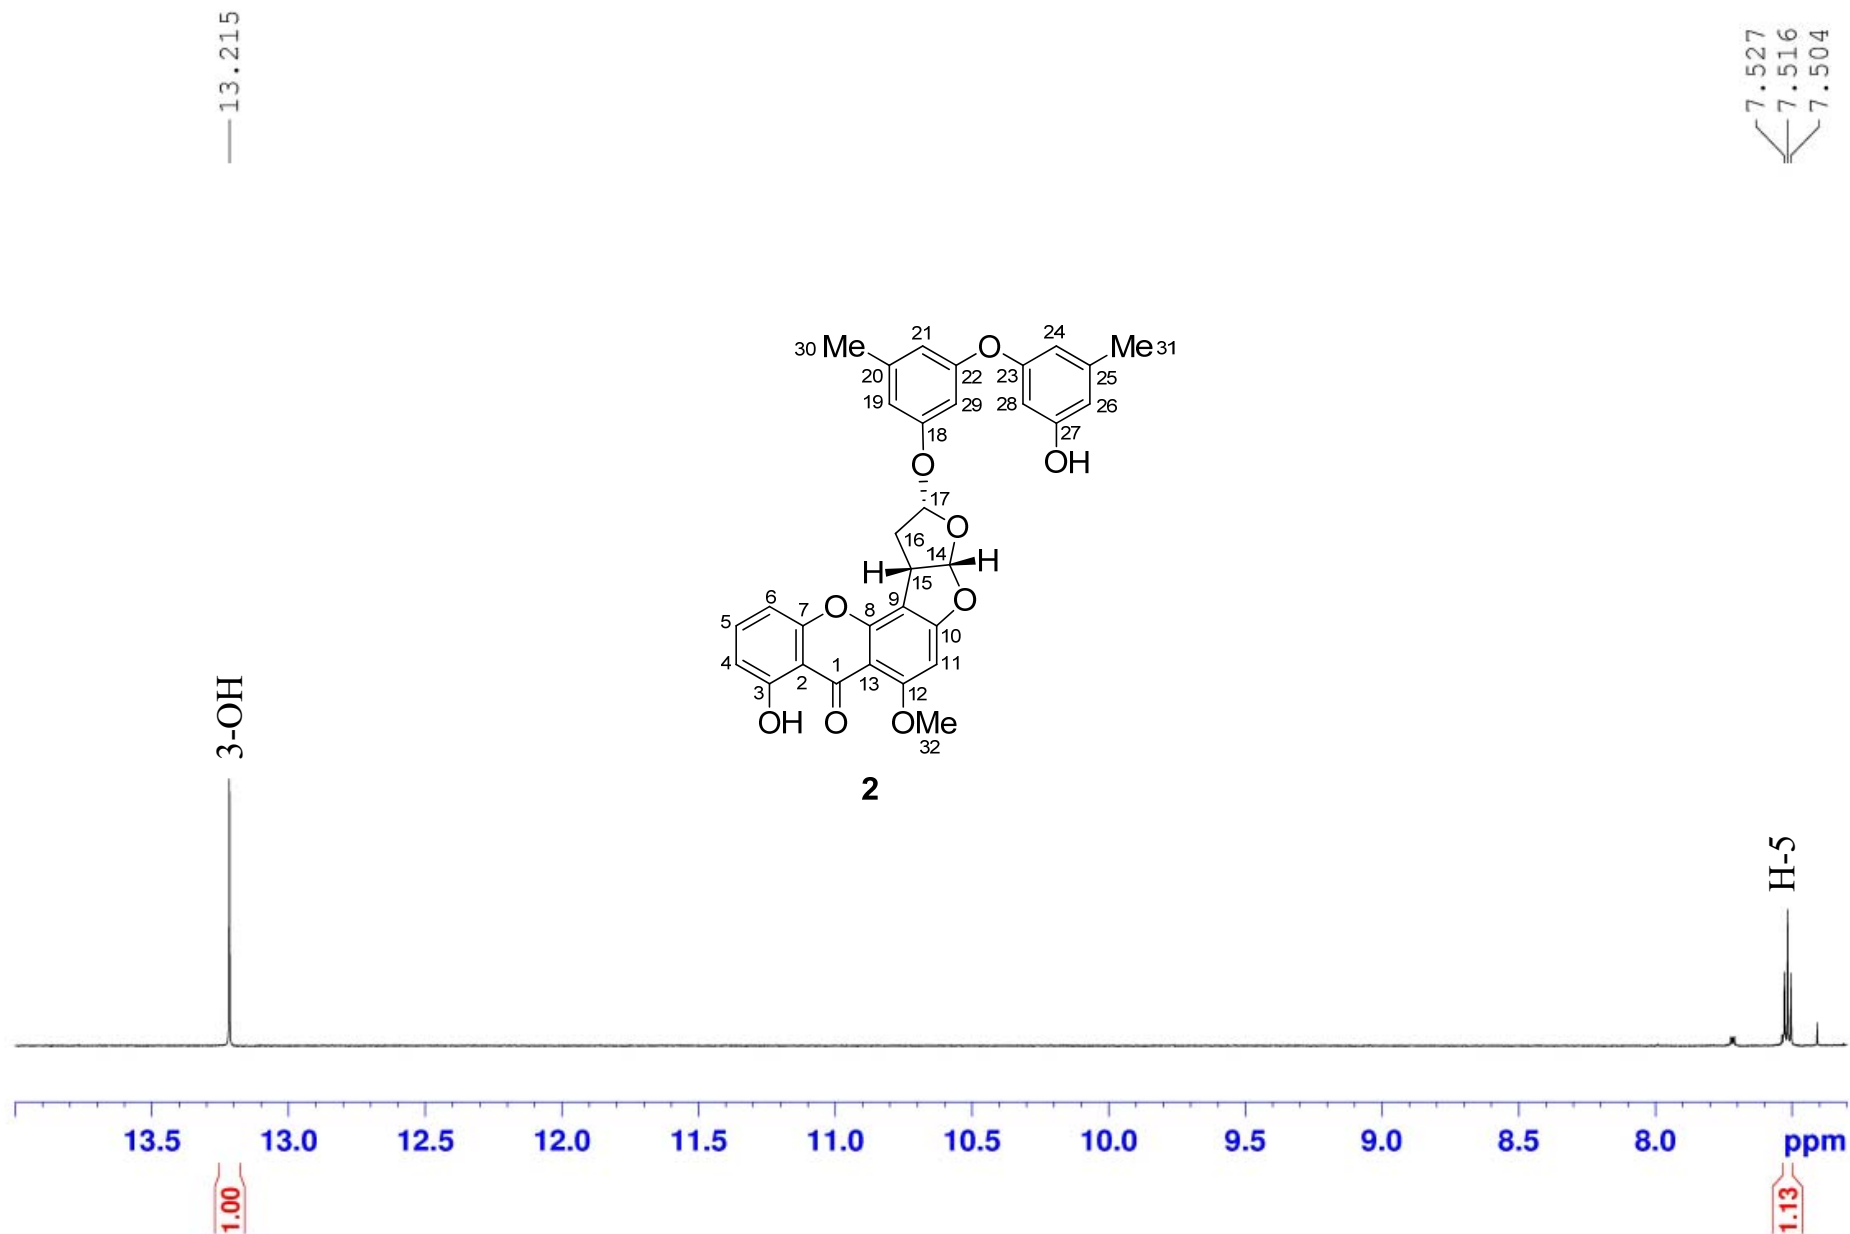

$^{13}\text{C}$  (175 MHz) NMR spectrum of **2** in  $\text{CDCl}_3$

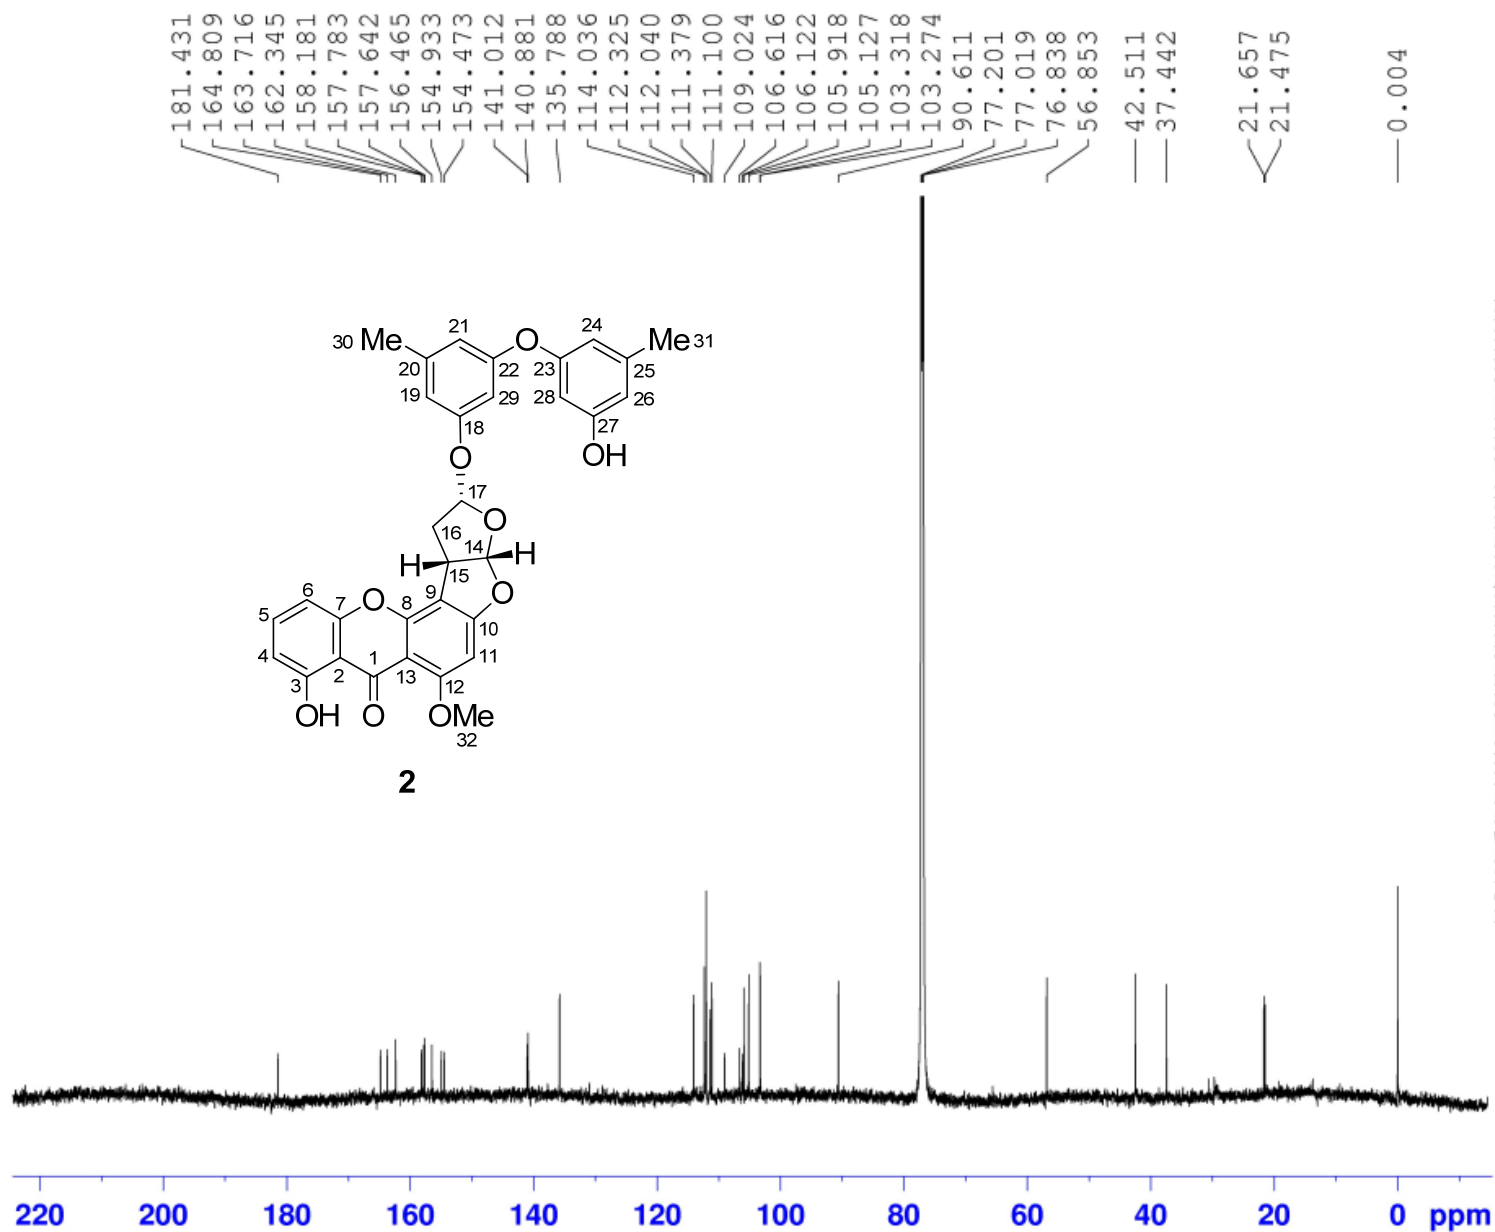

```

NAME      wubibbib-WBB-42-22-9
EXPNO     11
PROCNO    1
Date_     20210207
Time      18.14 h
INSTRUM    spect
PROBHD     z120187_0028 (
PULPROG    zgpg30
TD         32768
SOLVENT    CDCl3
NS         7000
DS         8
SWH        43859.648 Hz
FIDRES     2.676980 Hz
AQ         0.3736052 sec
RG         181.26
DW         11.400 usec
DE         18.00 usec
TE         298.0 K
D1         1.00000000 sec
D11        0.03000000 sec
TD0        1
SFO1       176.0797677 MHz
NUC1       13C
P1         11.90 usec
SI         32768
SF         176.0604019 MHz
WDW        EM
SSB        0
LB         3.00 Hz
GB         0
PC         1.40
    
```

$^{13}\text{C}$  (175 MHz) NMR spectrum of **2** in  $\text{CDCl}_3$

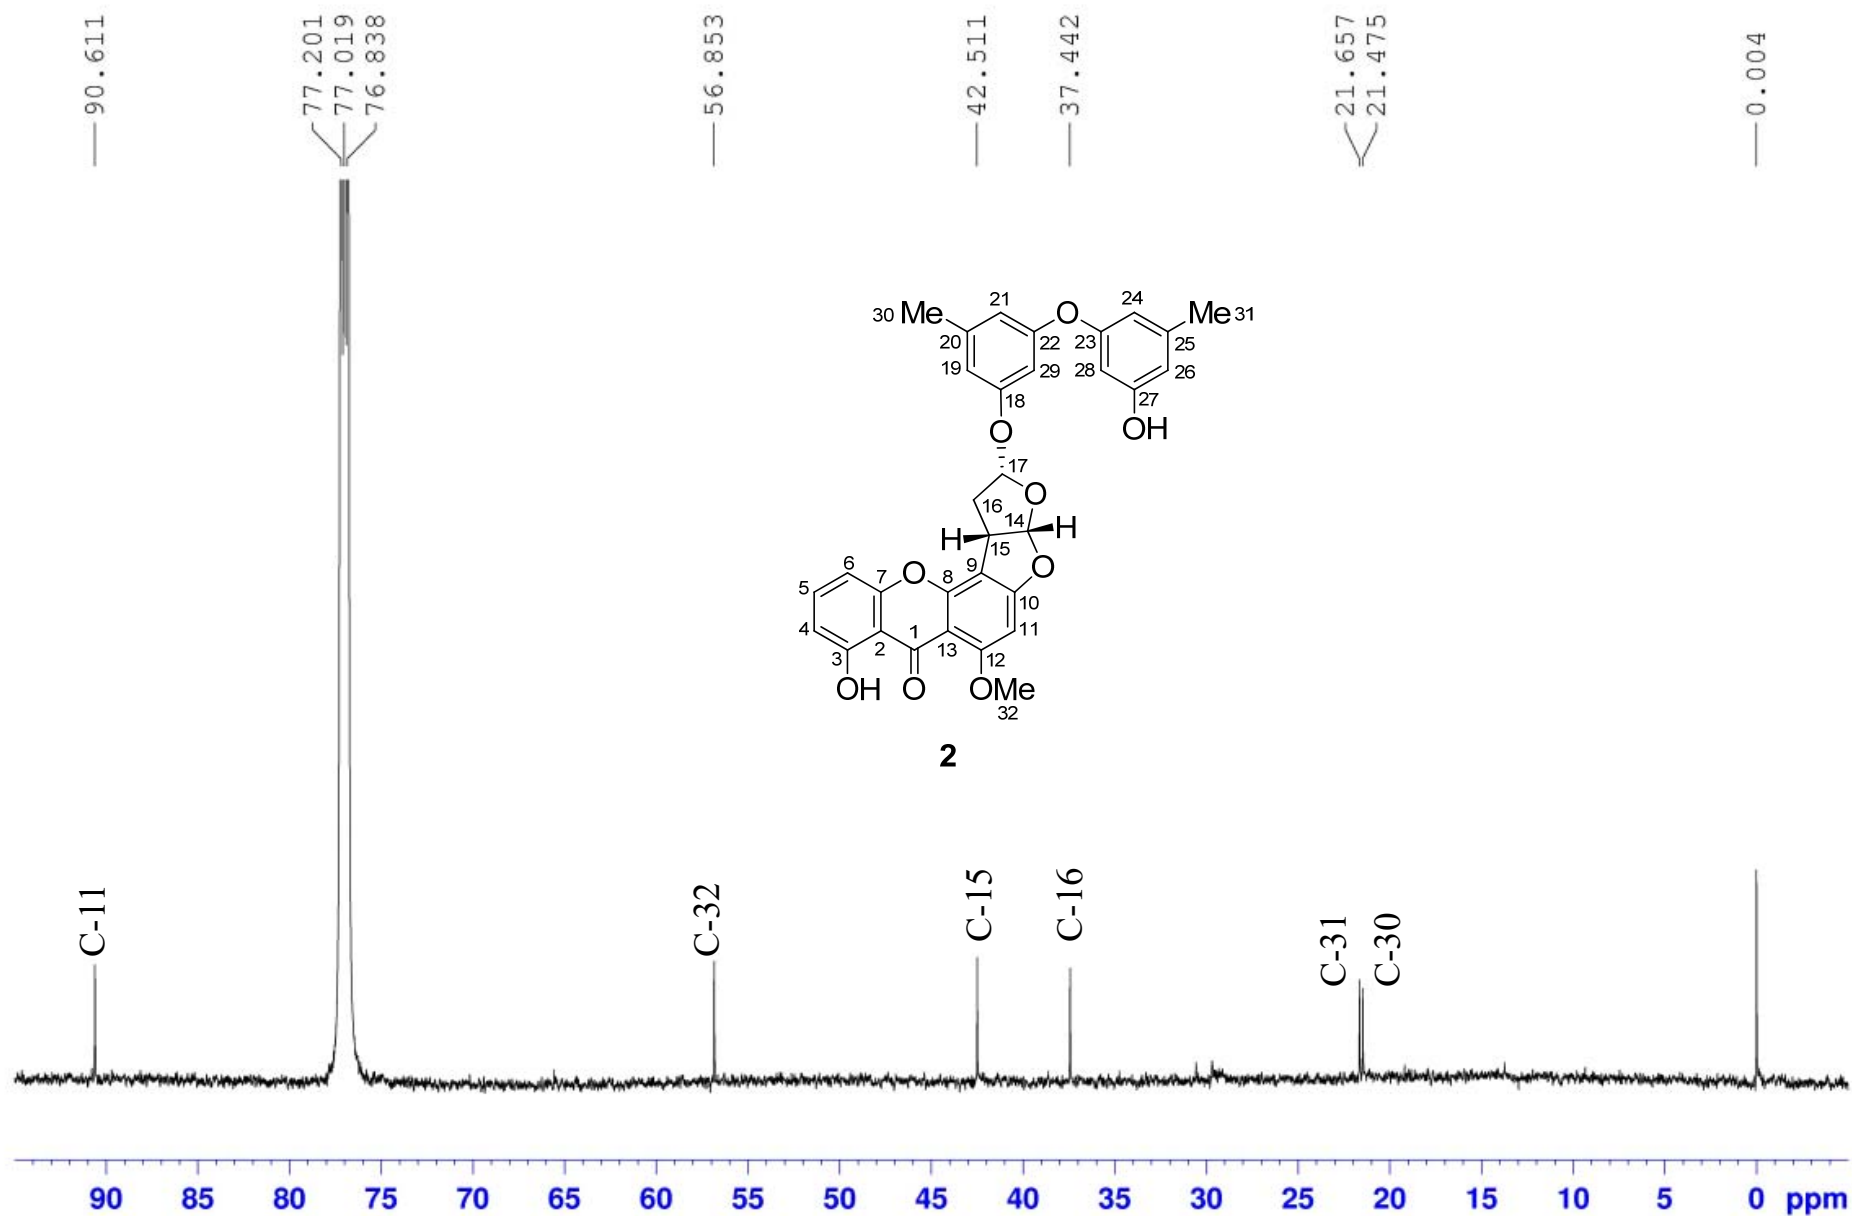

$^{13}\text{C}$  (175 MHz) NMR spectrum of **2** in  $\text{CDCl}_3$

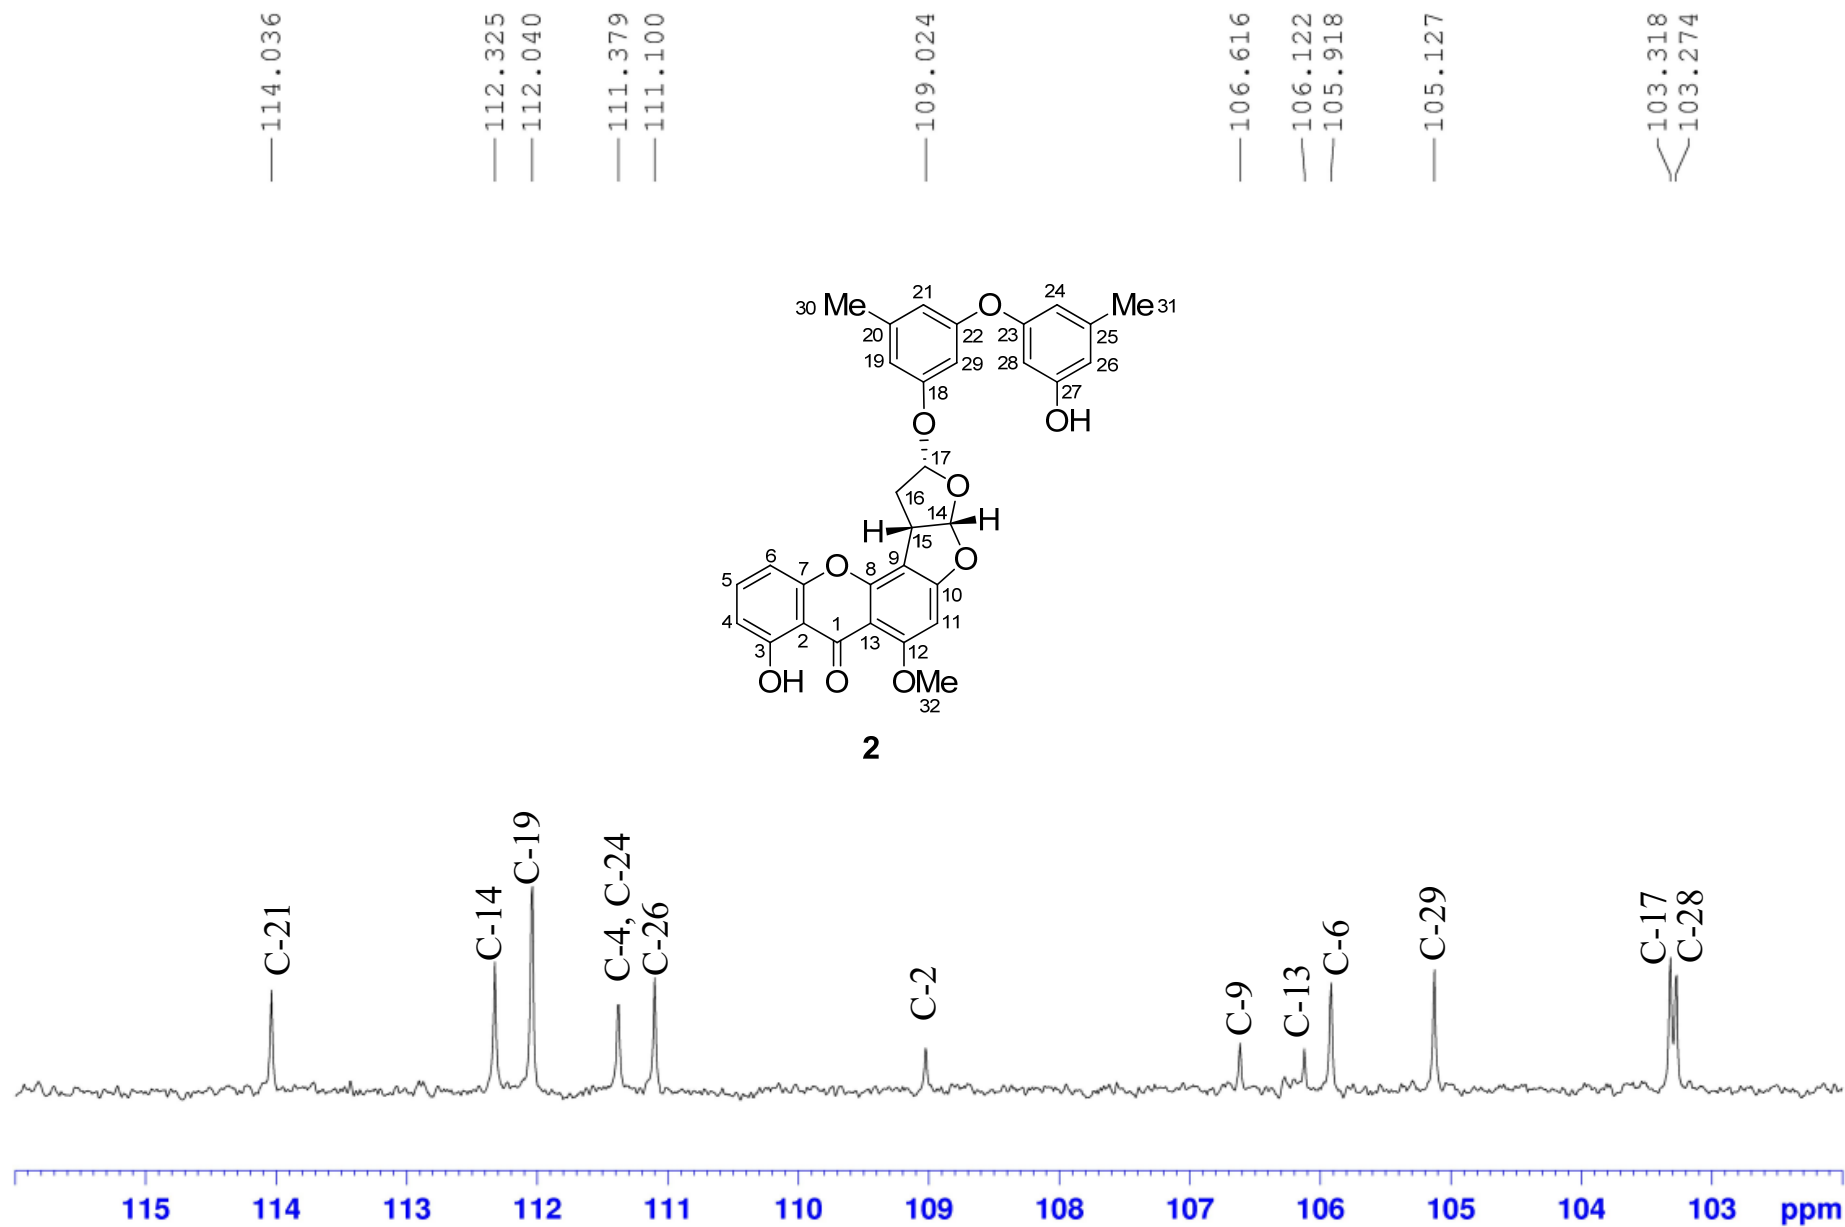

$^{13}\text{C}$  (175 MHz) NMR spectrum of **2** in  $\text{CDCl}_3$

158.181  
157.783  
157.642

156.465

154.933  
154.473

141.012  
140.881

135.788

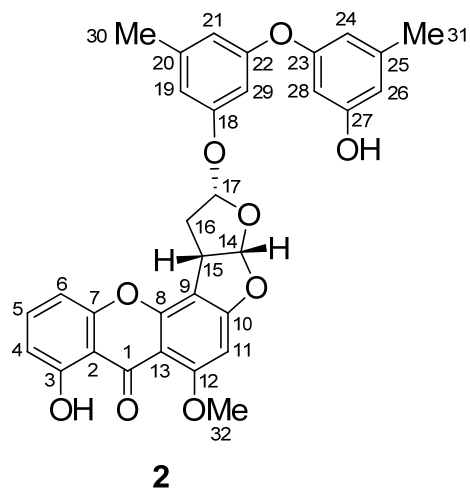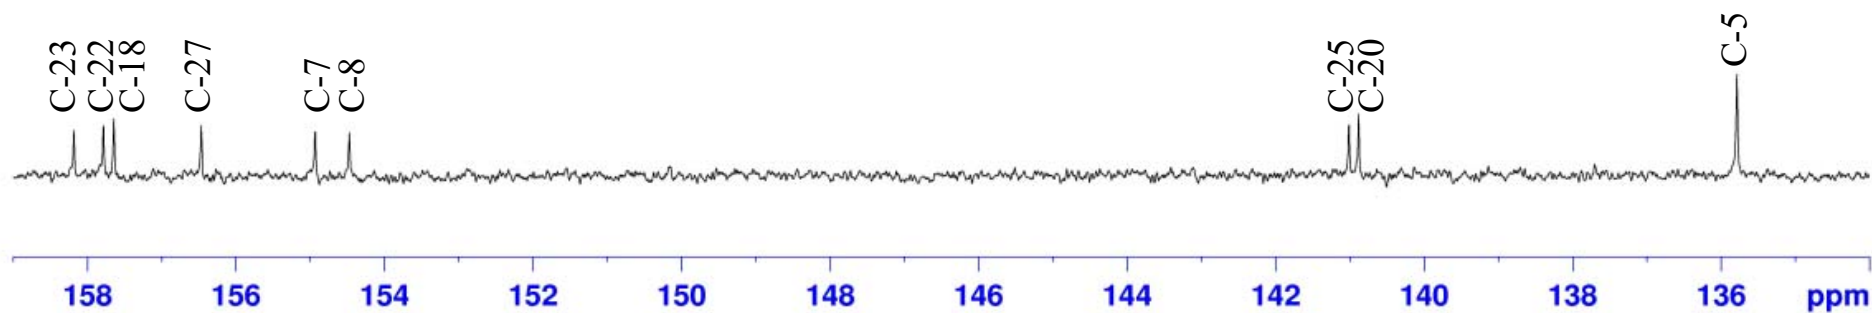

$^{13}\text{C}$  (175 MHz) NMR spectrum of **2** in  $\text{CDCl}_3$

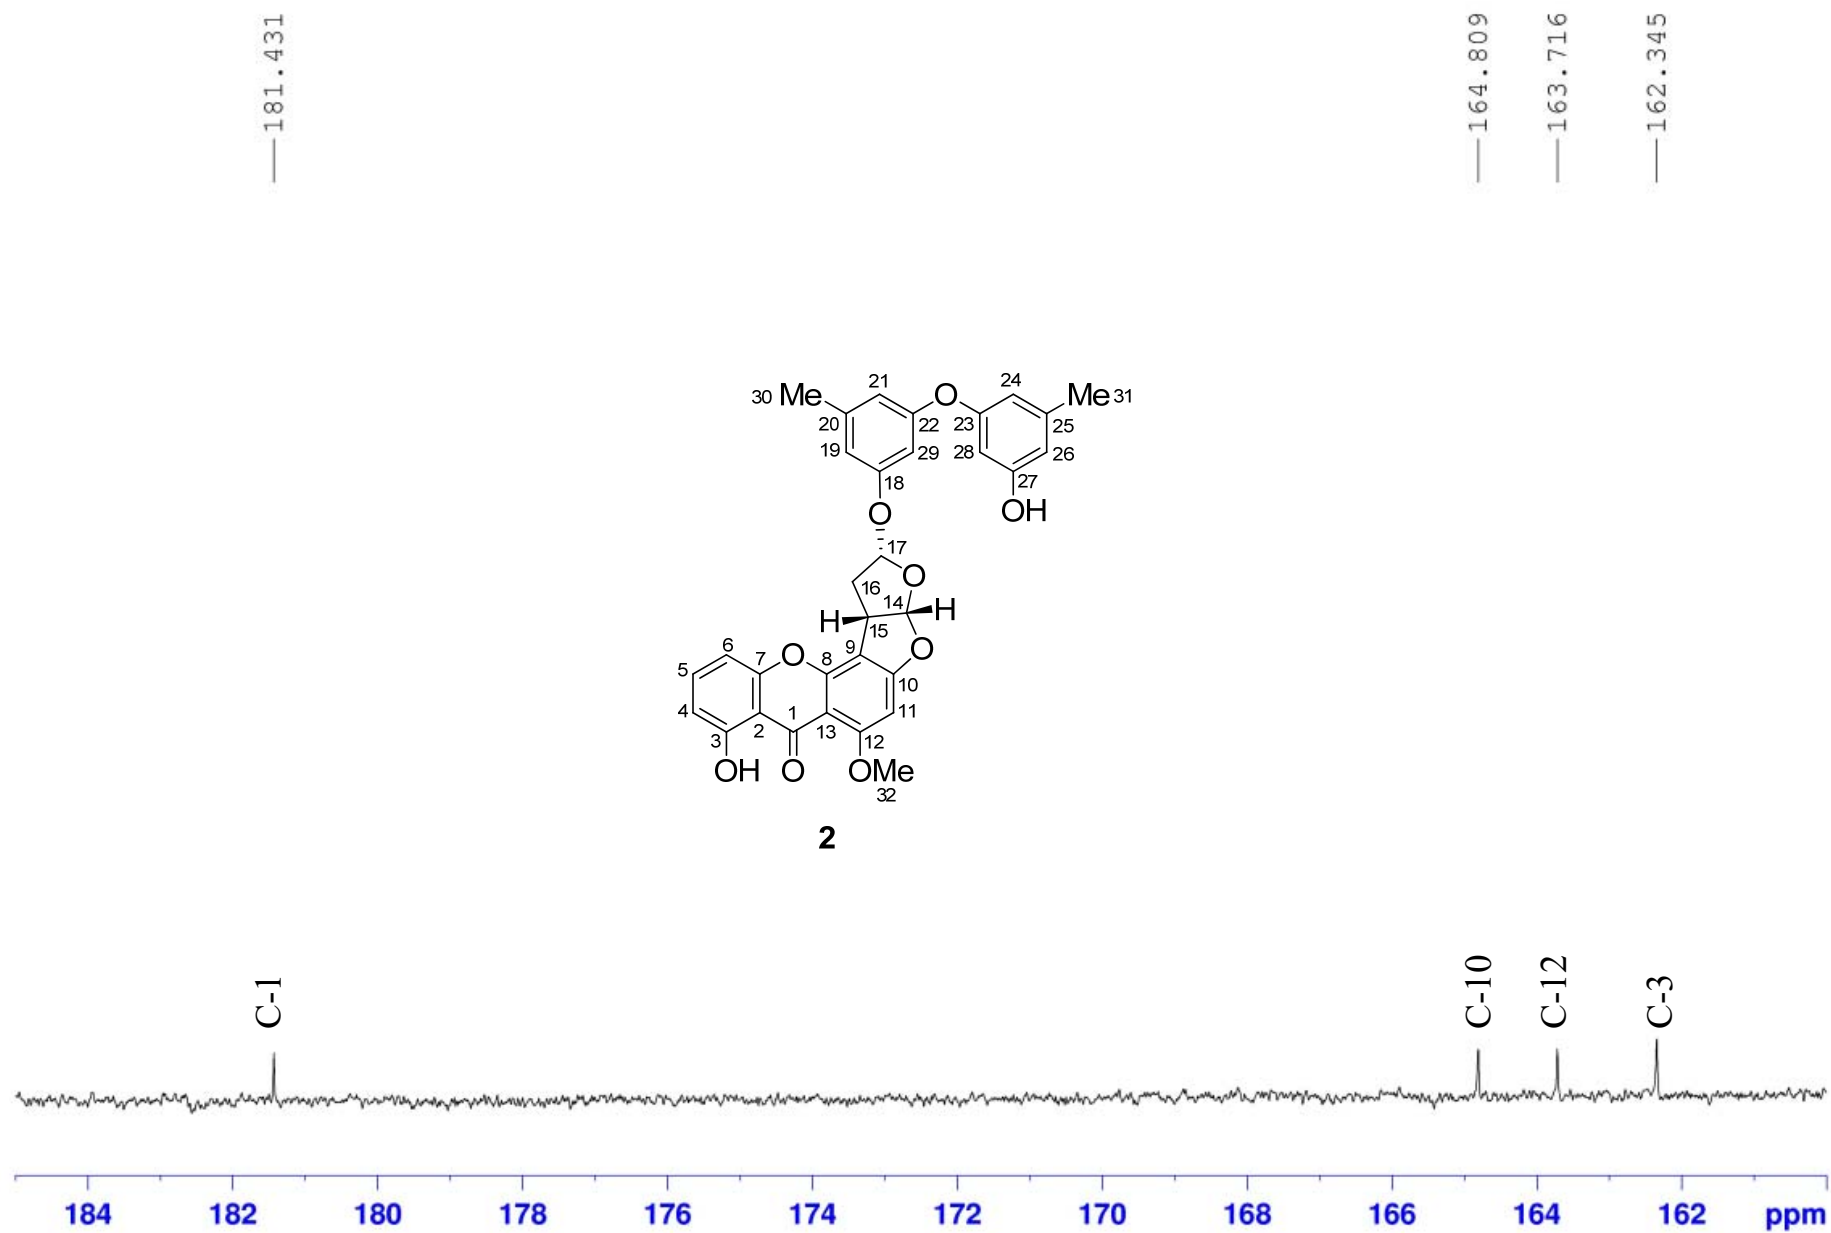

DEPT135 (175 MHz) spectrum of **2** in CDCl<sub>3</sub>

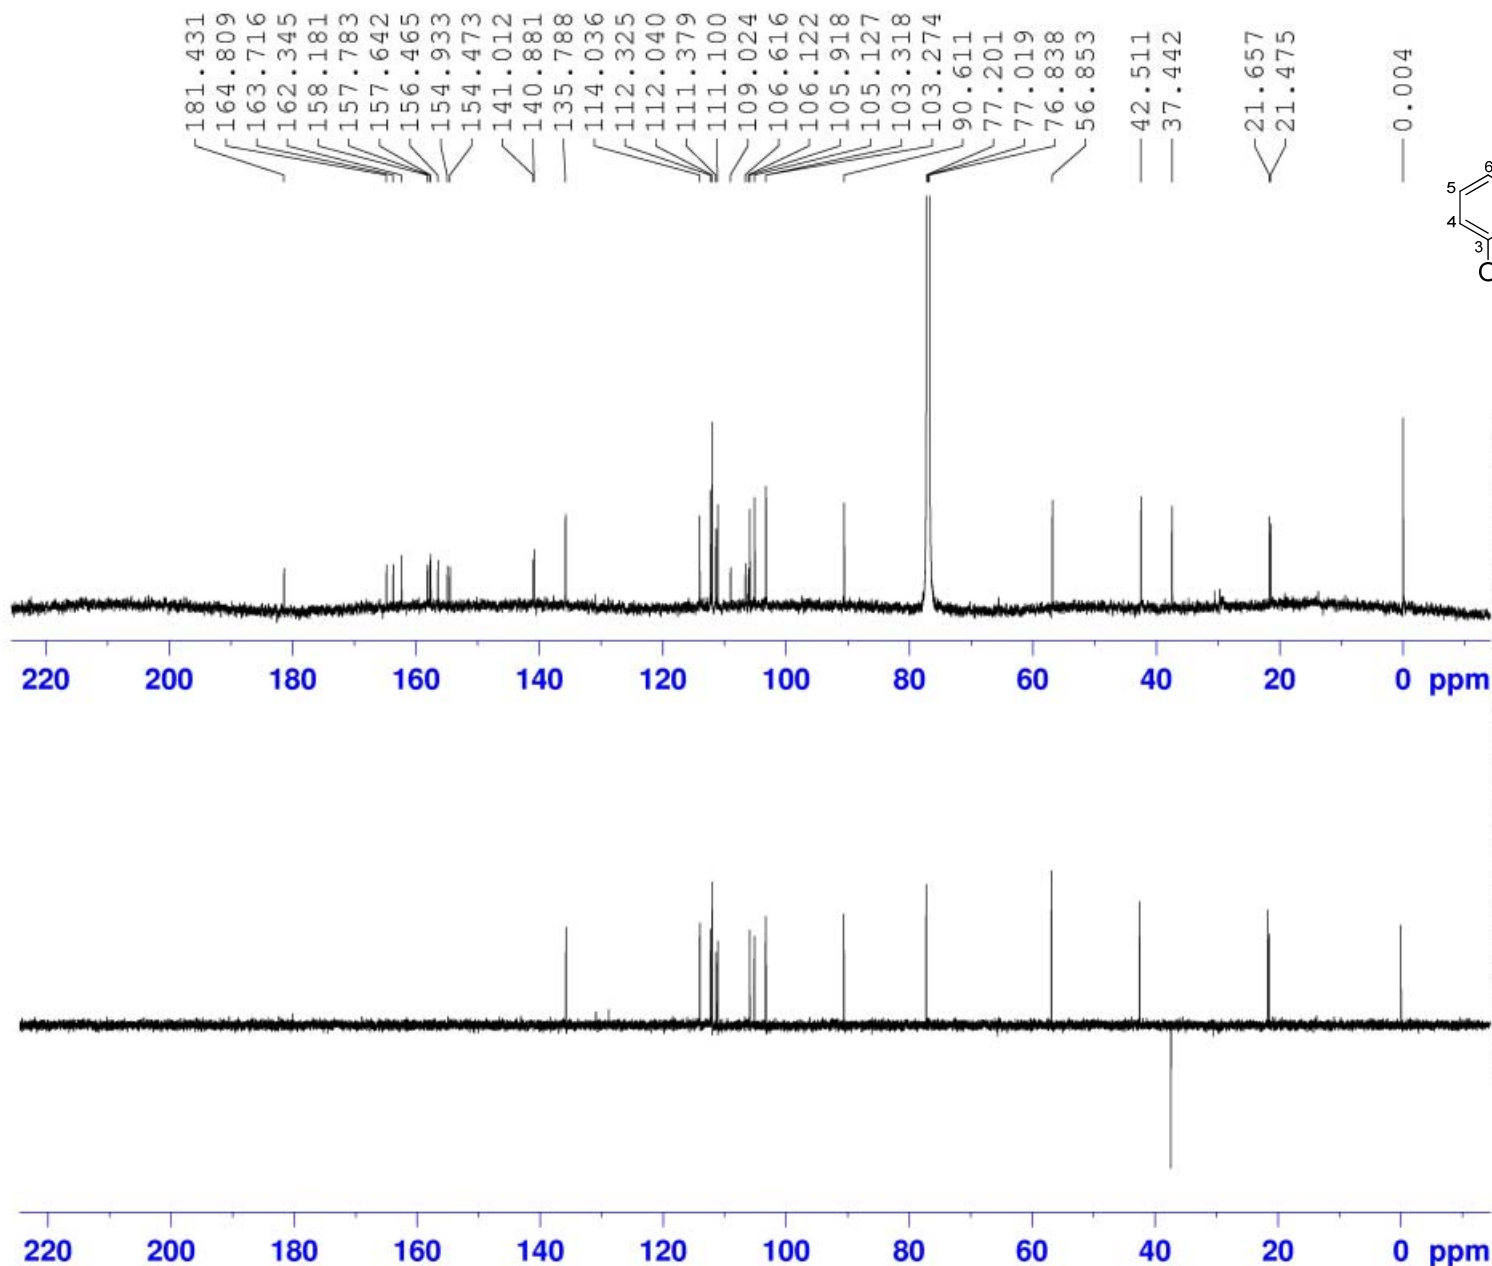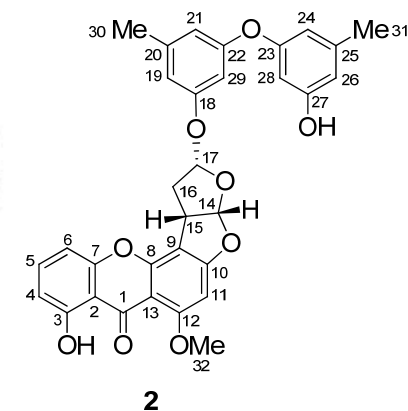

```

NAME      wubibbib-WBB-42-22-9
EXPNO     12
PROCNO    1
Date_     20210207
Time      19.38 h
INSTRUM    spect
PROBHD     Z120187_0028 (
PULPROG    deptspl35
TD         32768
SOLVENT     CDCl3
NS         3500
DS          8
SWH        43859.648 Hz
FIDRES     2.676980 Hz
AQ         0.3736052 sec
RG         181.26
DW         11.400 usec
DE         18.00 usec
TE         298.0 K
CNST2      145.000000
D1         1.00000000 sec
D2         0.00344828 sec
D12        0.00002000 sec
TD0        1
SF01       176.0797677 MHz
NUC1       13C
P1         11.90 usec
P13        2000.00 usec
SI         32768
SF         176.0604026 MHz
WDW        EM
SSB        0
LB         1.00 Hz
GB         0
PC         1.40
    
```

DEPT135 (175 MHz) spectrum of **2** in CDCl<sub>3</sub>

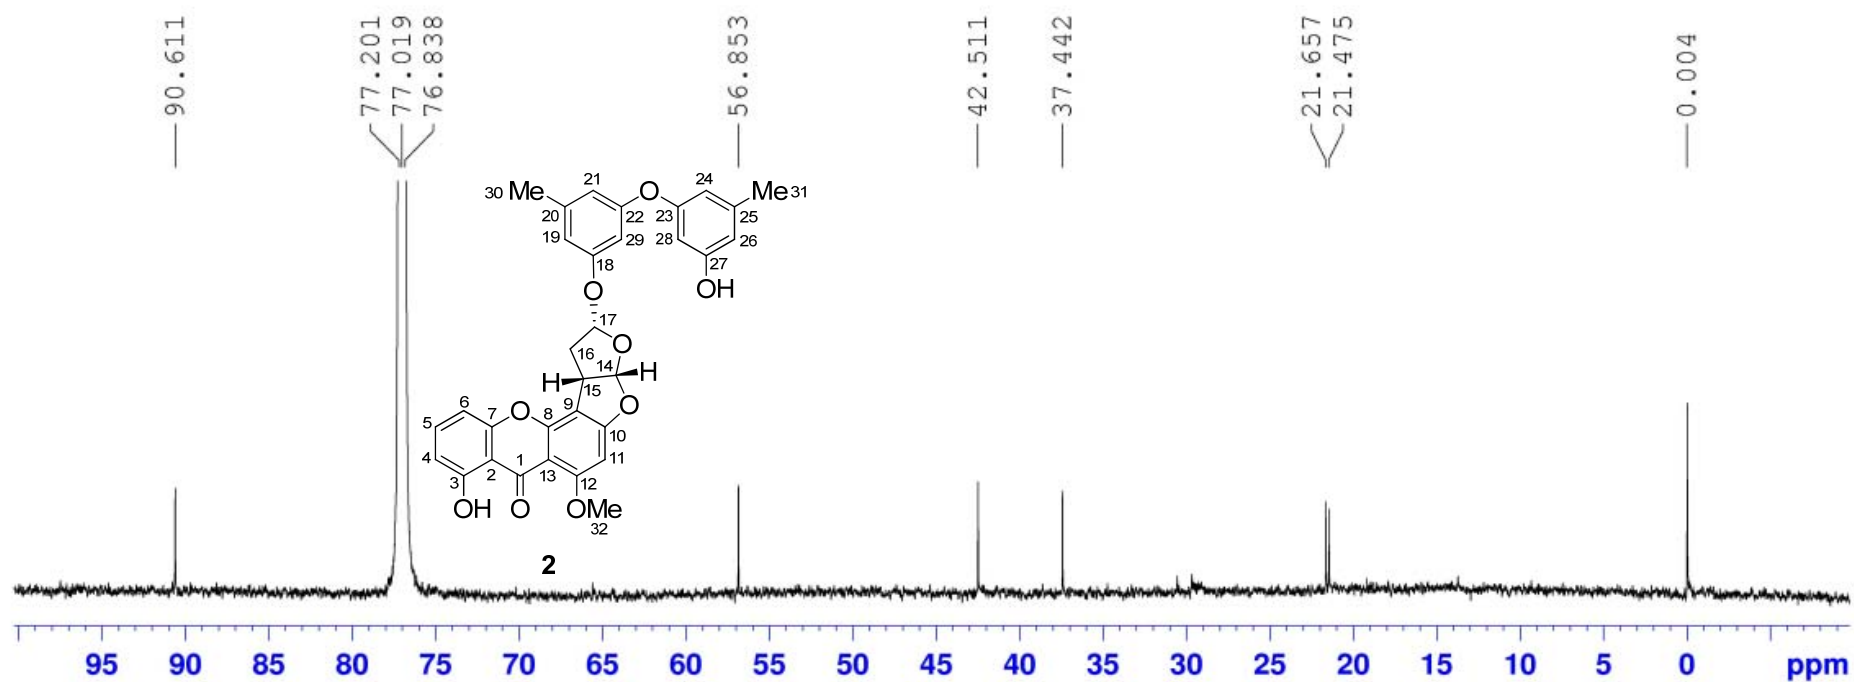

S41

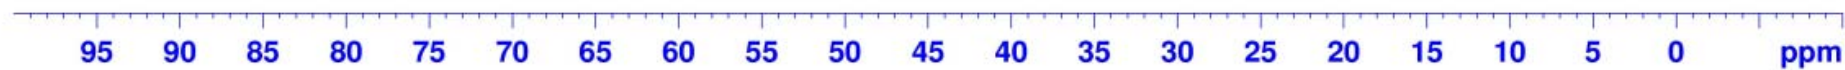



DEPT135 (175 MHz) spectrum of **2** in CDCl<sub>3</sub>

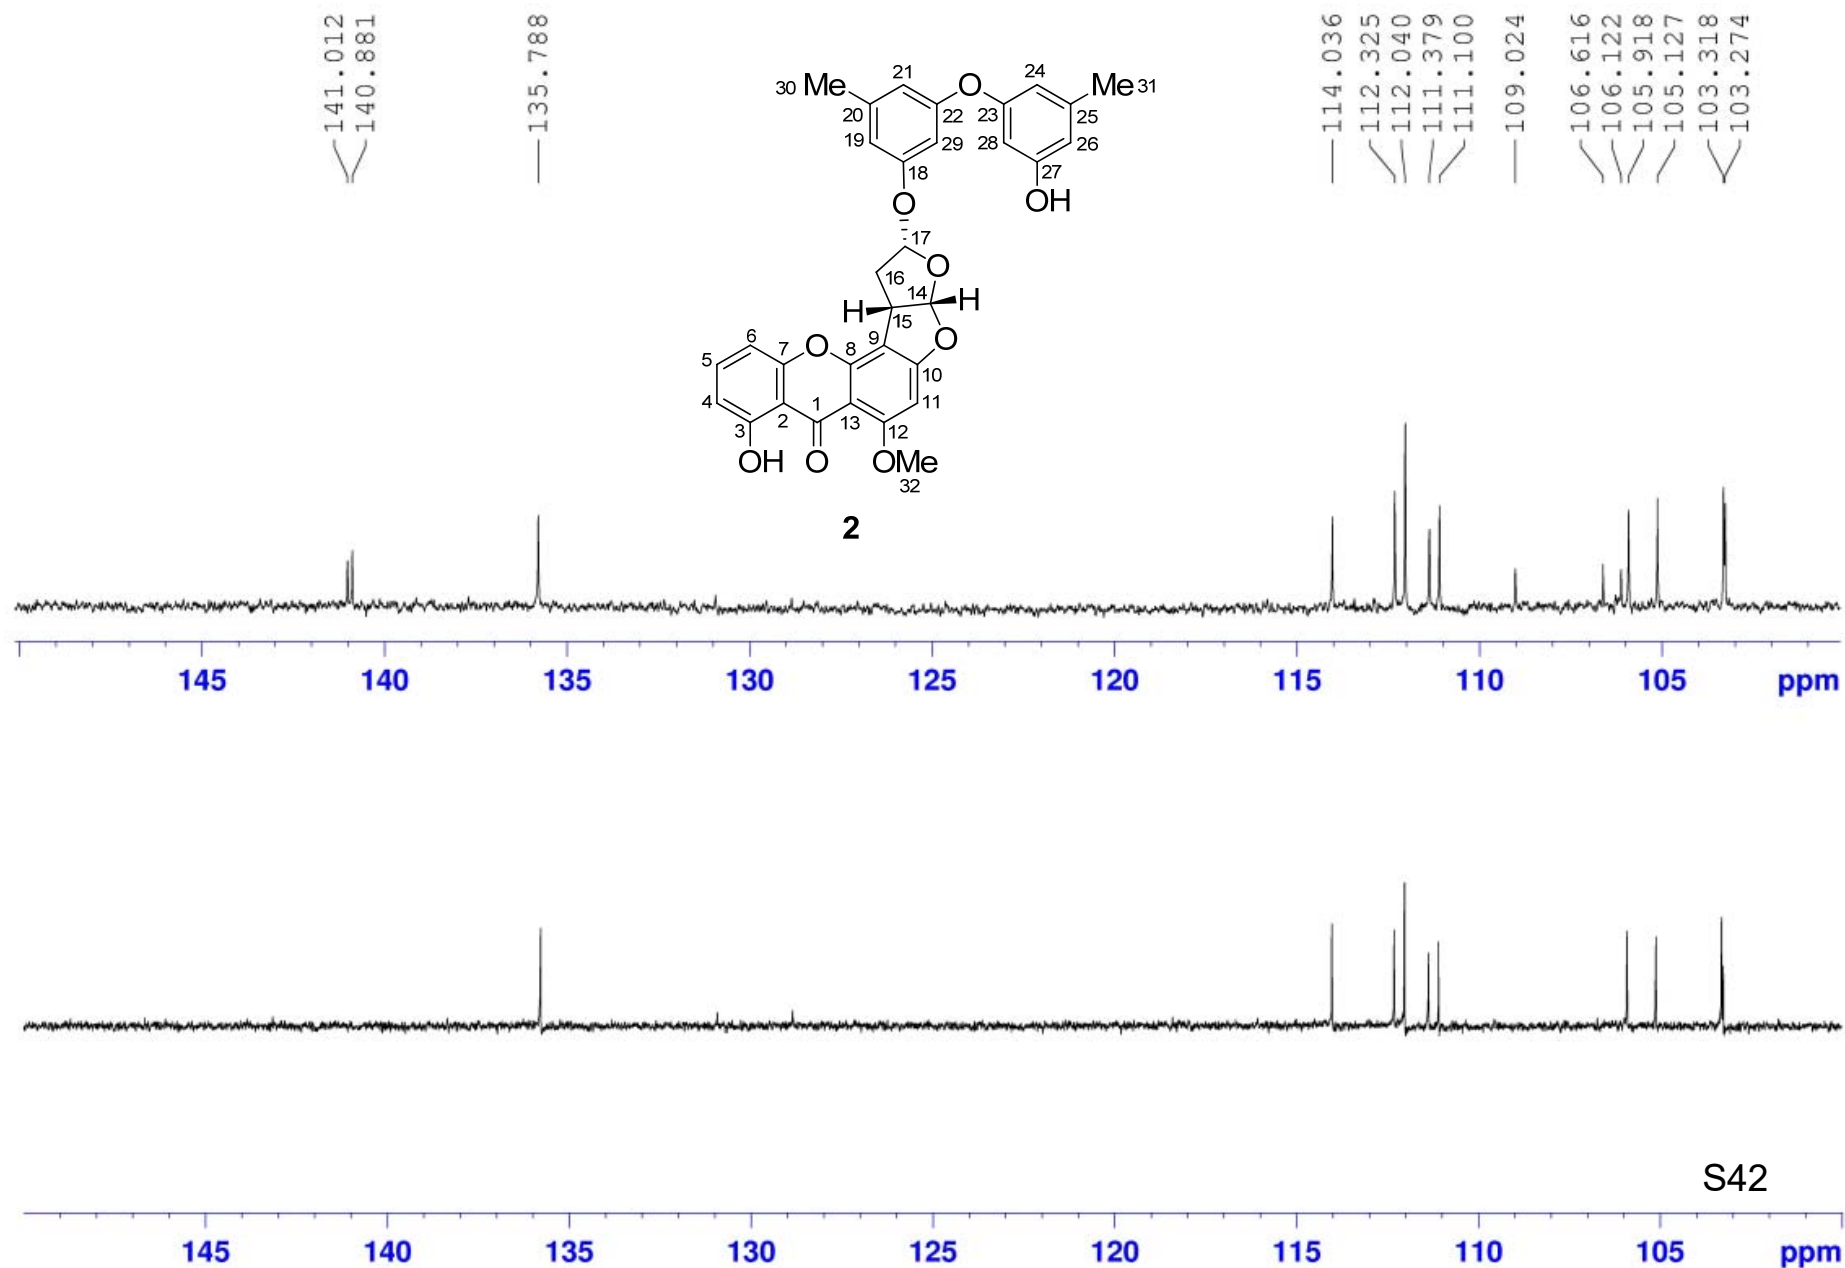

DEPT135 (175 MHz) spectrum of **2** in CDCl<sub>3</sub>

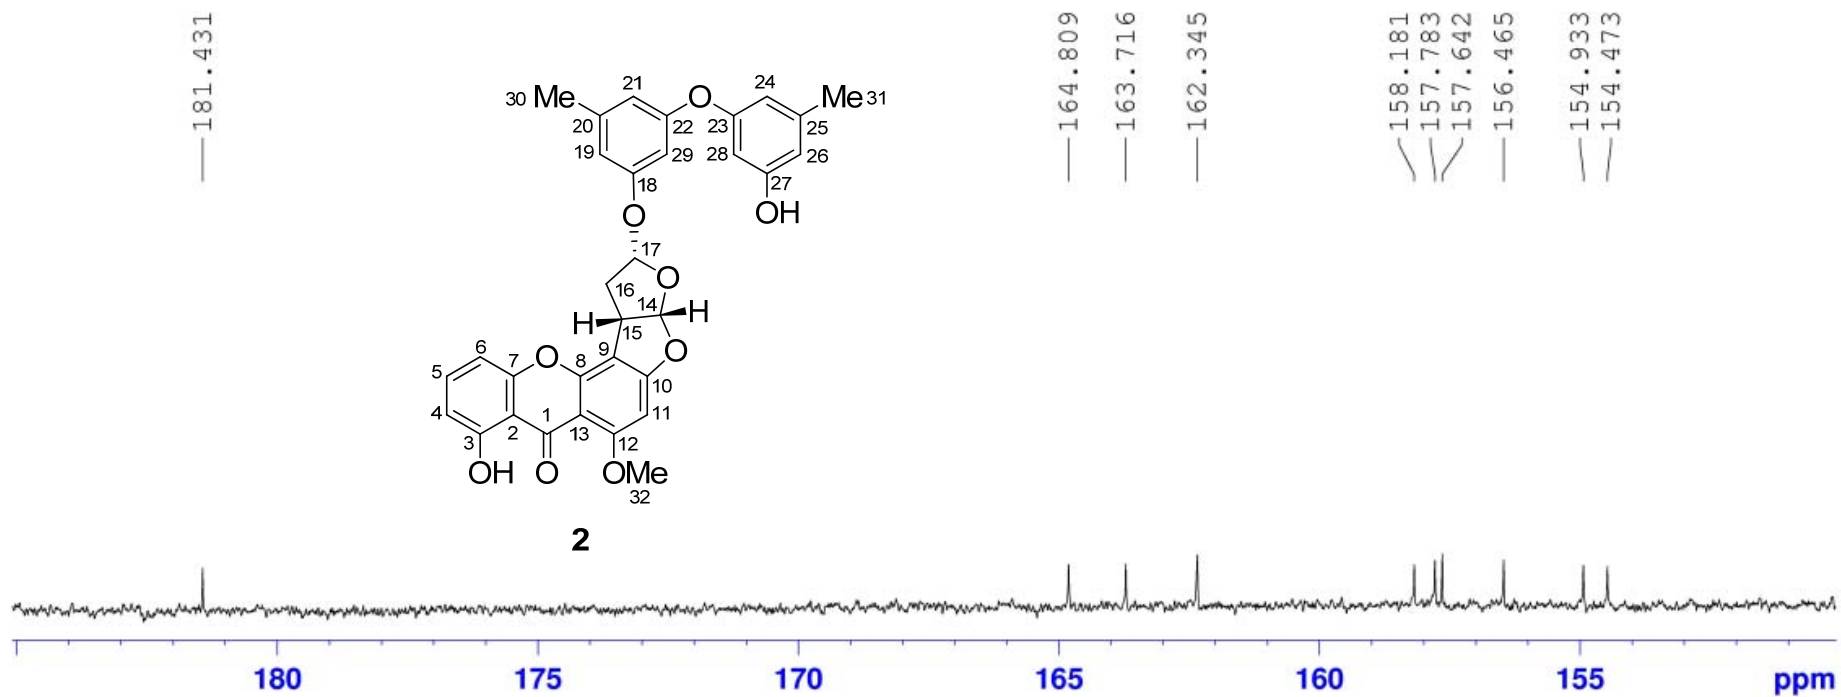

$^1\text{H}$ - $^1\text{H}$  COSY (700 MHz) spectrum of **2** in  $\text{CDCl}_3$

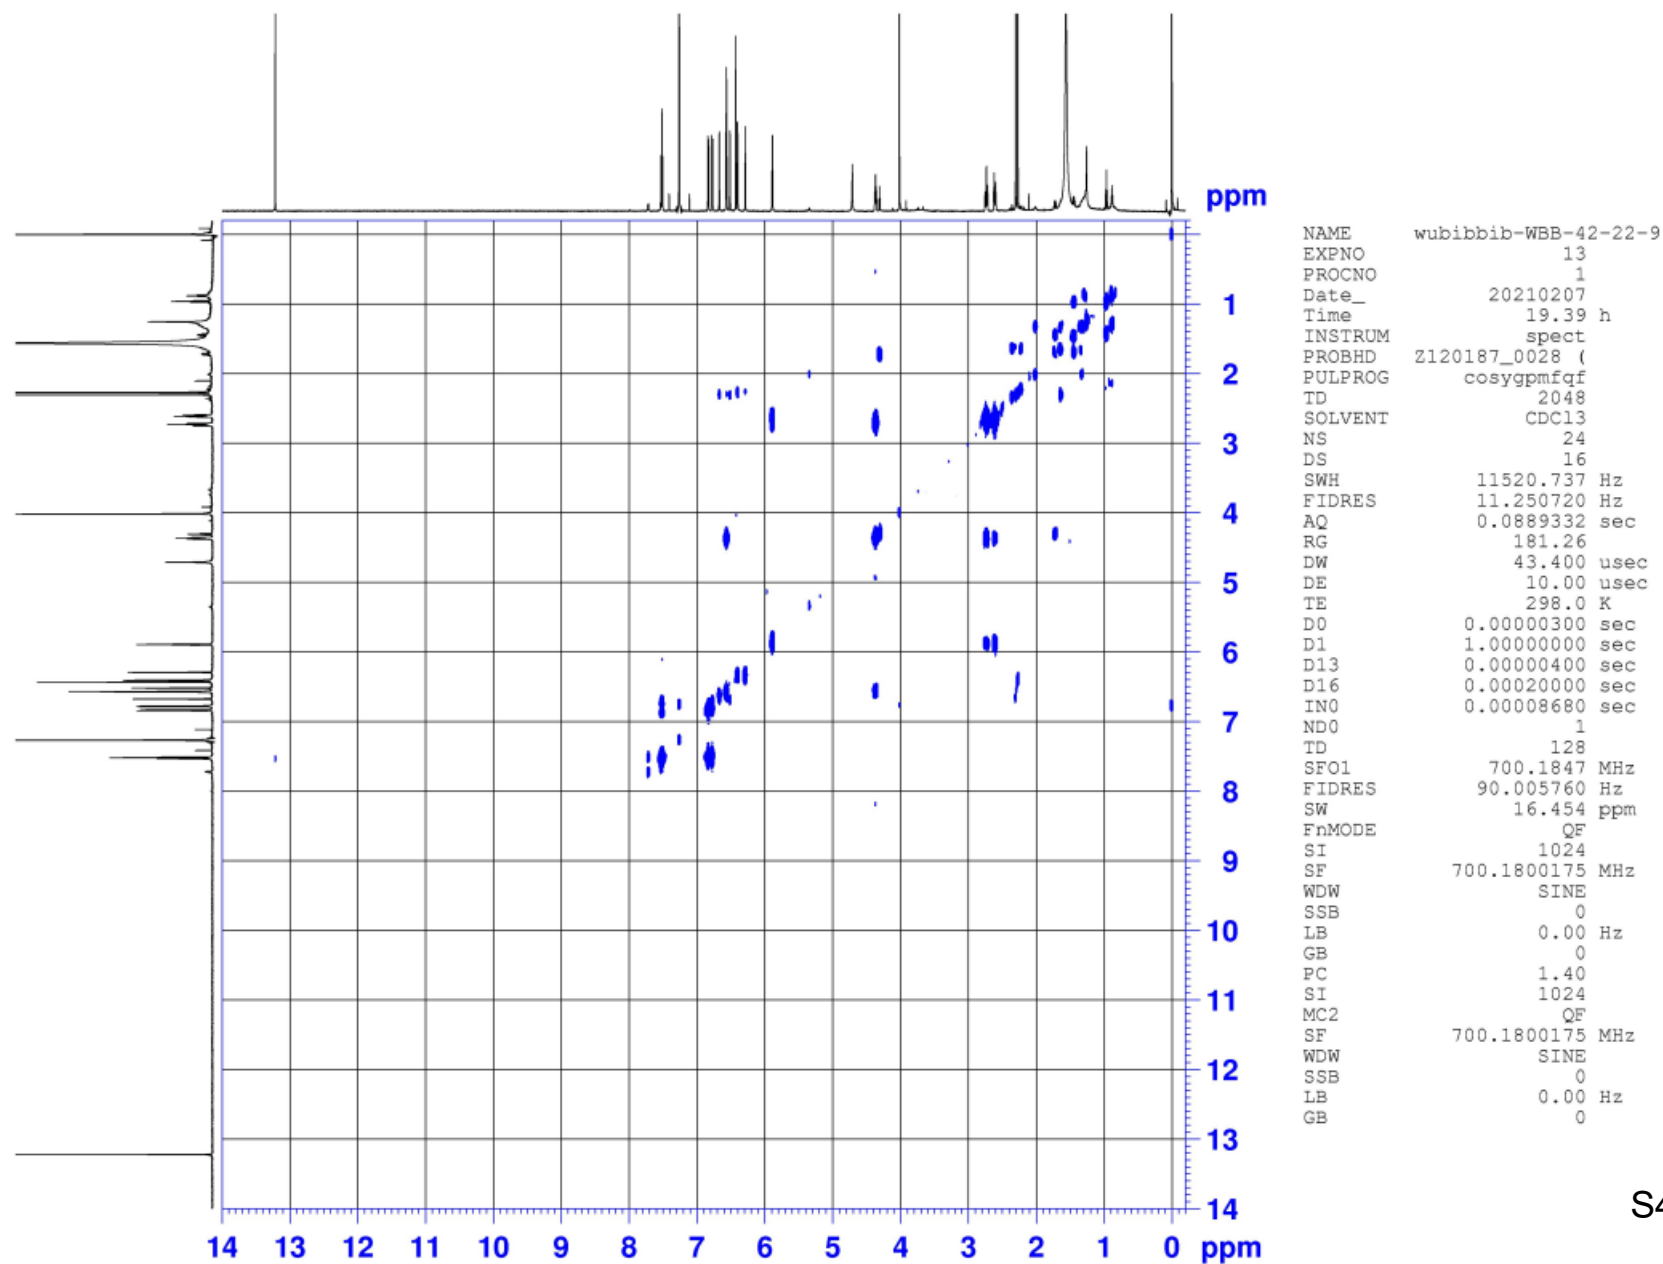

$^1\text{H}$ - $^1\text{H}$  COSY (700 MHz) spectrum of **2** in  $\text{CDCl}_3$

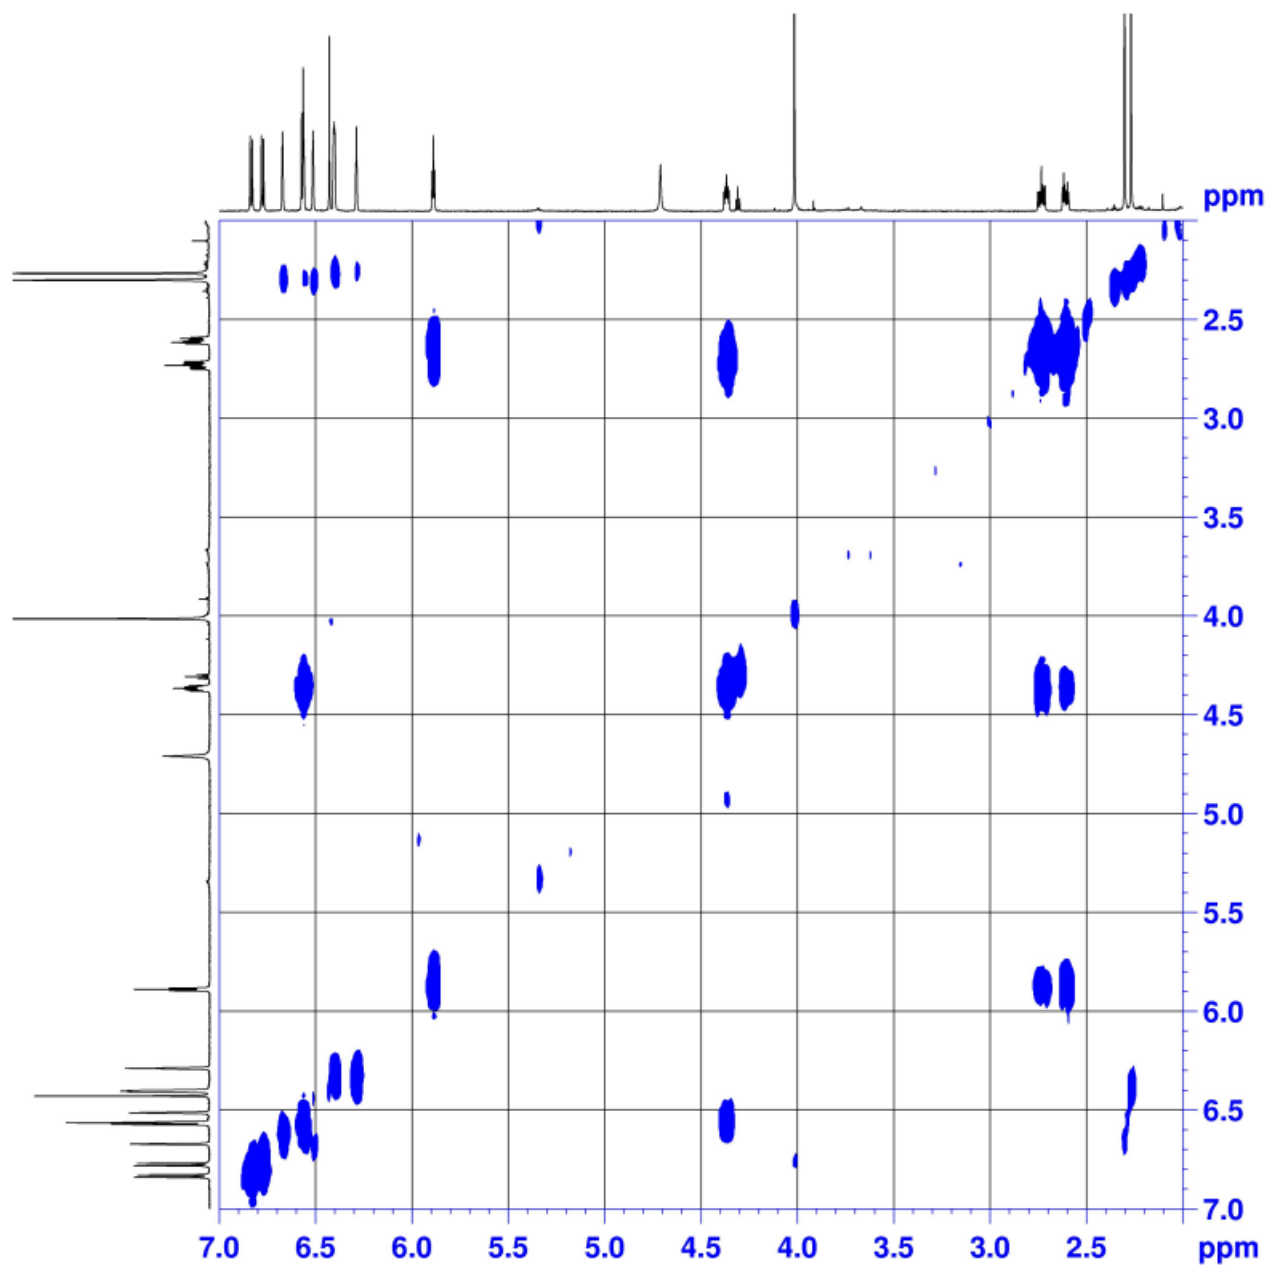

# HSQC (700 MHz) spectrum of **2** in CDCl<sub>3</sub>

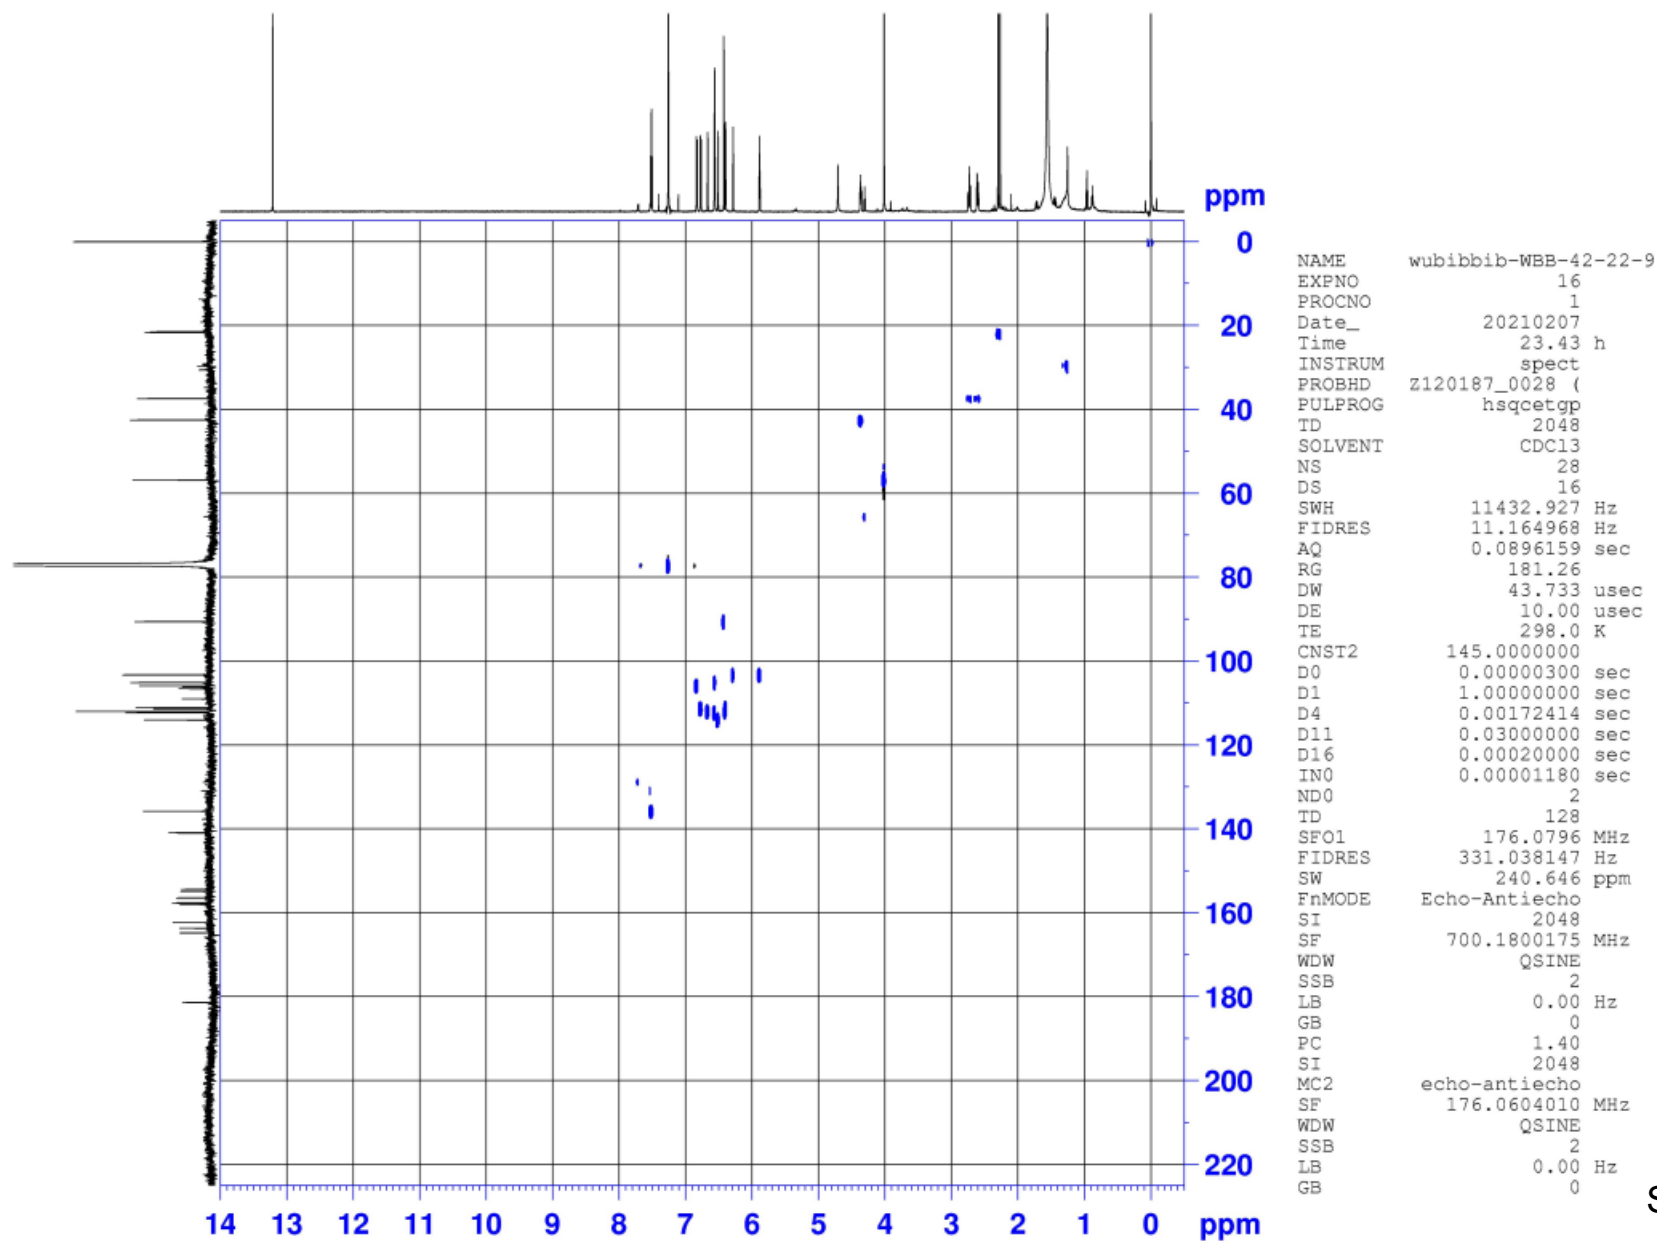

HSQC (700 MHz) spectrum of **2** in CDCl<sub>3</sub>

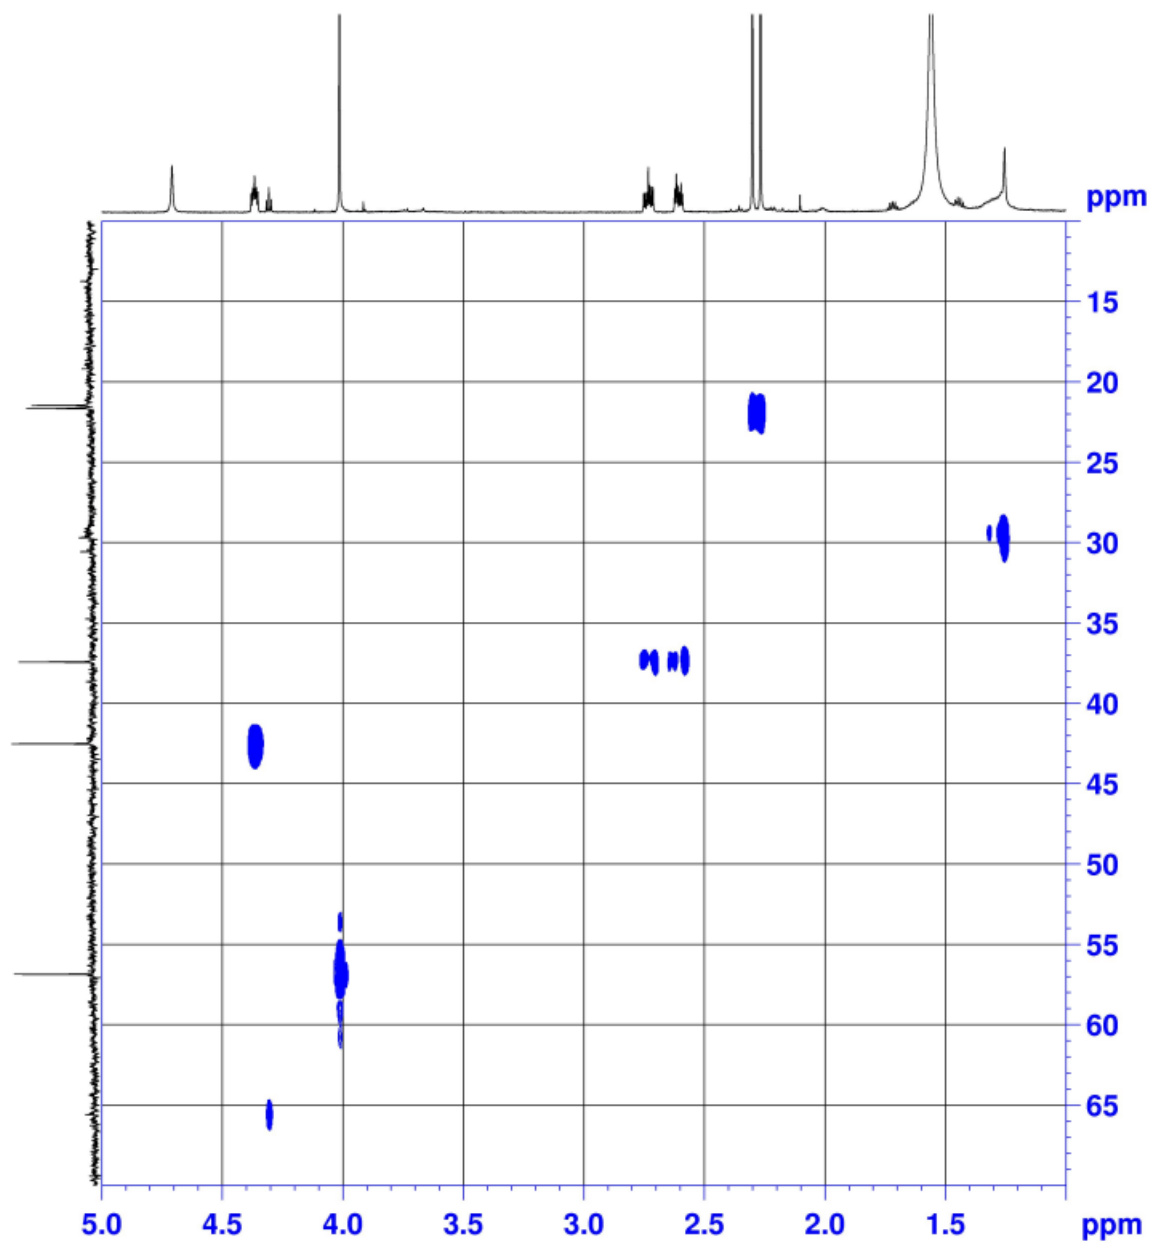

HSQC (700 MHz) spectrum of **2** in  $\text{CDCl}_3$

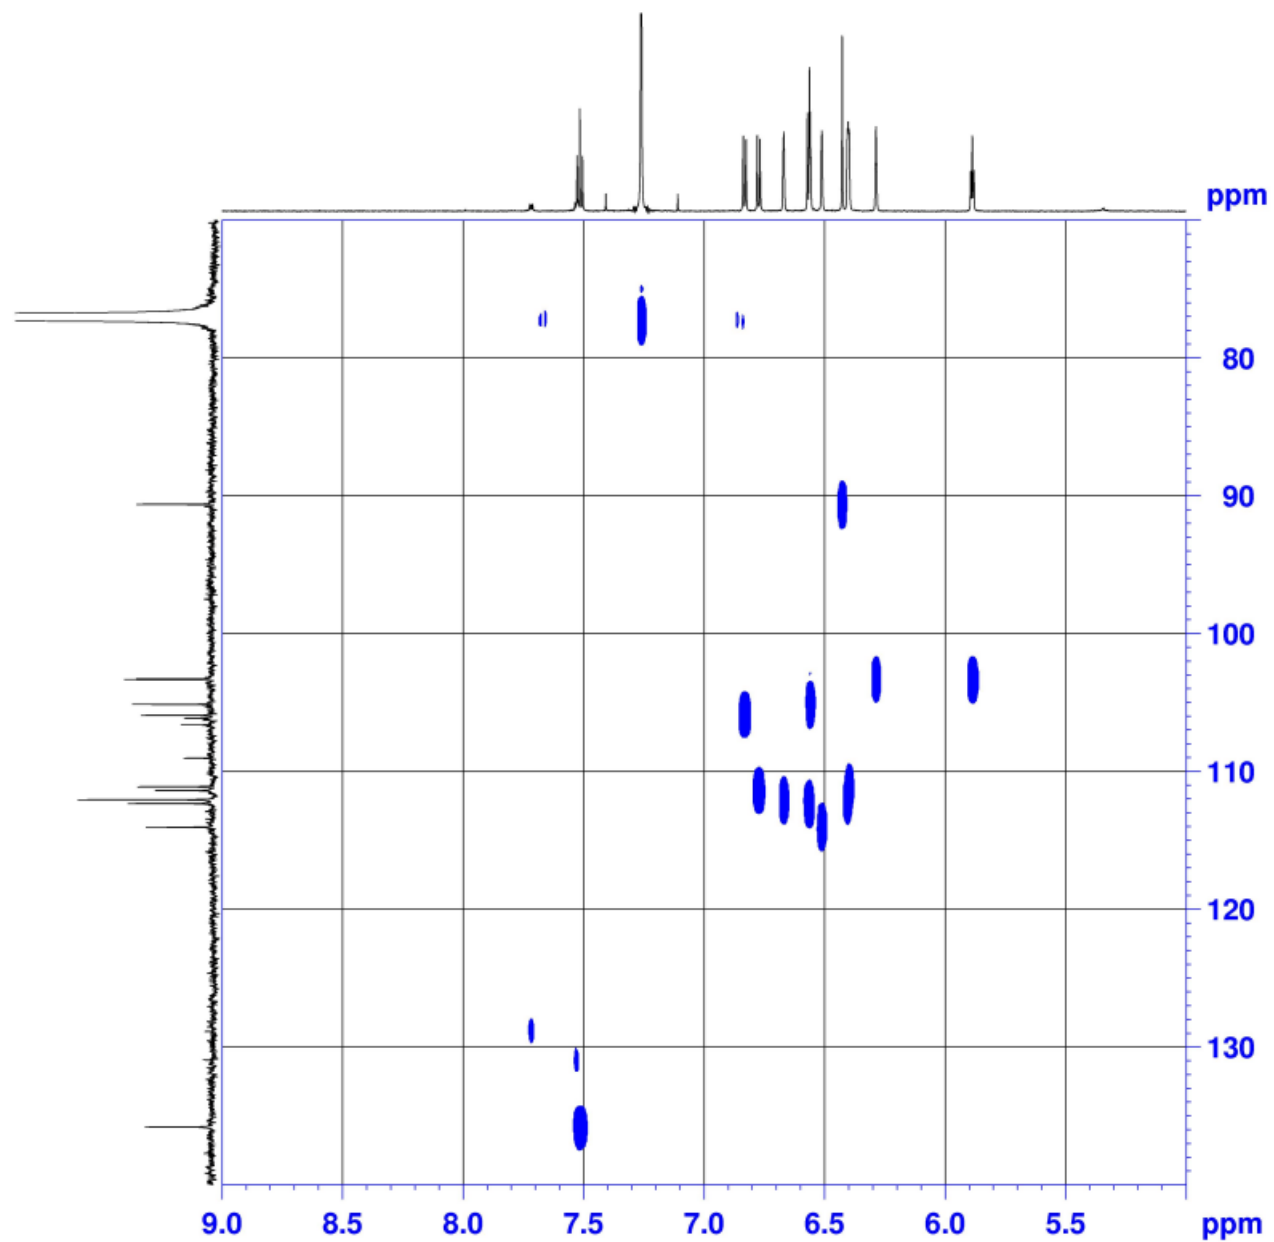

# HMBC (700 MHz) spectrum of **2** in CDCl<sub>3</sub>

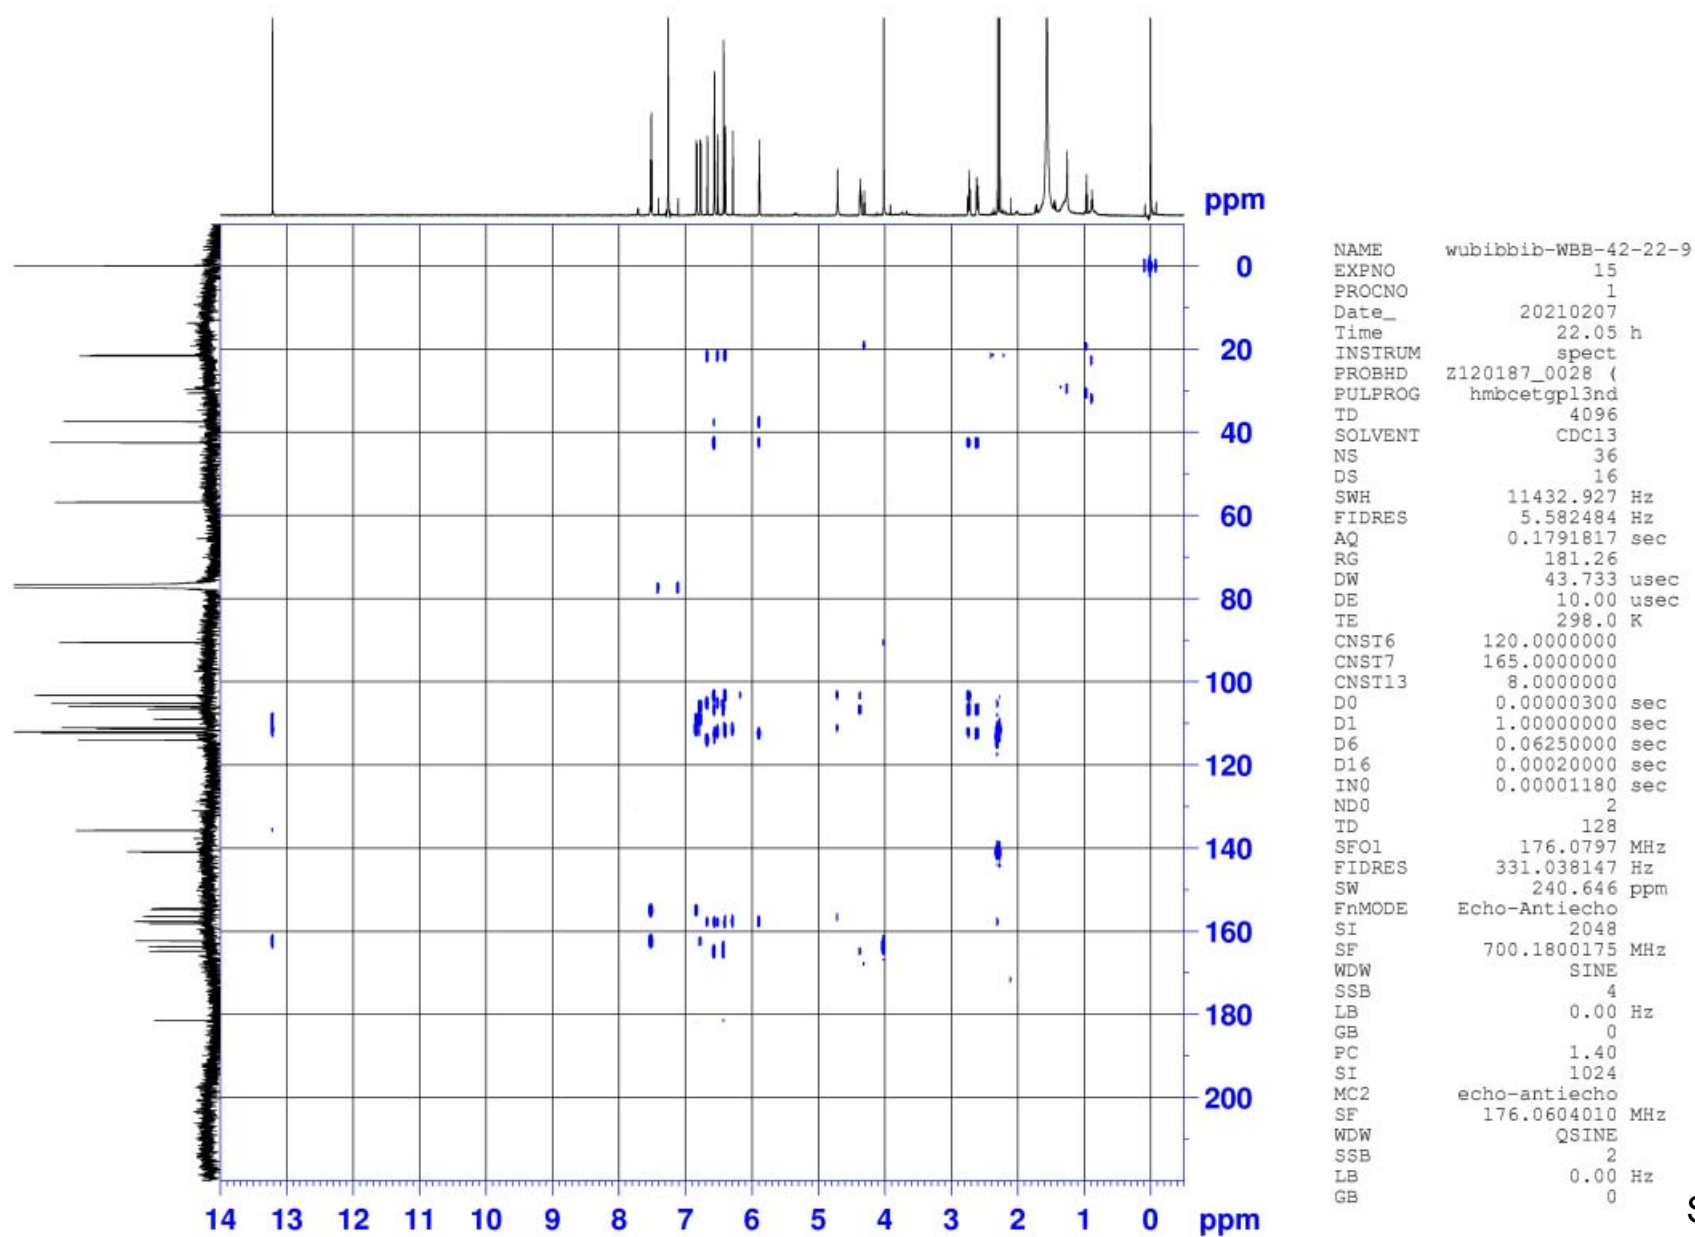



HMBC (700 MHz) spectrum of **2** in CDCl<sub>3</sub>

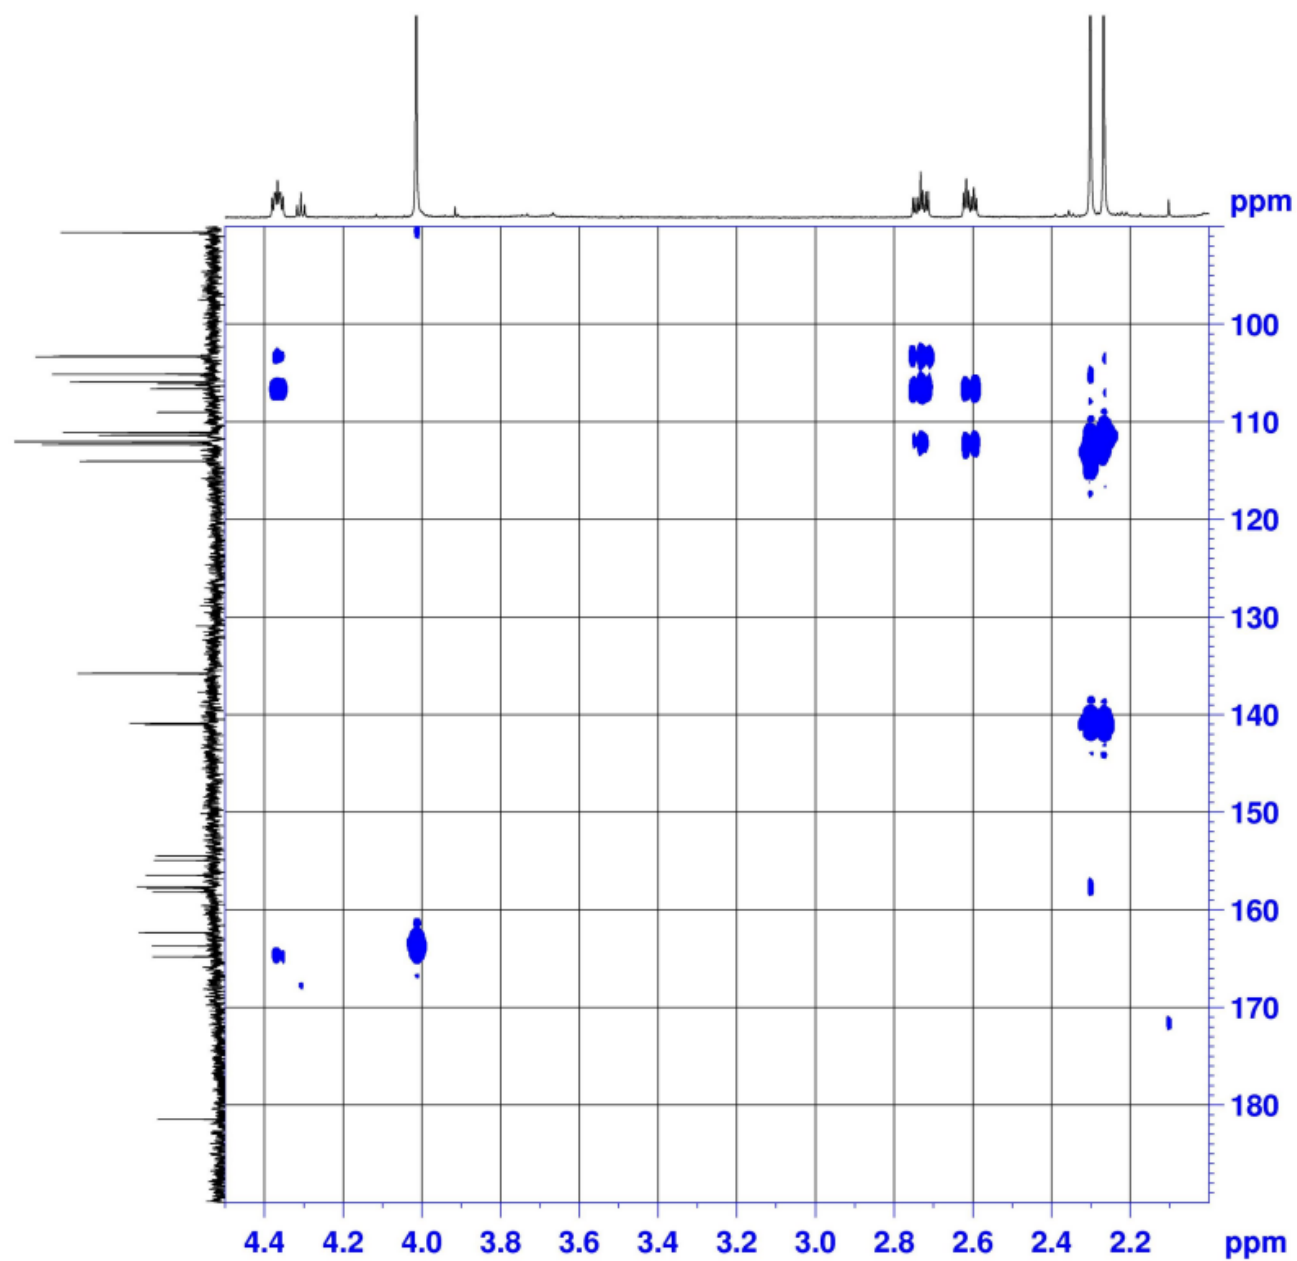

HMBC (700 MHz) spectrum of **2** in CDCl<sub>3</sub>

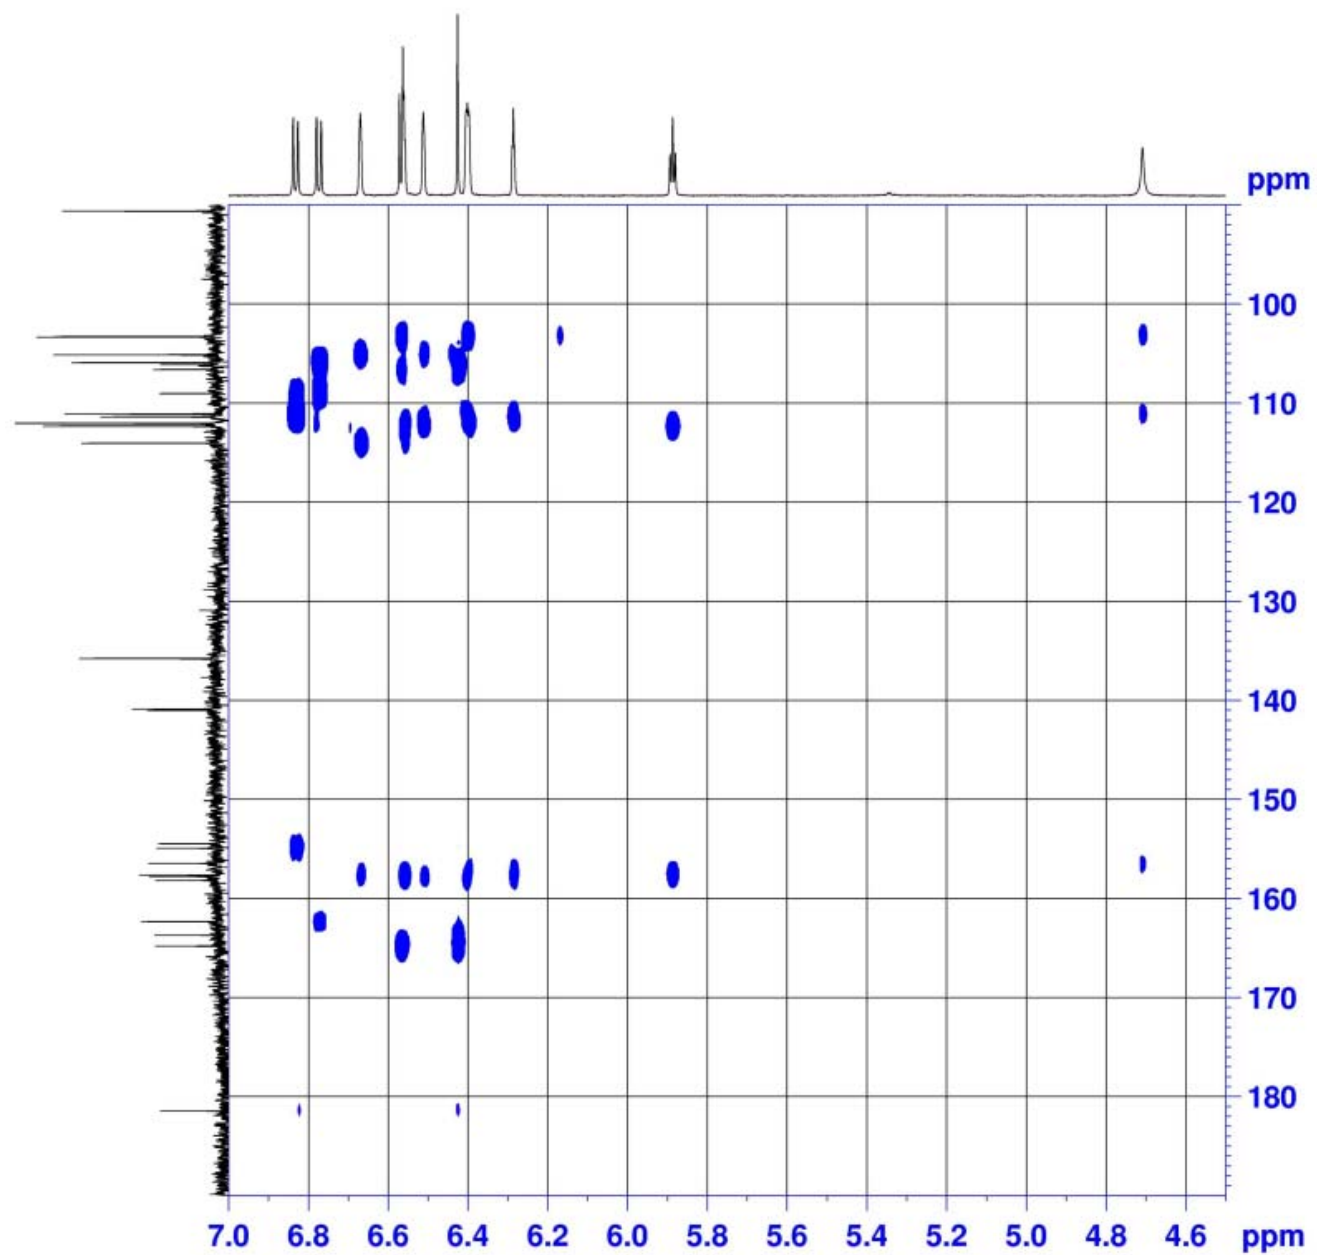

# NOESY (700 MHz) spectrum of **2** in CDCl<sub>3</sub>

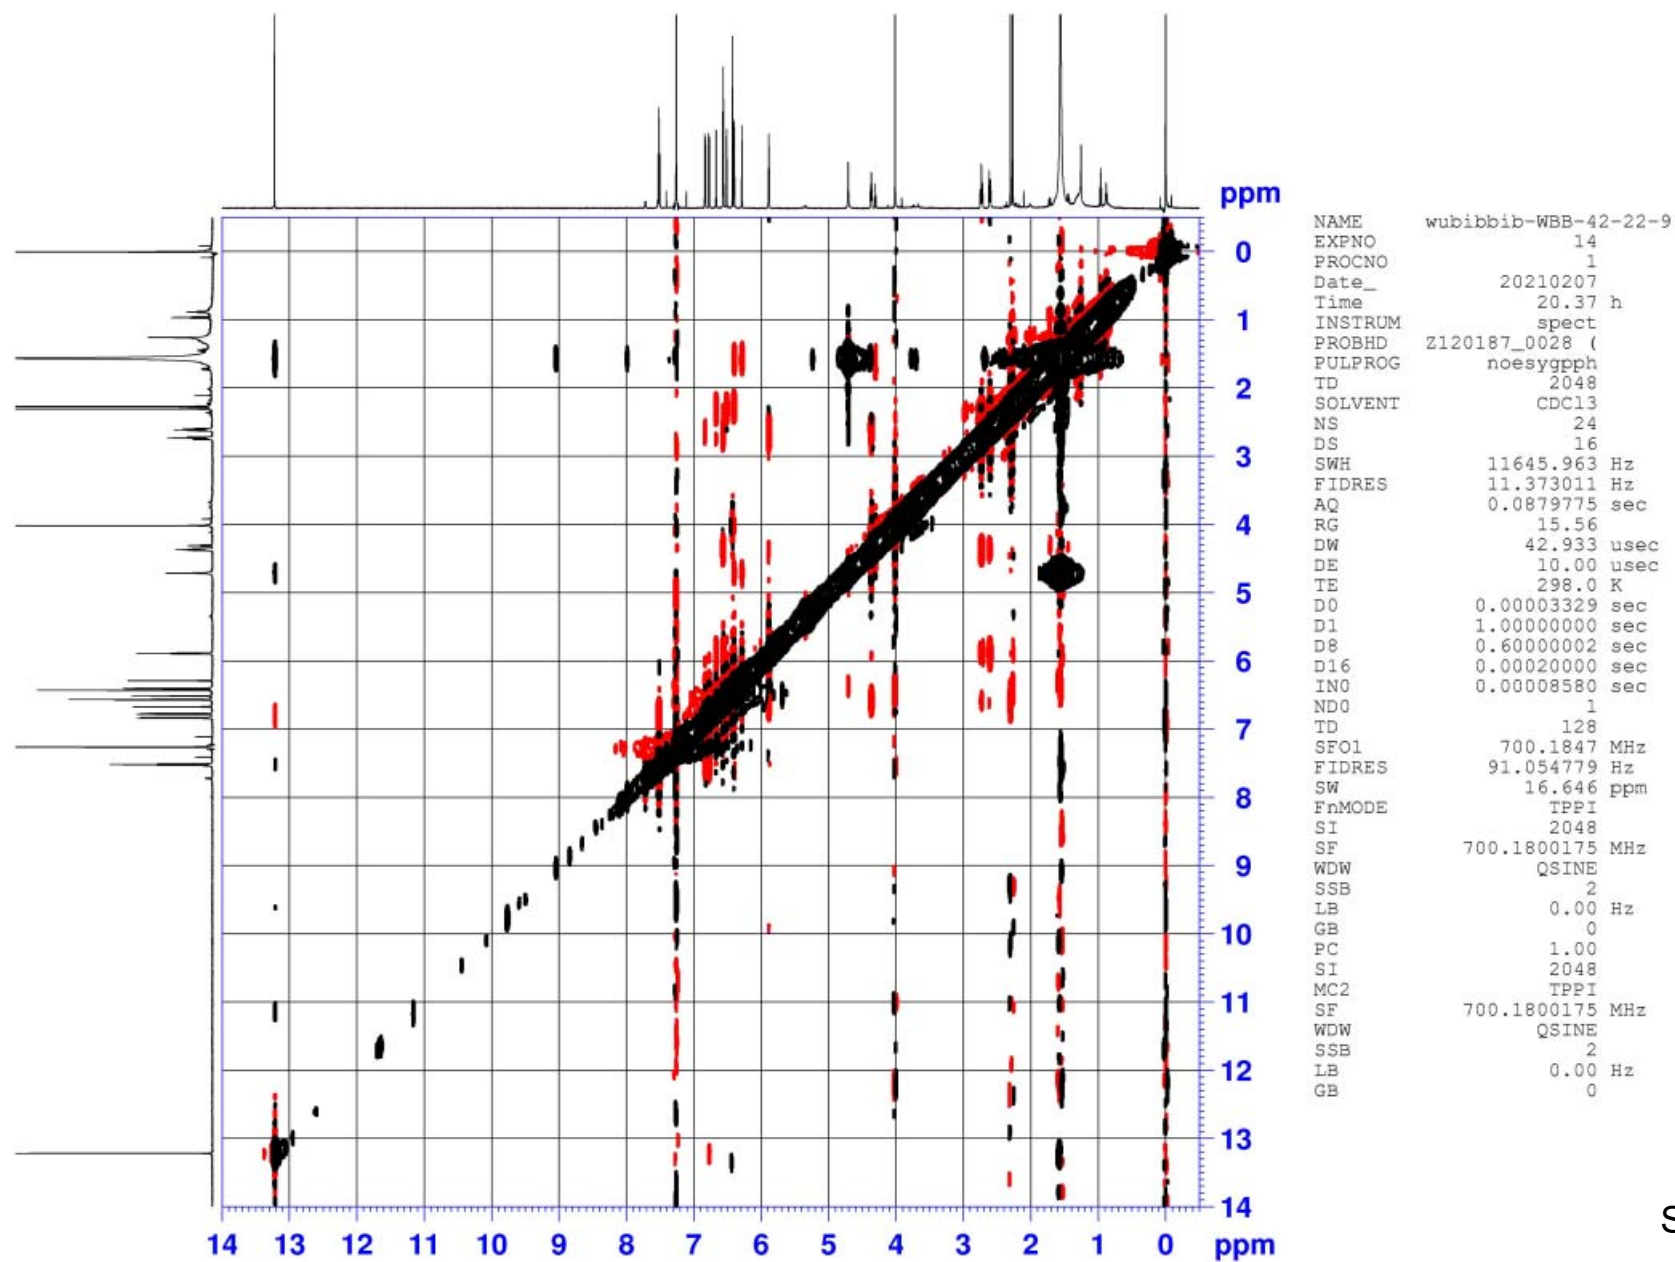

NOESY (700 MHz) spectrum of **2** in CDCl<sub>3</sub>

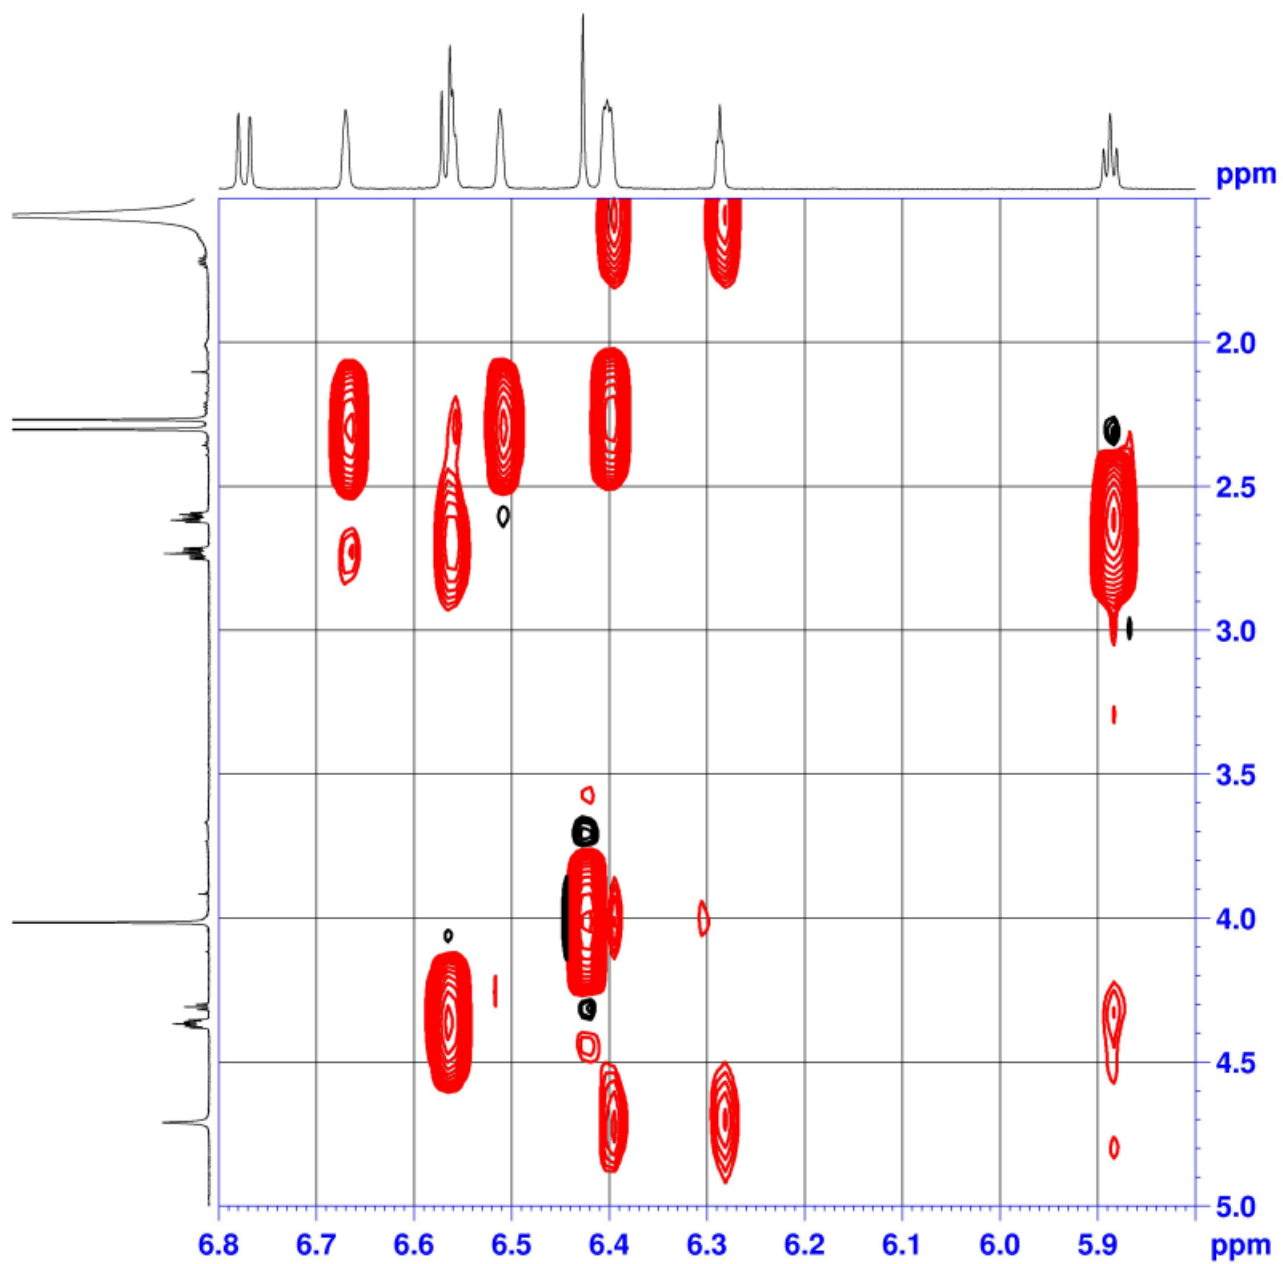

## HR-ESIMS for **3**

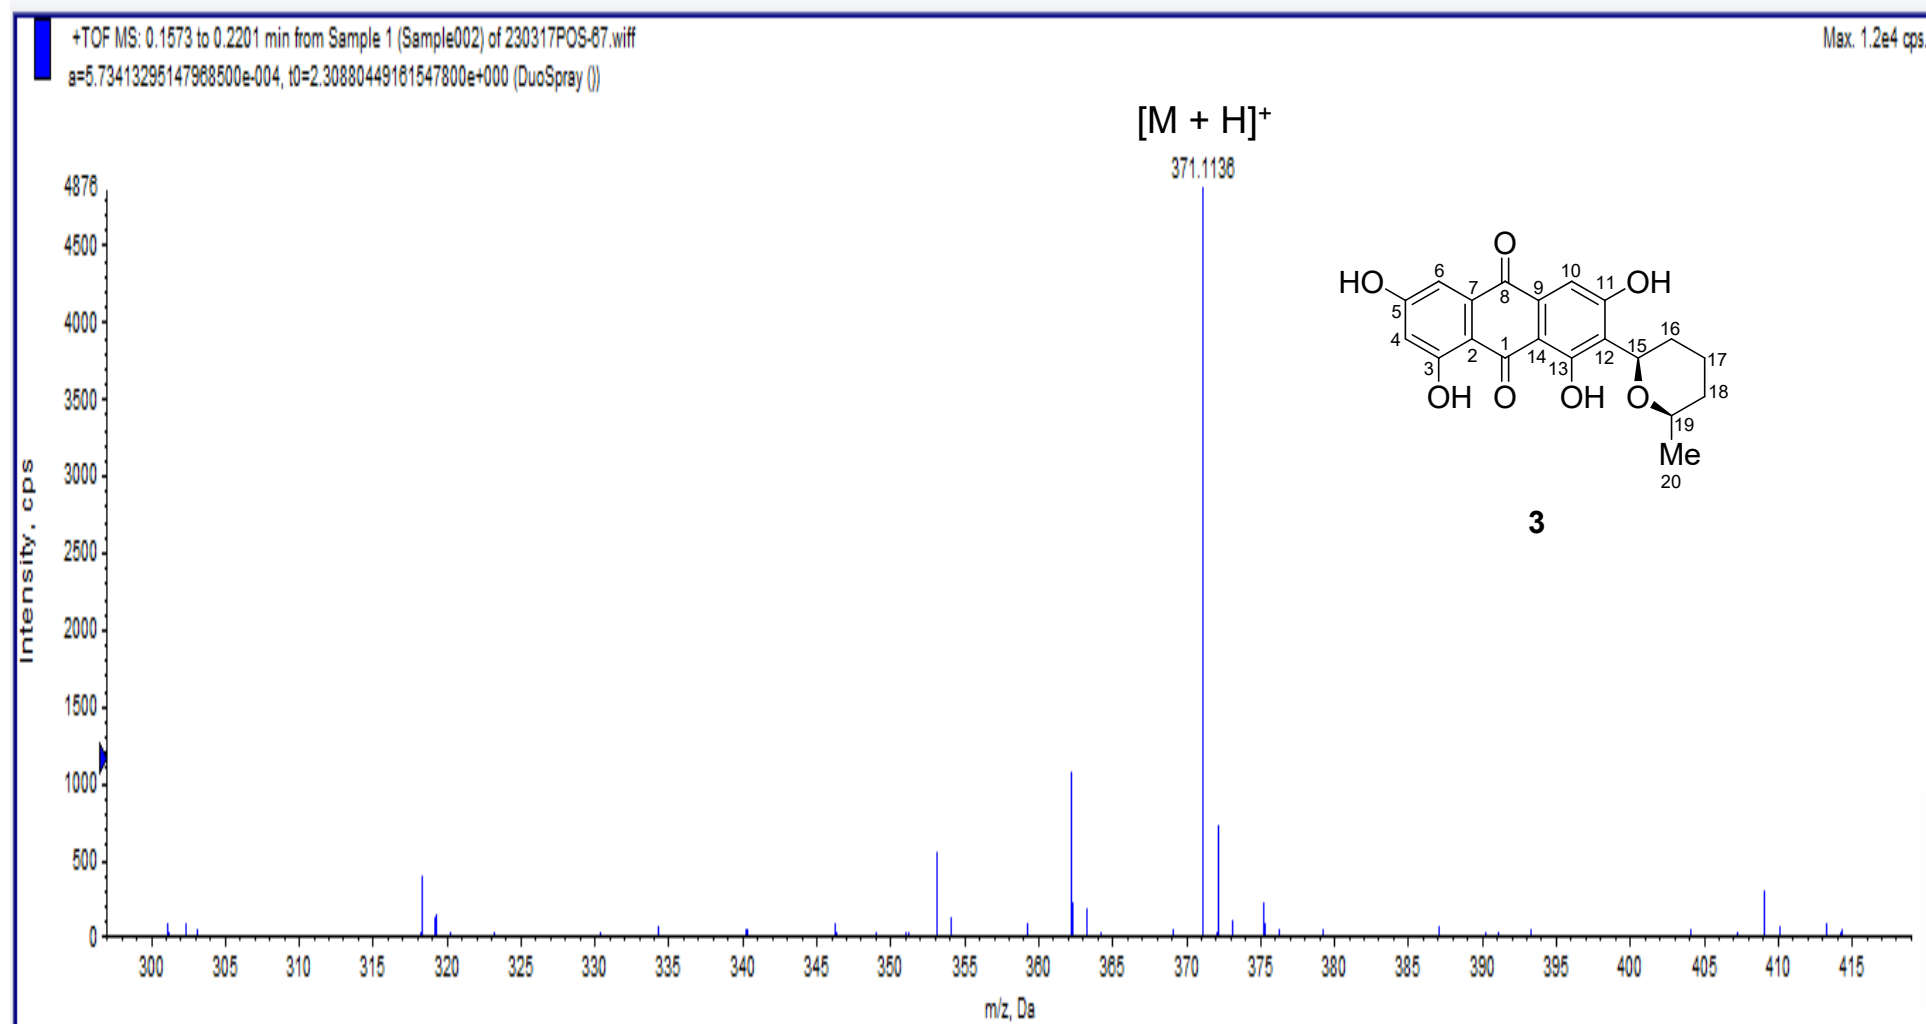

$^1\text{H}$  (400 MHz) NMR spectrum of **3** in  $\text{DMSO-}d_6$

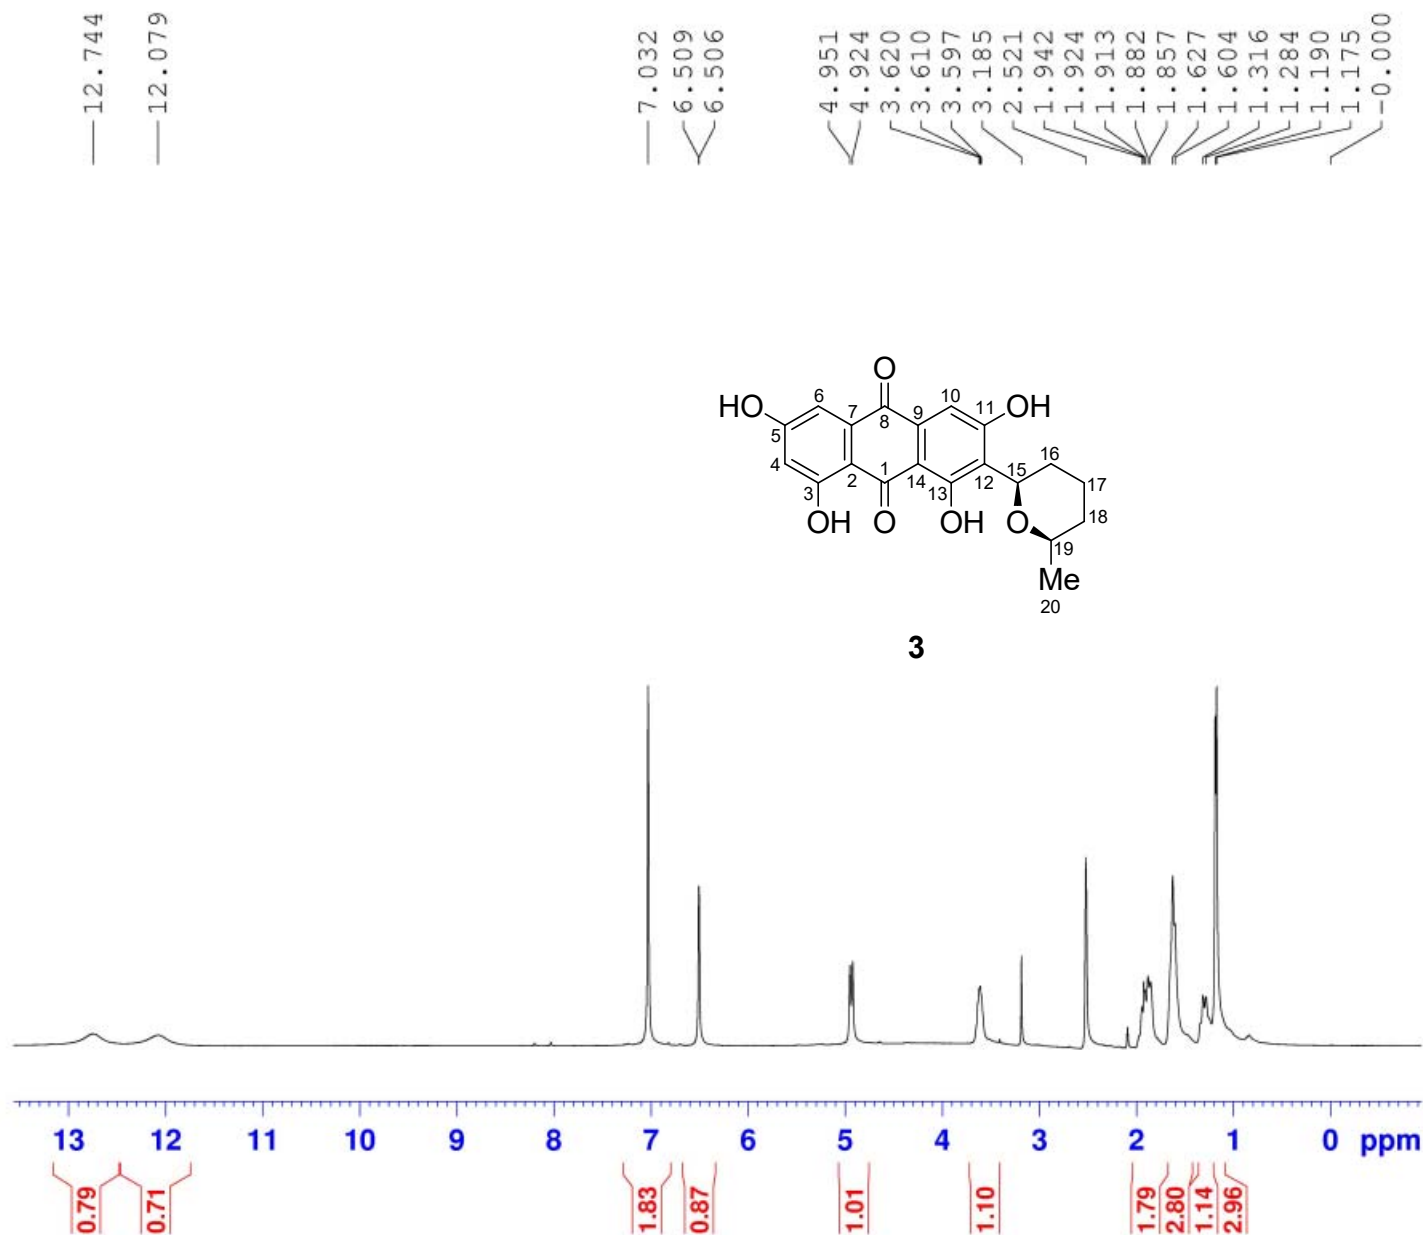

```

NAME      wbb-44-46-3-1
EXPNO     1
PROCNO    1
Date_     20230303
Time      8.23
INSTRUM   spect
PROBHD    5 mm PABBO BB/
PULPROG   zg30
TD        65536
SOLVENT   DMSO
NS        16
DS        2
SWH       8012.820 Hz
FIDRES    0.122266 Hz
AQ        4.0894966 sec
RG        54.9
DW        62.400 usec
DE        6.50 usec
TE        0.0 K
D1        1.00000000 sec
TD0       1
    
```

```

===== CHANNEL f1 =====
SFO1      400.1324710 MHz
NUC1      1H
P1        10.00 usec
SI        65536
SF        400.1299945 MHz
WDW       EM
SSB       0
LB        0.30 Hz
GB        0
PC        1.00
    
```

$^1\text{H}$  (400 MHz) NMR spectrum of **3** in  $\text{DMSO-}d_6$

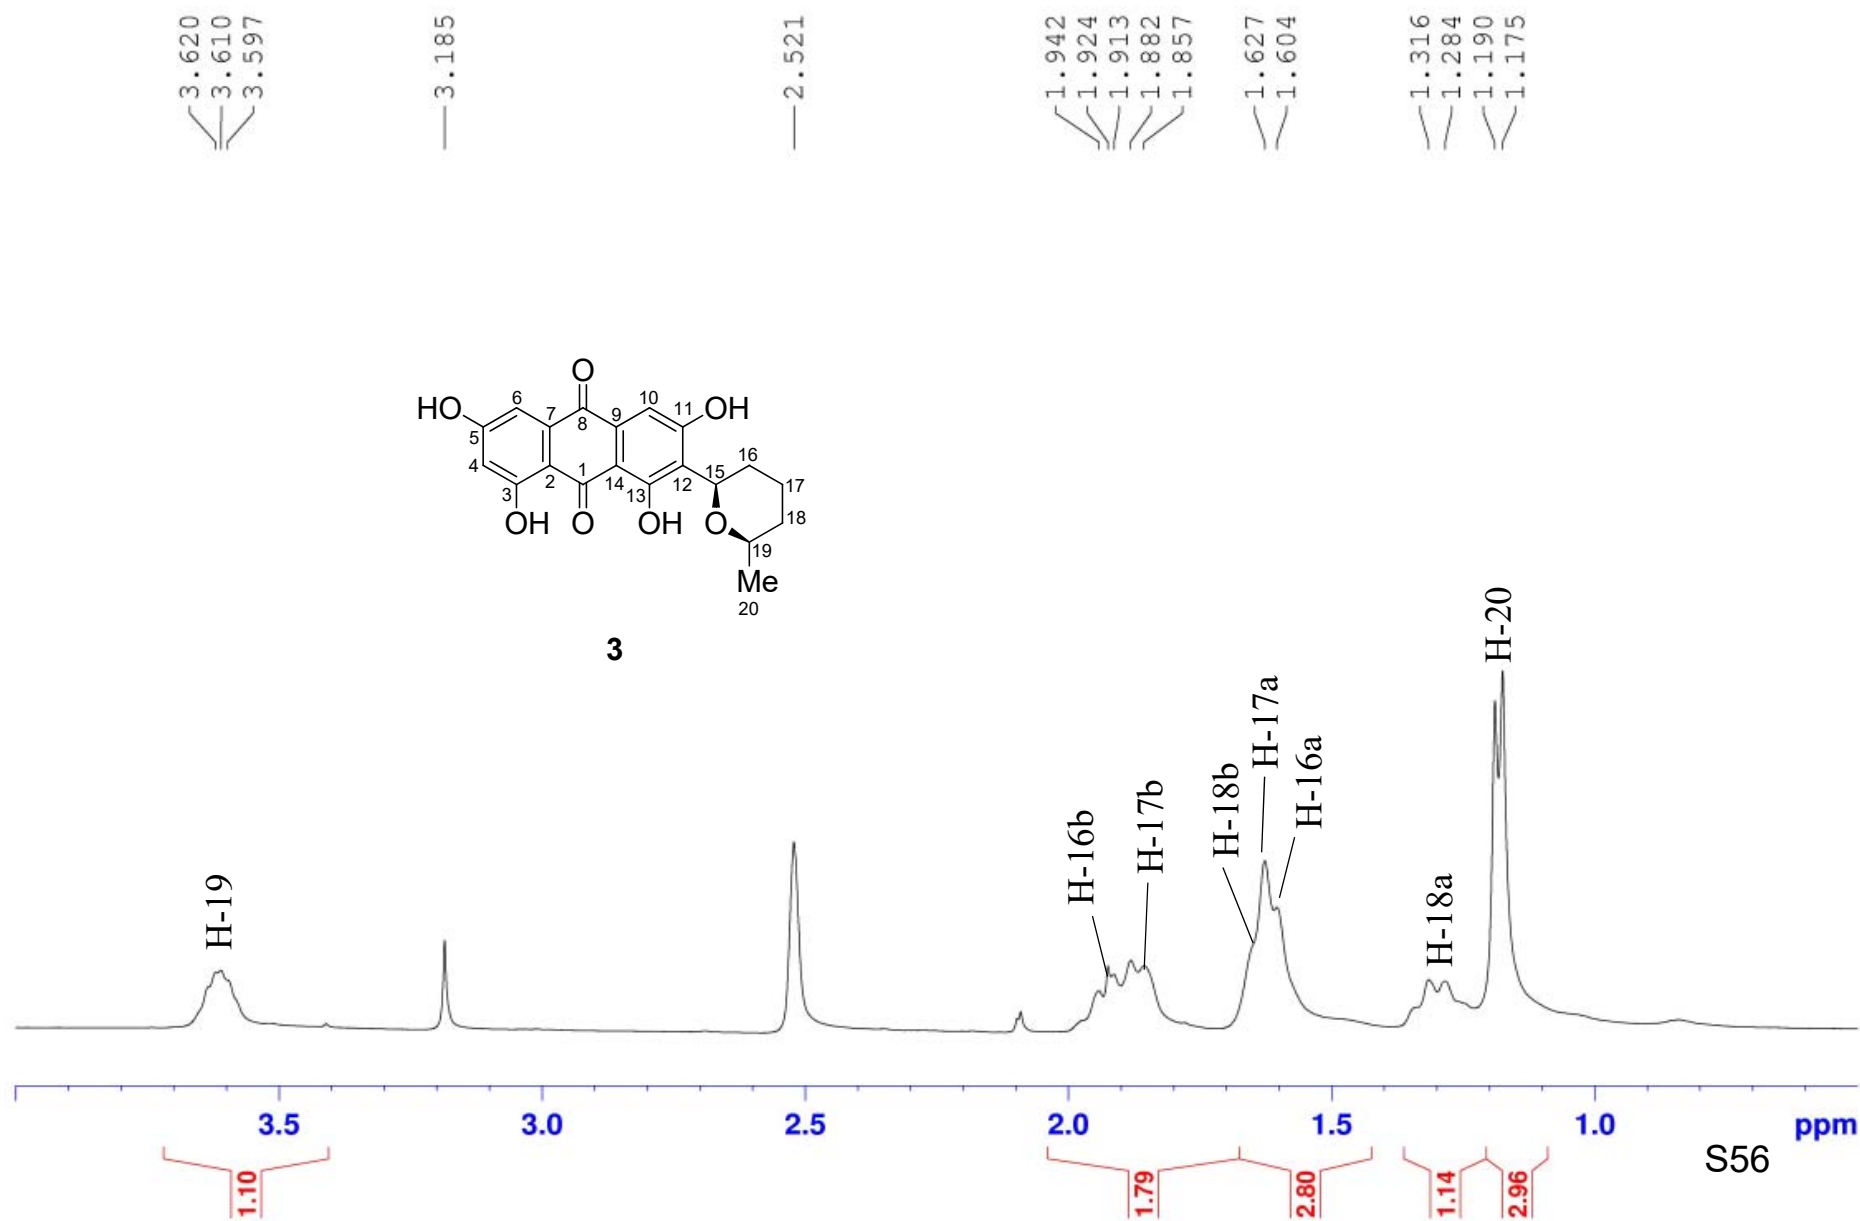

$^1\text{H}$  (400 MHz) NMR spectrum of **3** in  $\text{DMSO-}d_6$

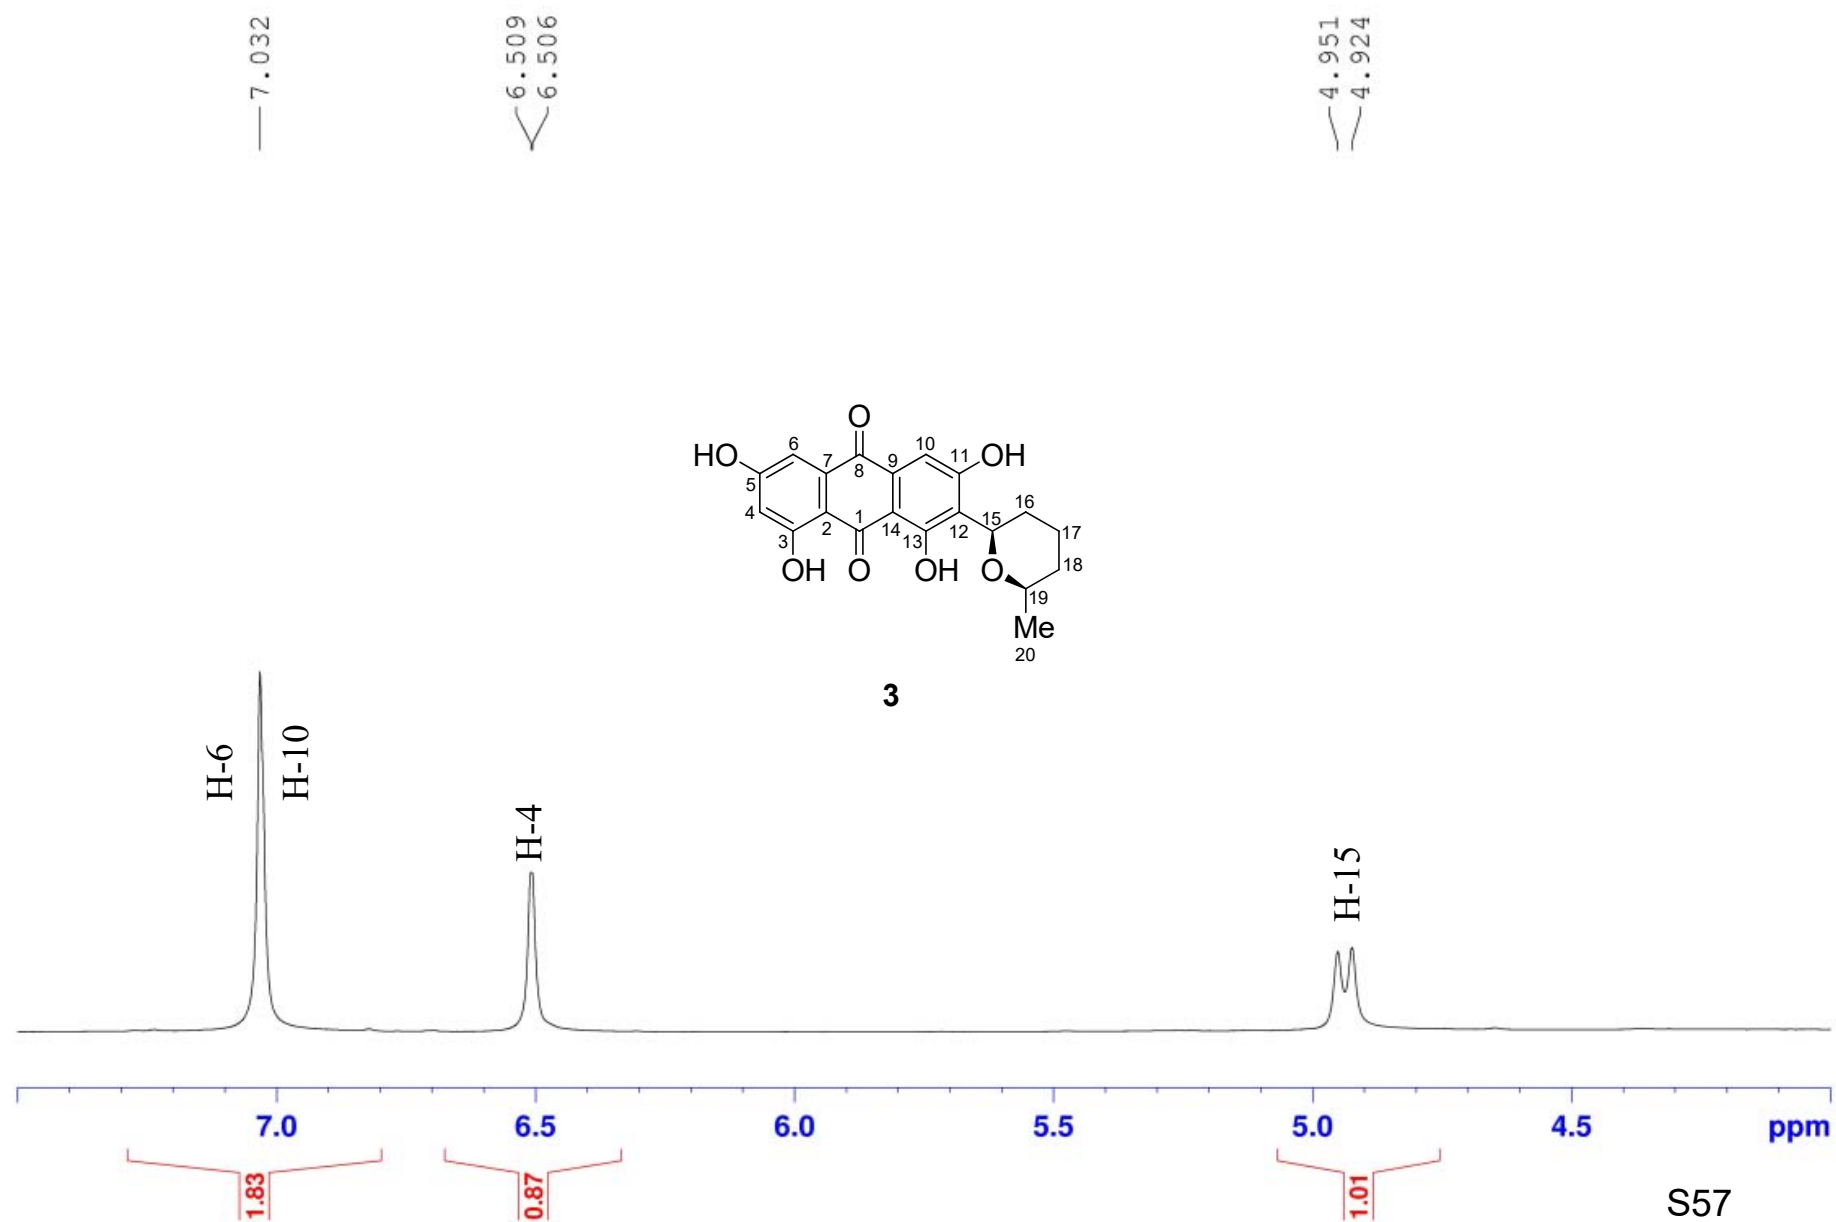



$^{13}\text{C}$  (100 MHz) NMR spectrum of **3** in  $\text{DMSO-}d_6$

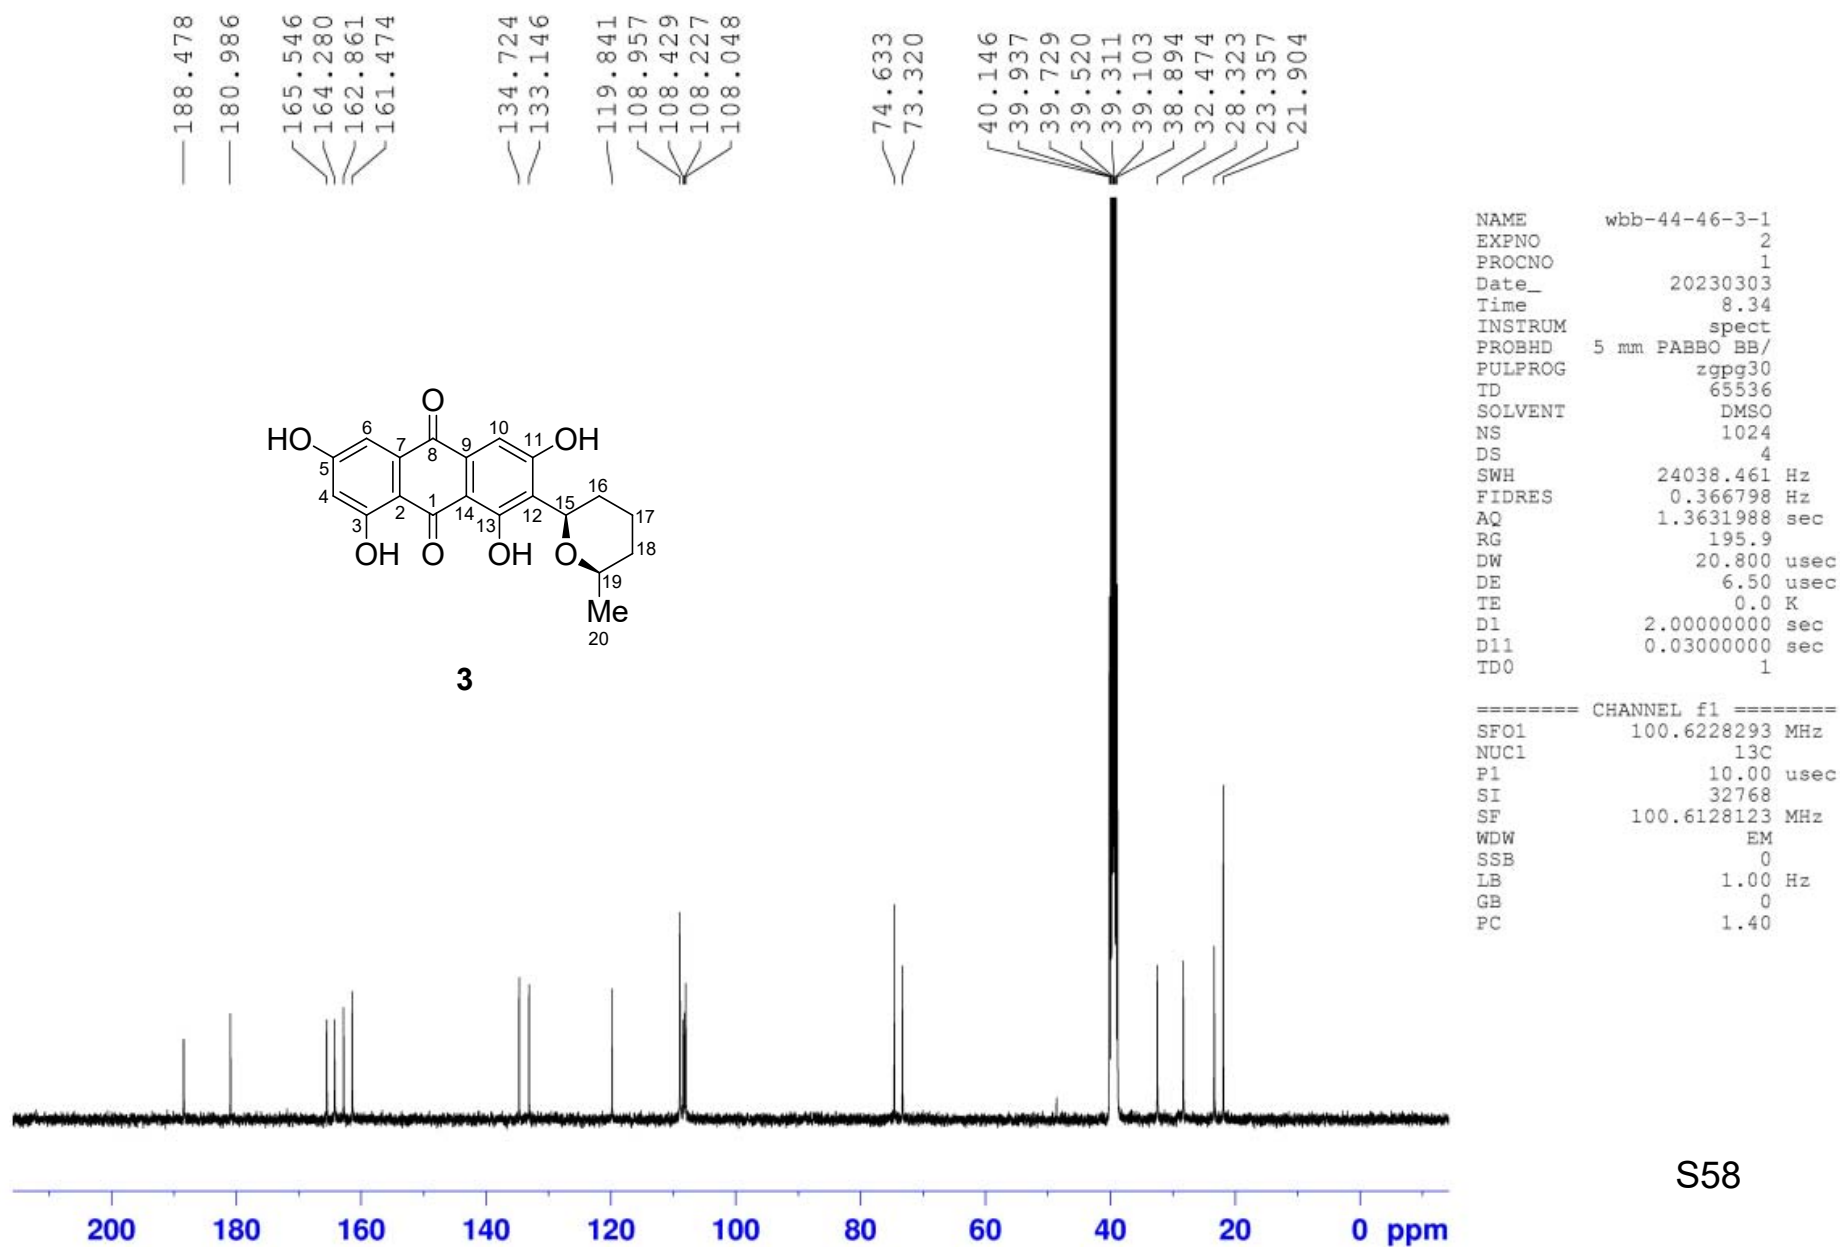

$^{13}\text{C}$  (100 MHz) NMR spectrum of **3** in  $\text{DMSO-}d_6$

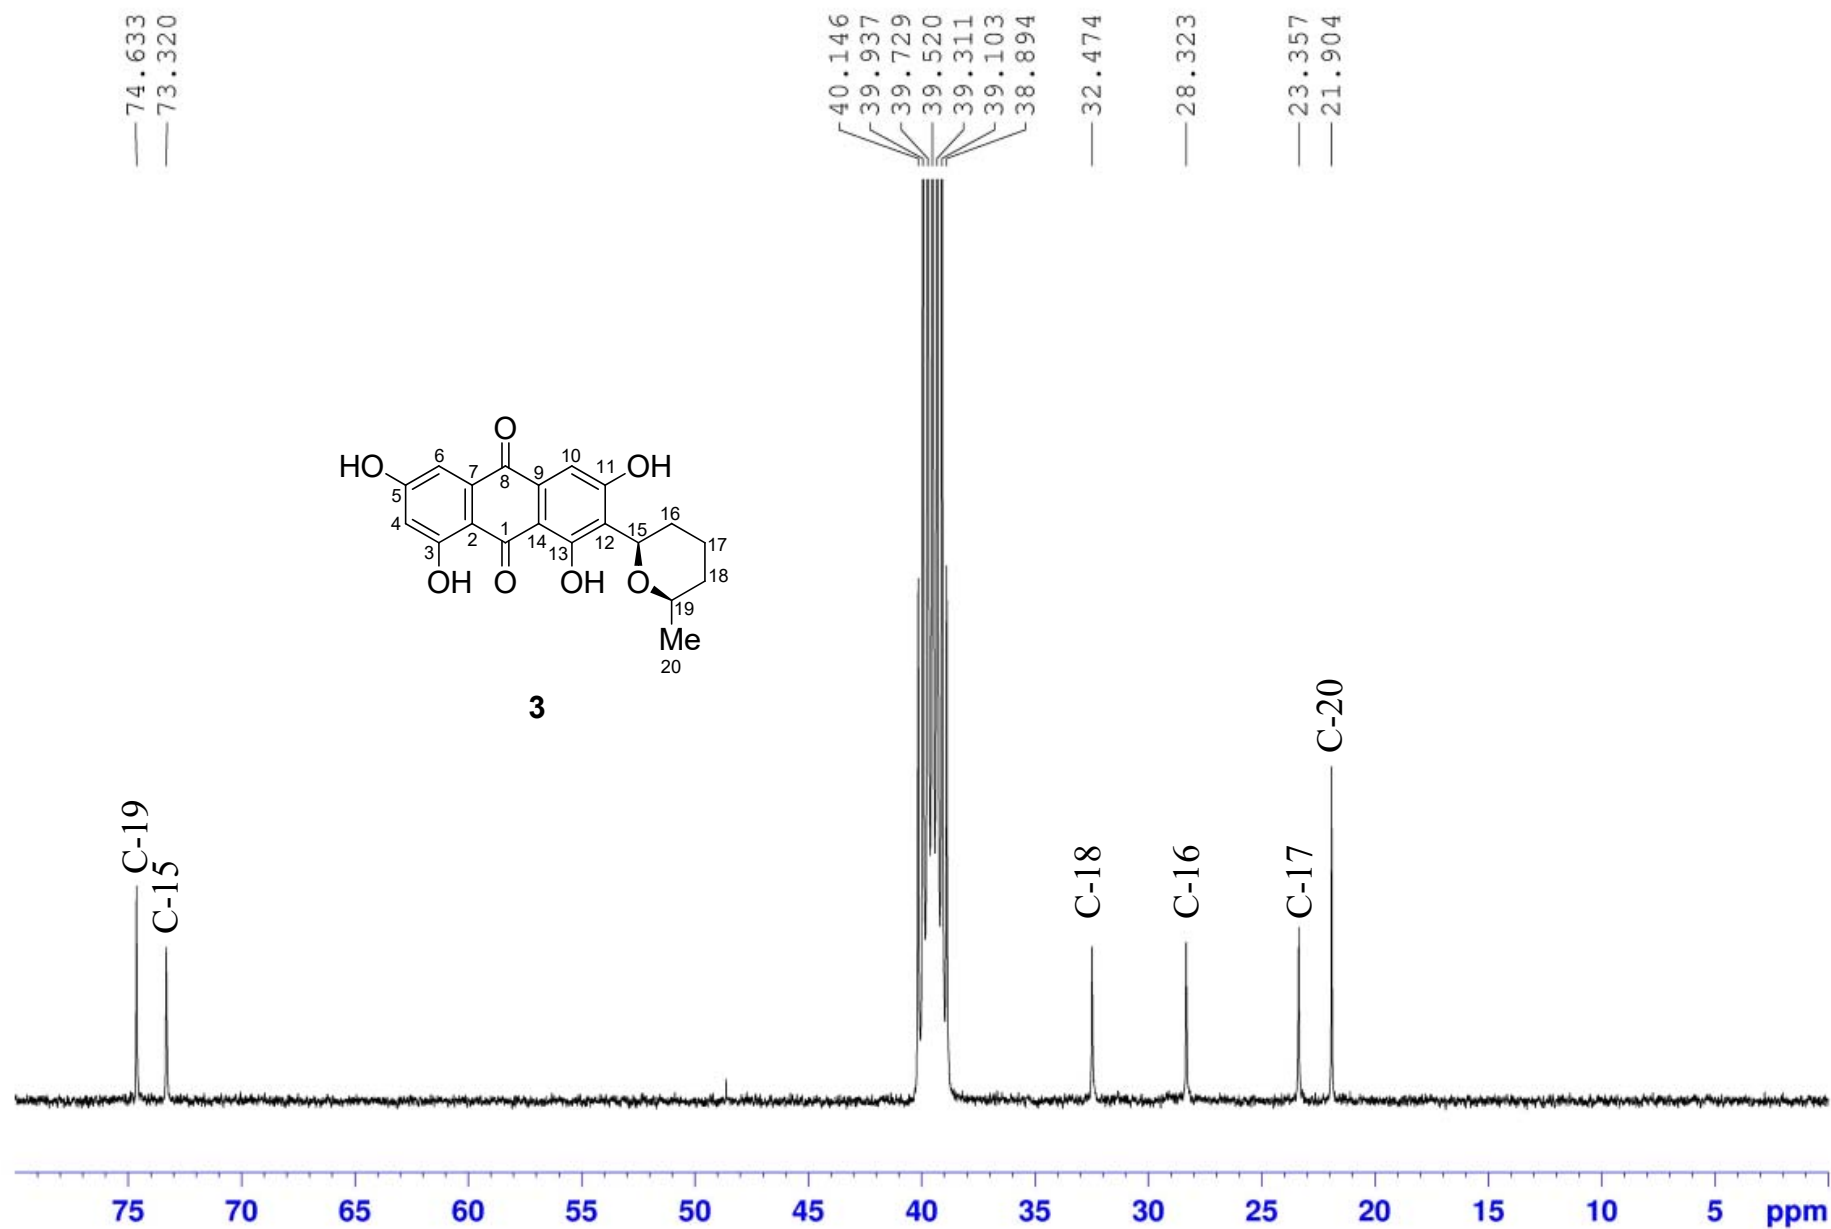

$^{13}\text{C}$  (100 MHz) NMR spectrum of **3** in  $\text{DMSO-}d_6$

— 134.724  
— 133.146

— 119.841

108.957  
108.429  
108.227  
108.048

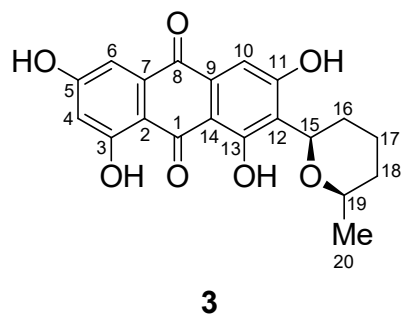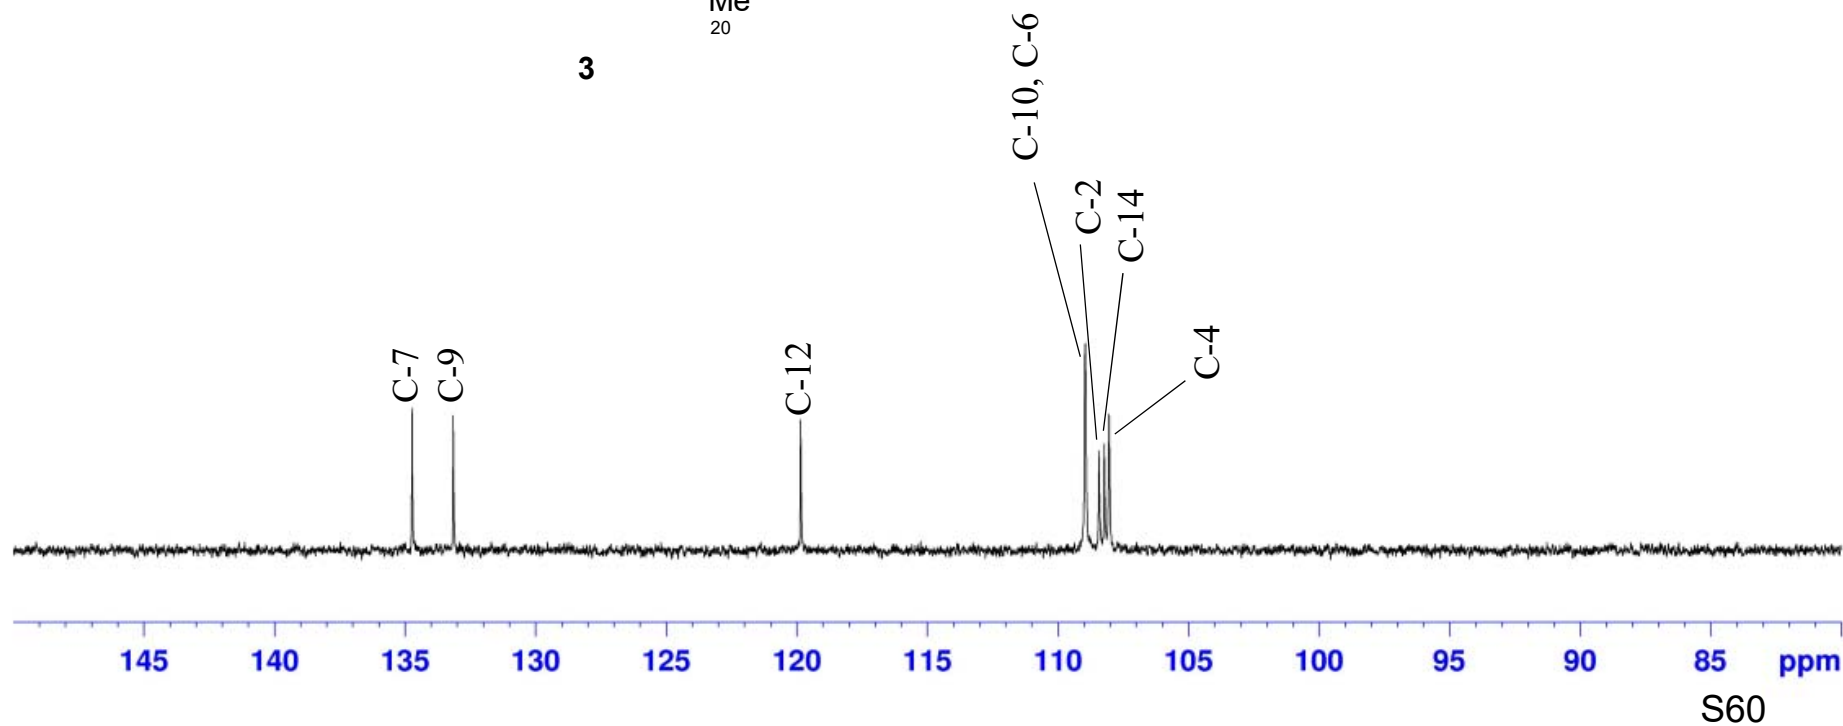

$^{13}\text{C}$  (100 MHz) NMR spectrum of **3** in  $\text{DMSO-}d_6$

—188.478

—180.986

—165.546

—164.280

—162.861

—161.474

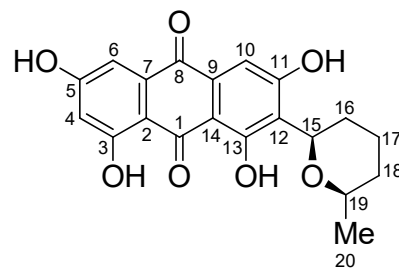

**3**

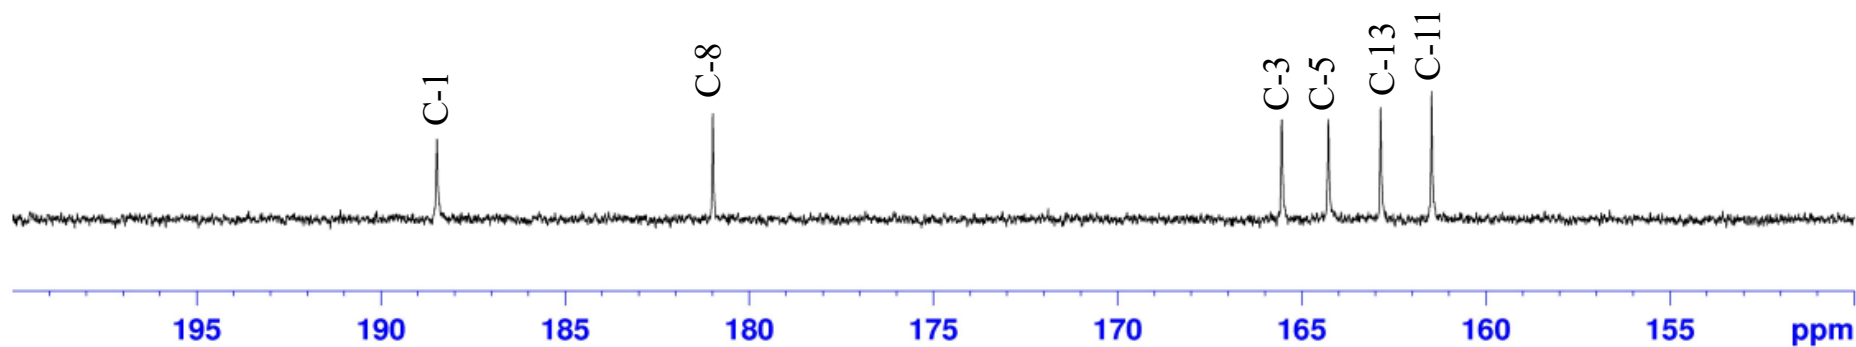

DEPT135 (100 MHz) spectrum of **3** in DMSO- $d_6$

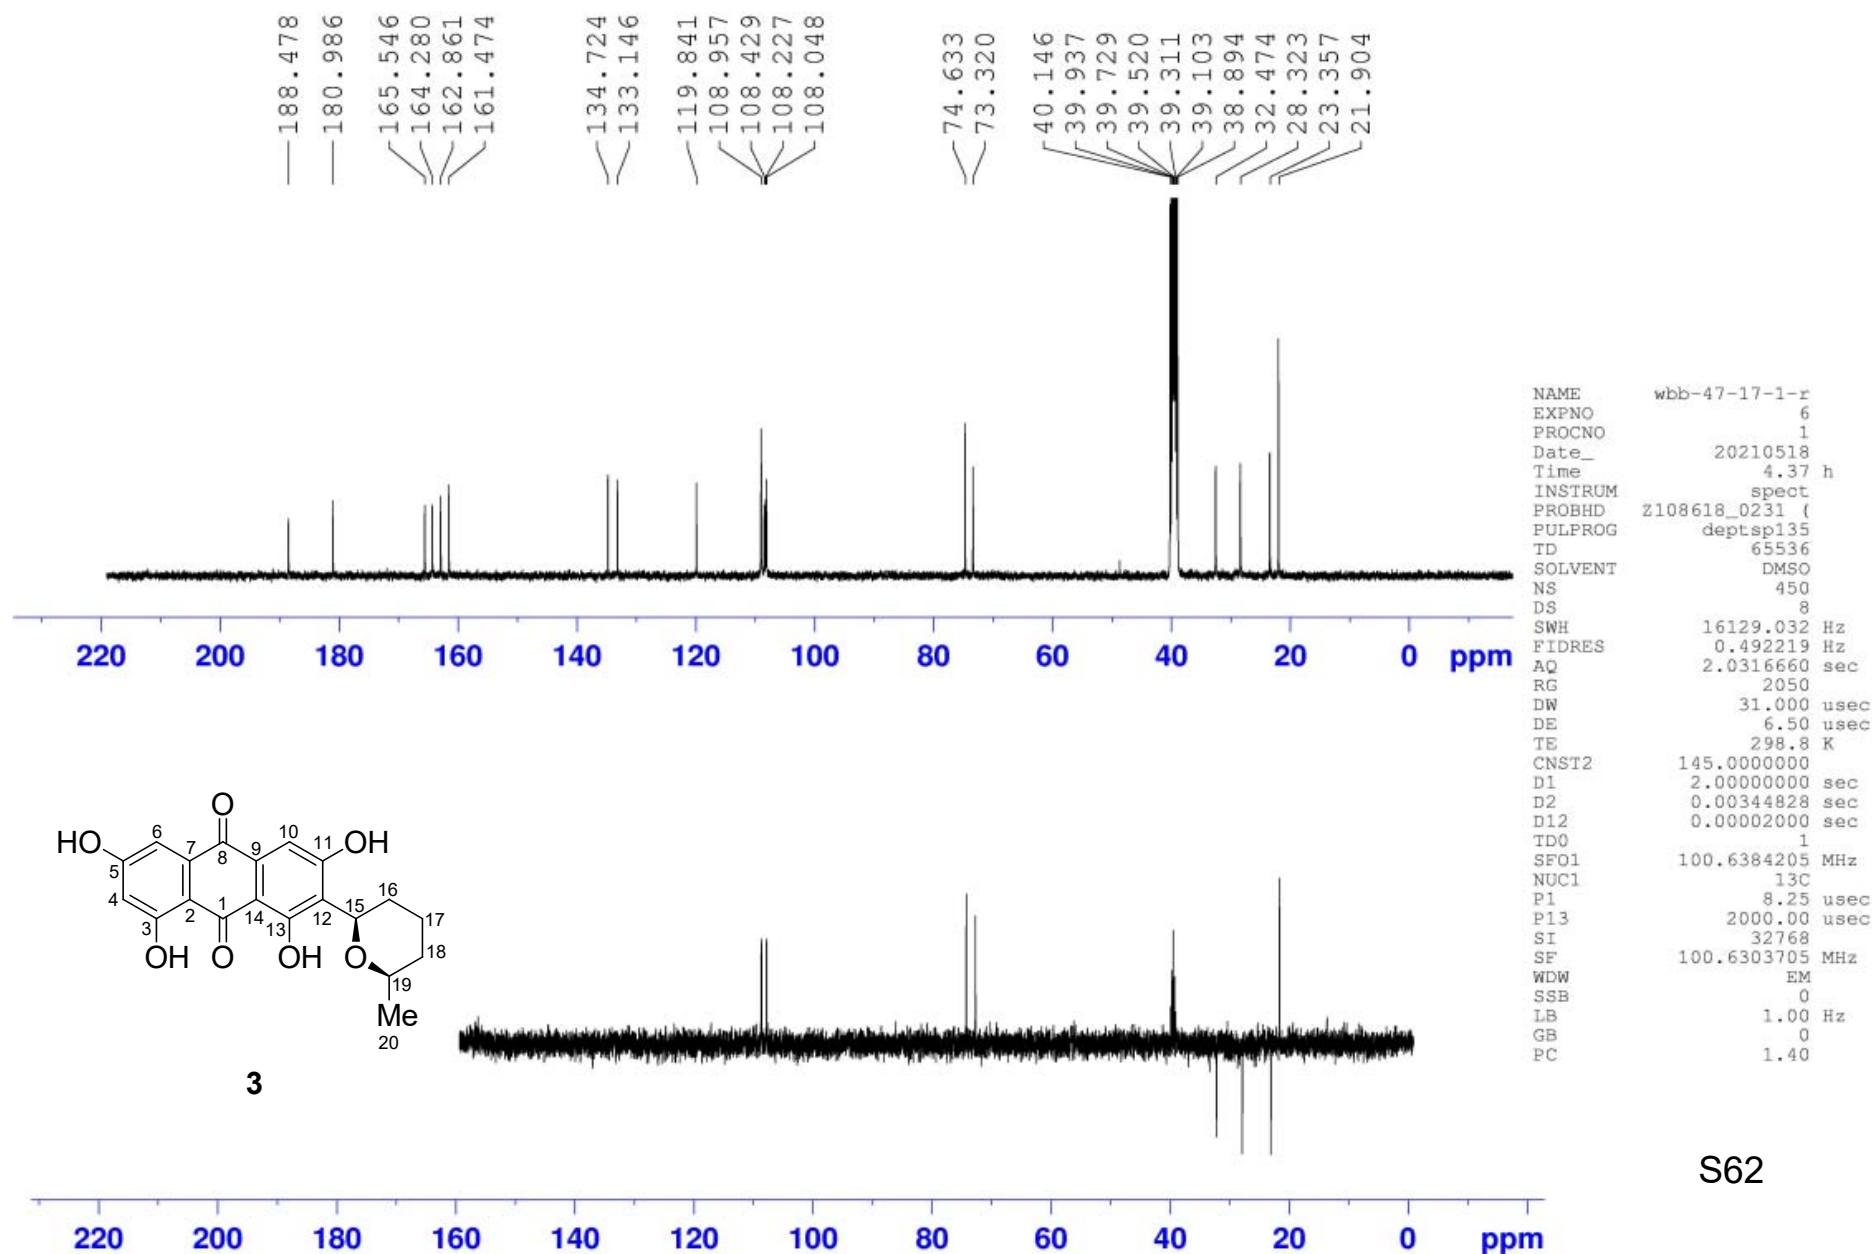

DEPT135 (100 MHz) spectrum of **3** in DMSO- $d_6$

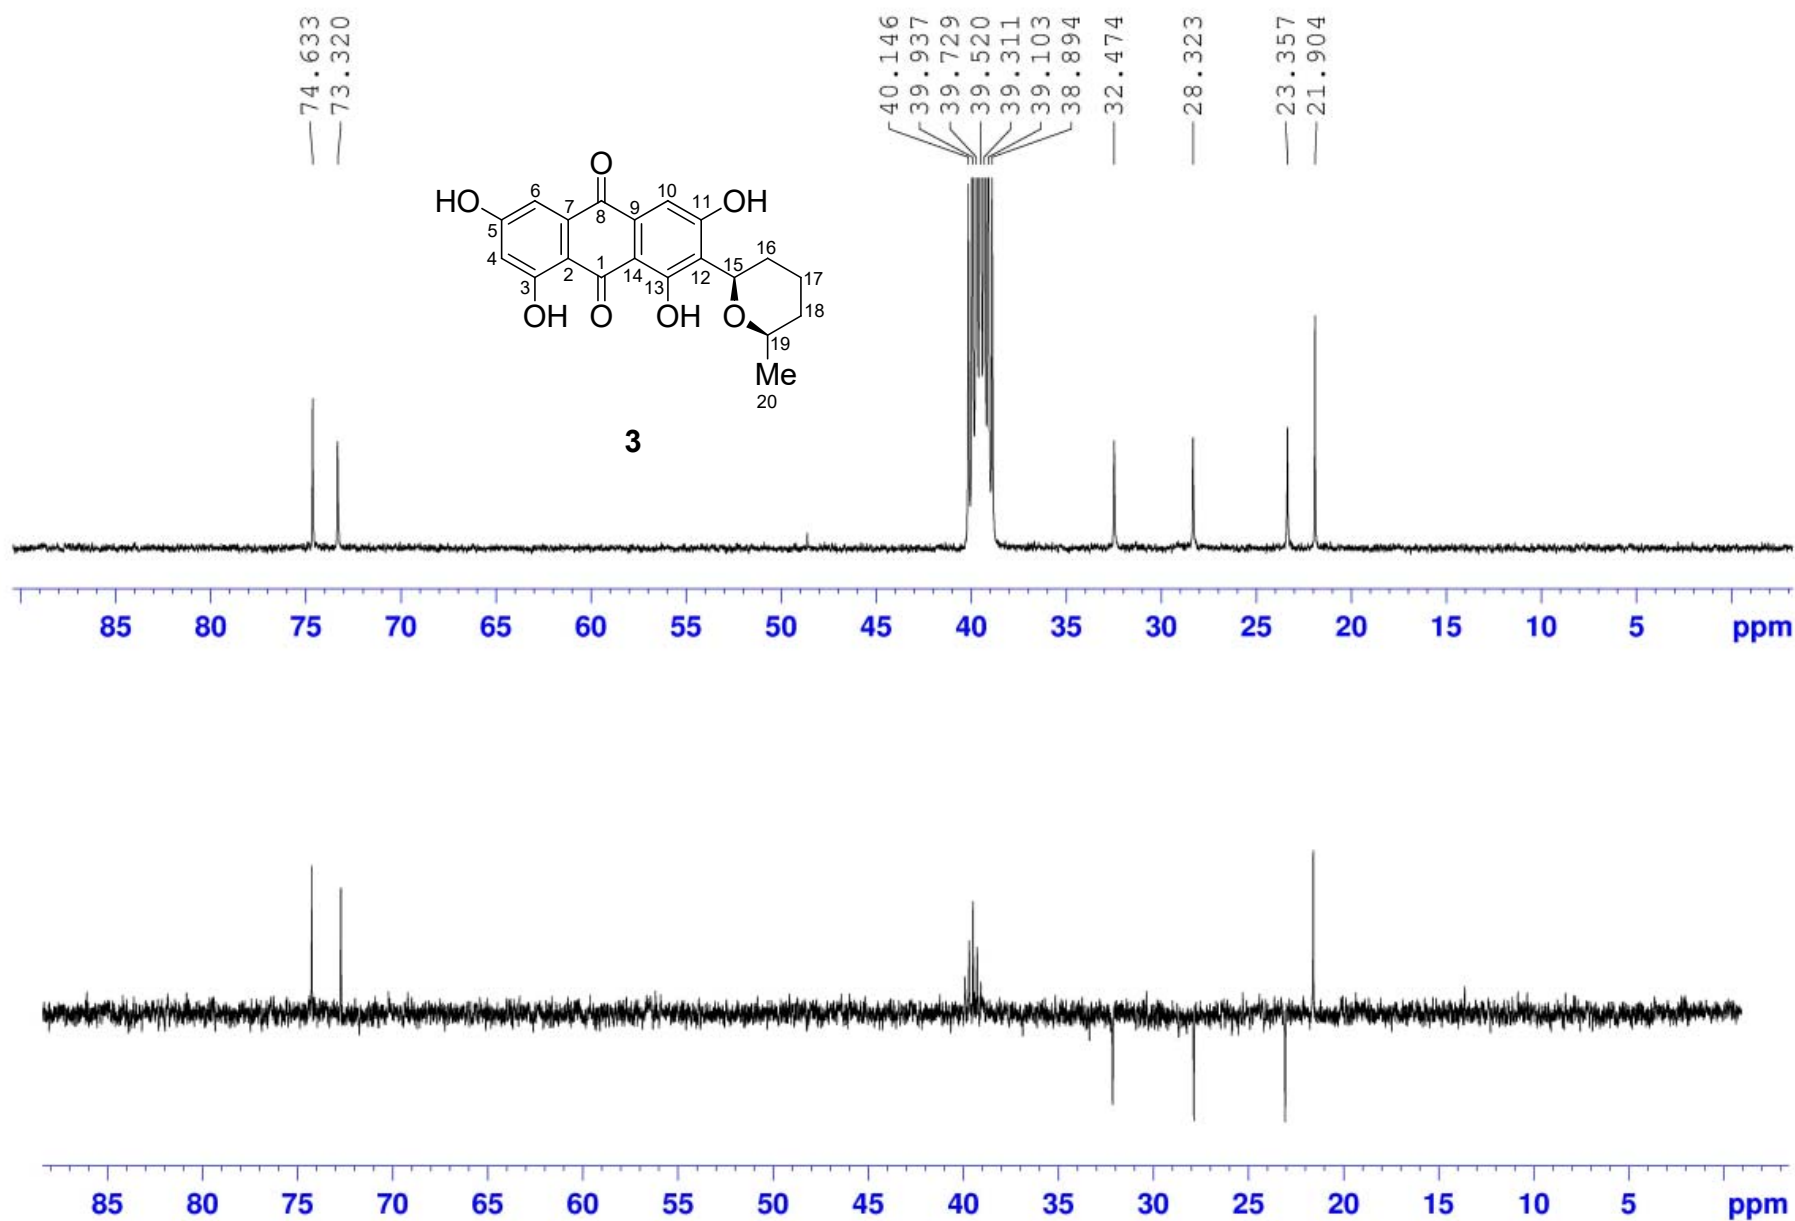

DEPT135 (100 MHz) spectrum of **3** in DMSO- $d_6$

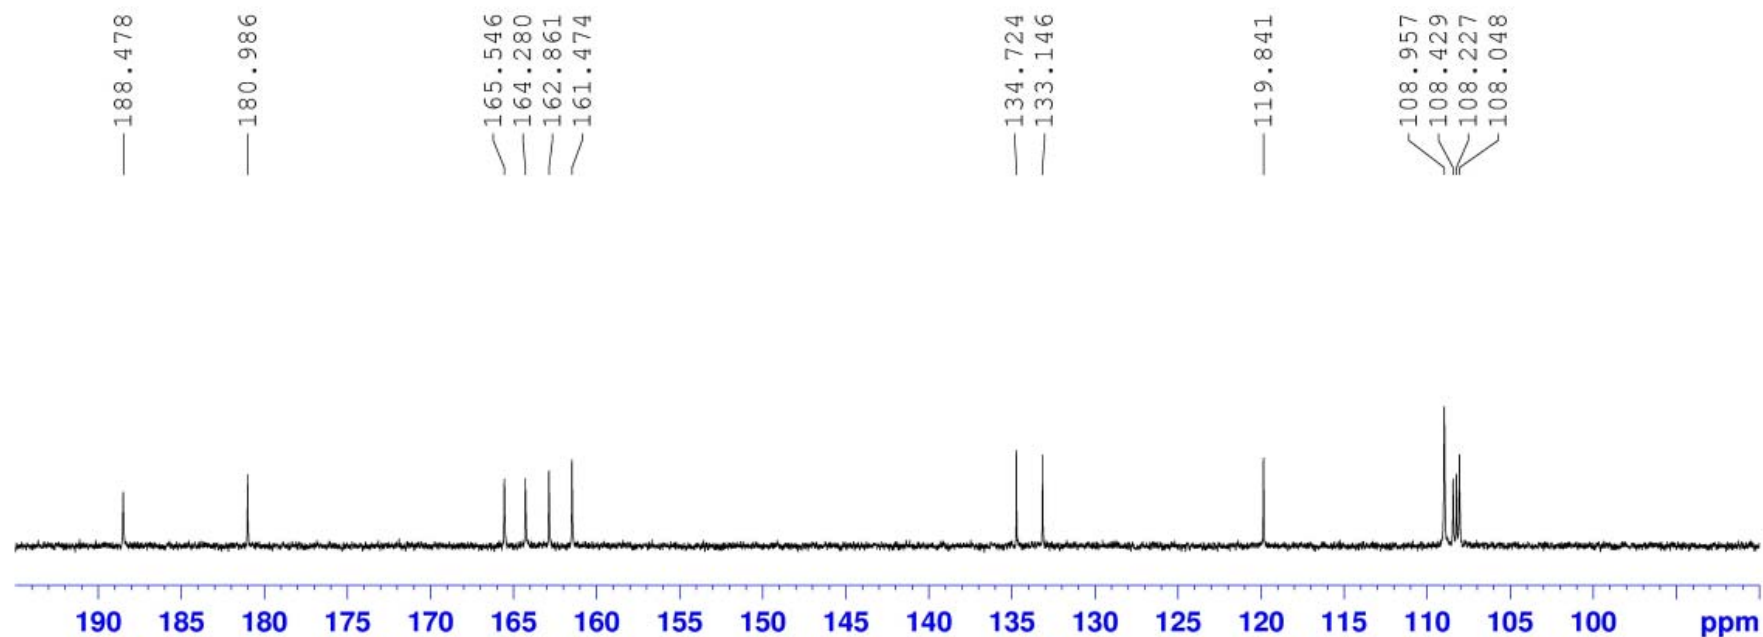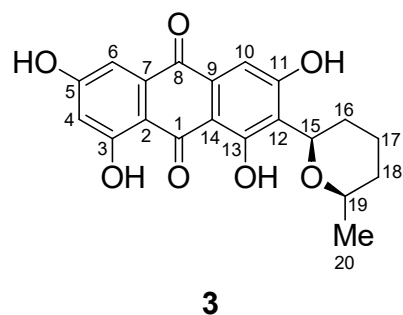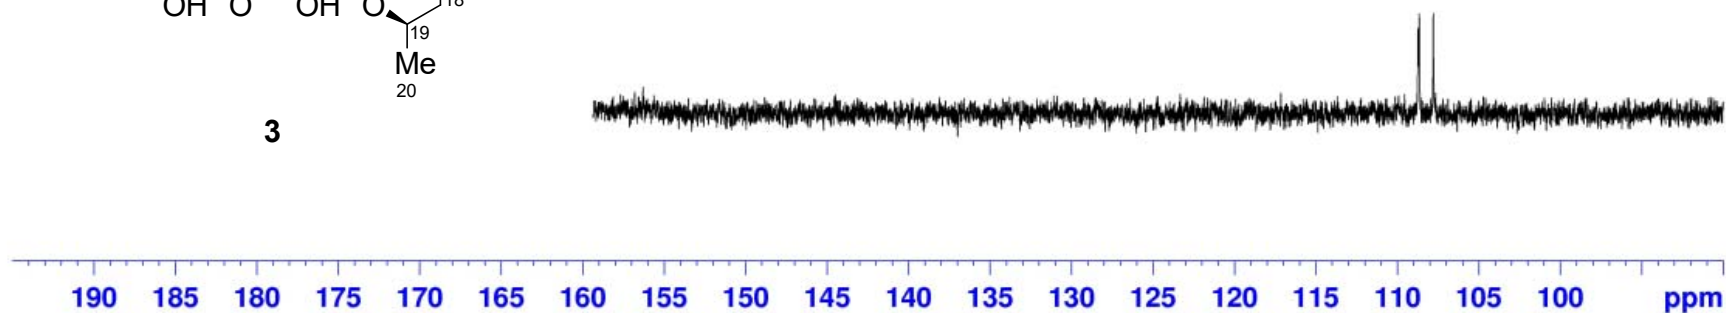

$^1\text{H}$ - $^1\text{H}$  COSY (400 MHz) spectrum of **3** in  $\text{DMSO}-d_6$

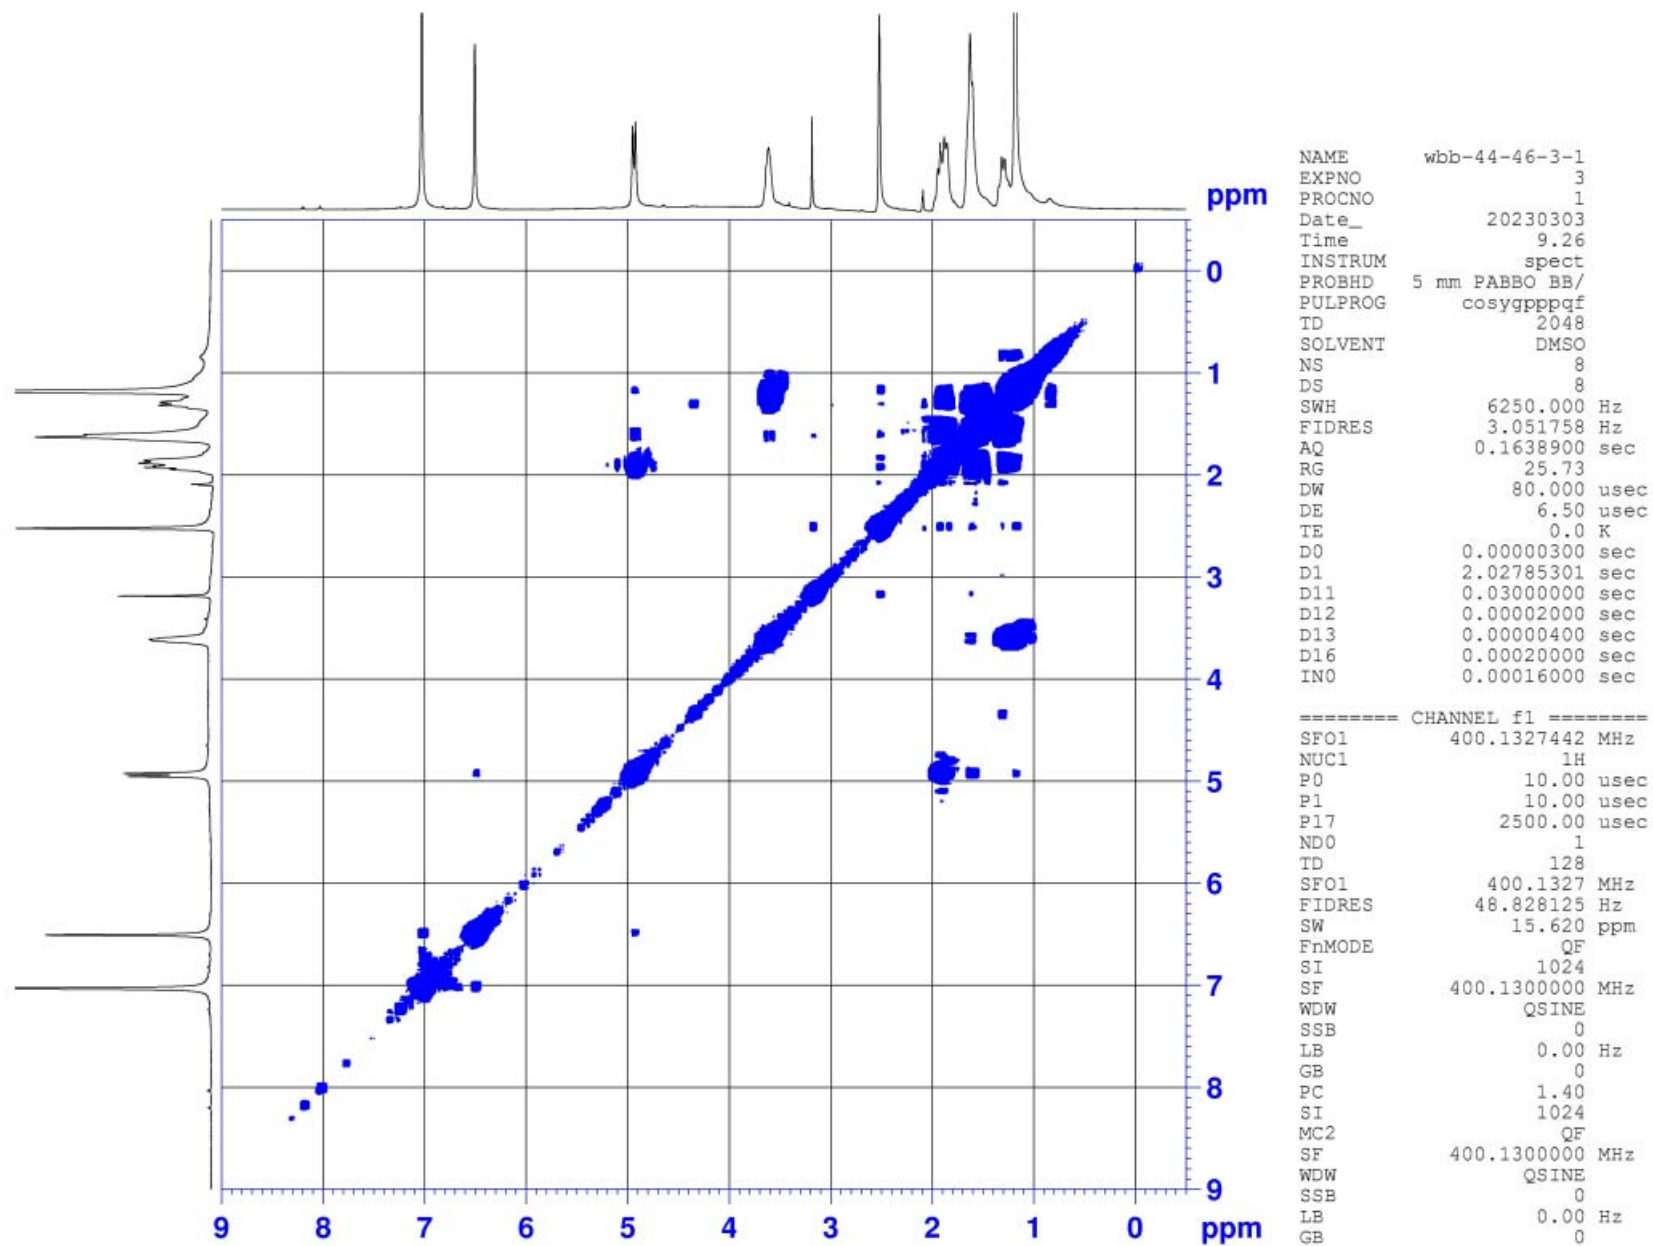



$^1\text{H}$ - $^1\text{H}$  COSY (400 MHz) spectrum of **3** in  $\text{DMSO-}d_6$

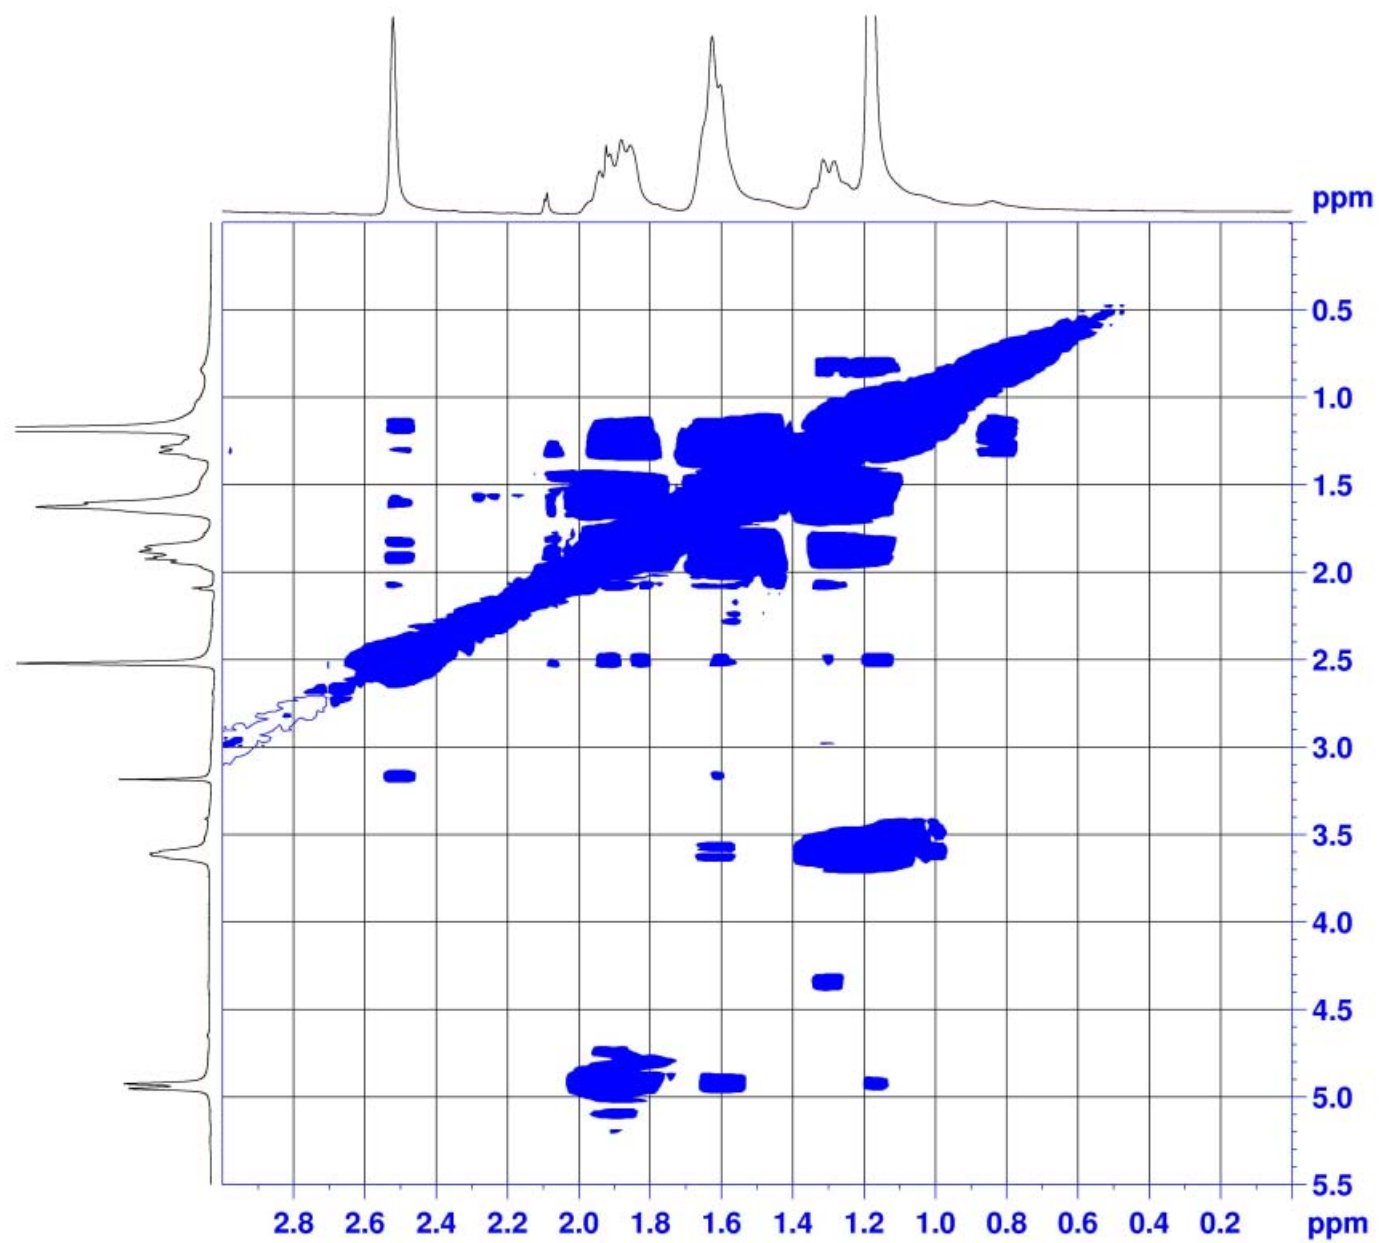

$^1\text{H}$ - $^1\text{H}$  COSY (400 MHz) spectrum of **3** in  $\text{DMSO-}d_6$

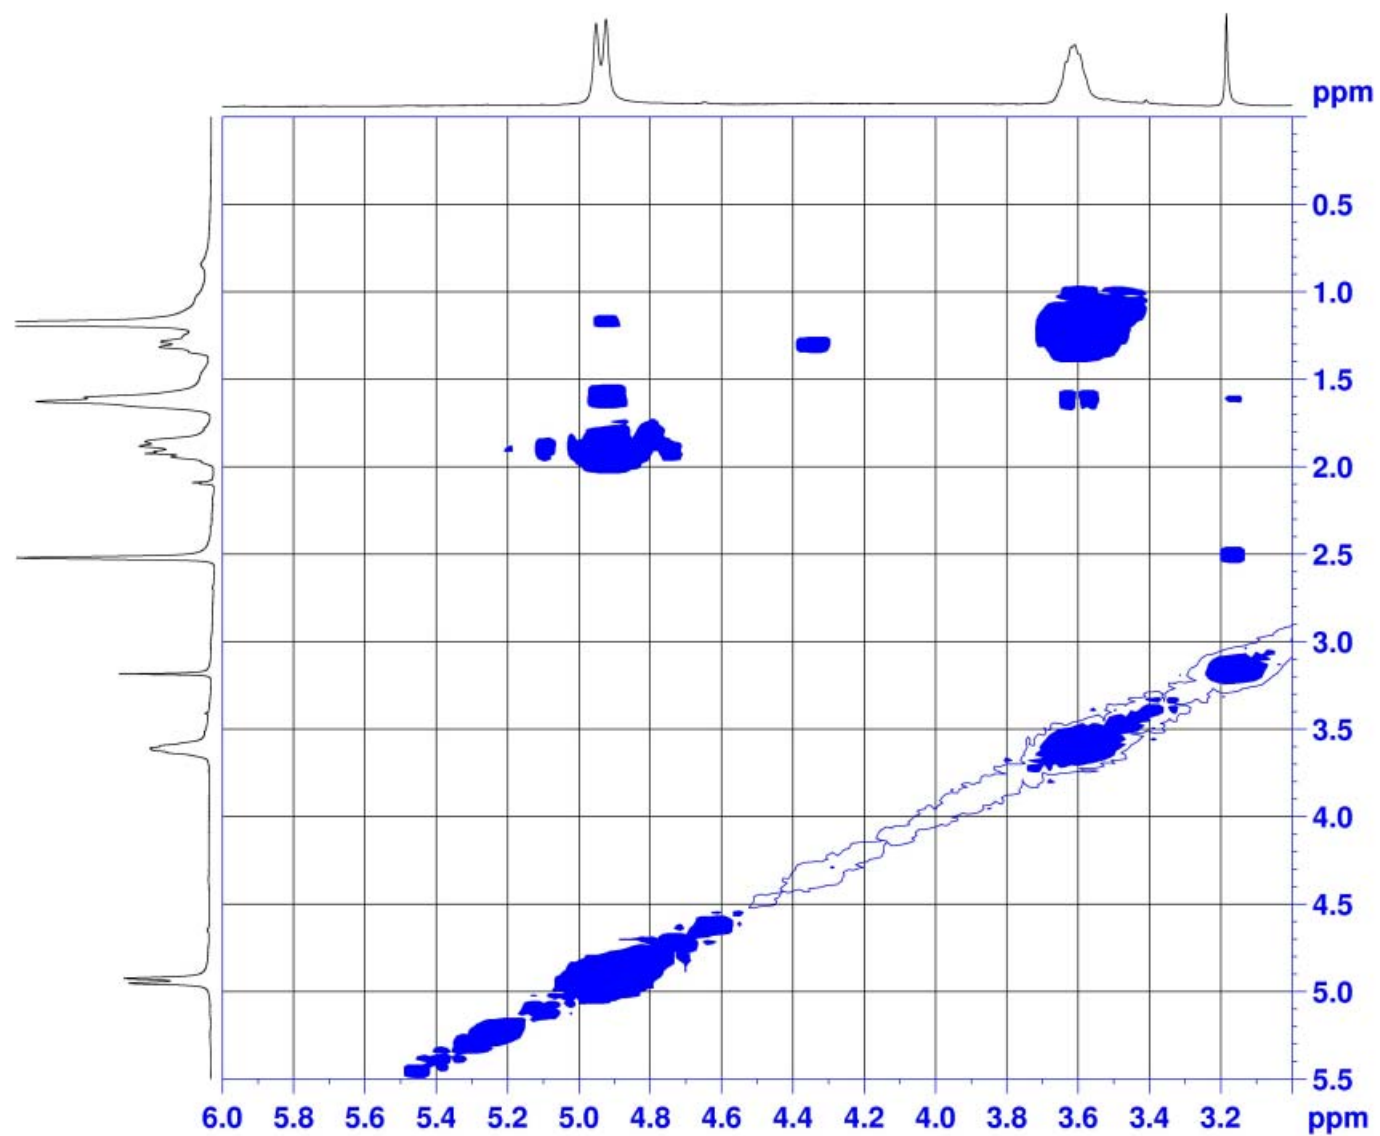

# HSQC (400 MHz) spectrum of **3** in DMSO-*d*<sub>6</sub>

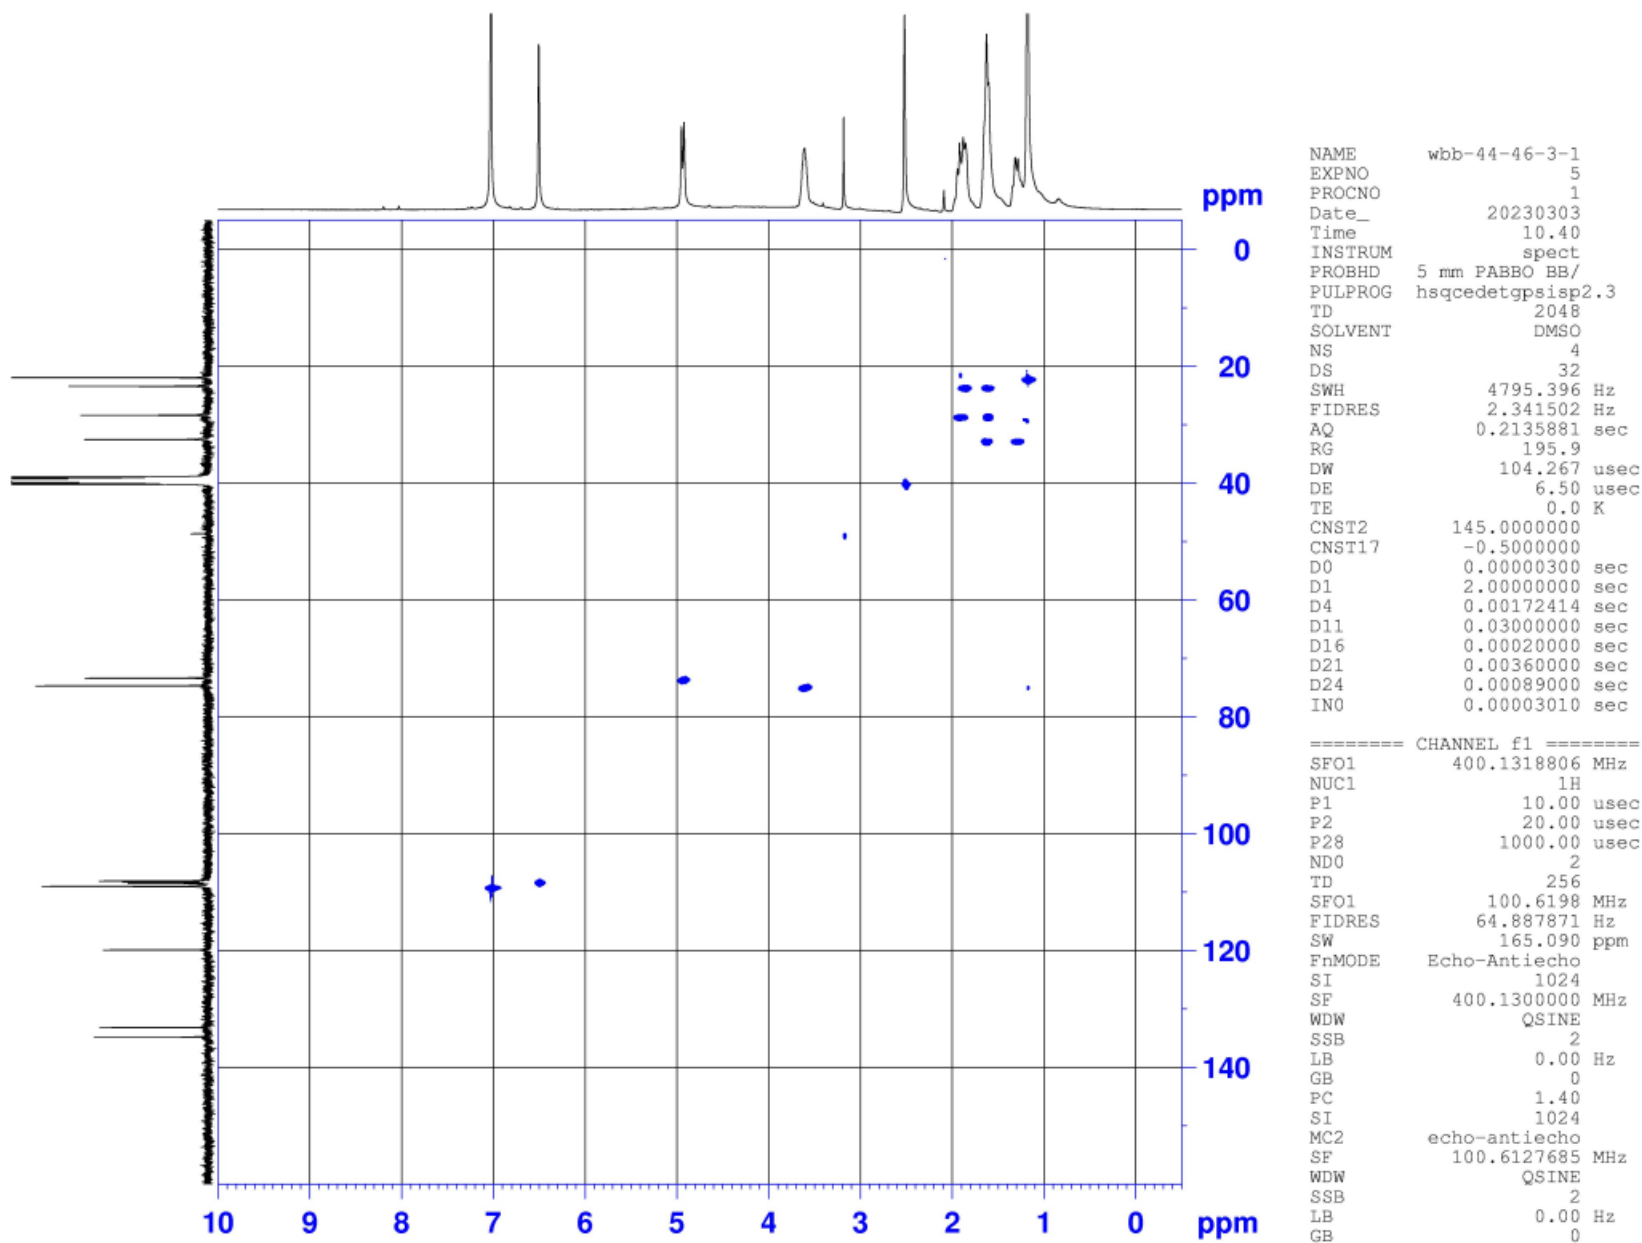

HSQC (400 MHz) spectrum of **3** in DMSO- $d_6$

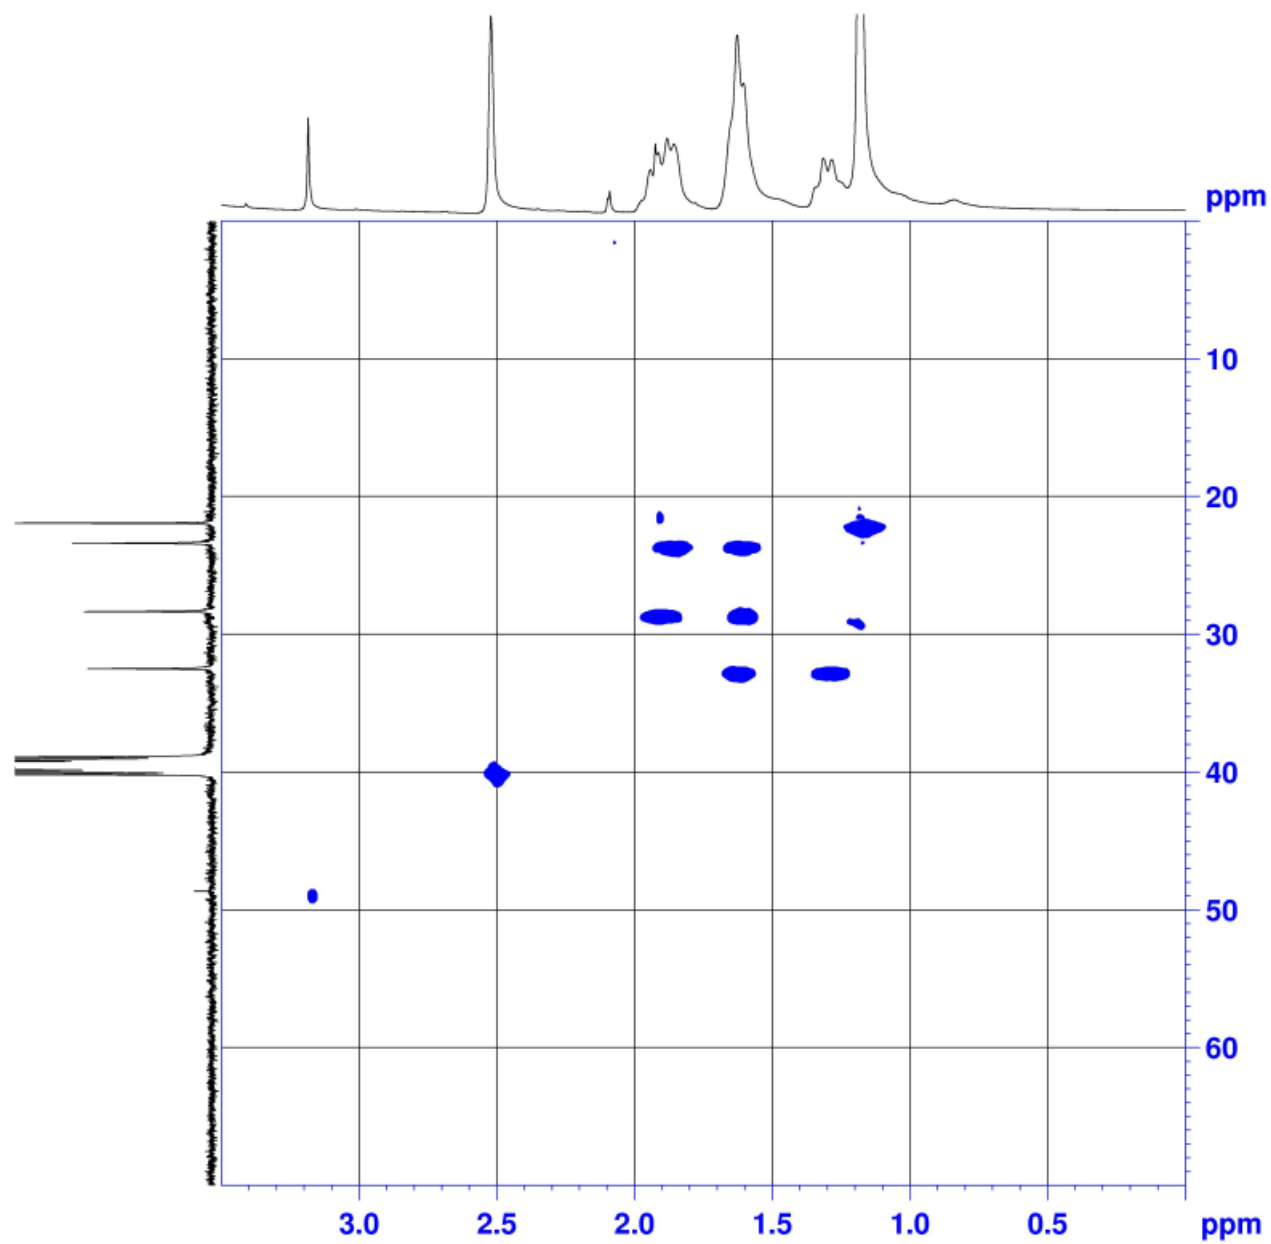

HSQC (400 MHz) spectrum of **3** in DMSO- $d_6$

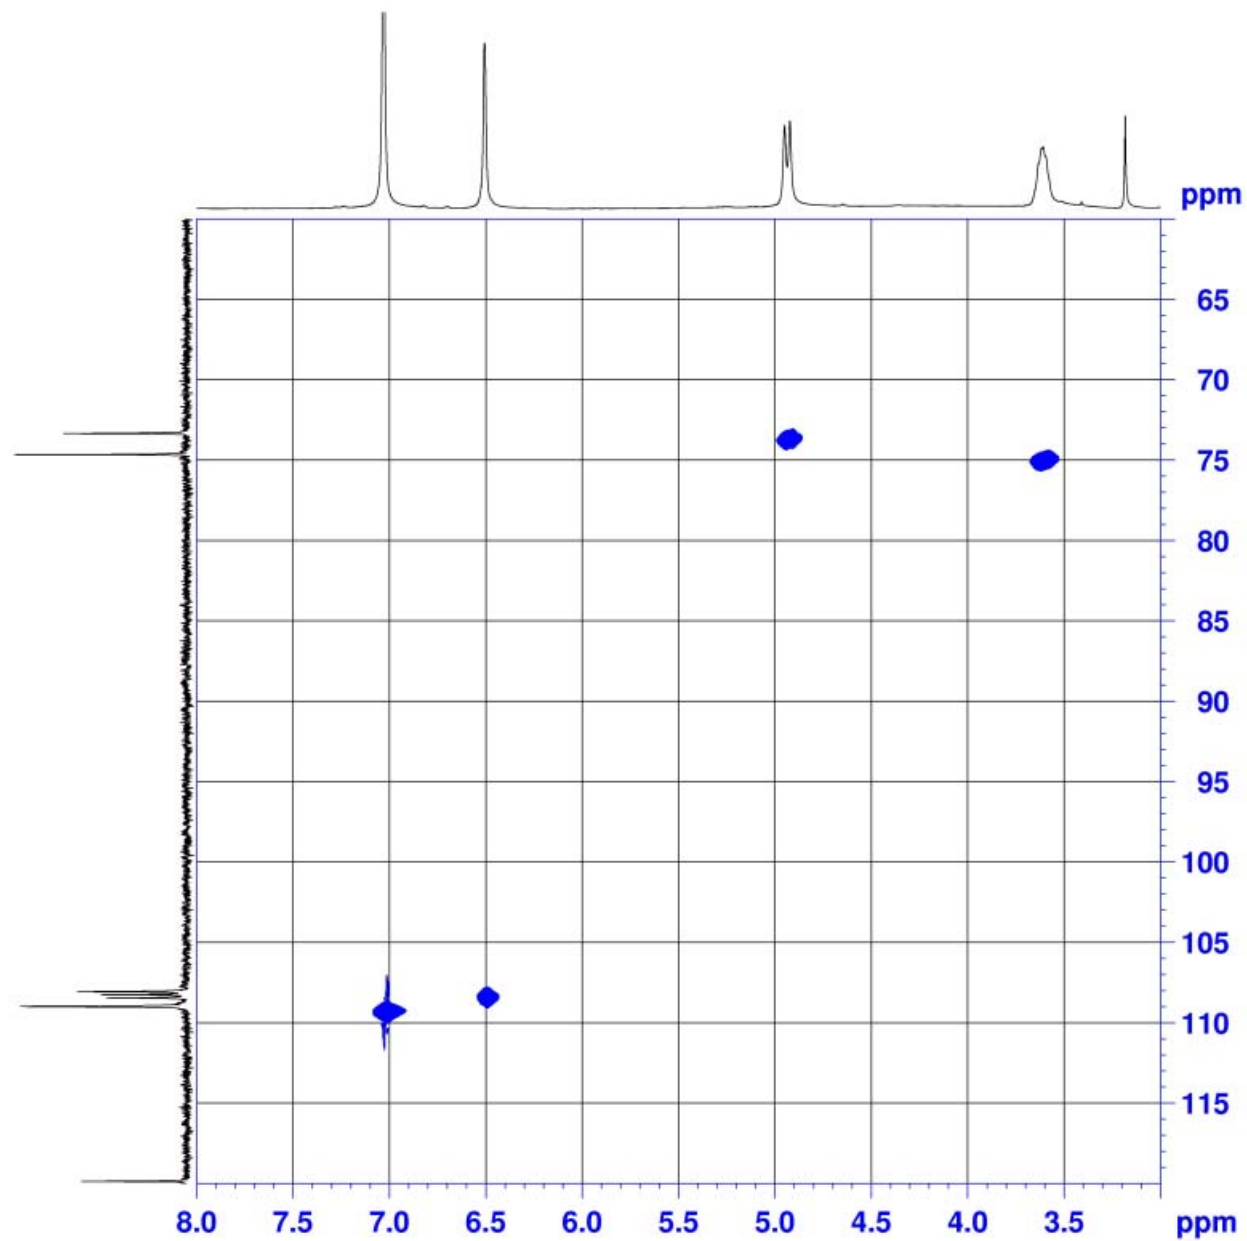

# HMBC (400 MHz) spectrum of **3** in DMSO-*d*<sub>6</sub>

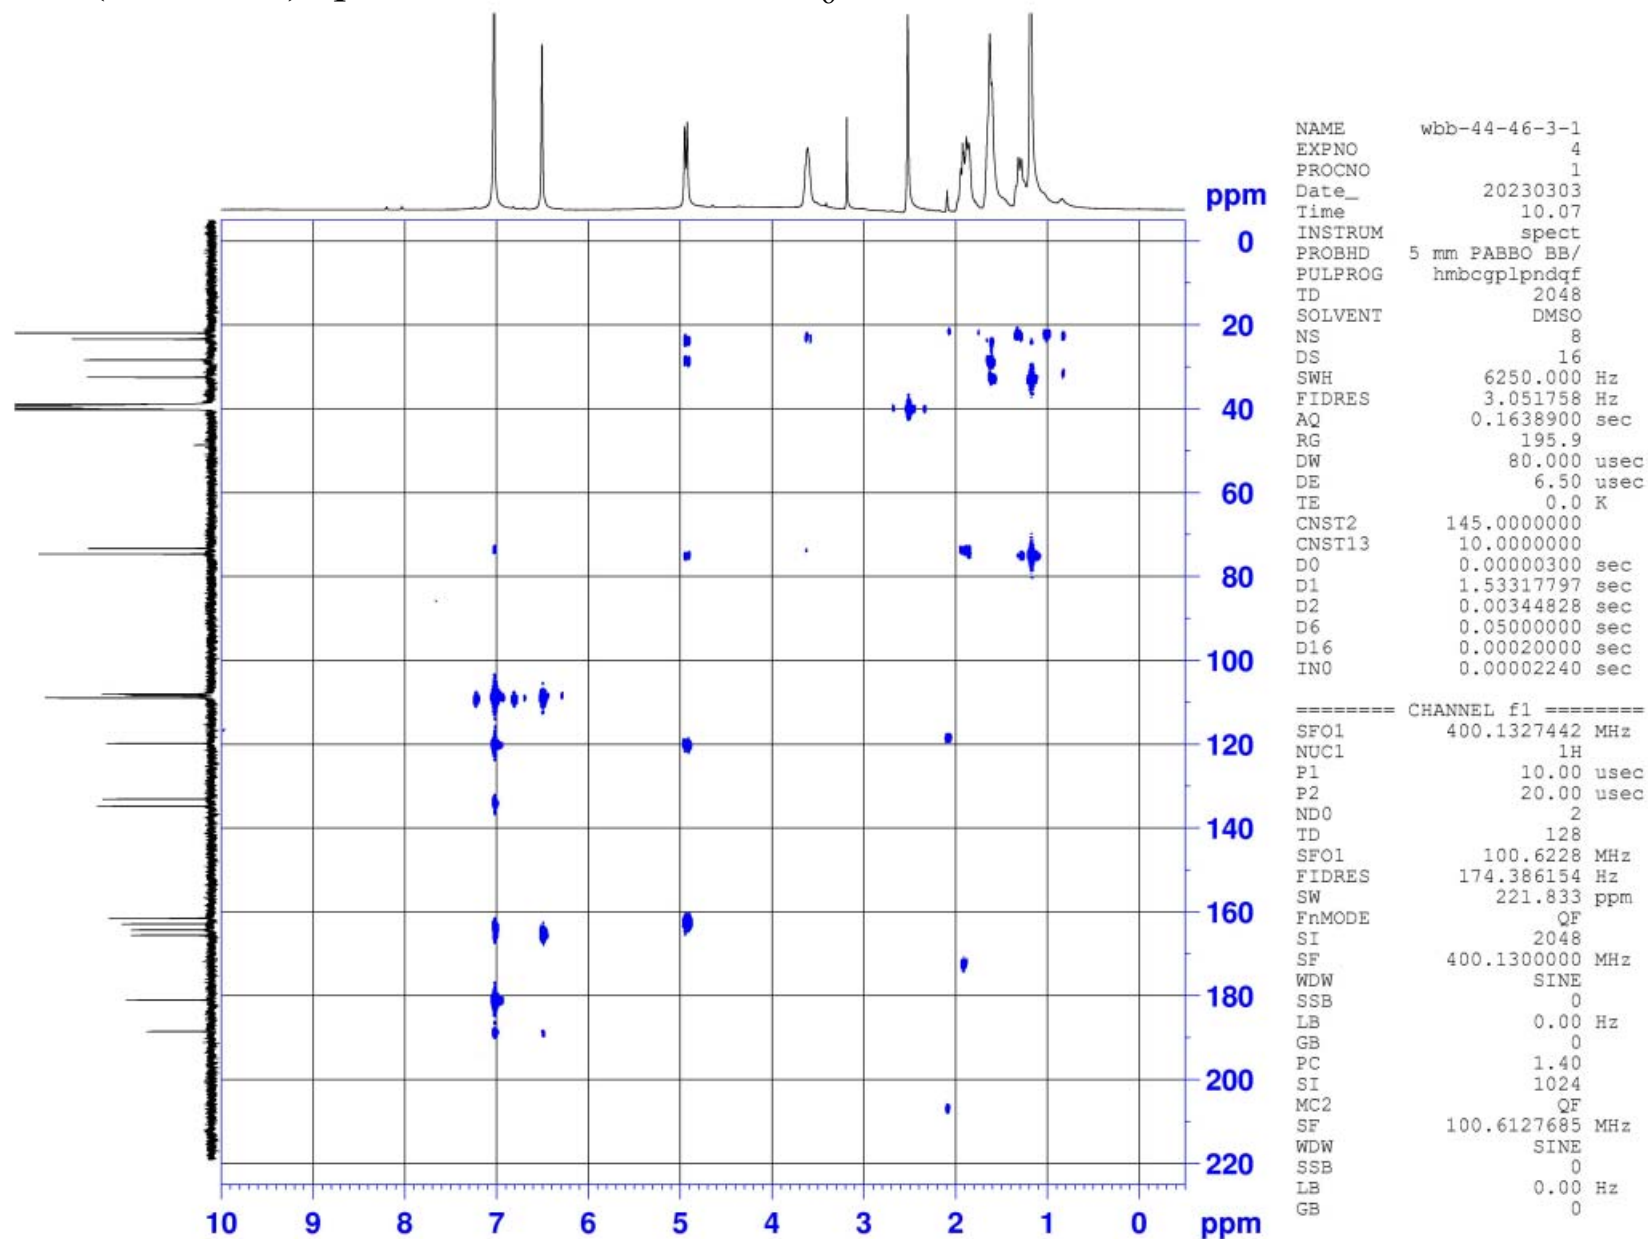

HMBC (400 MHz) spectrum of **3** in DMSO- $d_6$

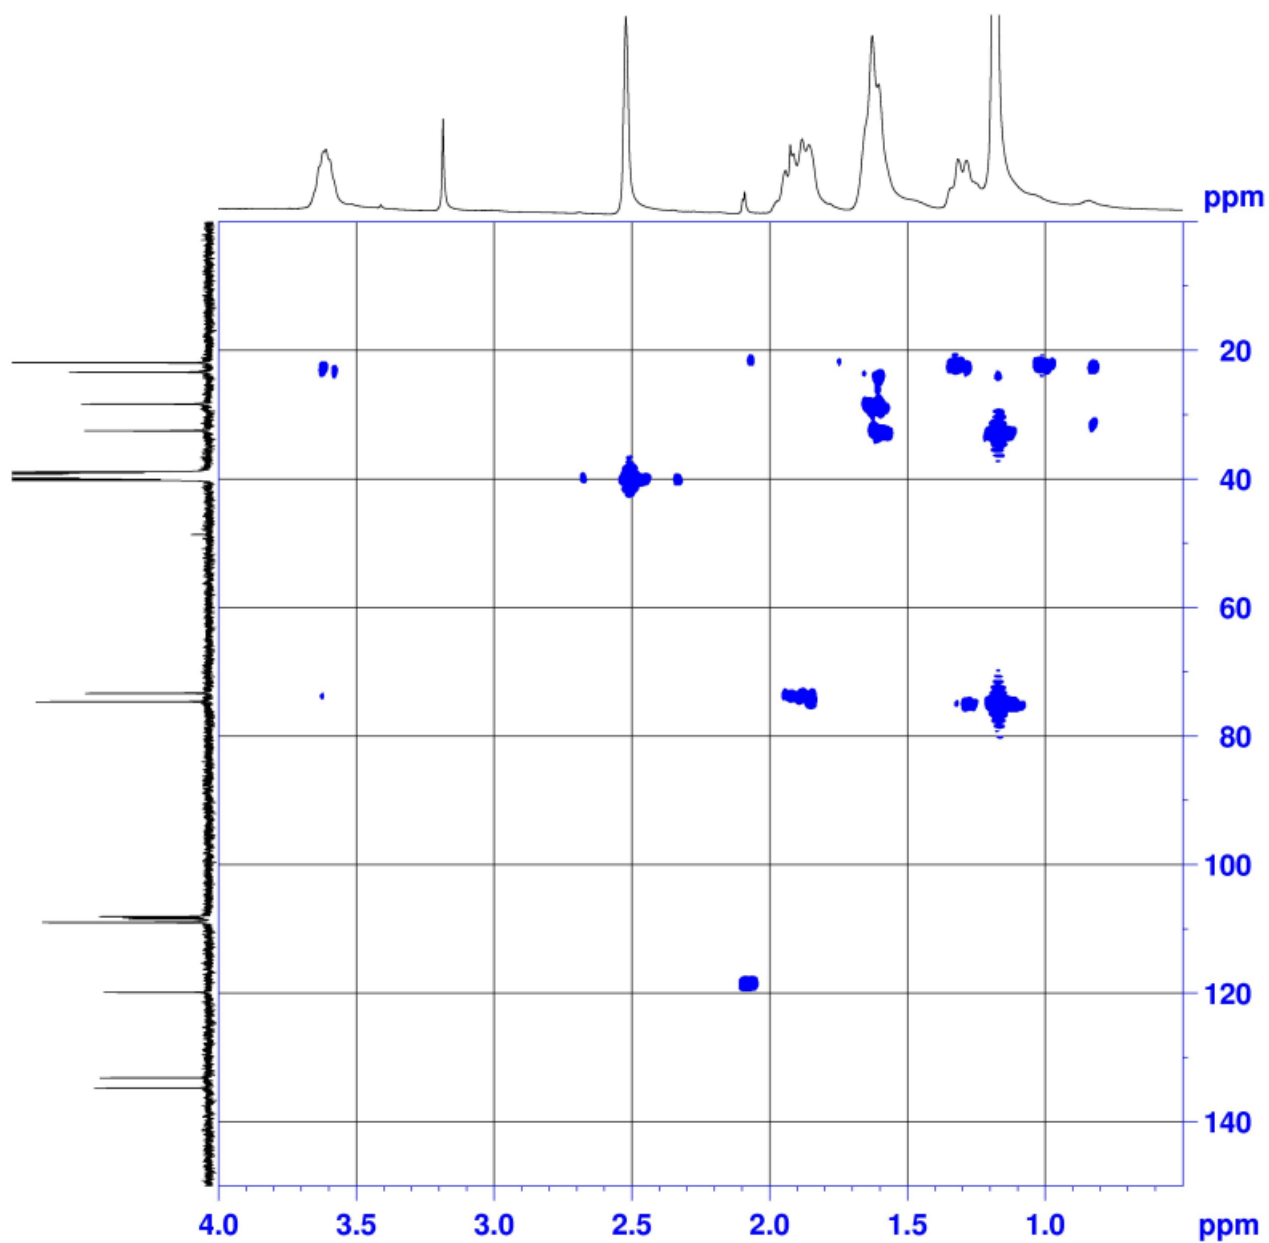

HMBC (400 MHz) spectrum of **3** in DMSO- $d_6$

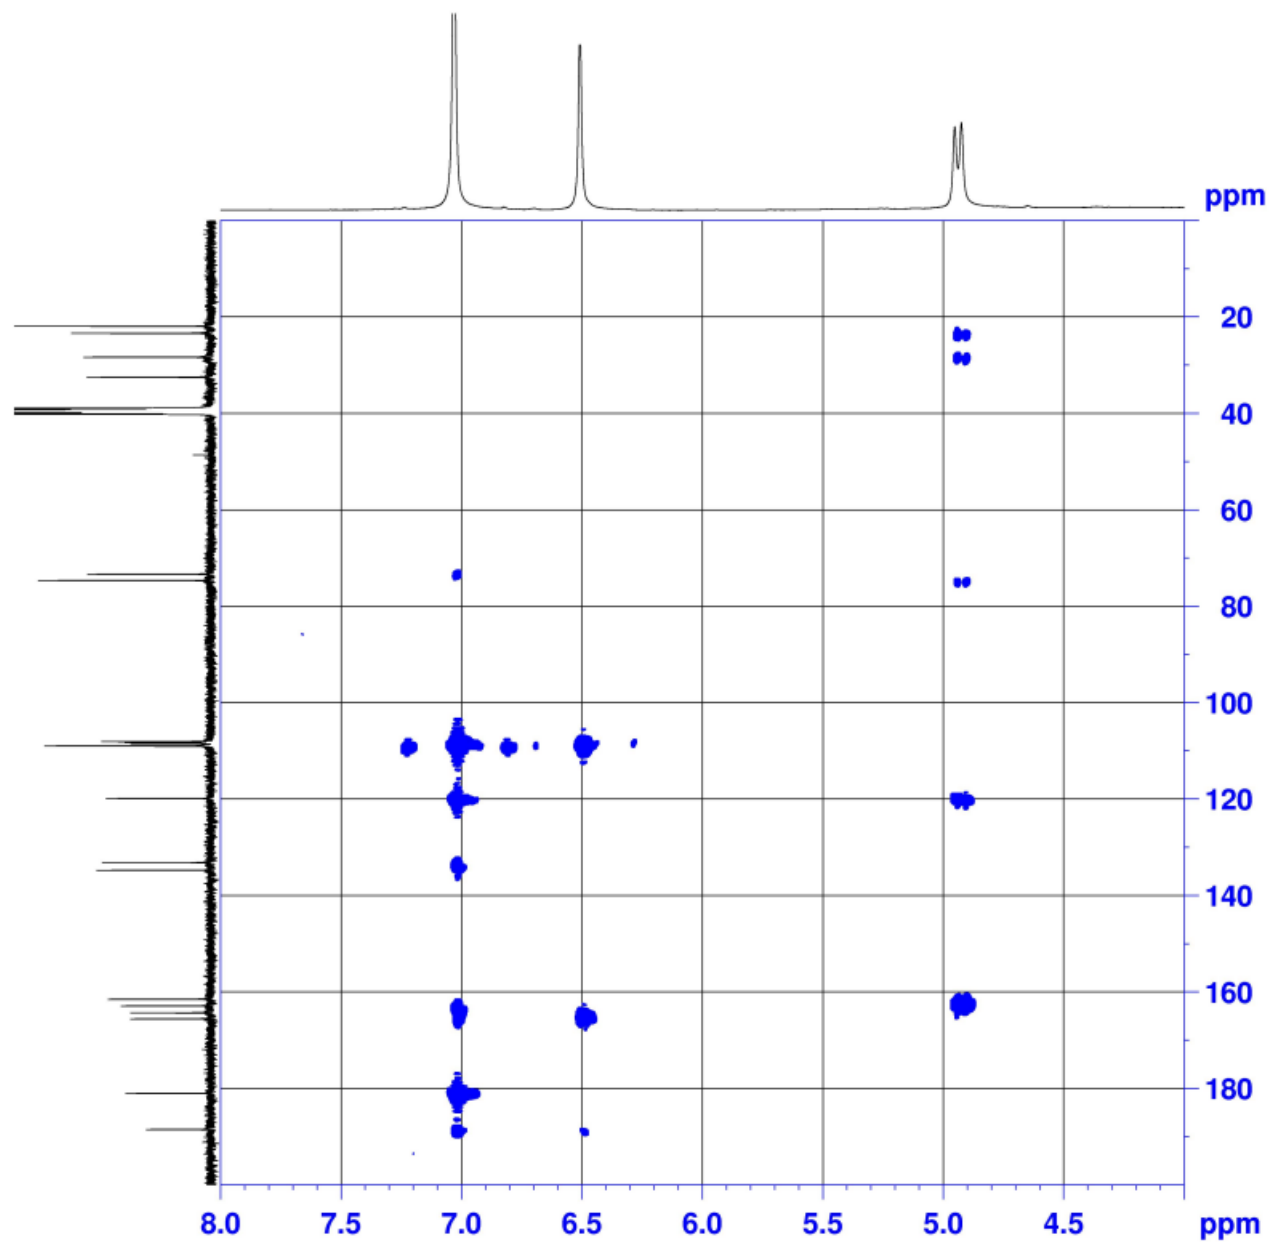



# NOESY (400 MHz) spectrum of **3** in DMSO-*d*<sub>6</sub>

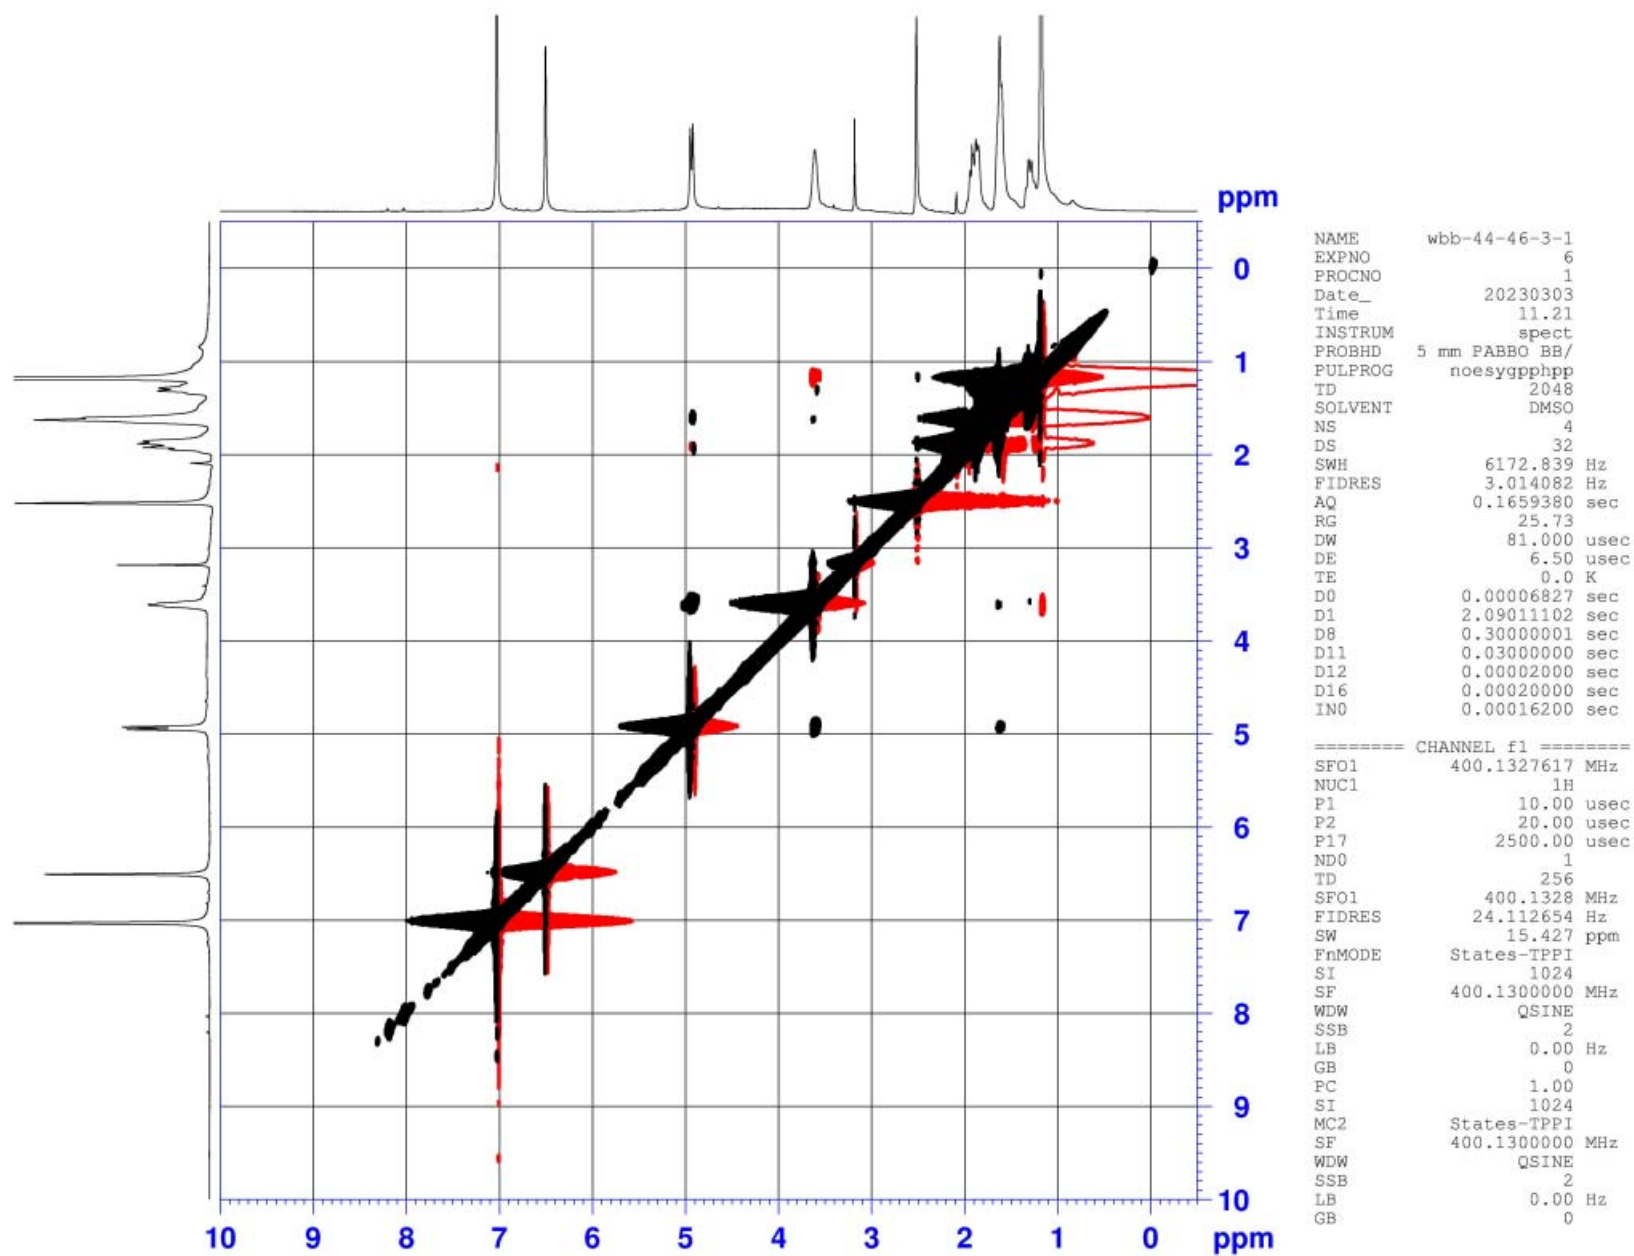

NOESY (400 MHz) spectrum of **3** in DMSO- $d_6$

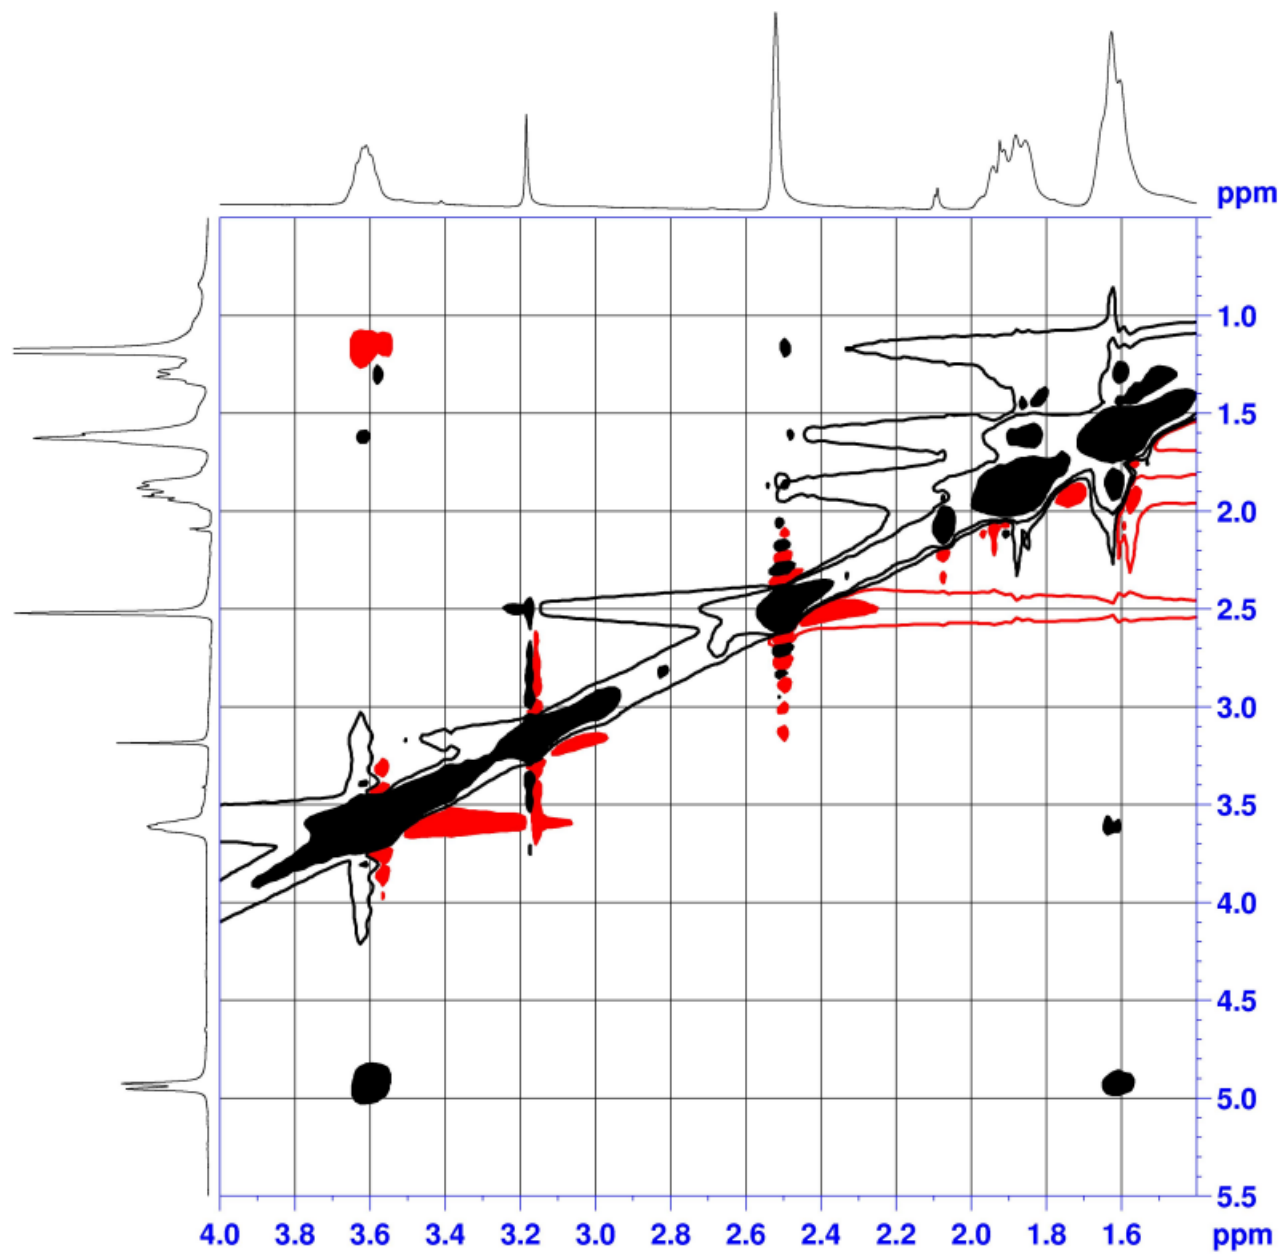

# HR-ESIMS for 4

## Mass Spectrum SmartFormula Report

### Analysis Info

Analysis Name D:\Data\MS\data\202110\wubinbin\_WBB-145-D-R-6\_pos\_51\_01\_11733.d  
 Method LC\_Direct Infusion\_pos\_70-500mz.m  
 Sample Name wubinbin\_WBB-145-D-R-6\_pos  
 Comment

Acquisition Date 10/27/2021 4:38:12 PM  
 Operator SCSIO  
 Instrument maXis 255552.00029

### Acquisition Parameter

|             |          |                      |          |                  |           |
|-------------|----------|----------------------|----------|------------------|-----------|
| Source Type | ESI      | Ion Polarity         | Positive | Set Nebulizer    | 0.4 Bar   |
| Focus       | Active   | Set Capillary        | 4500 V   | Set Dry Heater   | 180 °C    |
| Scan Begin  | 70 m/z   | Set End Plate Offset | -500 V   | Set Dry Gas      | 4.0 l/min |
| Scan End    | 1500 m/z | Set Charging Voltage | 0 V      | Set Divert Valve | Waste     |
|             |          | Set Corona           | 0 nA     | Set APCI Heater  | 0 °C      |

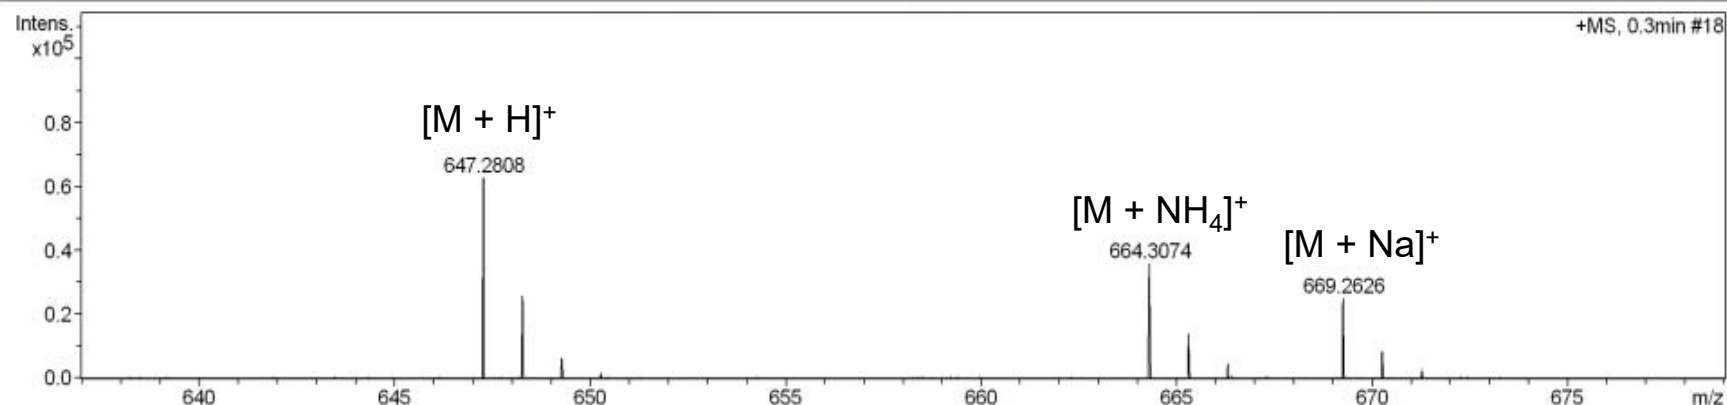

| Meas. m/z | # | Ion Formula   | Score  | m/z      | err [ppm] | err [mDa] | mSigma | rdb  | e <sup>-</sup> Conf | N-Rule |
|-----------|---|---------------|--------|----------|-----------|-----------|--------|------|---------------------|--------|
| 647.2808  | 1 | C32H43N2O12   | 100.00 | 647.2811 | -0.4      | -0.2      | 26.3   | 12.5 | even                | ok     |
| 669.2626  | 1 | C32H42N2NaO12 | 100.00 | 669.2630 | -0.6      | -0.4      | 14.4   | 12.5 | even                | ok     |

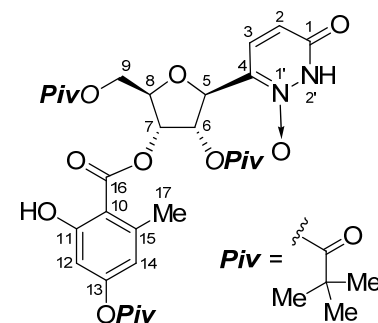

4

S76

# HR-ESIMS for 4

## Generic Display Report

### Analysis Info

Analysis Name D:\Data\MS\data\202110\wubinbin\_WBB-145-D-R-6\_pos\_51\_01\_11733.d  
Method LC\_Direct Infusion\_pos\_70-500mz.m  
Sample Name wubinbin\_WBB-145-D-R-6\_pos  
Comment

Acquisition Date 10/27/2021 4:38:12 PM  
Operator SCSIO  
Instrument maXis

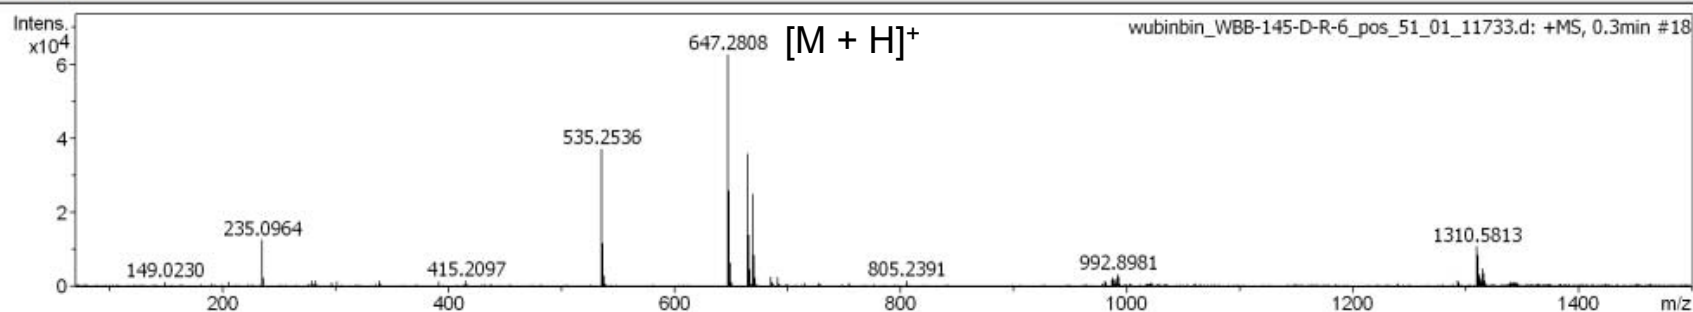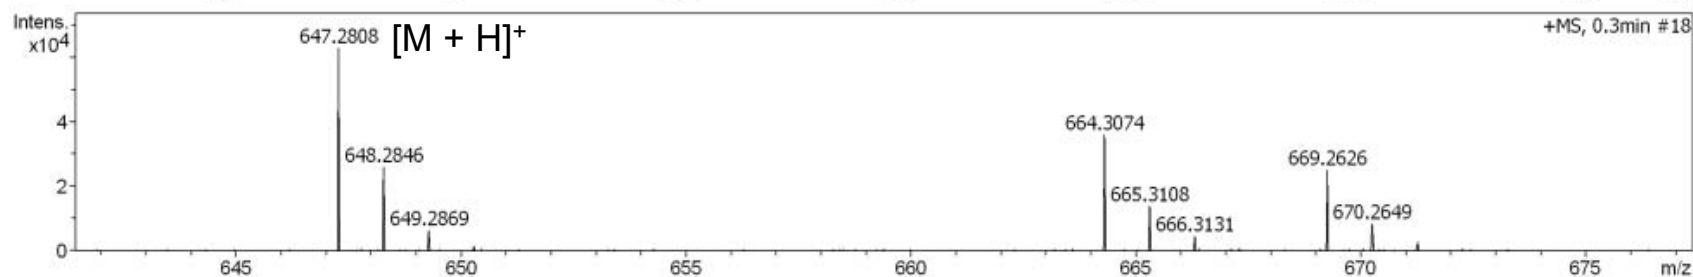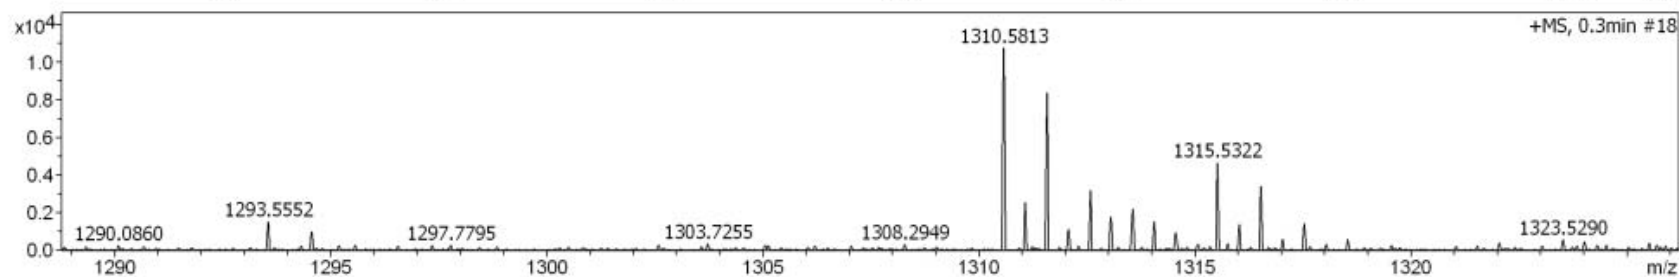

$^1\text{H}$  (700 MHz) NMR spectrum of **4** in  $\text{CDCl}_3$

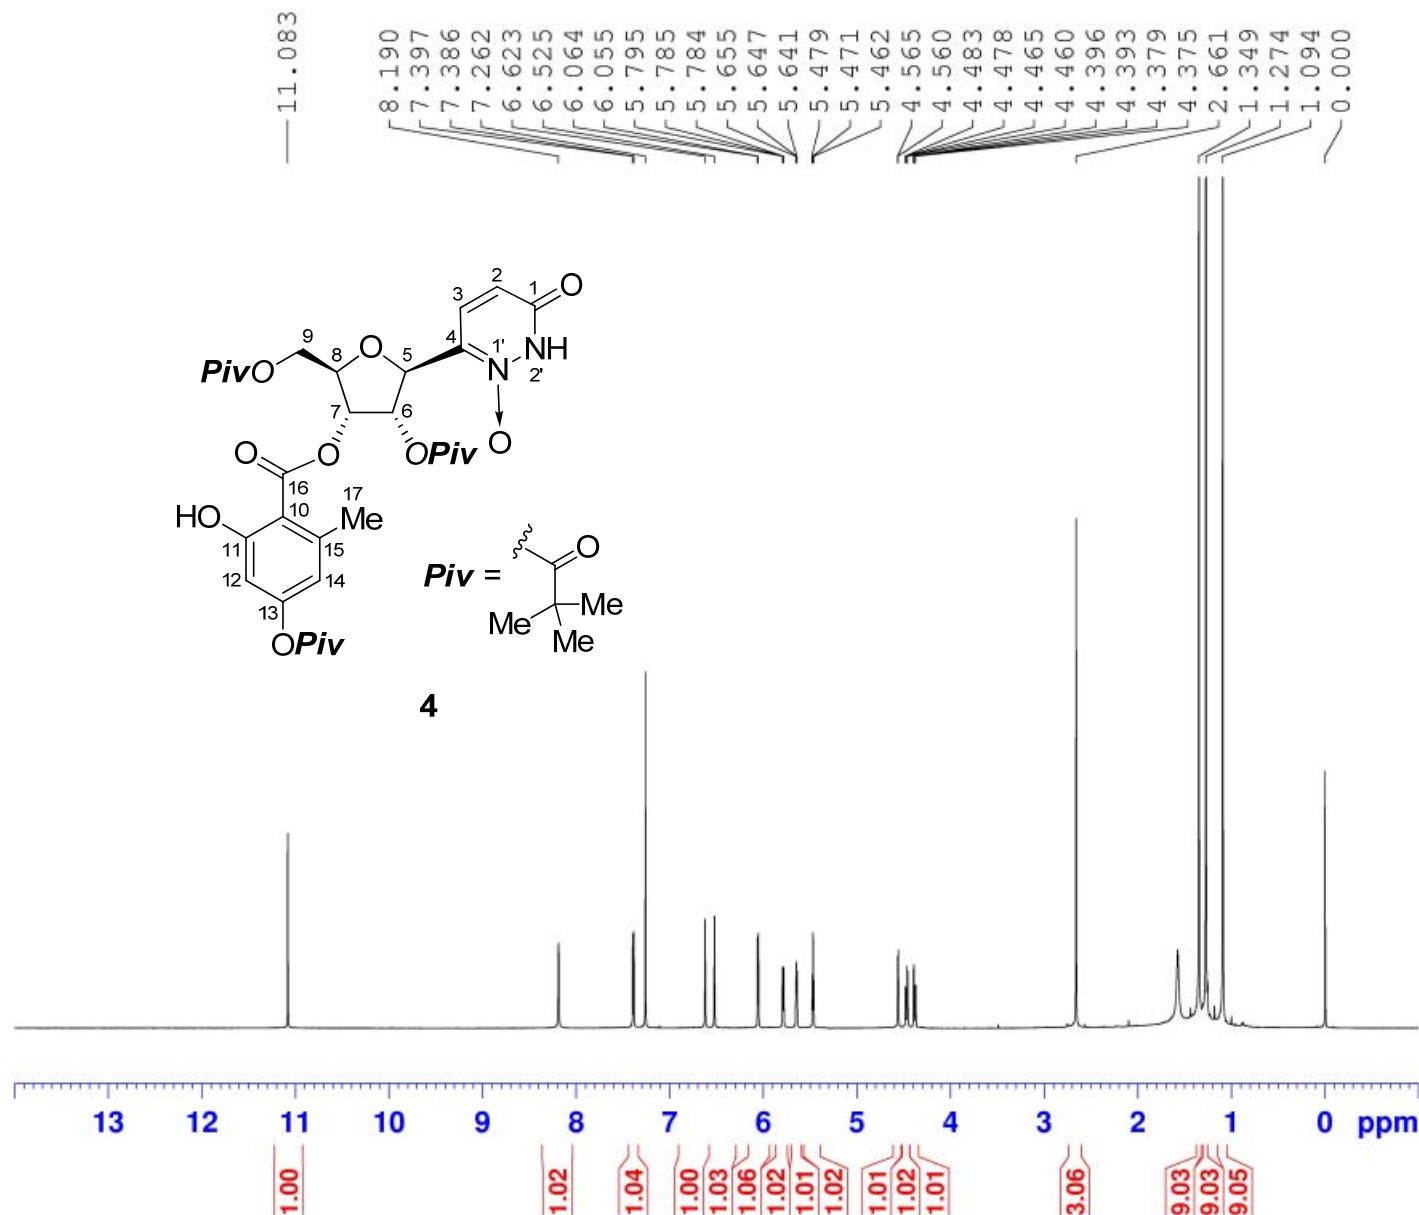

NAME wubinbin-145D-R-6-1  
 EXPNO 23  
 PROCNO 1  
 Date\_ 20211031  
 Time 15.25 h  
 INSTRUM spect  
 PROBHD Z120187\_0028 (   
 PULPROG zg30  
 TD 65536  
 SOLVENT  $\text{CDCl}_3$   
 NS 16  
 DS 2  
 SWH 14097.744 Hz  
 FIDRES 0.430229 Hz  
 AQ 2.3243935 sec  
 RG 4.87  
 DW 35.467 usec  
 DE 10.00 usec  
 TE 298.0 K  
 D1 1.00000000 sec  
 TD0 1  
 SFO1 700.1849013 MHz  
 NUC1  $^1\text{H}$   
 P0 2.52 usec  
 P1 7.55 usec  
 SI 65536  
 SF 700.1800162 MHz  
 WDW EM  
 SSB 0  
 LB 0.30 Hz  
 GB 0  
 PC 1.00

$^1\text{H}$  (700 MHz) NMR spectrum of **4** in  $\text{CDCl}_3$

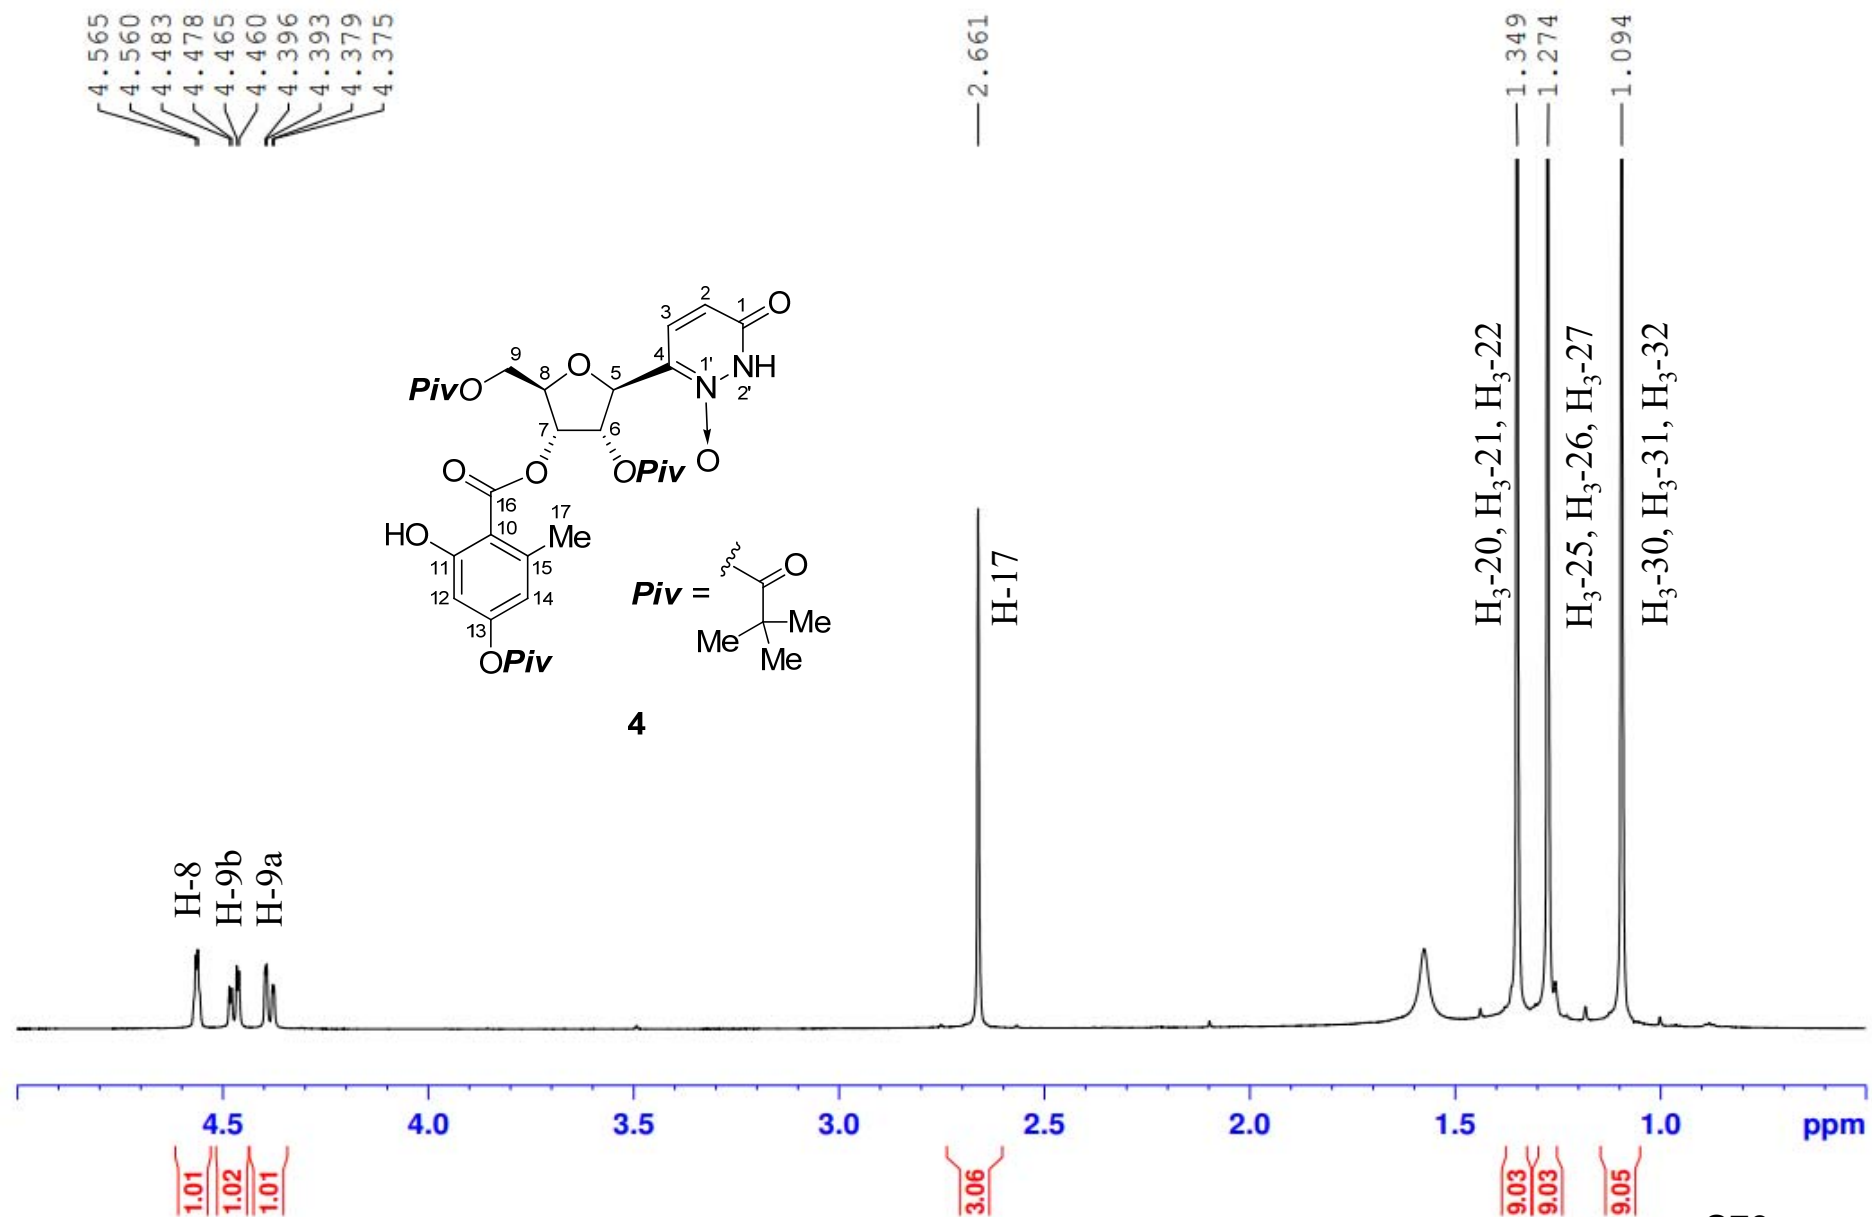

$^1\text{H}$  (700 MHz) NMR spectrum of **4** in  $\text{CDCl}_3$

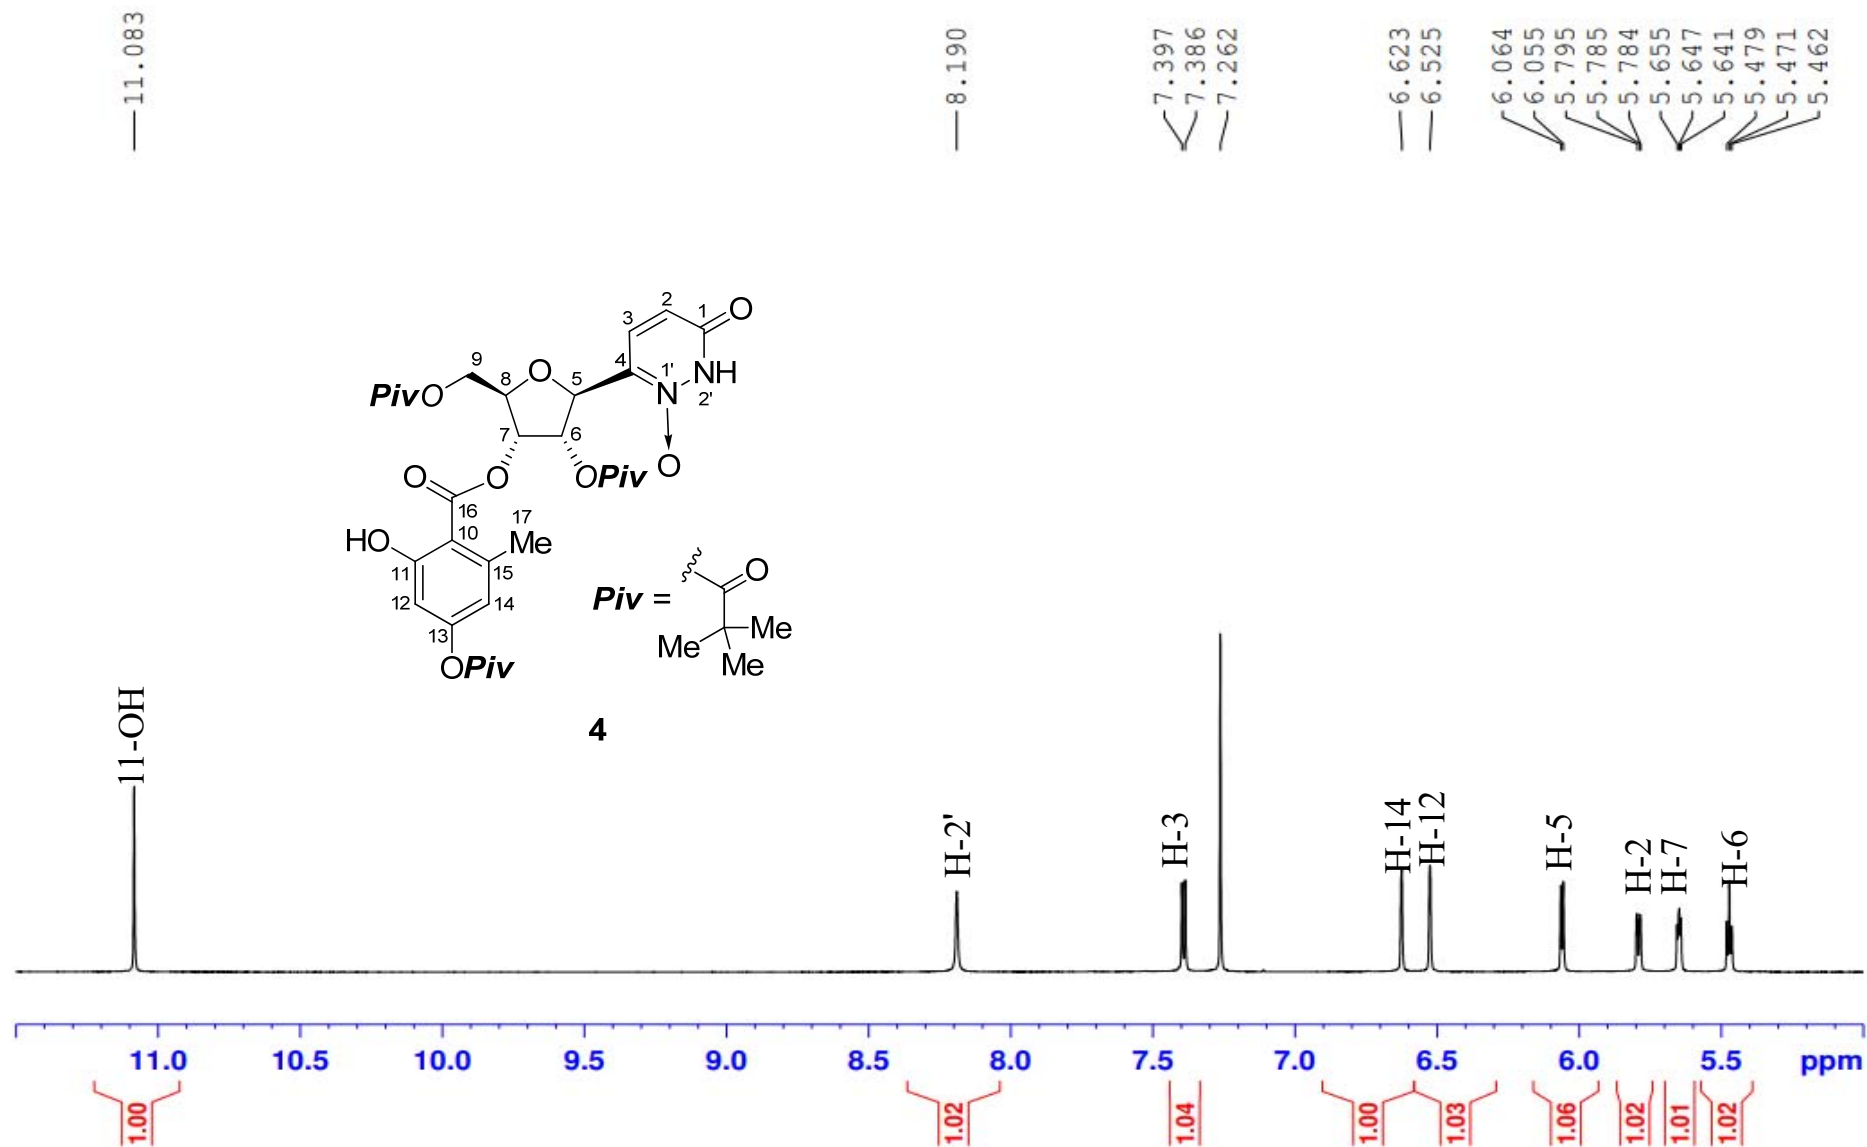



$^{13}\text{C}$  (175 MHz) NMR spectrum of **4** in  $\text{CDCl}_3$

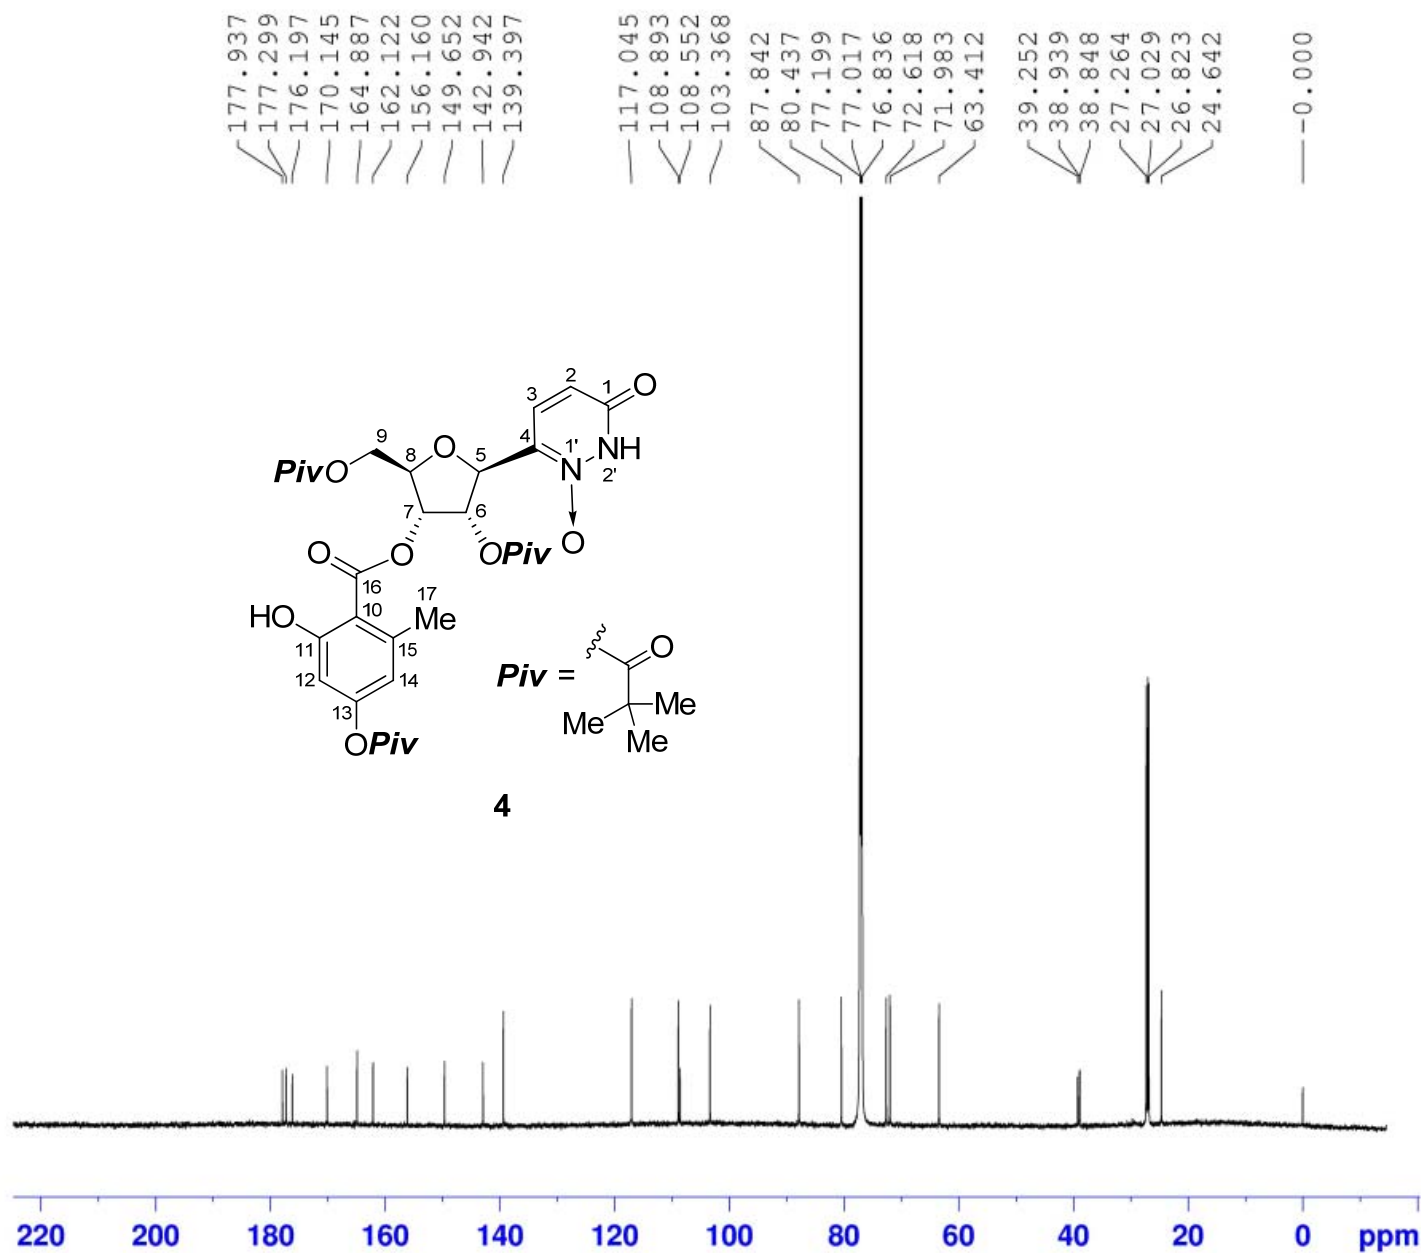

```

NAME      wubinbin-145D-R-6-1
EXPNO     11
PROCNO     1
Date_      20211027
Time       21.05 h
INSTRUM    spect
PROBHD     Z120187_0028 {
PULPROG    zgpg30
TD          32768
SOLVENT     CDCl3
NS          4000
DS          8
SWH         43859.648 Hz
FIDRES     2.676980 Hz
AQ          0.3736052 sec
RG          181.26
DW          11.400 usec
DE          18.00 usec
TE          298.0 K
D1          1.00000000 sec
D11         0.03000000 sec
TD0         1
SFO1       176.0797677 MHz
NUC1        13C
P0          3.97 usec
P1          11.90 usec
SI          32768
SF          176.0604019 MHz
WDW         EM
SSB         0
LB          3.00 Hz
GB          0
PC          1.40
    
```



$^{13}\text{C}$  (175 MHz) NMR spectrum of **4** in  $\text{CDCl}_3$

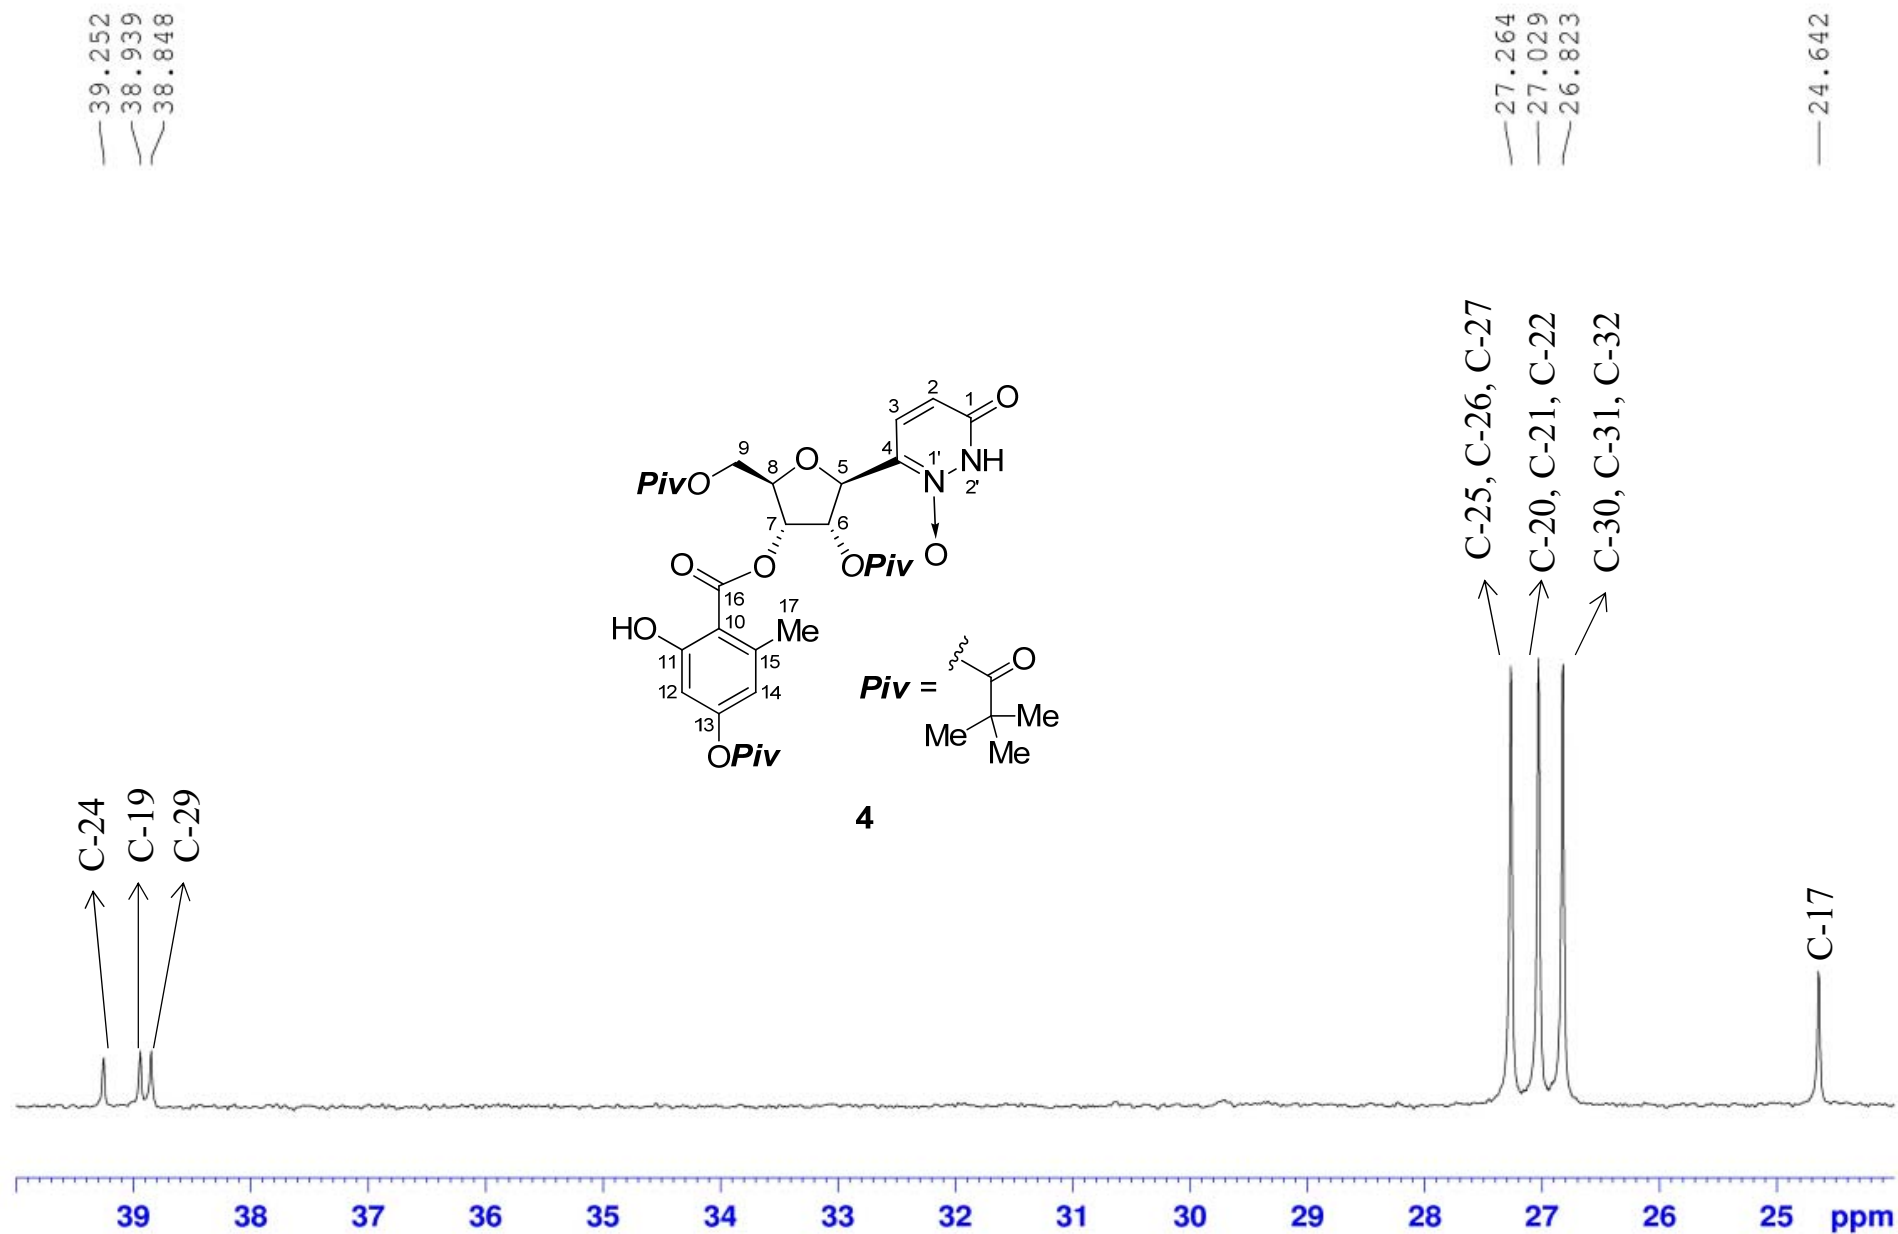

$^{13}\text{C}$  (175 MHz) NMR spectrum of **4** in  $\text{CDCl}_3$

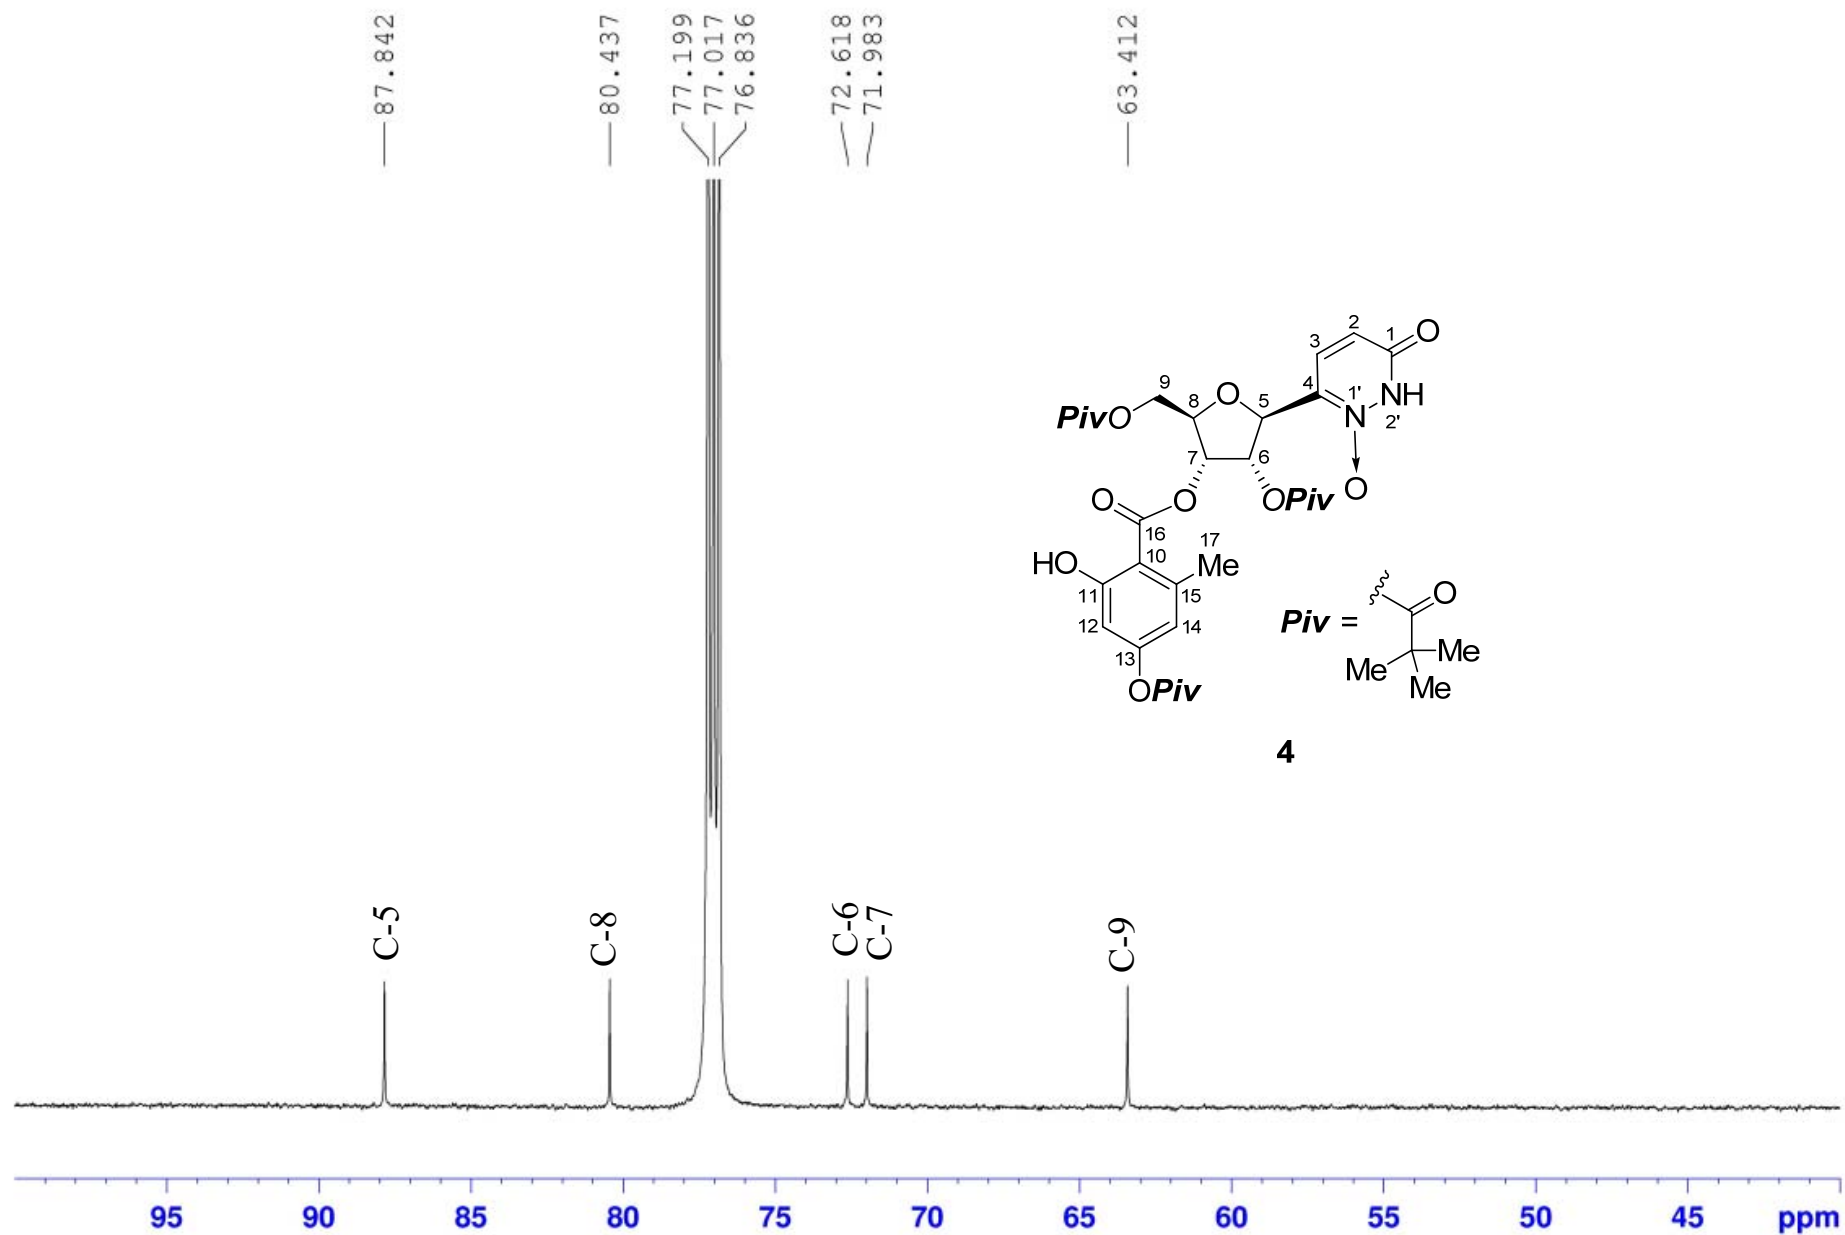

$^{13}\text{C}$  (175 MHz) NMR spectrum of **4** in  $\text{CDCl}_3$

—117.045

—108.893  
—108.552

—103.368

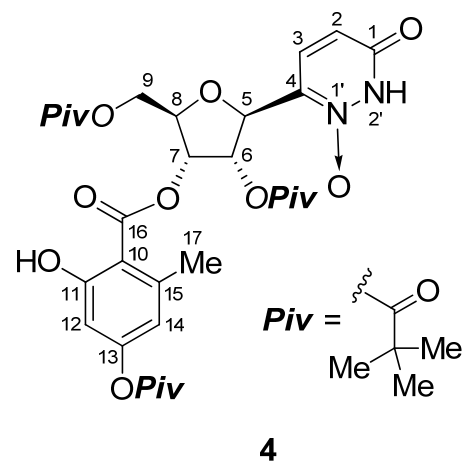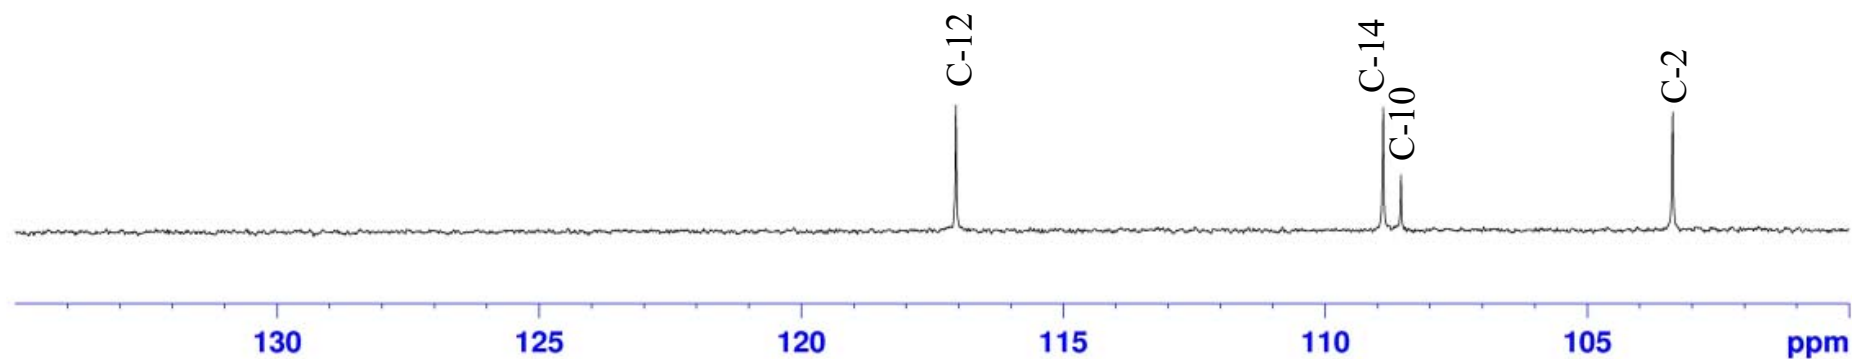

S84

$^{13}\text{C}$  (175 MHz) NMR spectrum of **4** in  $\text{CDCl}_3$

—177.937  
—177.299  
—176.197

—170.145

—164.887

—162.122

—156.160

—149.652

—142.942

—139.397

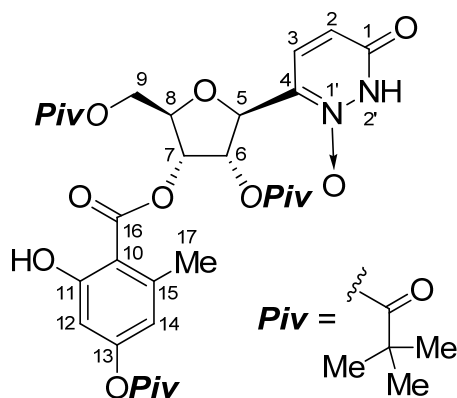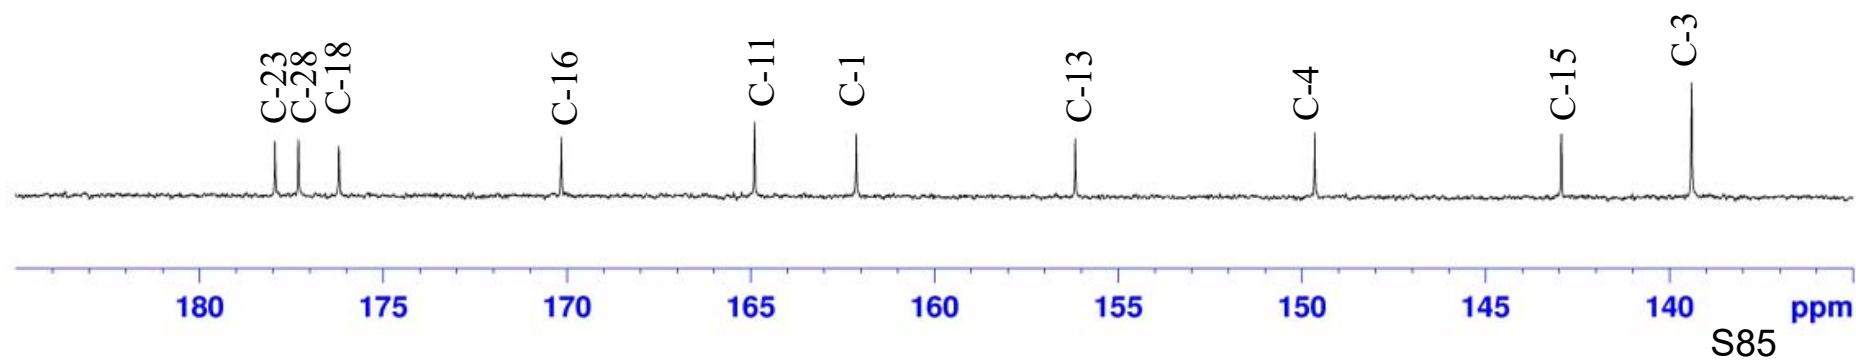

# DEPT135 (175 MHz) spectrum of **4** in CDCl<sub>3</sub>

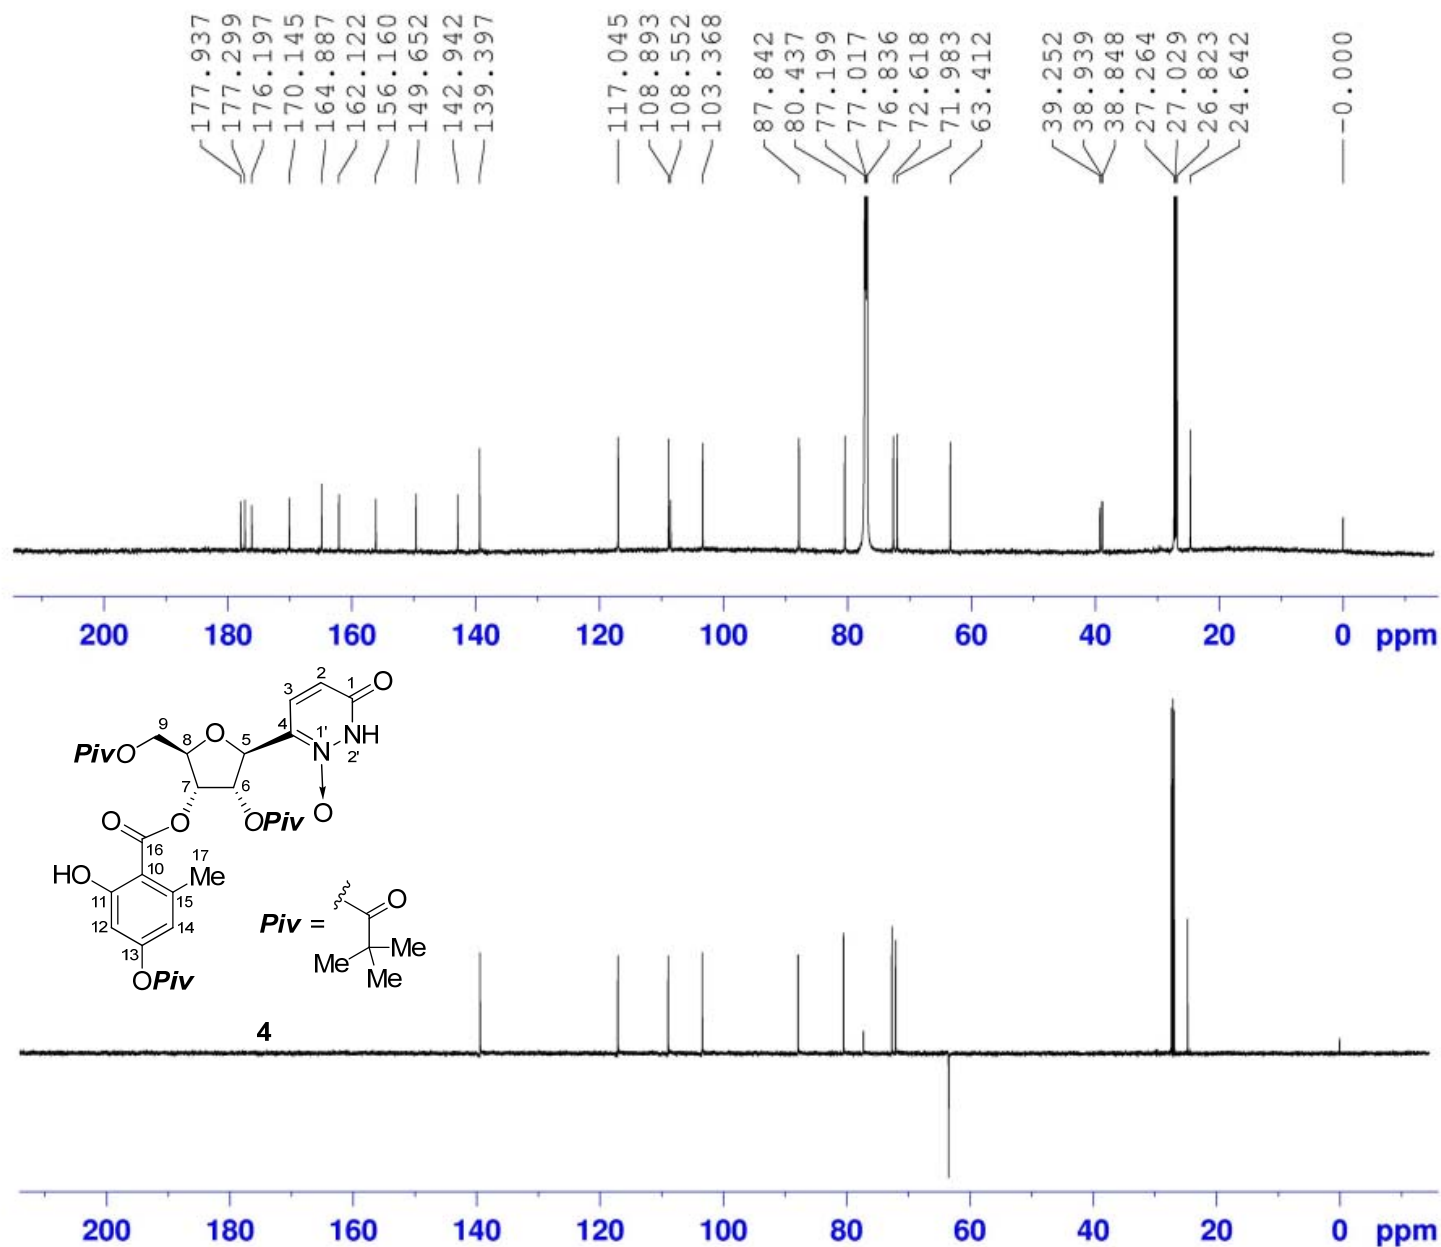

```

NAME      wubinbin-145D-R-6-1
EXPNO     12
PROCNO    1
Date_     20211027
Time      21.54 h
INSTRUM    spect
PROBHD     Z120187_0028 (
PULPROG    deptsp135
TD         32768
SOLVENT    CDCl3
NS         2000
DS         8
SWH        43859.648 Hz
FIDRES     2.676980 Hz
AQ         0.3736052 sec
RG         181.26
DW         11.400 usec
DE         18.00 usec
TE         298.0 K
CNST2     145.0000000
D1         1.00000000 sec
D2         0.00344828 sec
D12        0.00002000 sec
TD0        1
SFO1      176.0797677 MHz
NUC1       13C
P1         11.90 usec
P13        2000.00 usec
SI         32768
SF         176.0604010 MHz
WDW        EM
SSB        0
LB         1.00 Hz
GB         0
PC         1.40
    
```

DEPT135 (175 MHz) spectrum of **4** in CDCl<sub>3</sub>

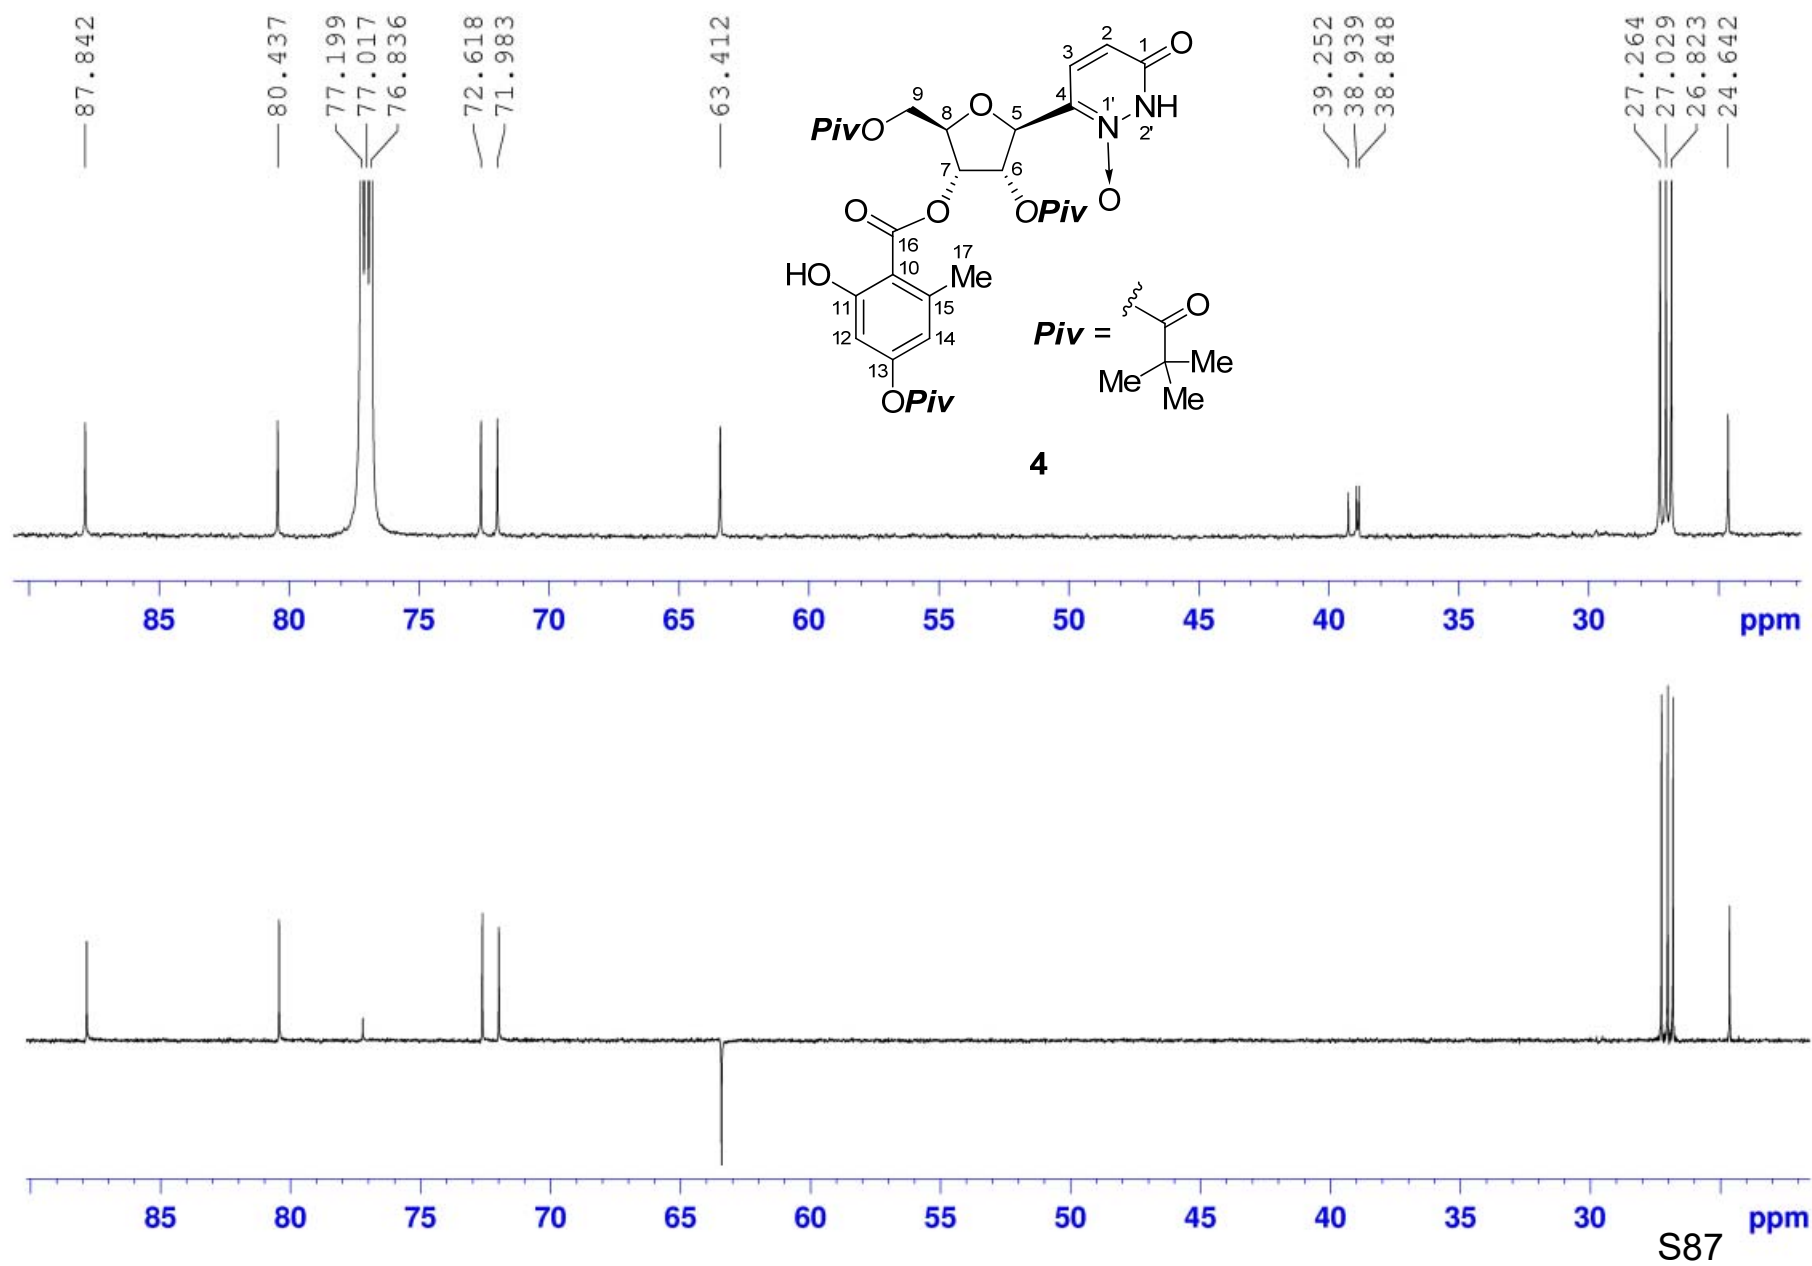

DEPT135 (175 MHz) spectrum of **4** in CDCl<sub>3</sub>

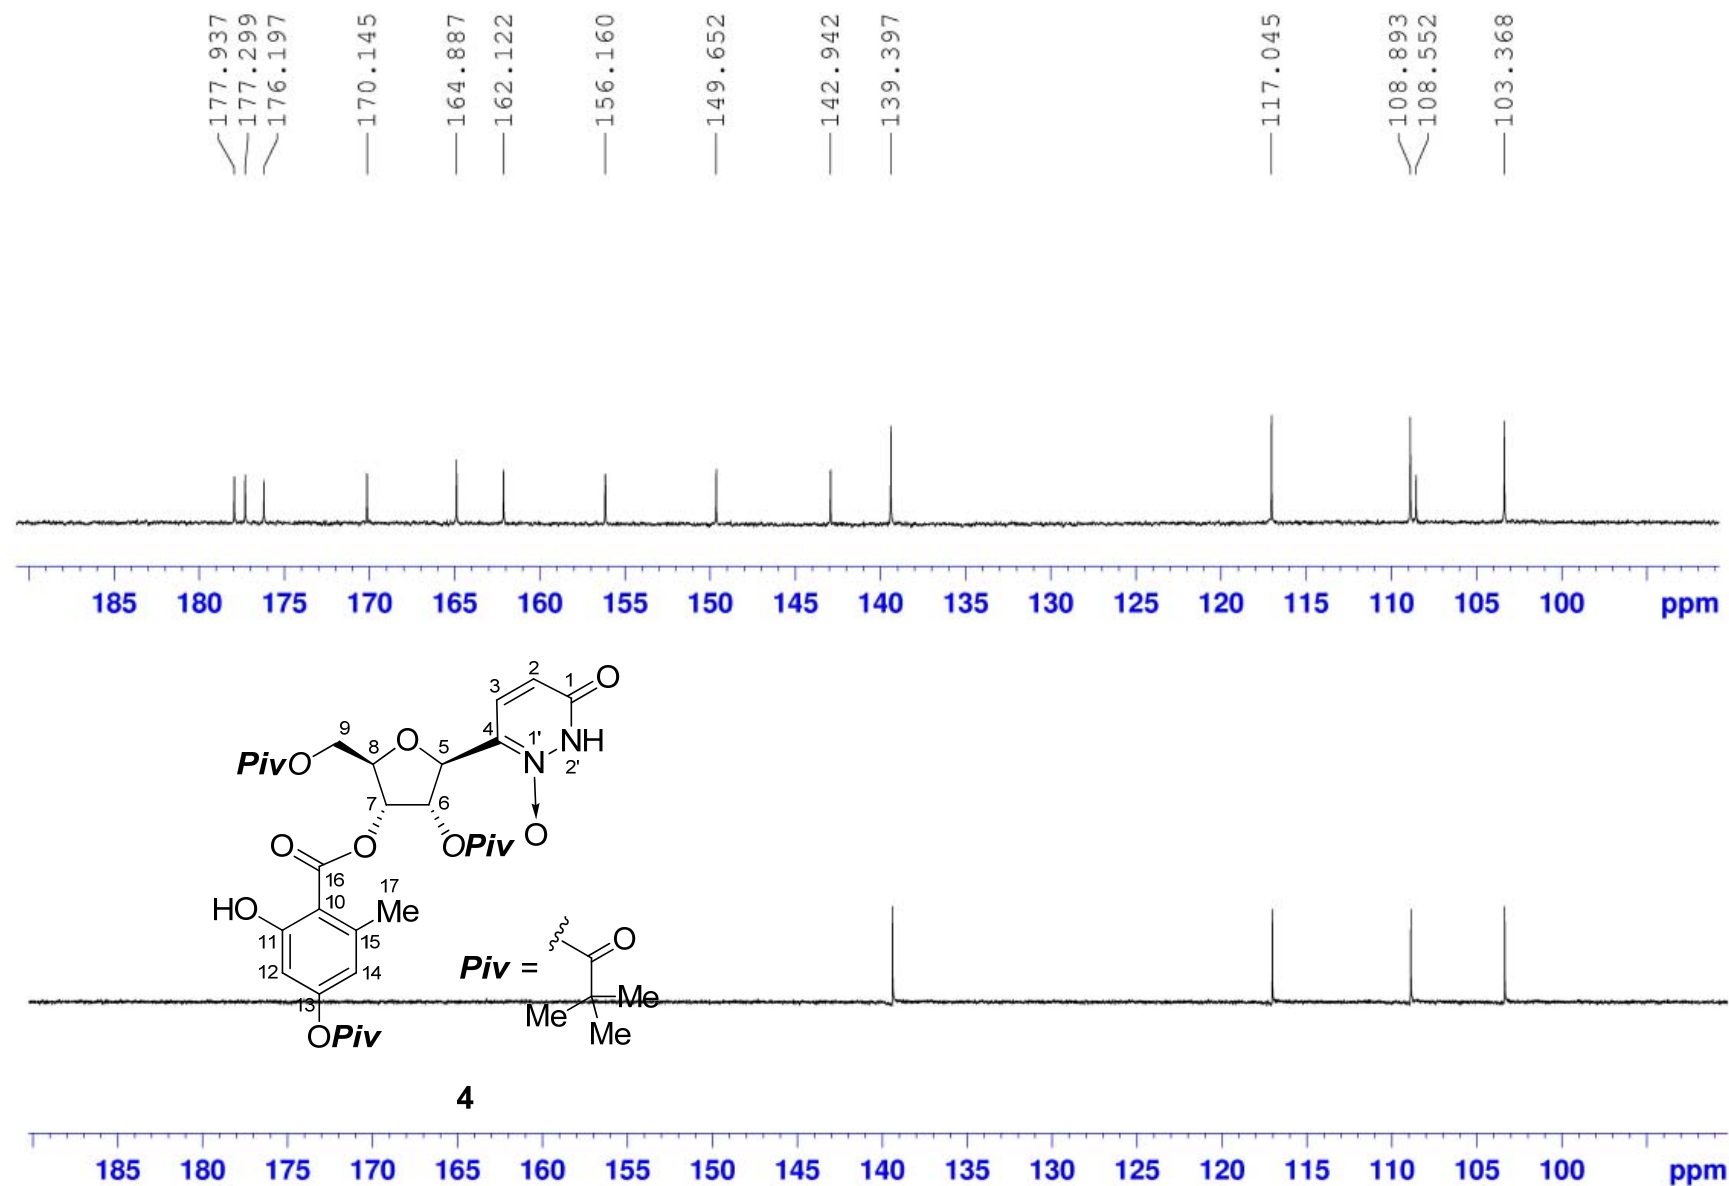

$^1\text{H}$ - $^1\text{H}$  COSY (700 MHz) spectrum of **4** in  $\text{CDCl}_3$

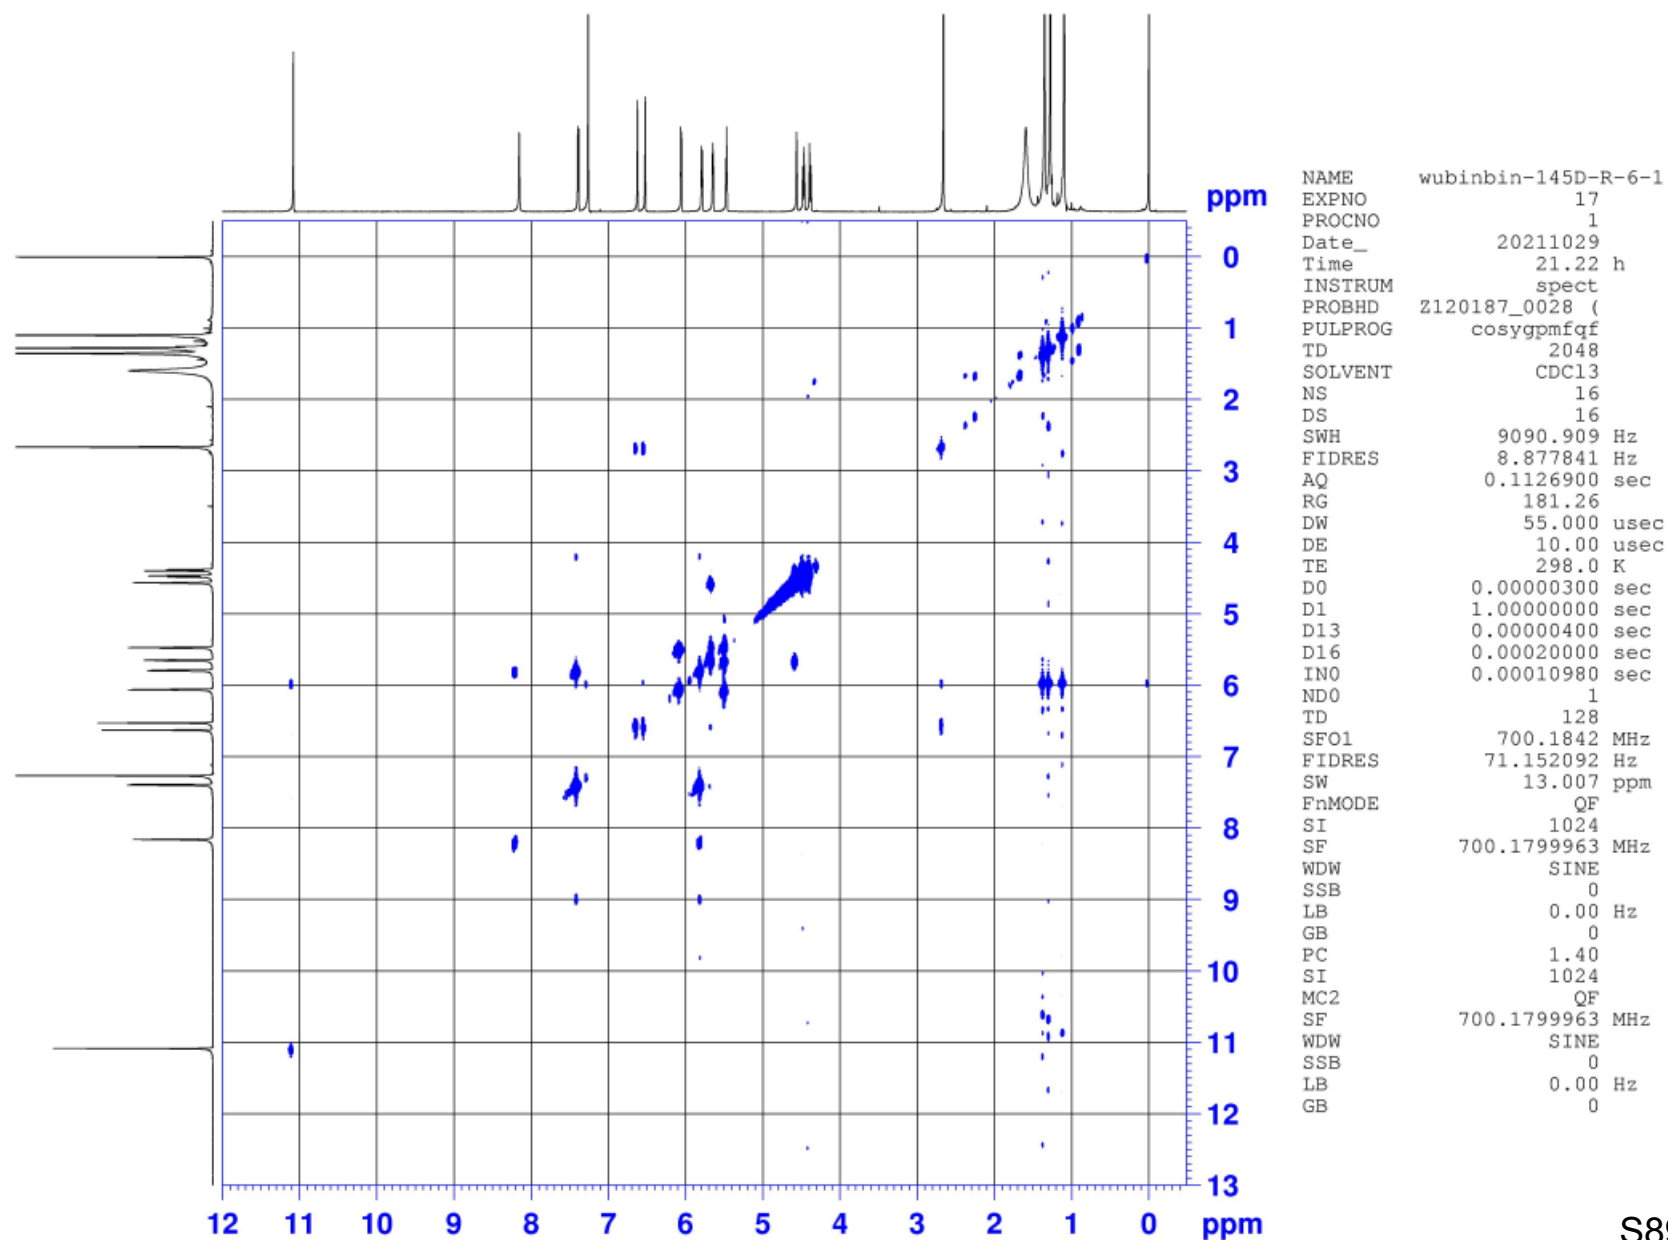



$^1\text{H}$ - $^1\text{H}$  COSY (700 MHz) spectrum of **4** in  $\text{CDCl}_3$

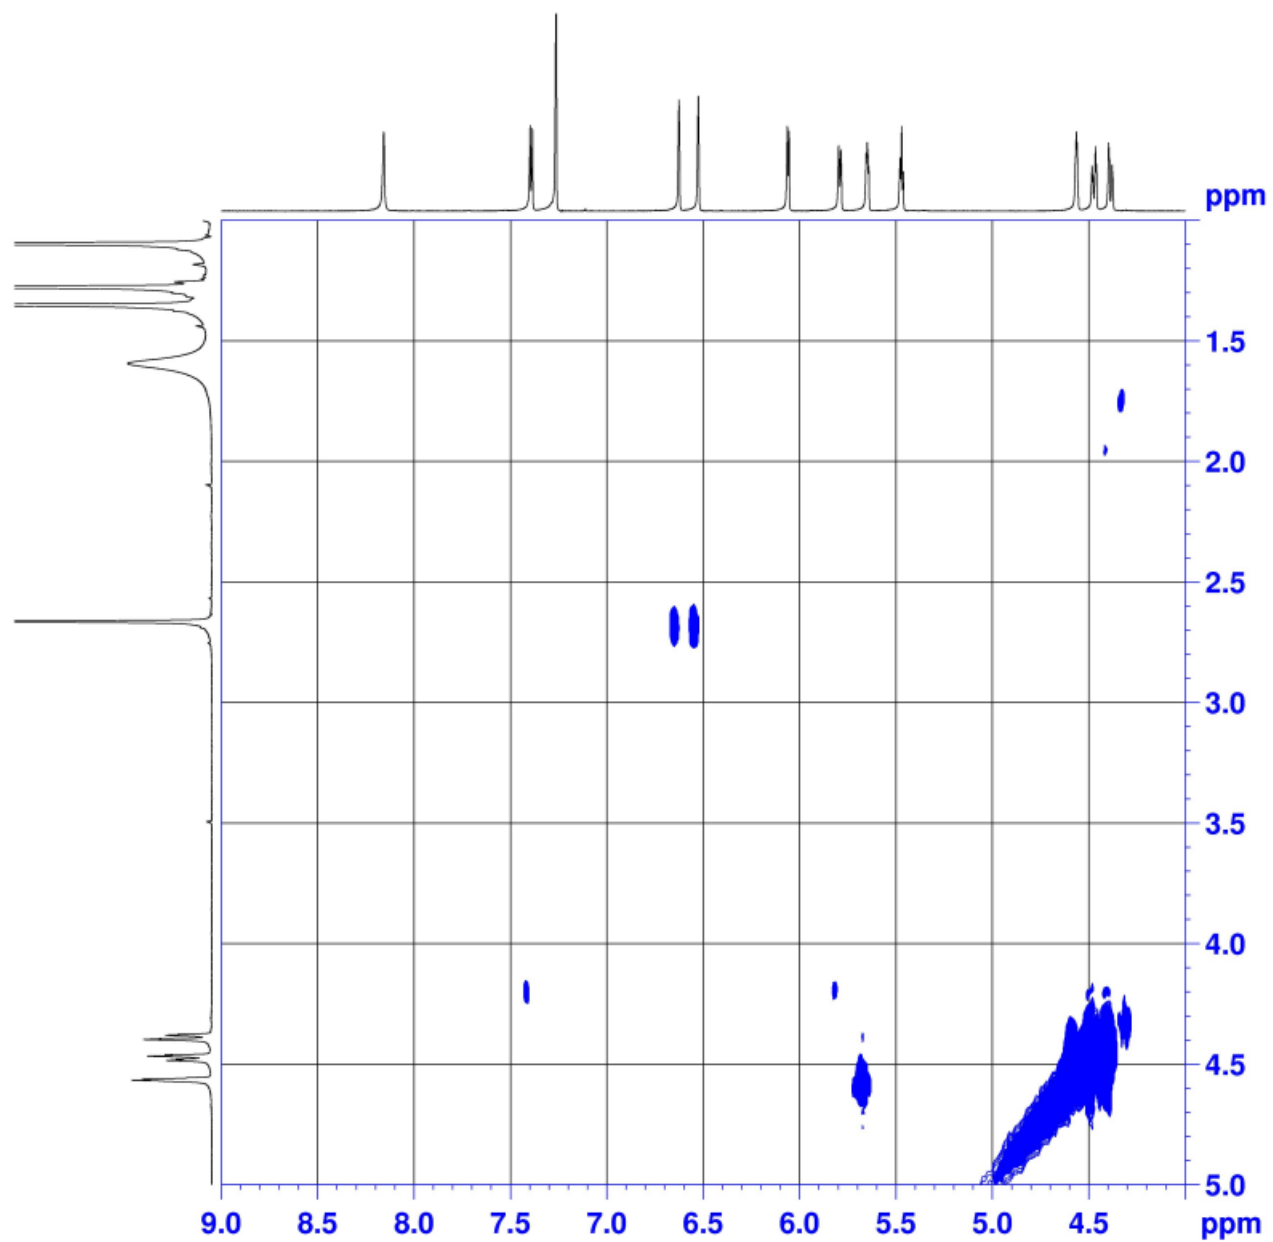

$^1\text{H}$ - $^1\text{H}$  COSY (700 MHz) spectrum of **4** in  $\text{CDCl}_3$

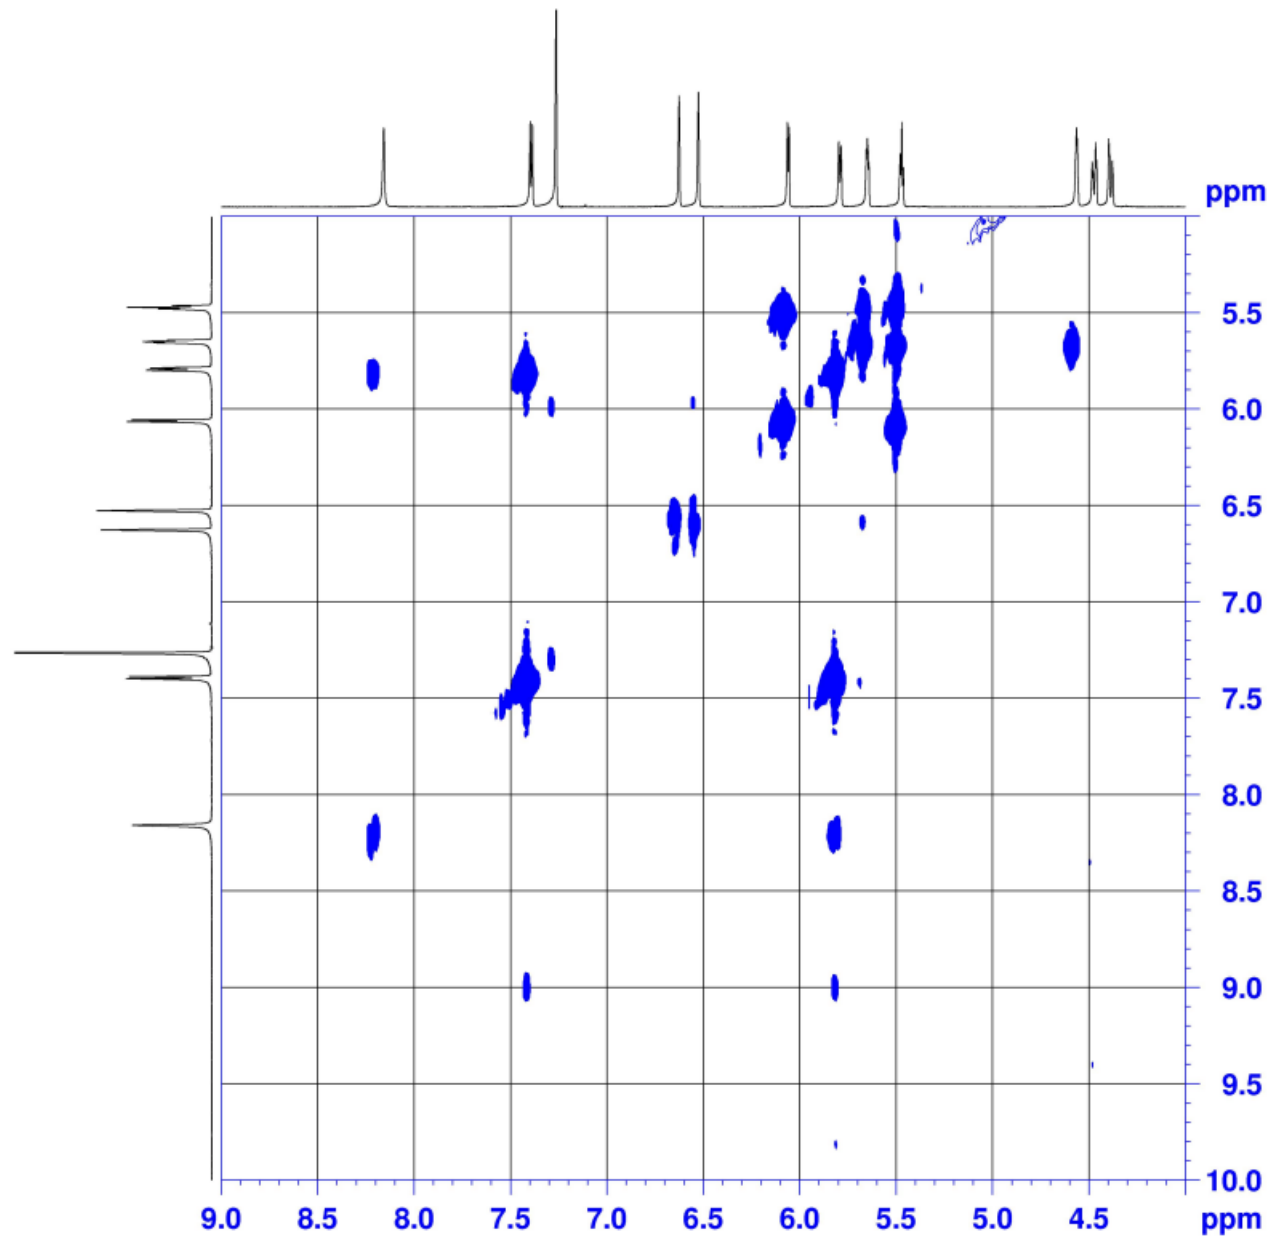

# HSQC (700 MHz) spectrum of **4** in CDCl<sub>3</sub>

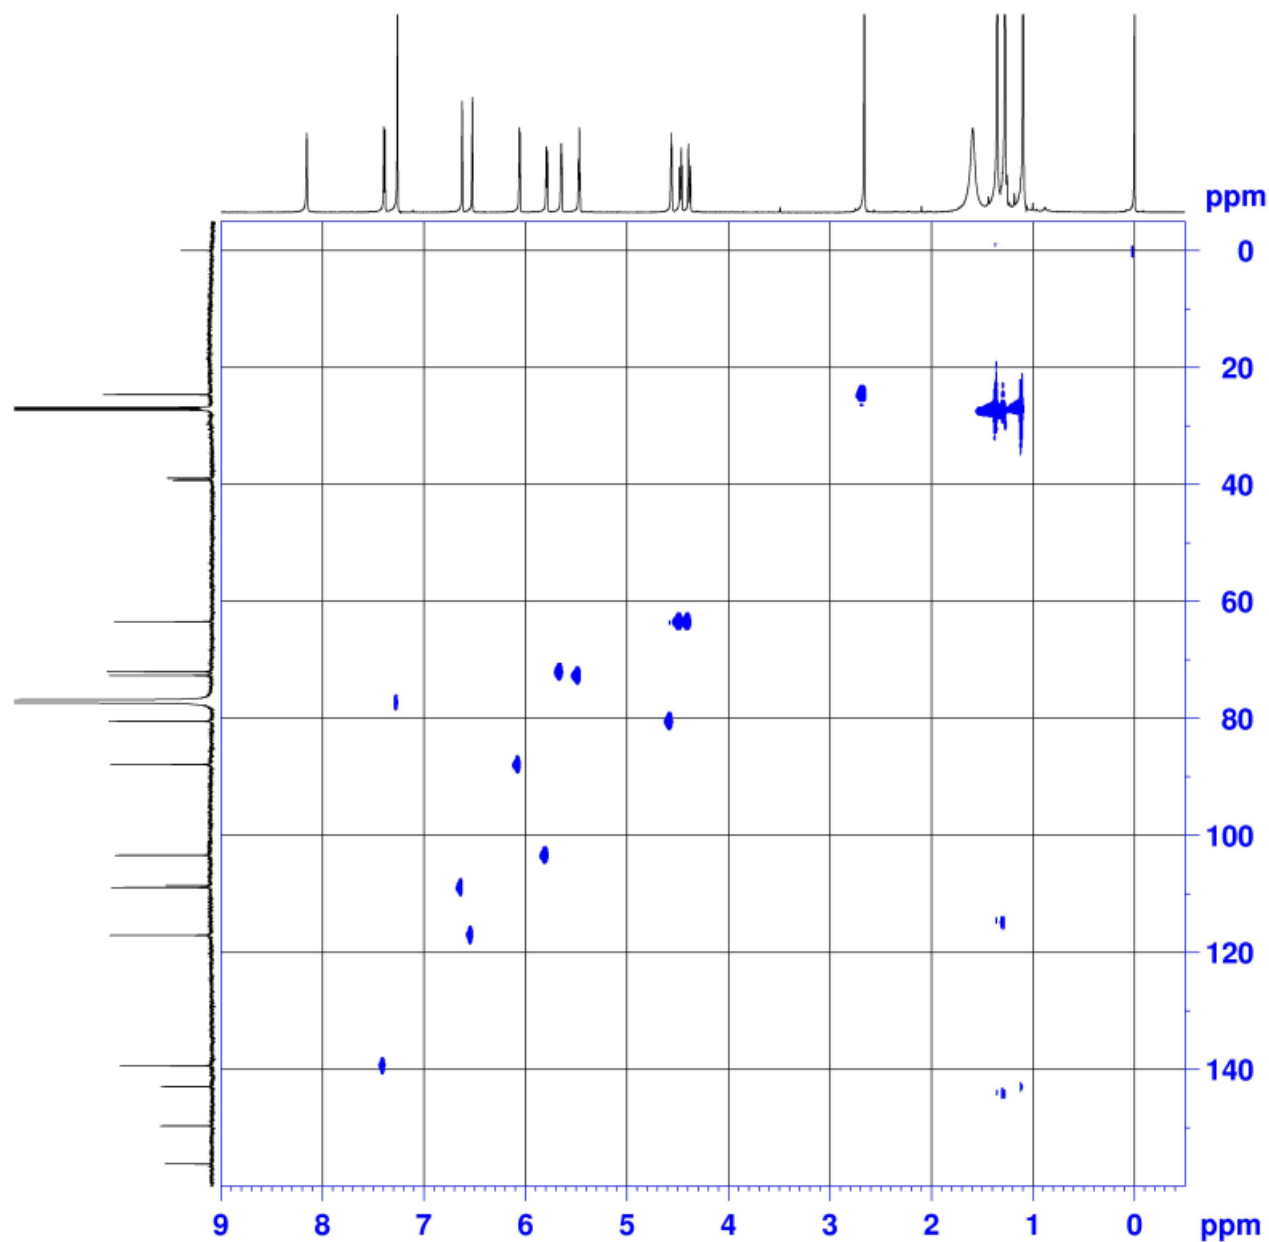

```

NAME      wubinbin-145D-R-6-1
EXPNO     16
PROCNO    1
Date_     20211029
Time      20.42 h
INSTRUM   spect
PROBHD    z120187_0028 (
PULPROG   hsqcetgp
TD         2048
SOLVENT   CDC13
NS         16
DS         16
SWH        9090.909 Hz
FIDRES     8.877841 Hz
AQ         0.1126900 sec
RG         181.26
DW         55.000 usec
DE         10.00 usec
TE         298.0 K
CNST2     145.0000000
D0         0.00000300 sec
D1         1.00000000 sec
D4         0.00172414 sec
D11        0.03000000 sec
D16        0.00020000 sec
IN0        0.00001390 sec
ND0        2
TD         128
SFO1       176.0768 MHz
FIDRES     281.025177 Hz
SW         204.293 ppm
FnMODE     Echo-Antiecho
SI         2048
SF         700.1800042 MHz
WDW        QSINE
SSB        2
LB         0.00 Hz
GB         0
PC         1.40
SI         2048
MC2        echo-antiecho
SF         176.0604010 MHz
WDW        QSINE
SSB        2
LB         0.00 Hz
GB         0
    
```

HSQC (700 MHz) spectrum of **4** in  $\text{CDCl}_3$

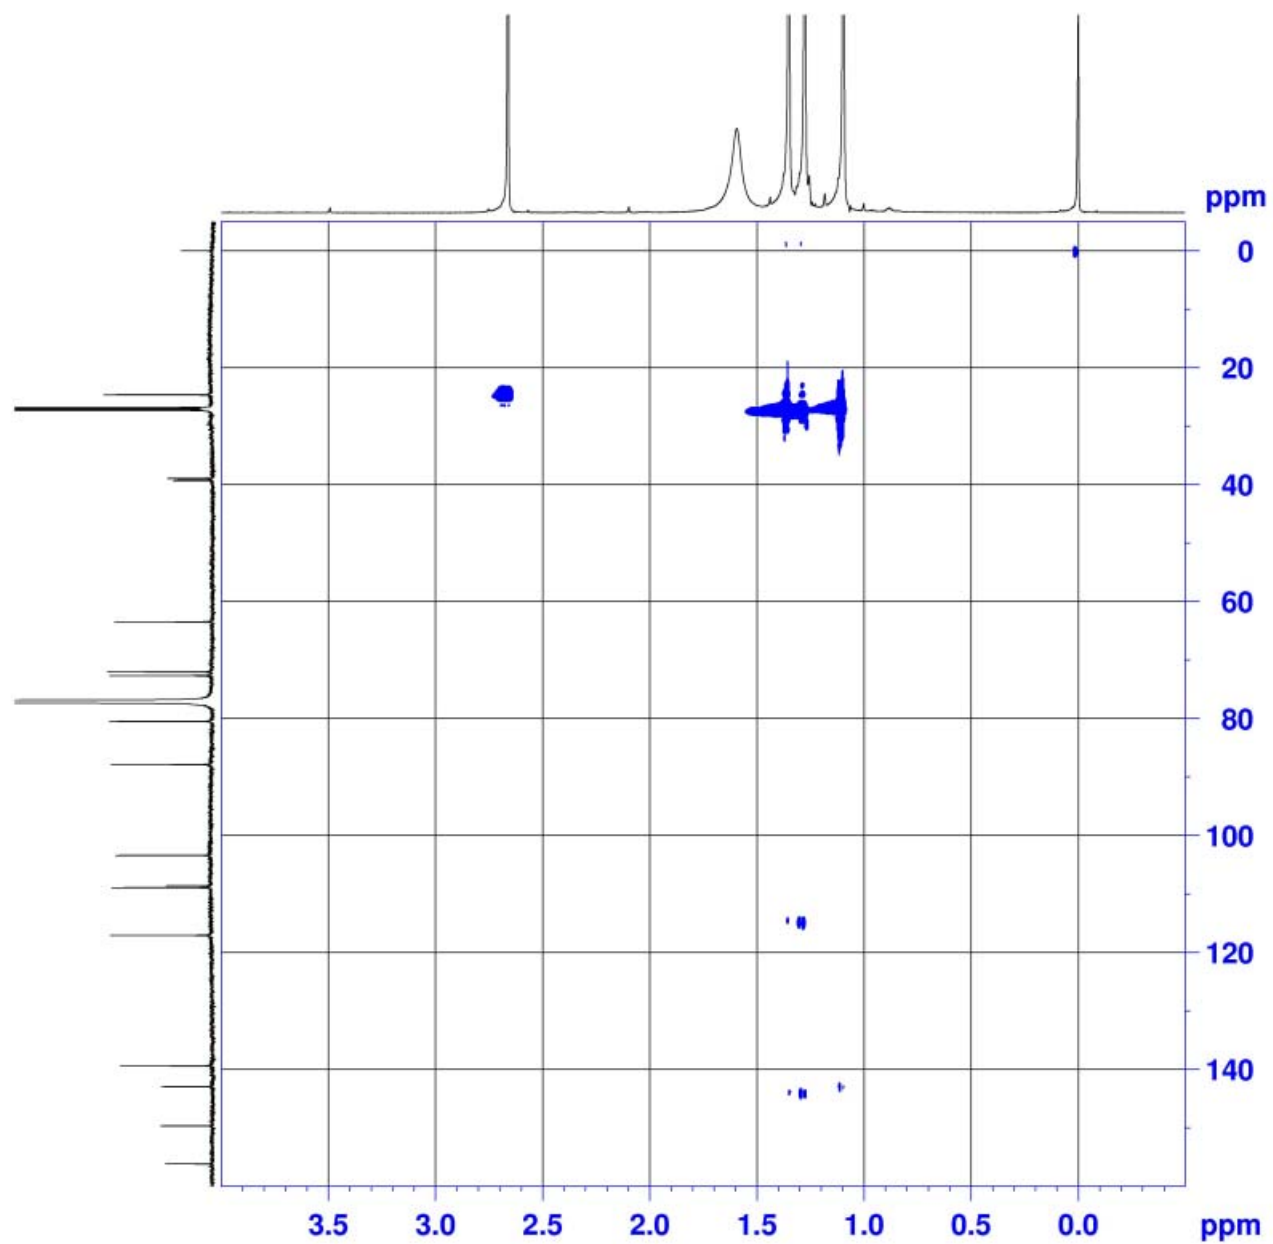

HSQC (700 MHz) spectrum of **4** in CDCl<sub>3</sub>

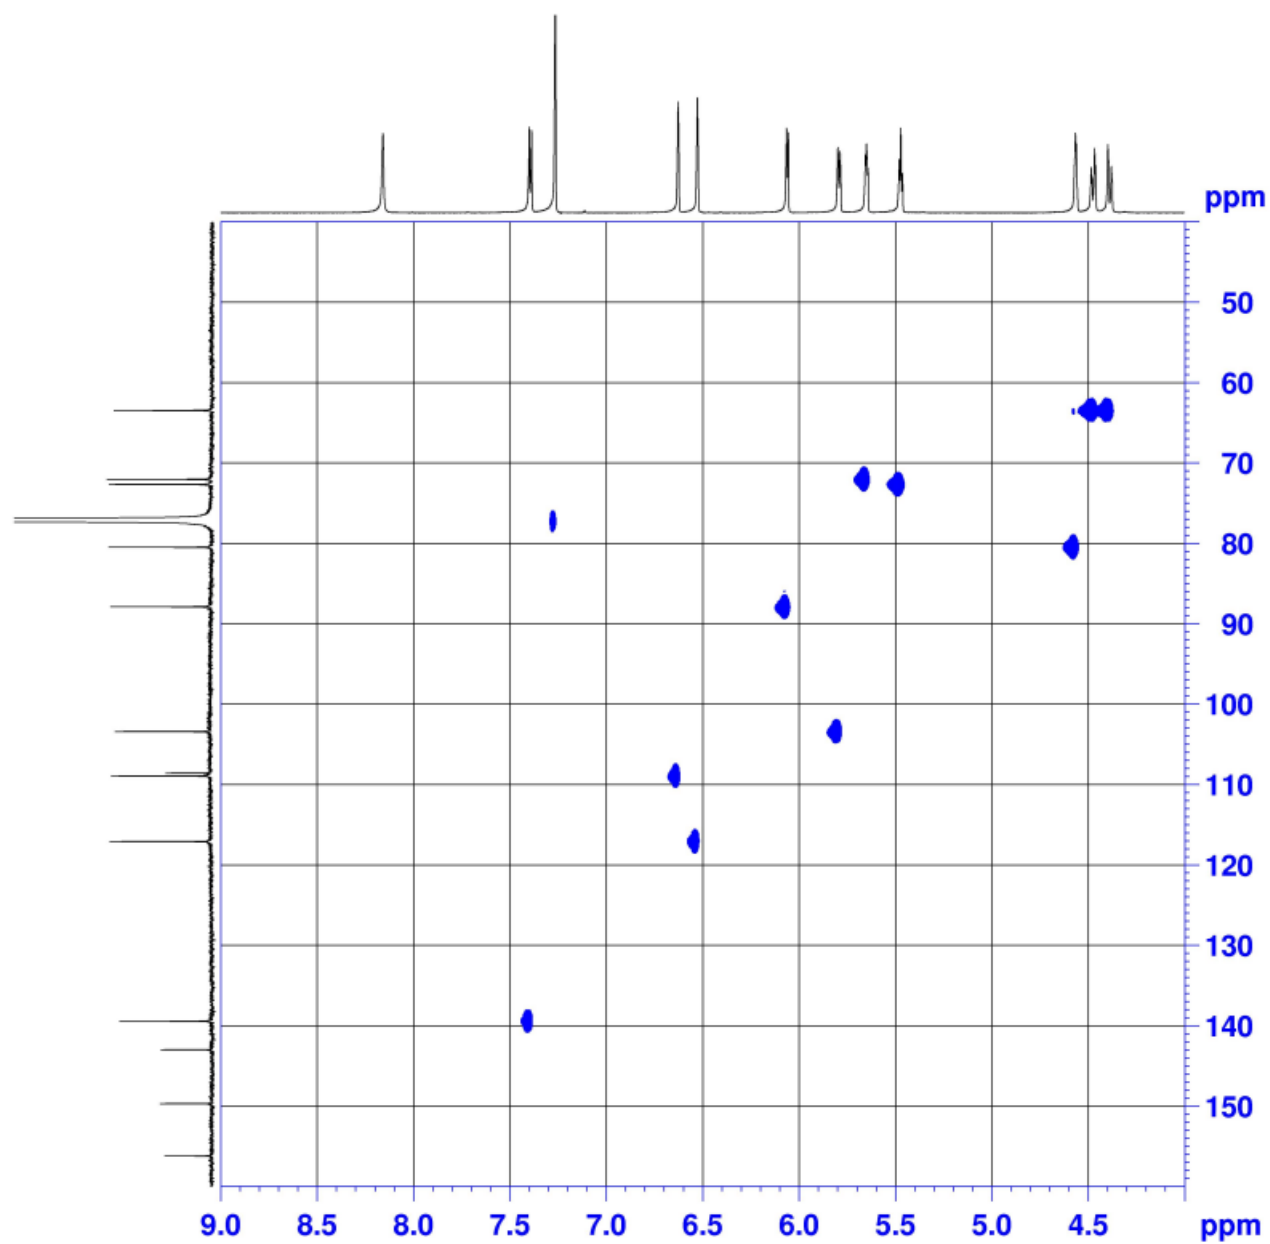

# HMBC (700 MHz) spectrum of **4** in CDCl<sub>3</sub>

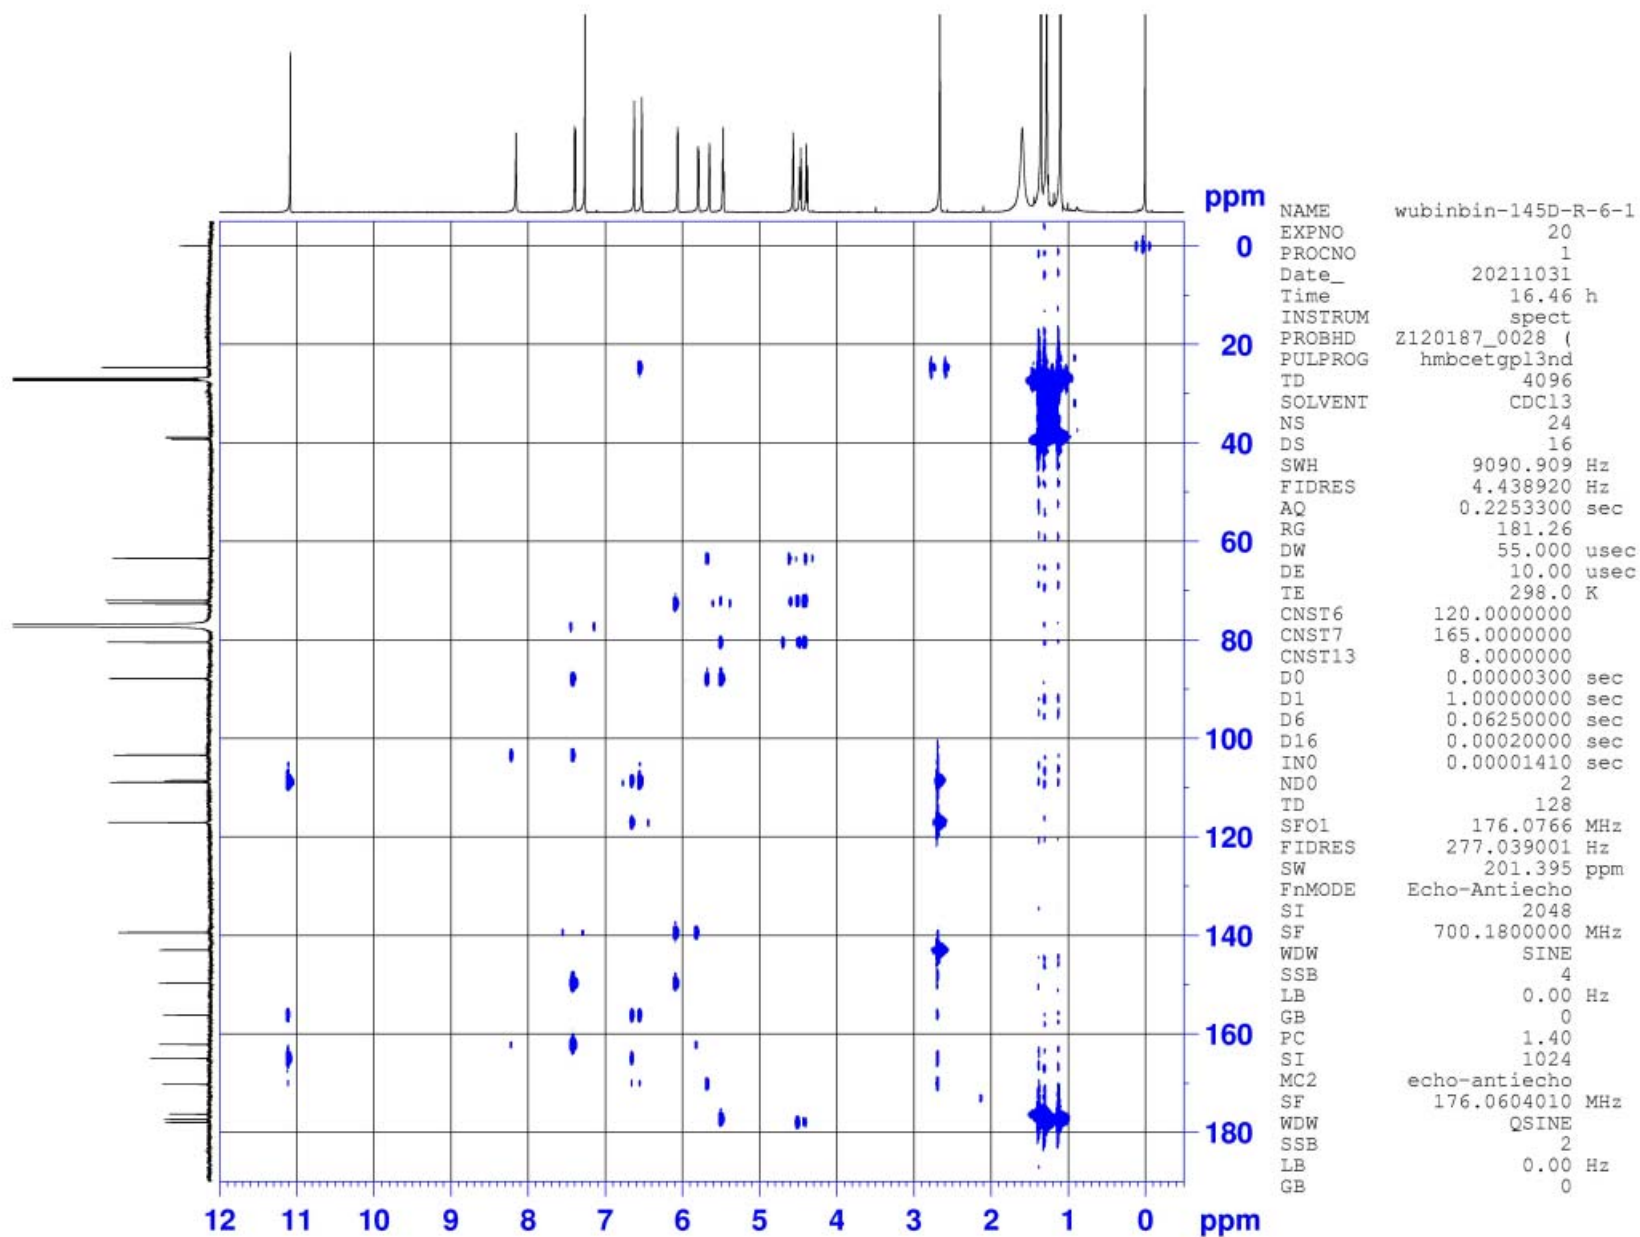

HMBC (700 MHz) spectrum of **4** in CDCl<sub>3</sub>

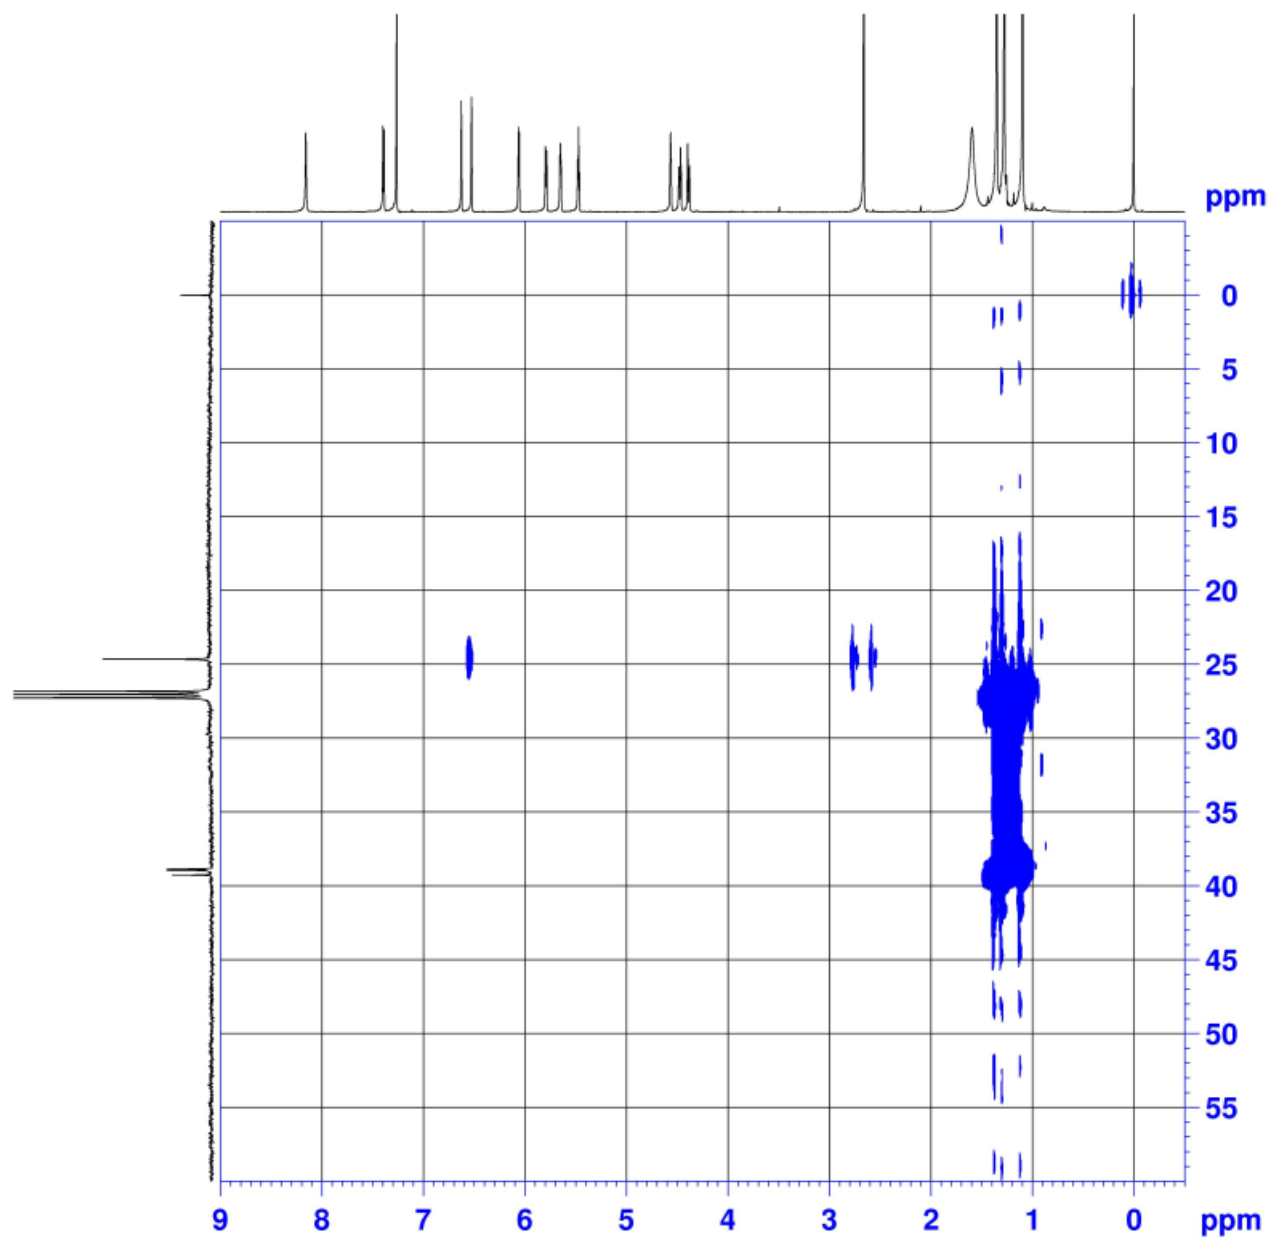

HMBC (700 MHz) spectrum of **4** in  $\text{CDCl}_3$

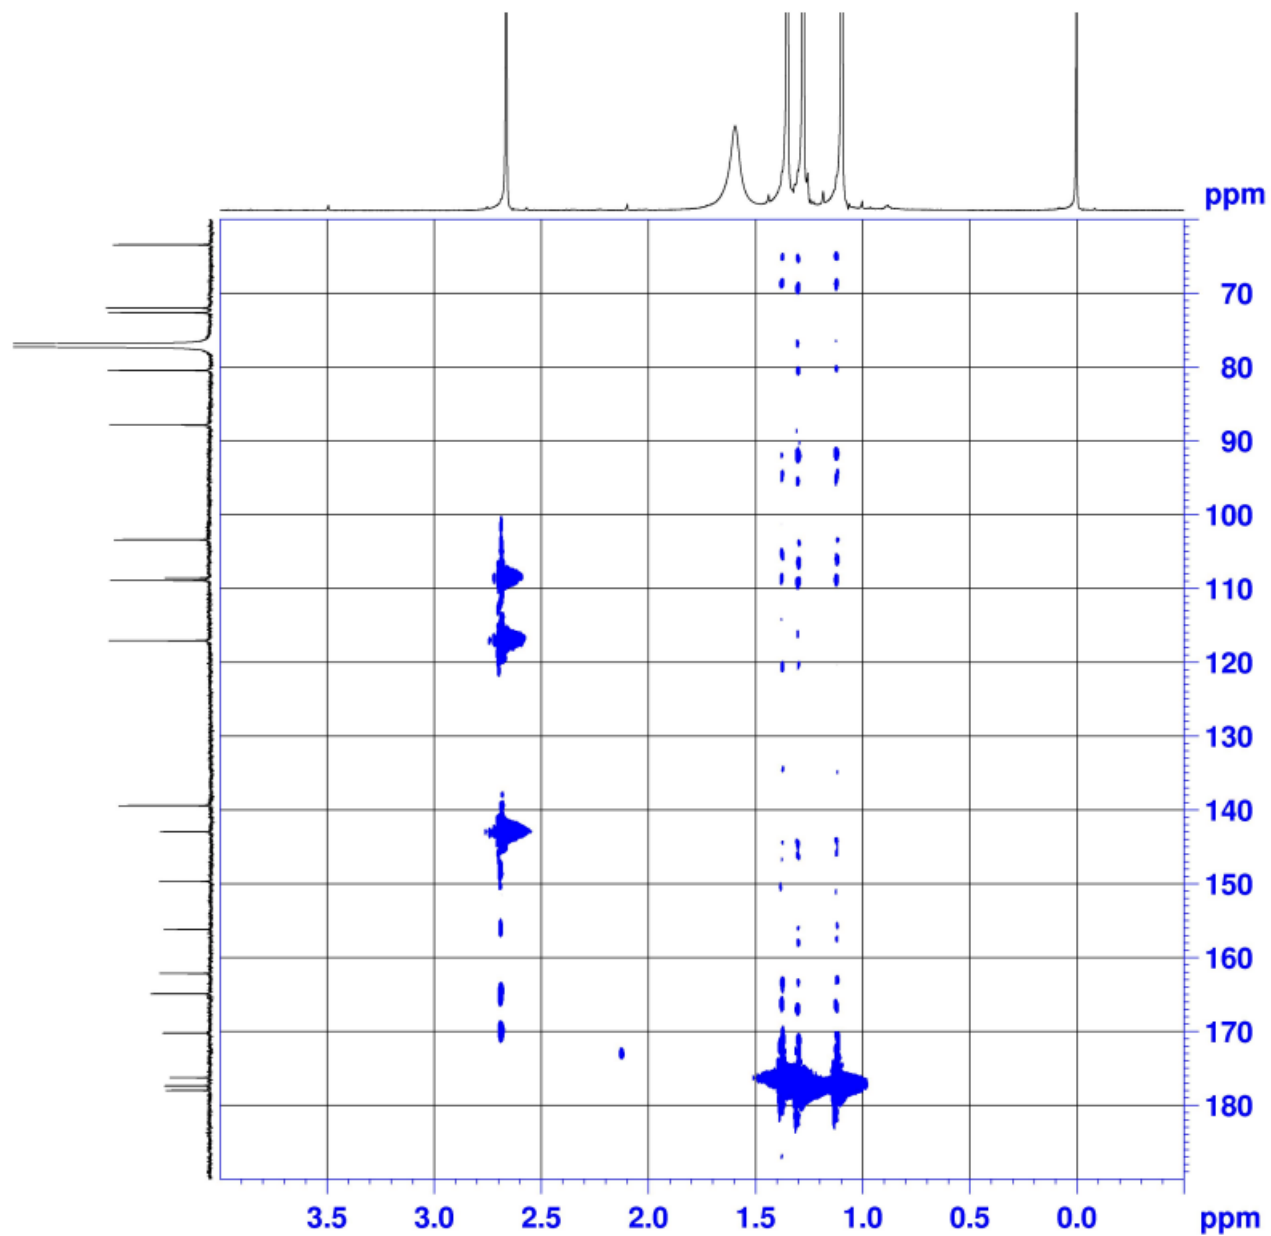



HMBC (700 MHz) spectrum of **4** in  $\text{CDCl}_3$

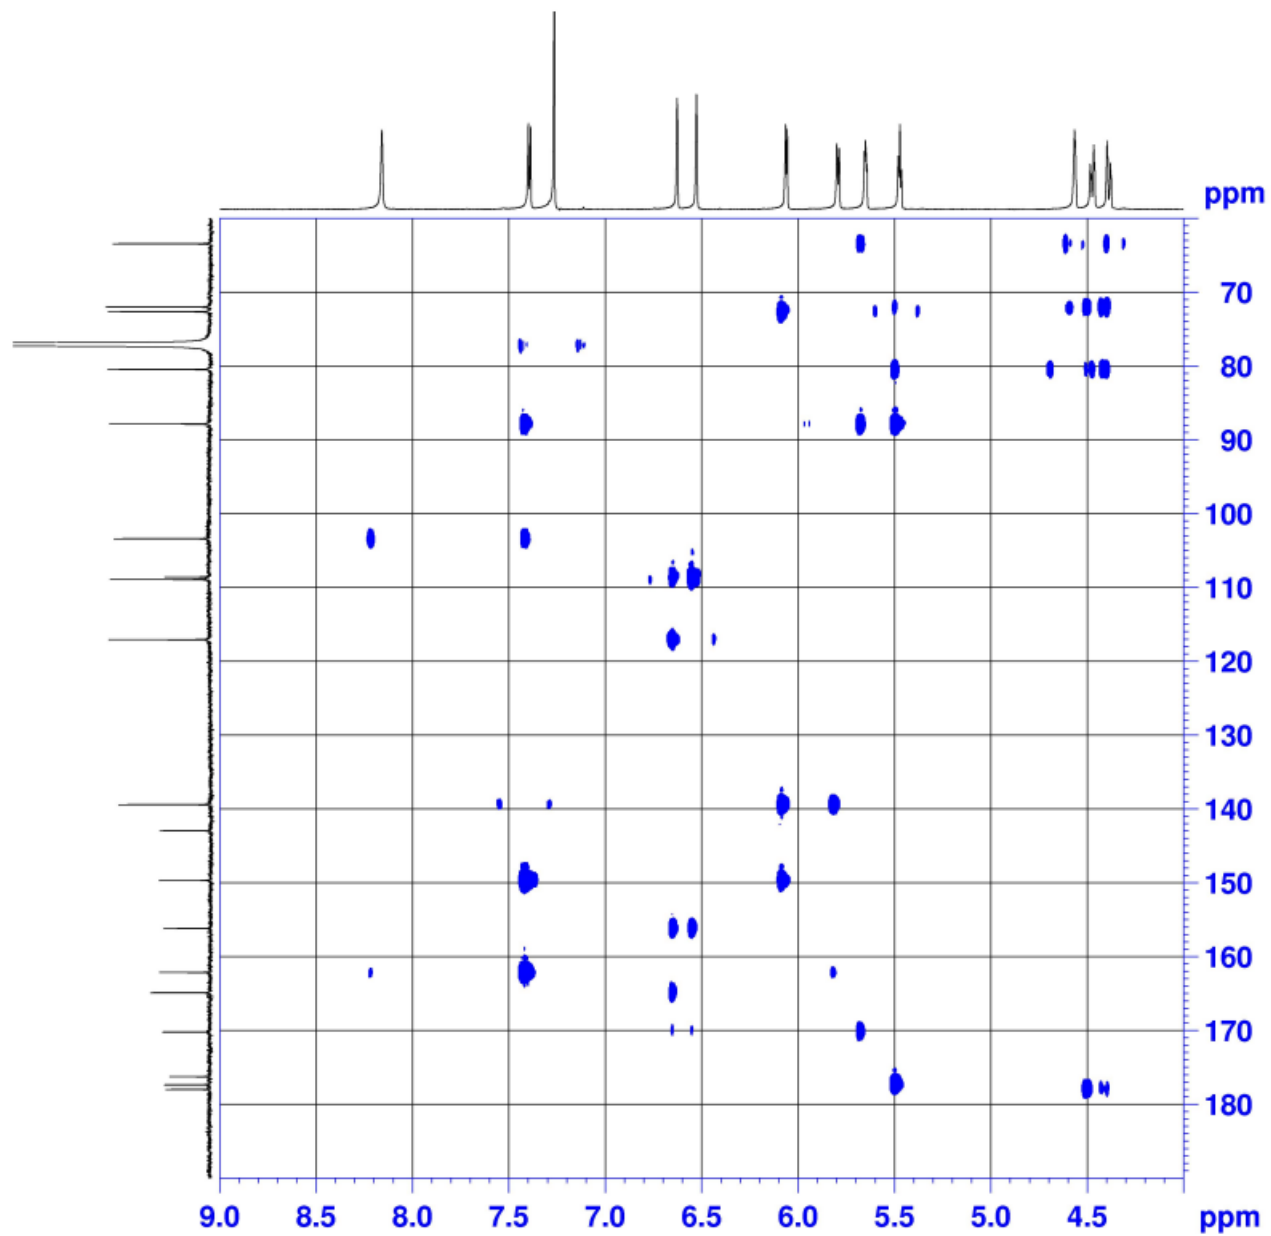

HMBC (700 MHz) spectrum of **4** in CDCl<sub>3</sub>

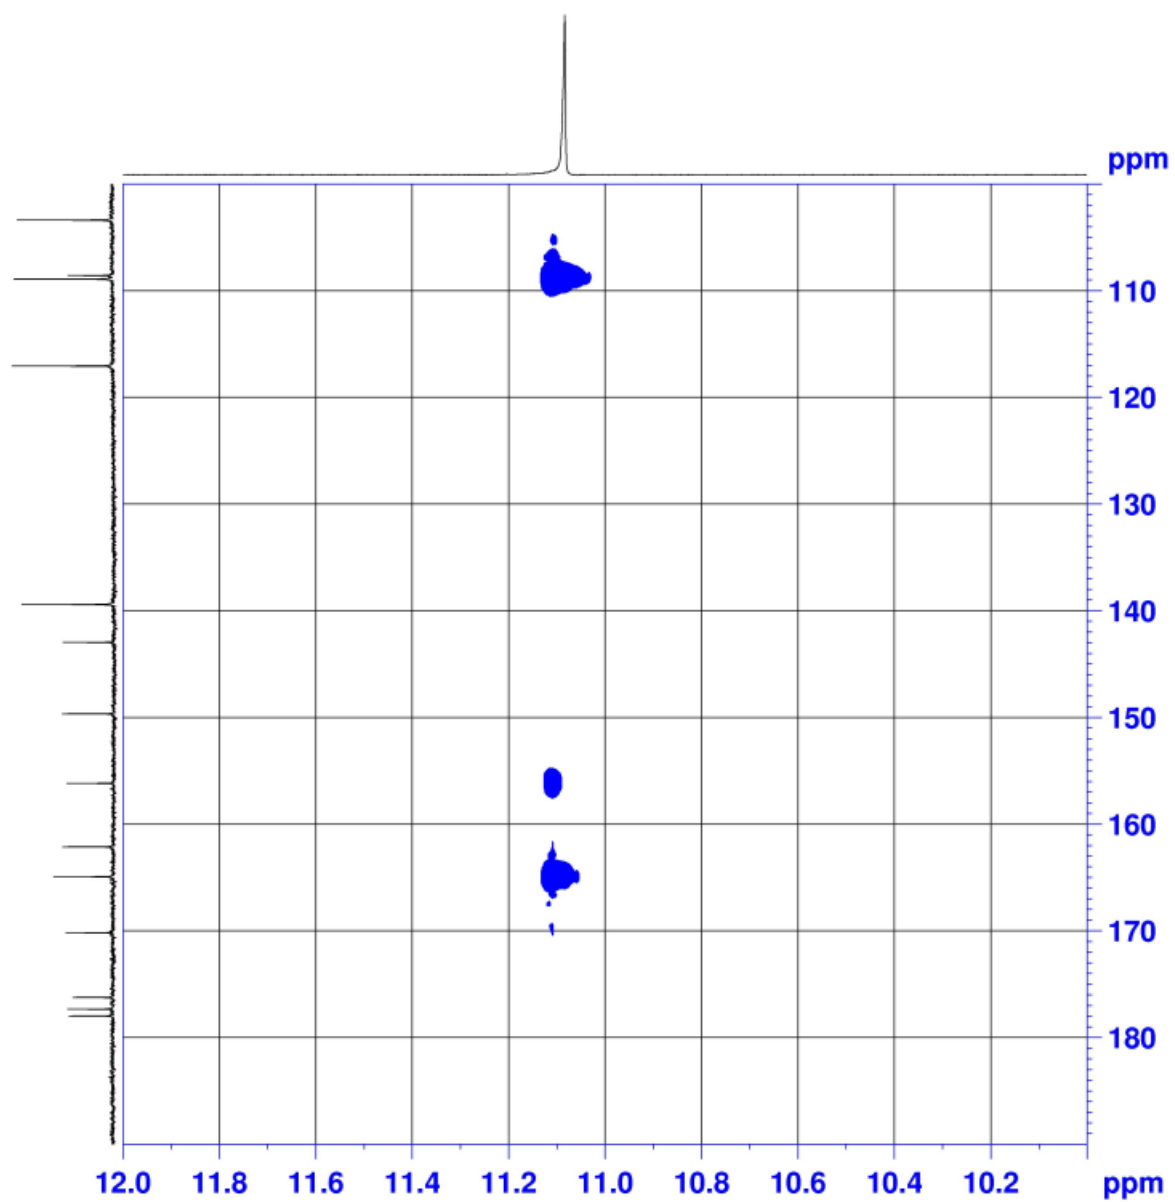

# NOESY (700 MHz) spectrum of **4** in CDCl<sub>3</sub>

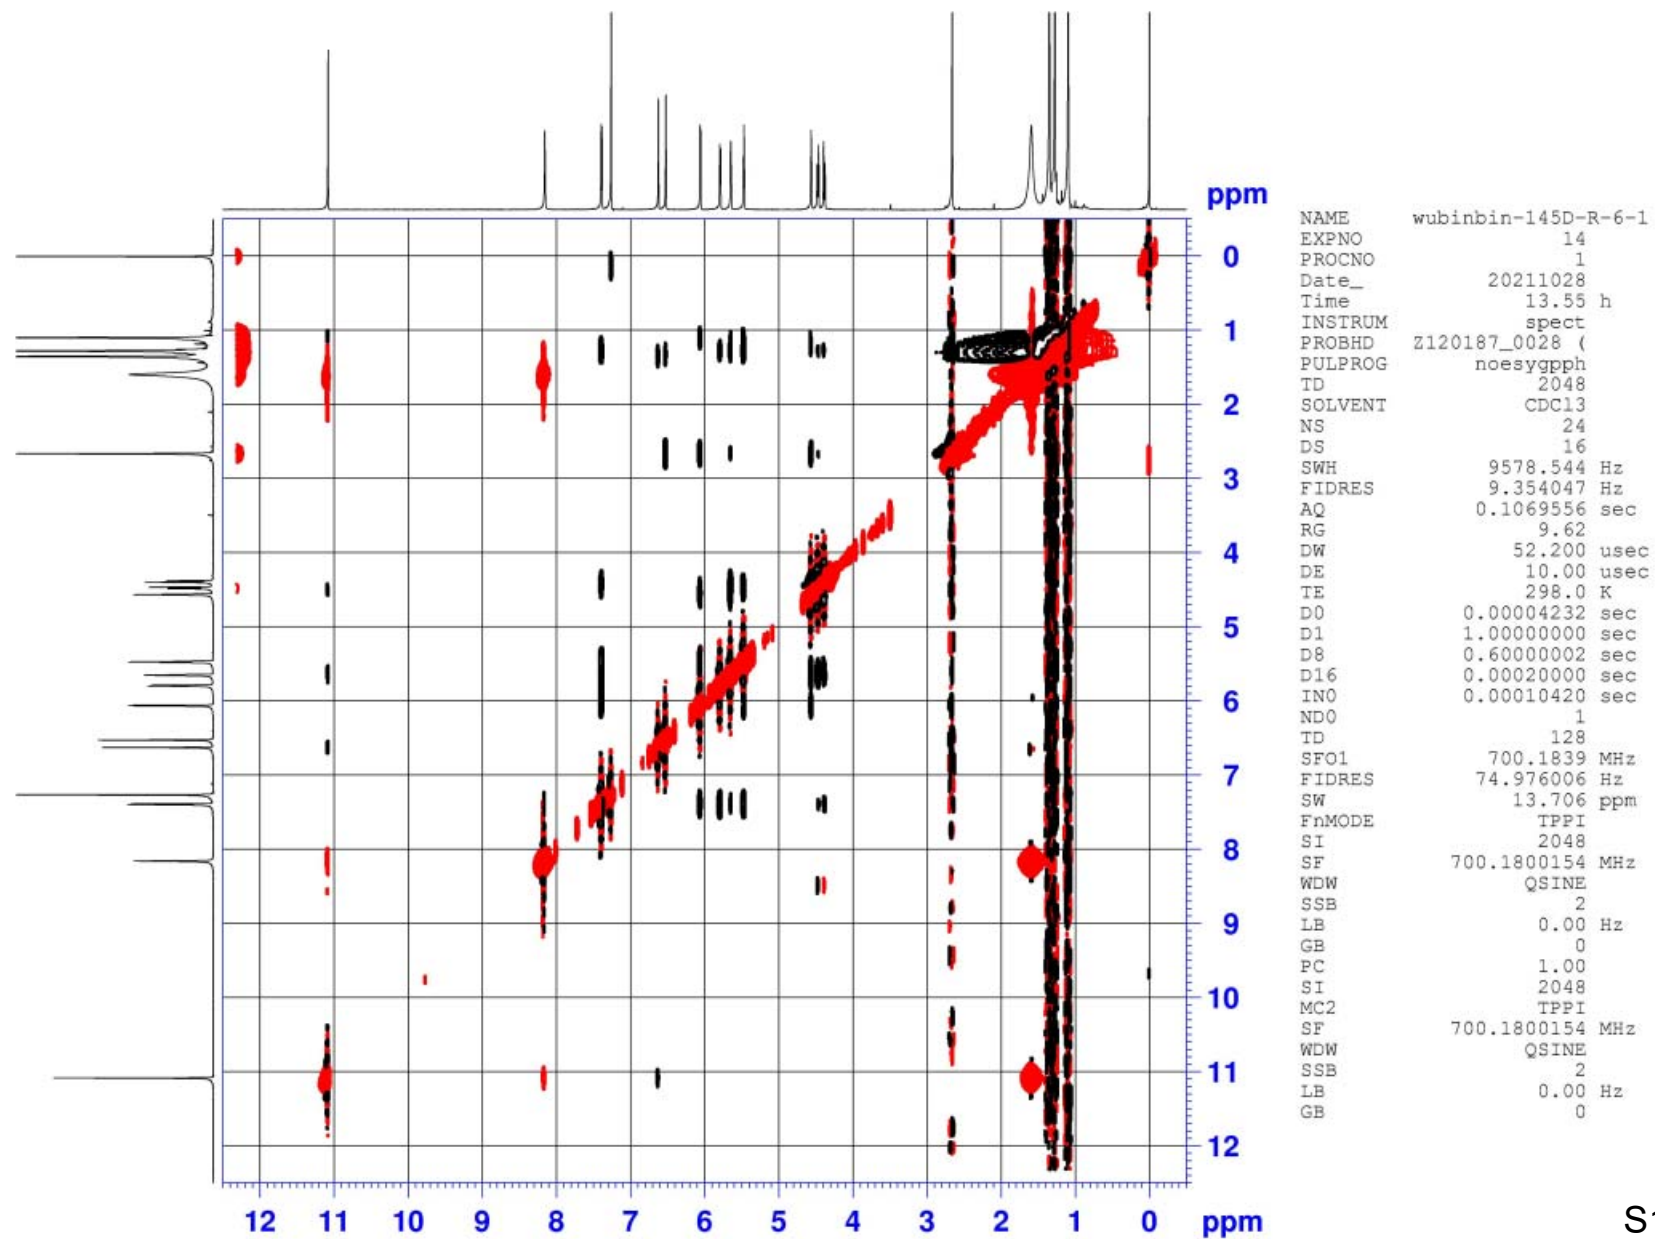

NOESY (700 MHz) spectrum of **4** in CDCl<sub>3</sub>

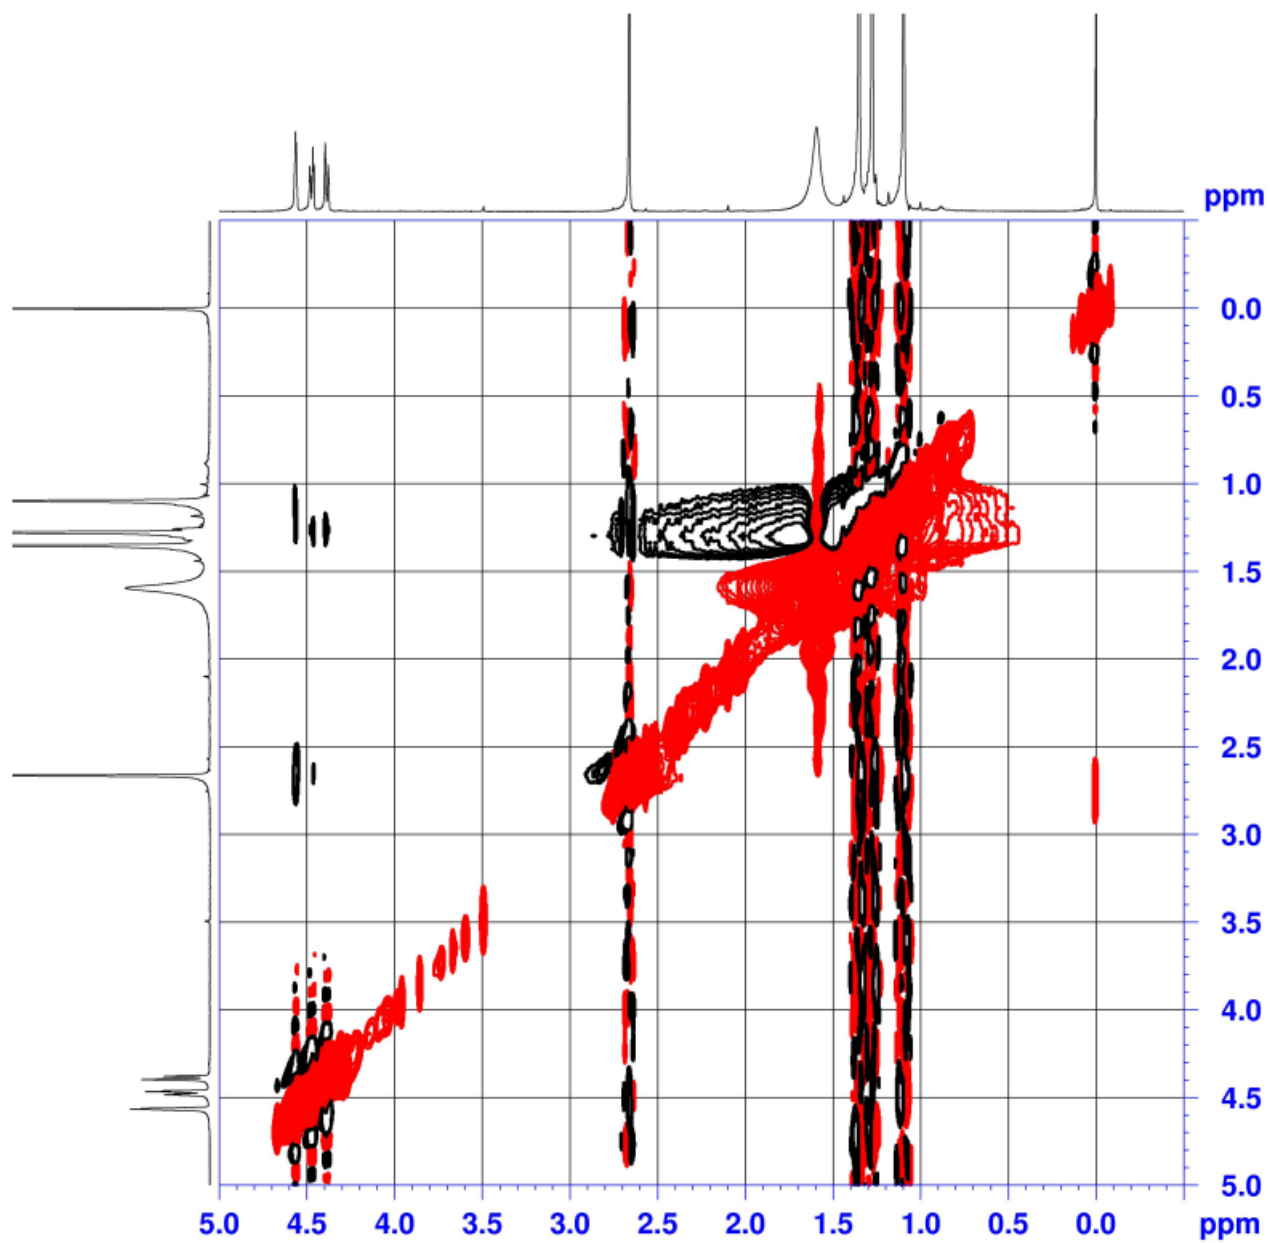

NOESY (700 MHz) spectrum of **4** in  $\text{CDCl}_3$

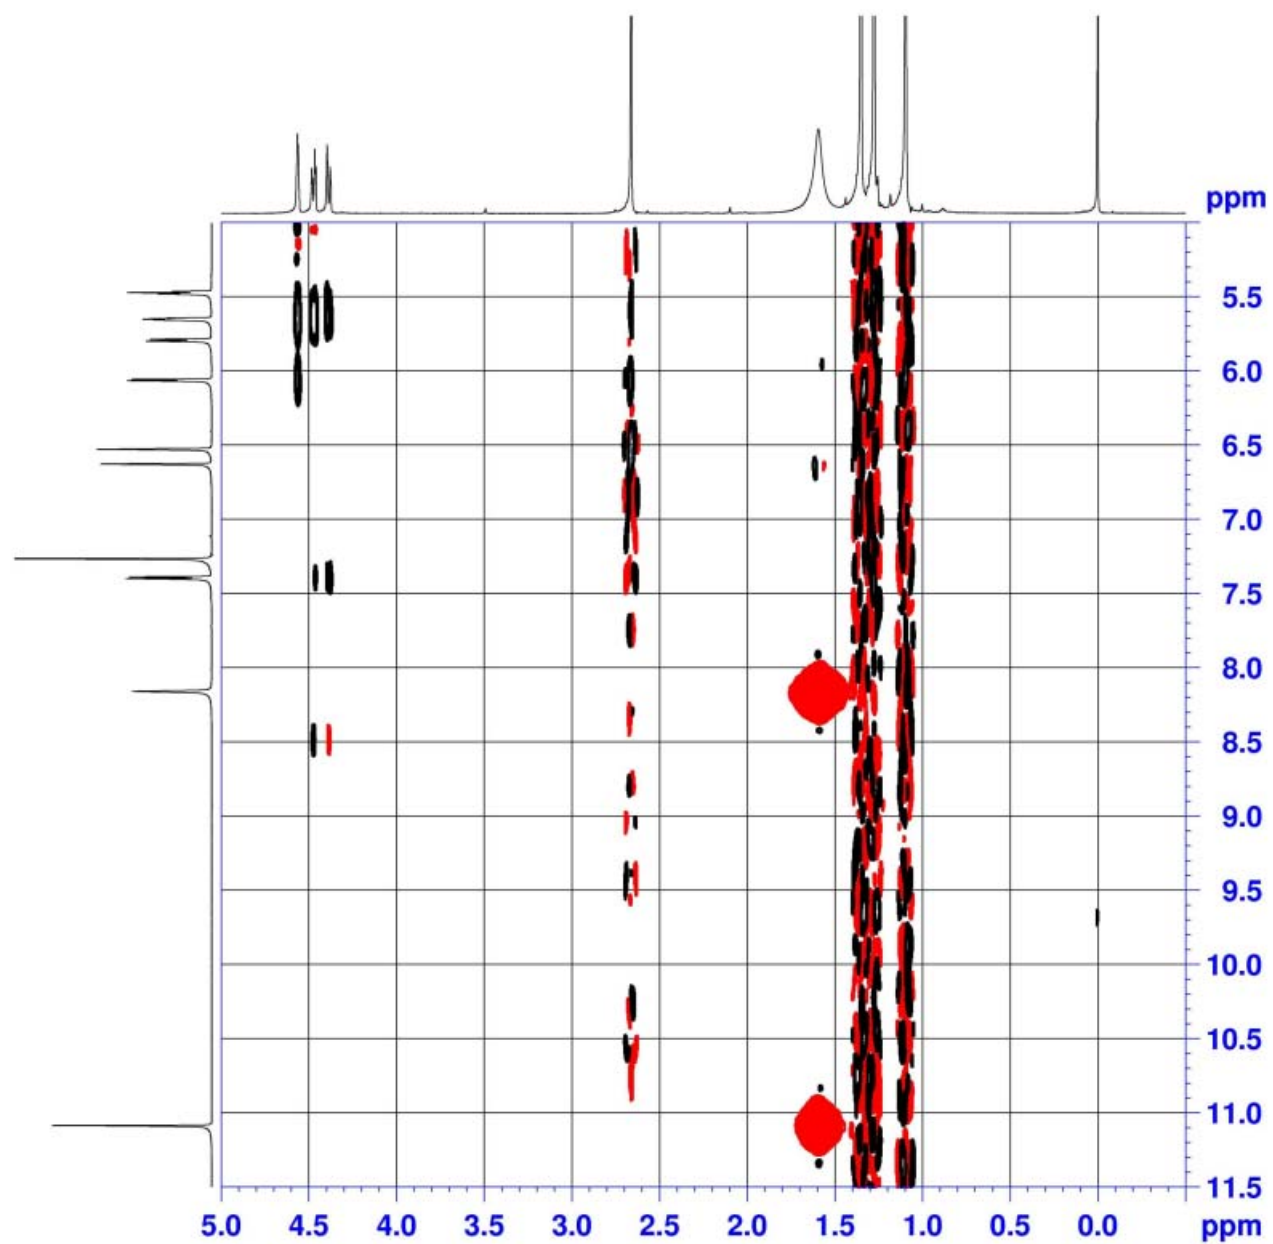

NOESY (700 MHz) spectrum of **4** in  $\text{CDCl}_3$

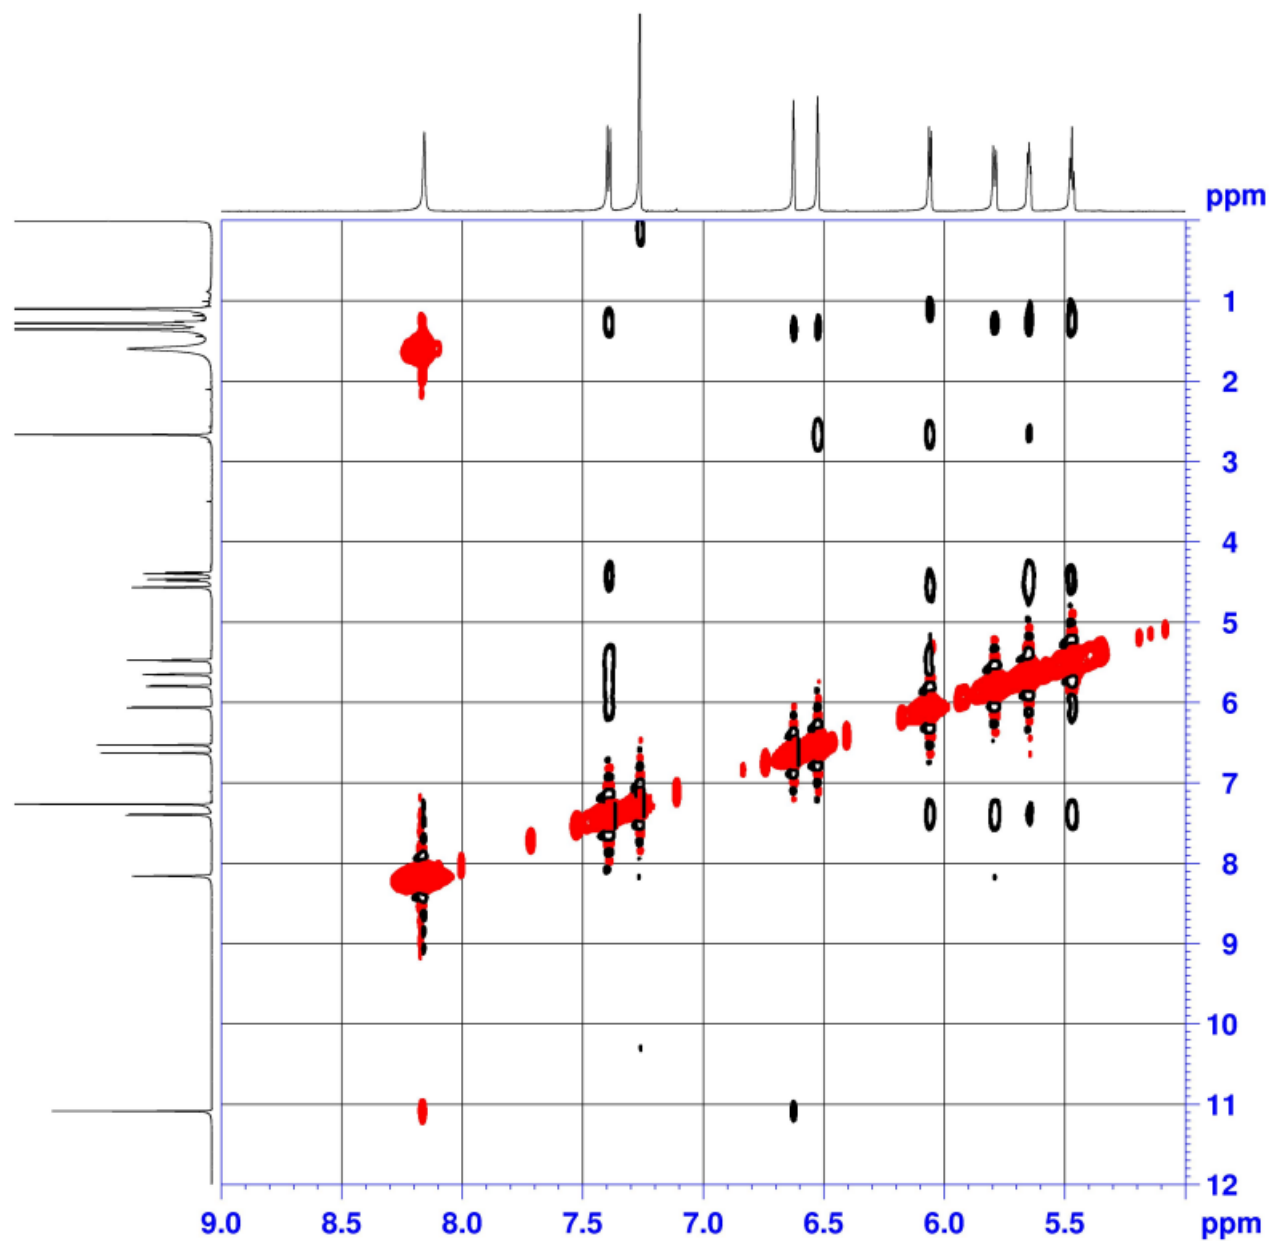

NOESY (700 MHz) spectrum of **4** in  $\text{CDCl}_3$

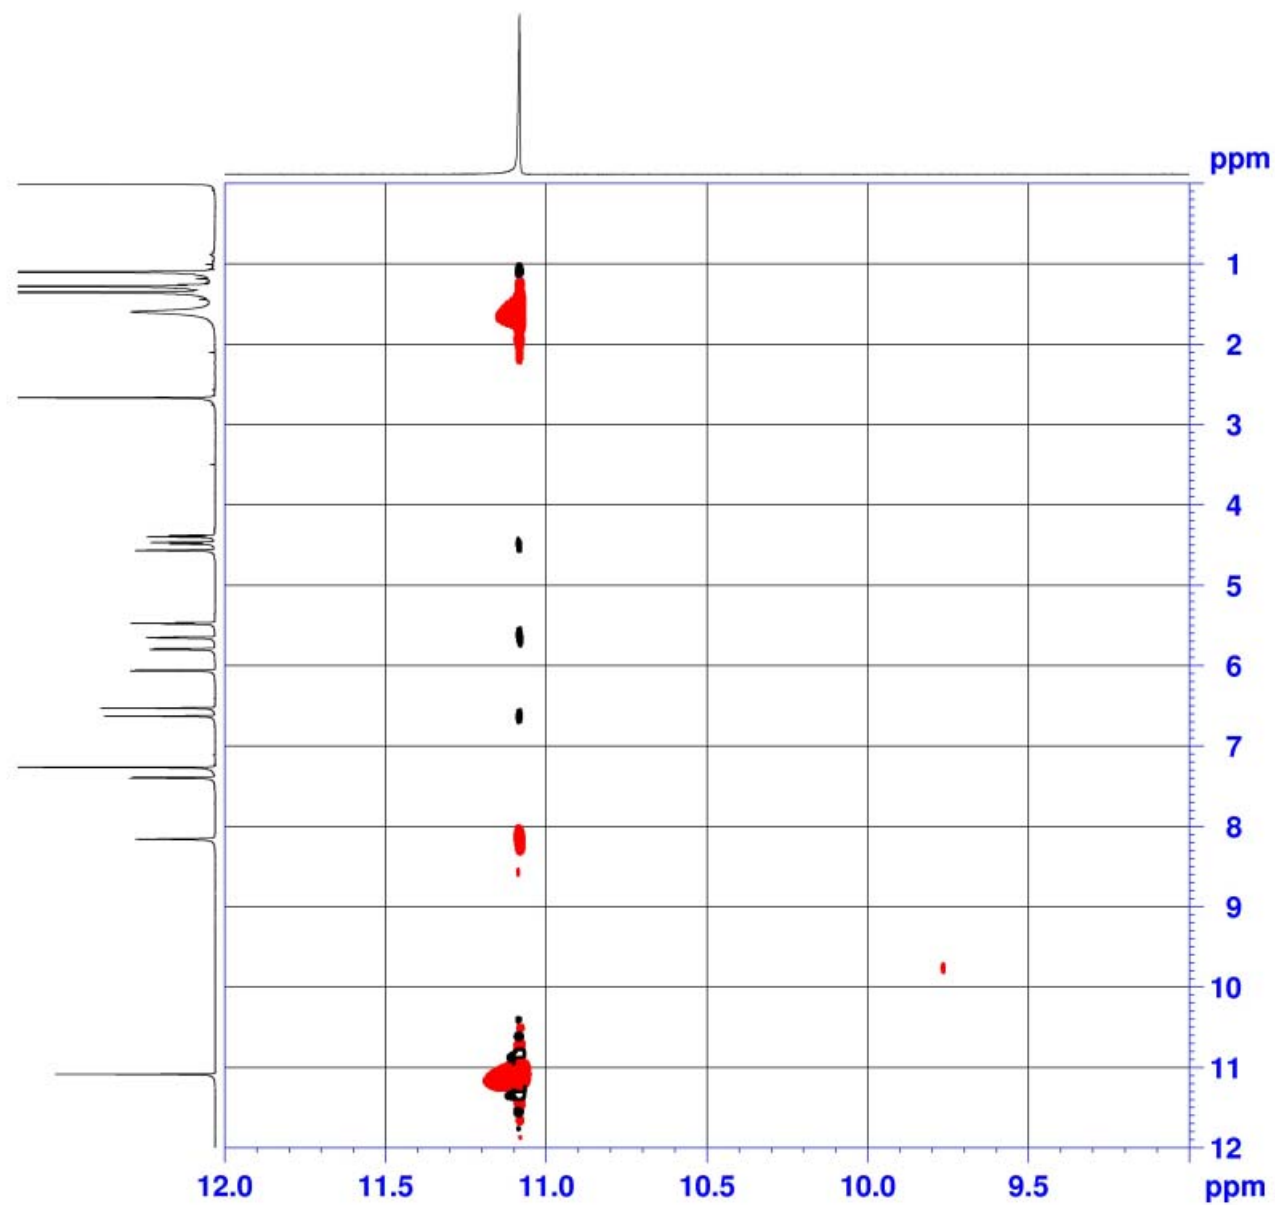

Figure S1. Energy analyses of conformers (14*S*,15*S*,17*R*)-2A to (14*S*,15*S*,17*R*)-2J

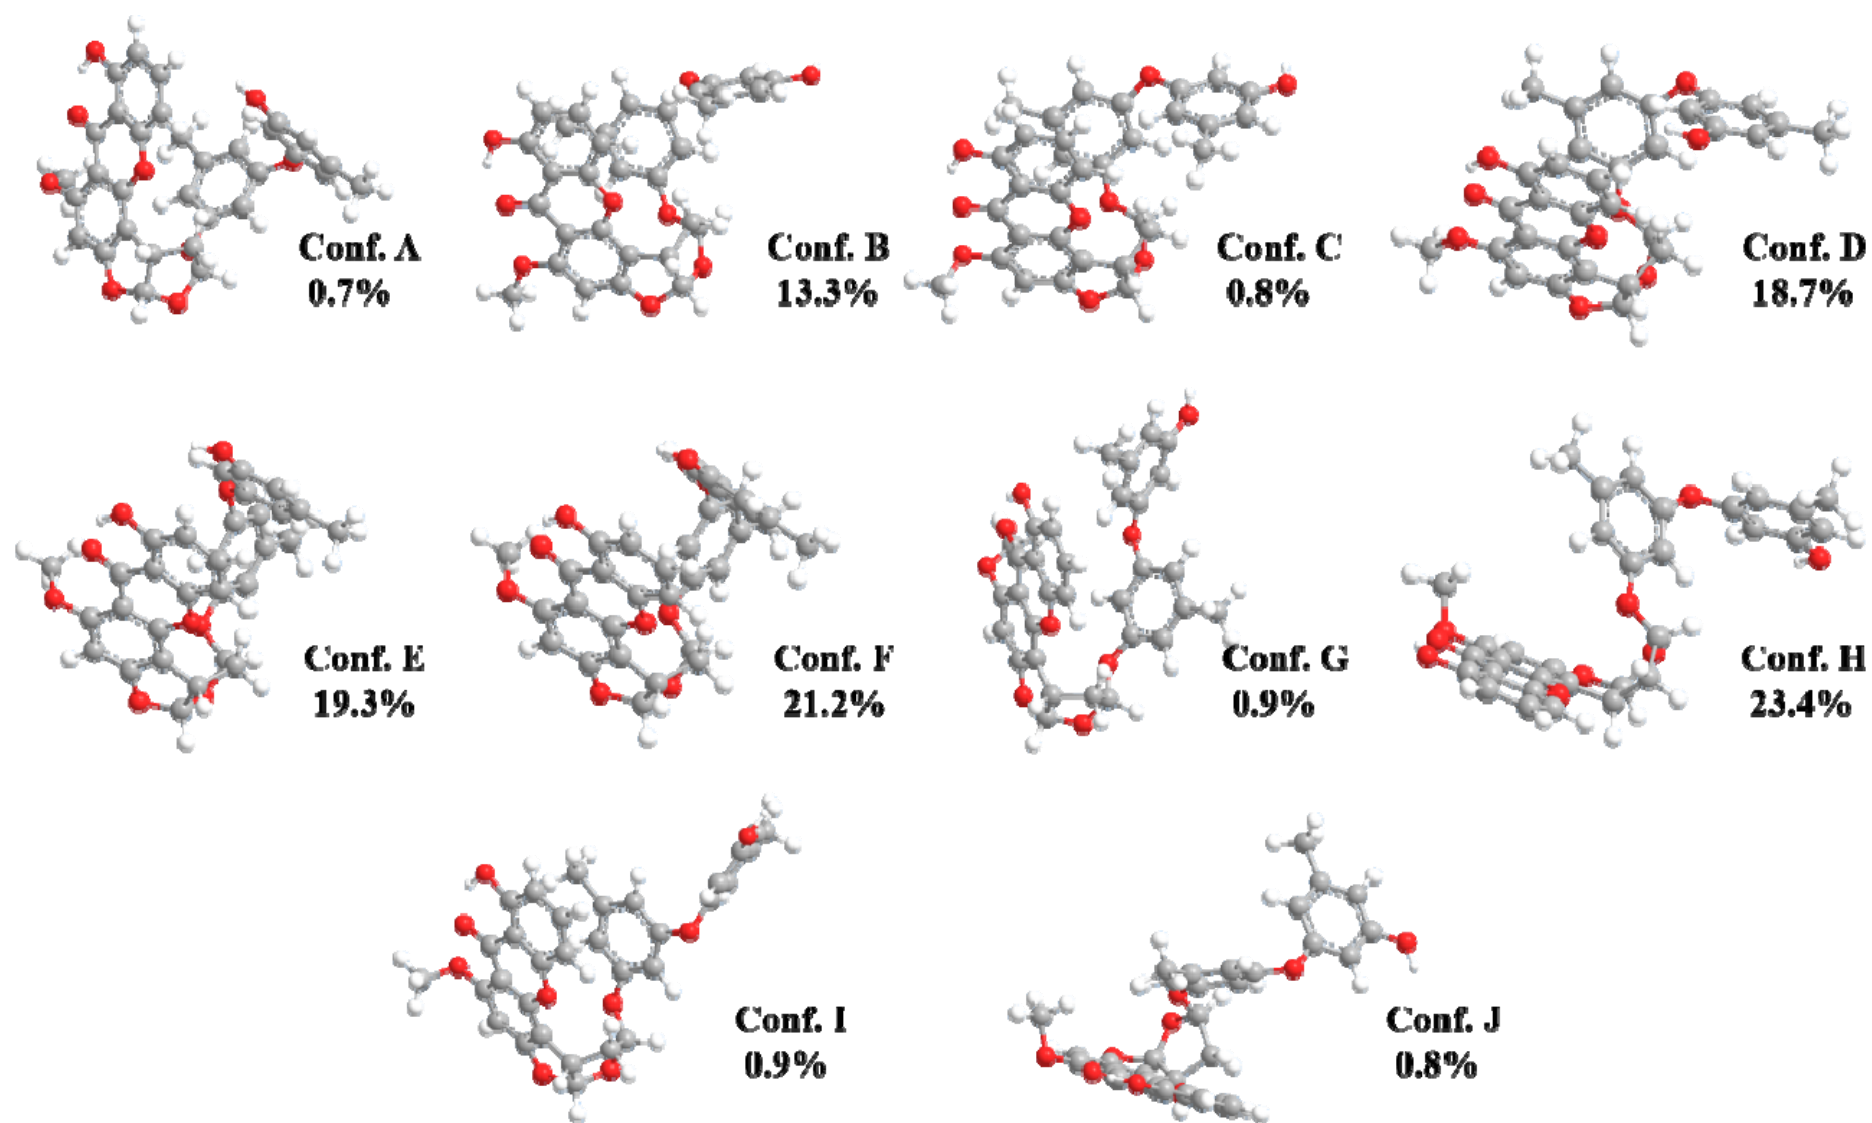



Figure S2. Energy analyses of conformers (15*R*,19*R*)-3A to (15*R*,19*R*)-3E

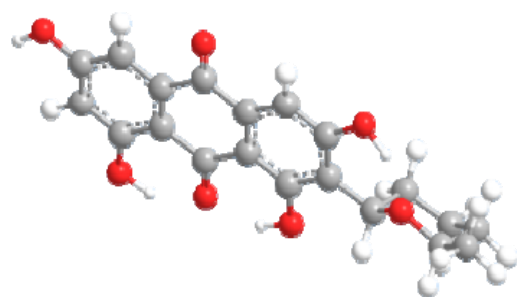

**Conf. A**  
**99.9%**

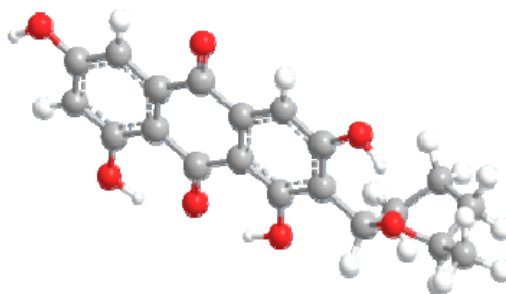

**Conf. B**  
**<0.01%**

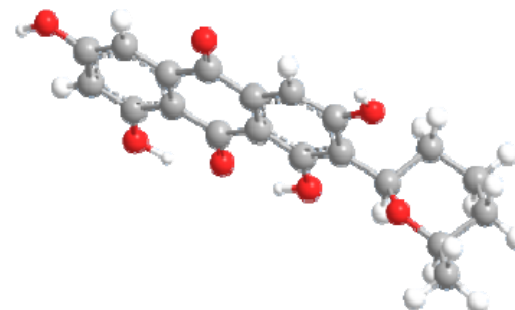

**Conf. C**  
**<0.01%**

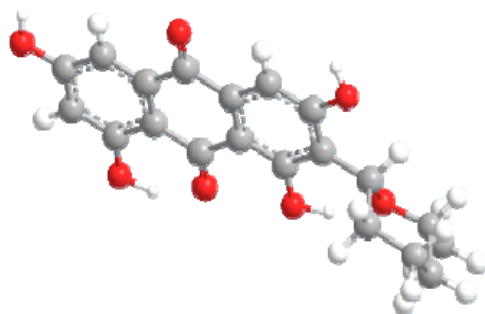

**Conf. D**  
**<0.01%**

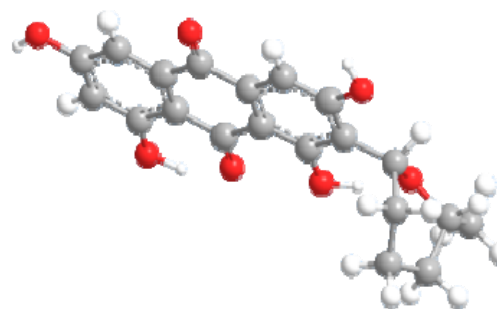

**Conf. E**  
**<0.01%**

Figure S3. The UV spectrum of **1**

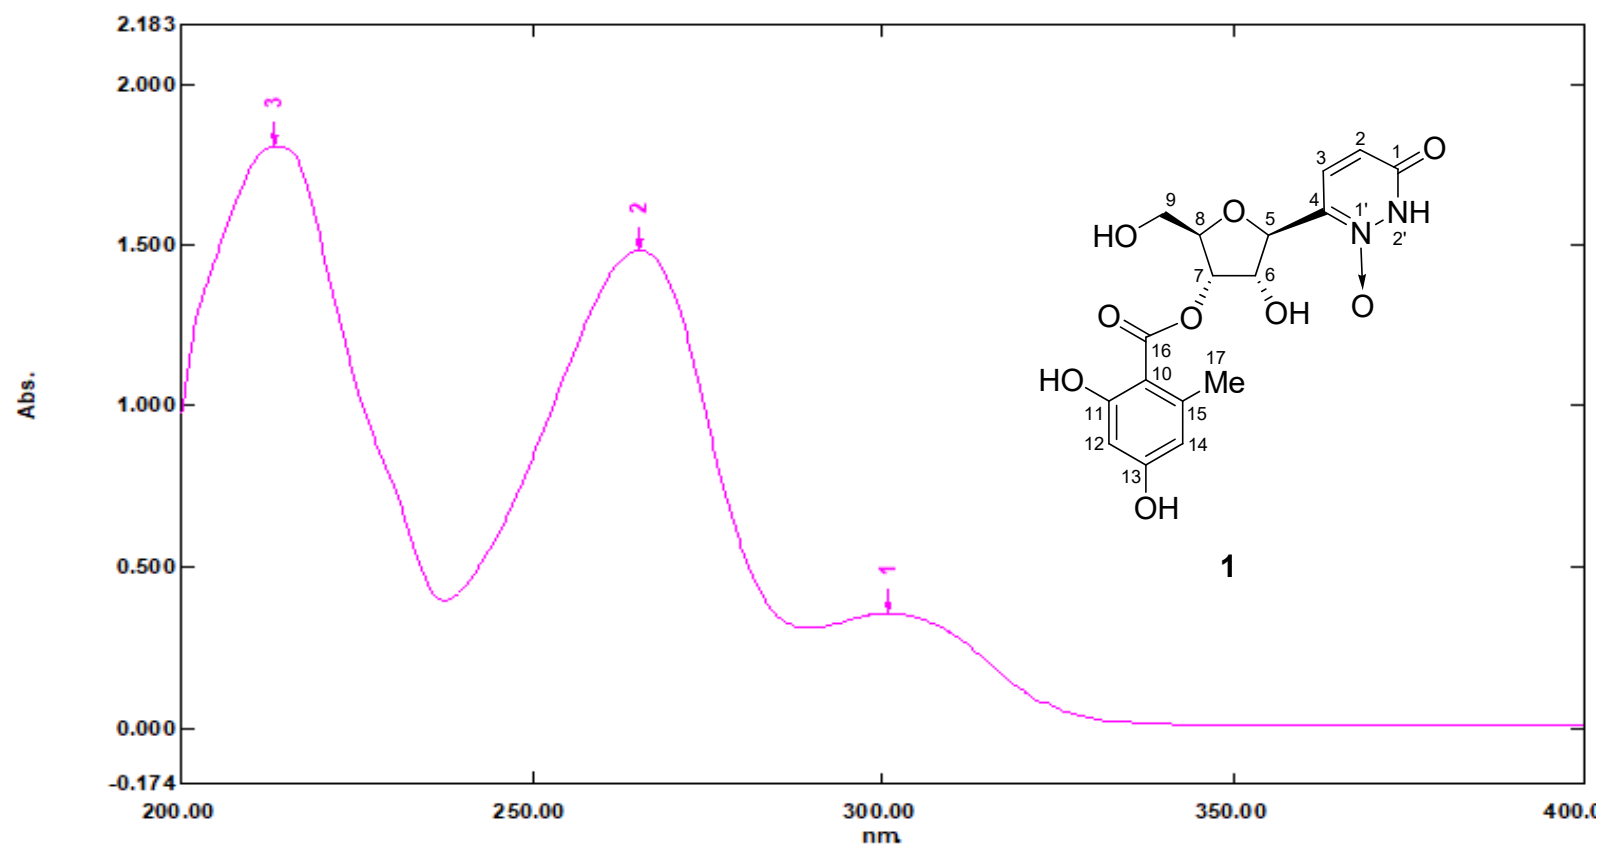

| No. | P/V wavelength (nm) | Abs.  |
|-----|---------------------|-------|
| 1   | 300.80              | 0.355 |
| 2   | 265.40              | 1.482 |
| 3   | 213.40              | 1.805 |

Figure S4. The UV spectrum of **2**

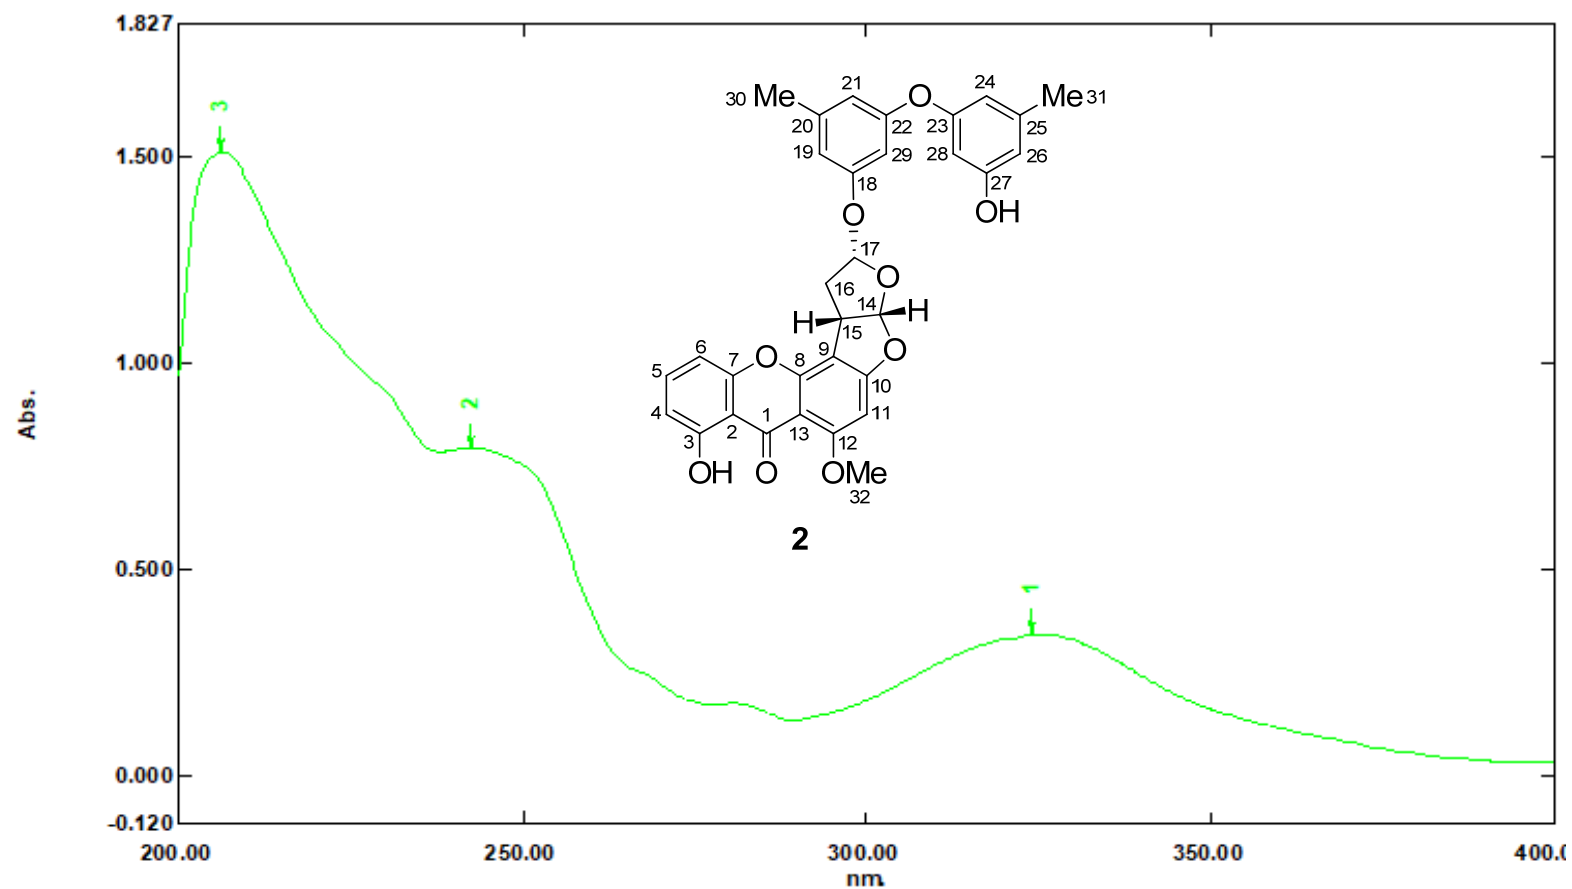

Figure S5. The UV spectrum of **3**

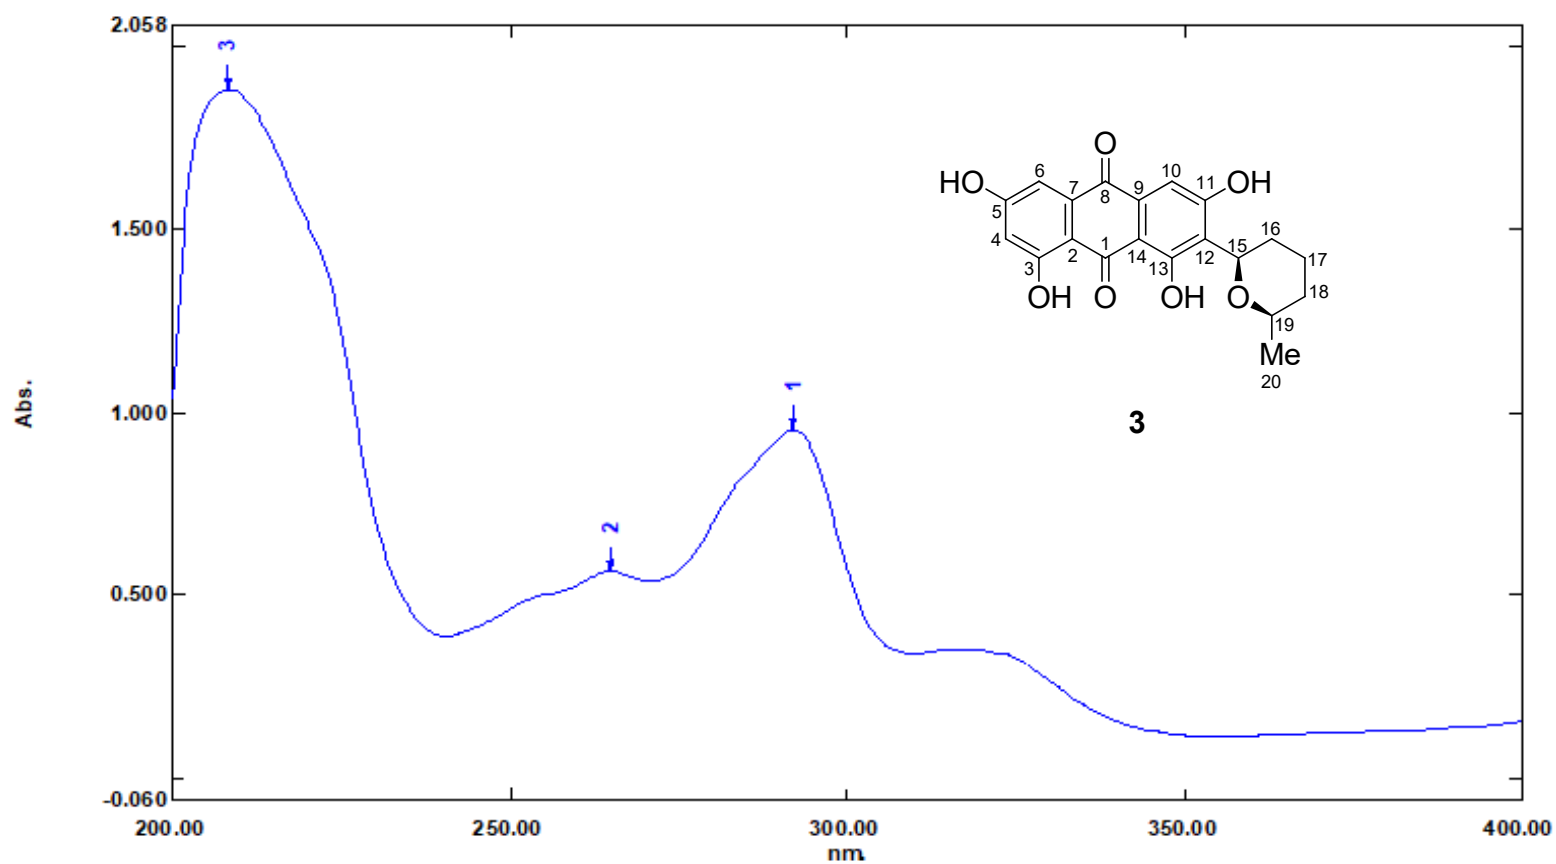

| No. | P/V wavelength (nm) | Abs.  |
|-----|---------------------|-------|
| 1   | 292.00              | 0.951 |
| 2   | 264.80              | 0.564 |
| 3   | 208.20              | 1.882 |

Figure S6. The IR spectrum of **1**

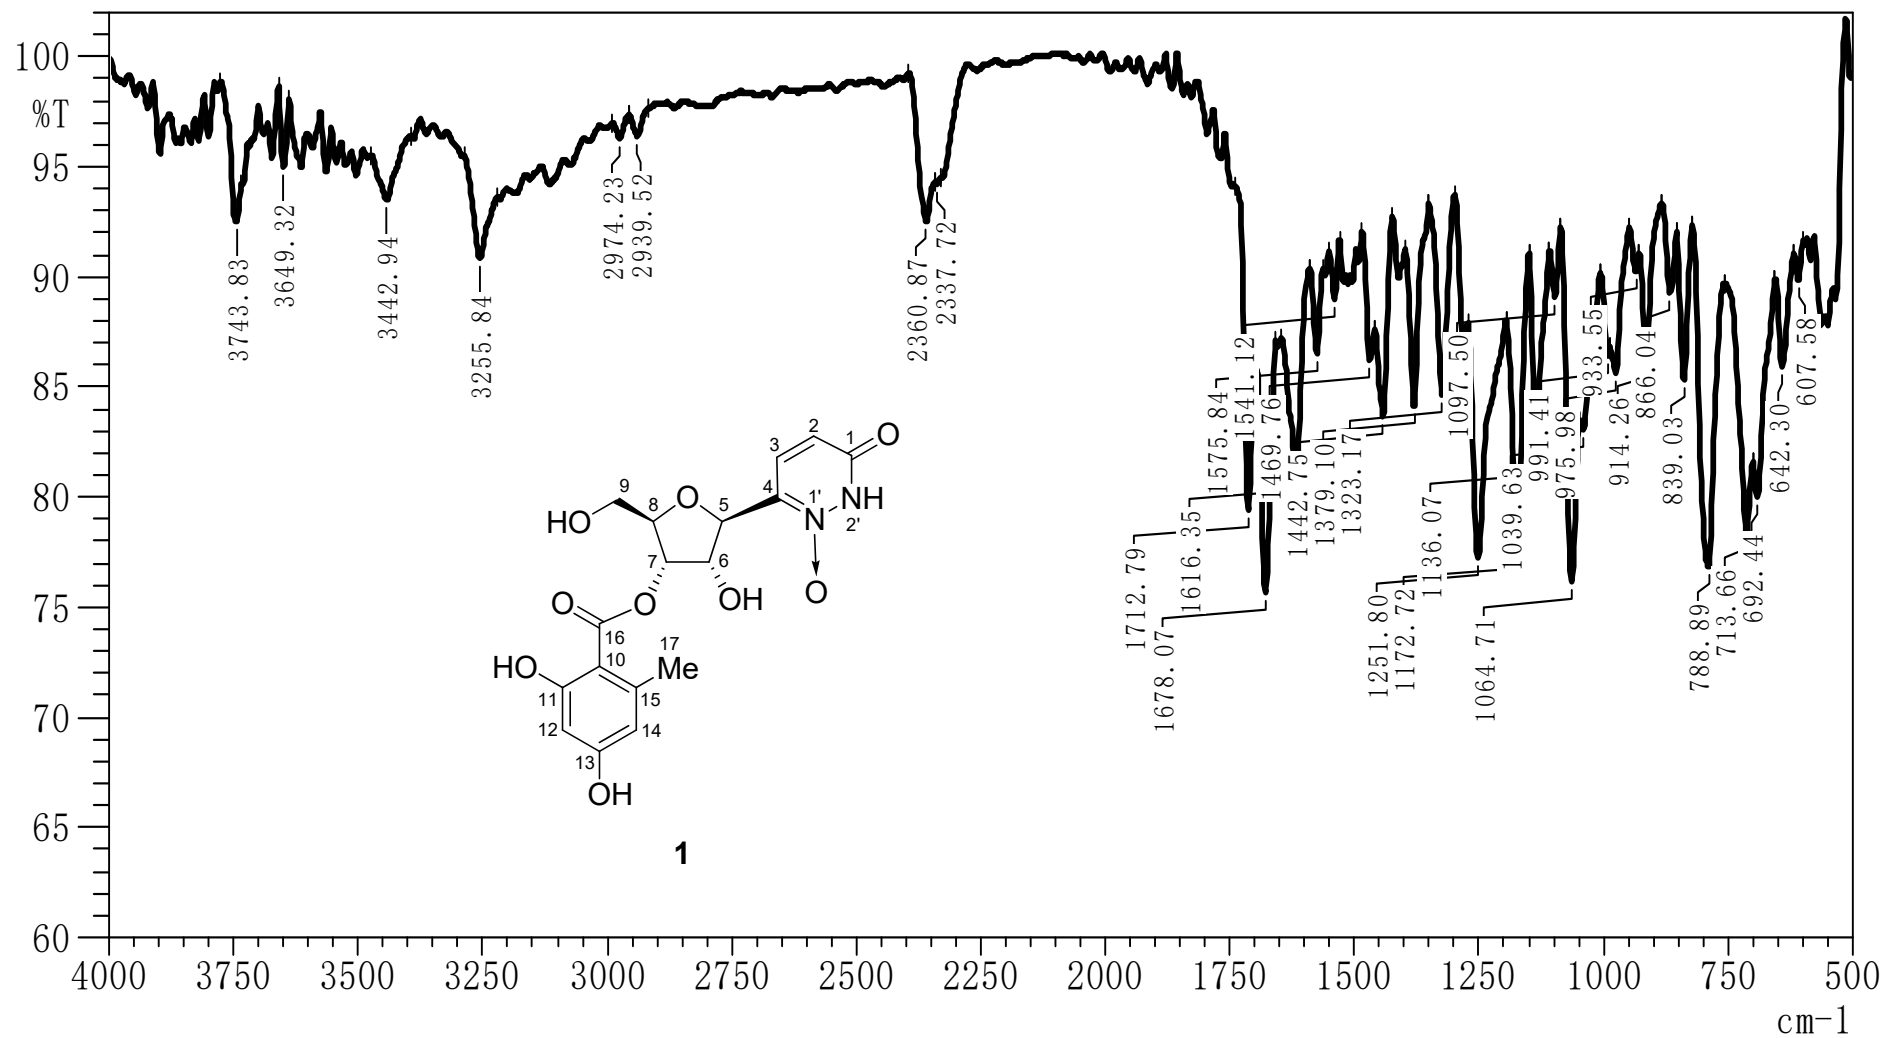

Figure S7. The IR spectrum of **2**

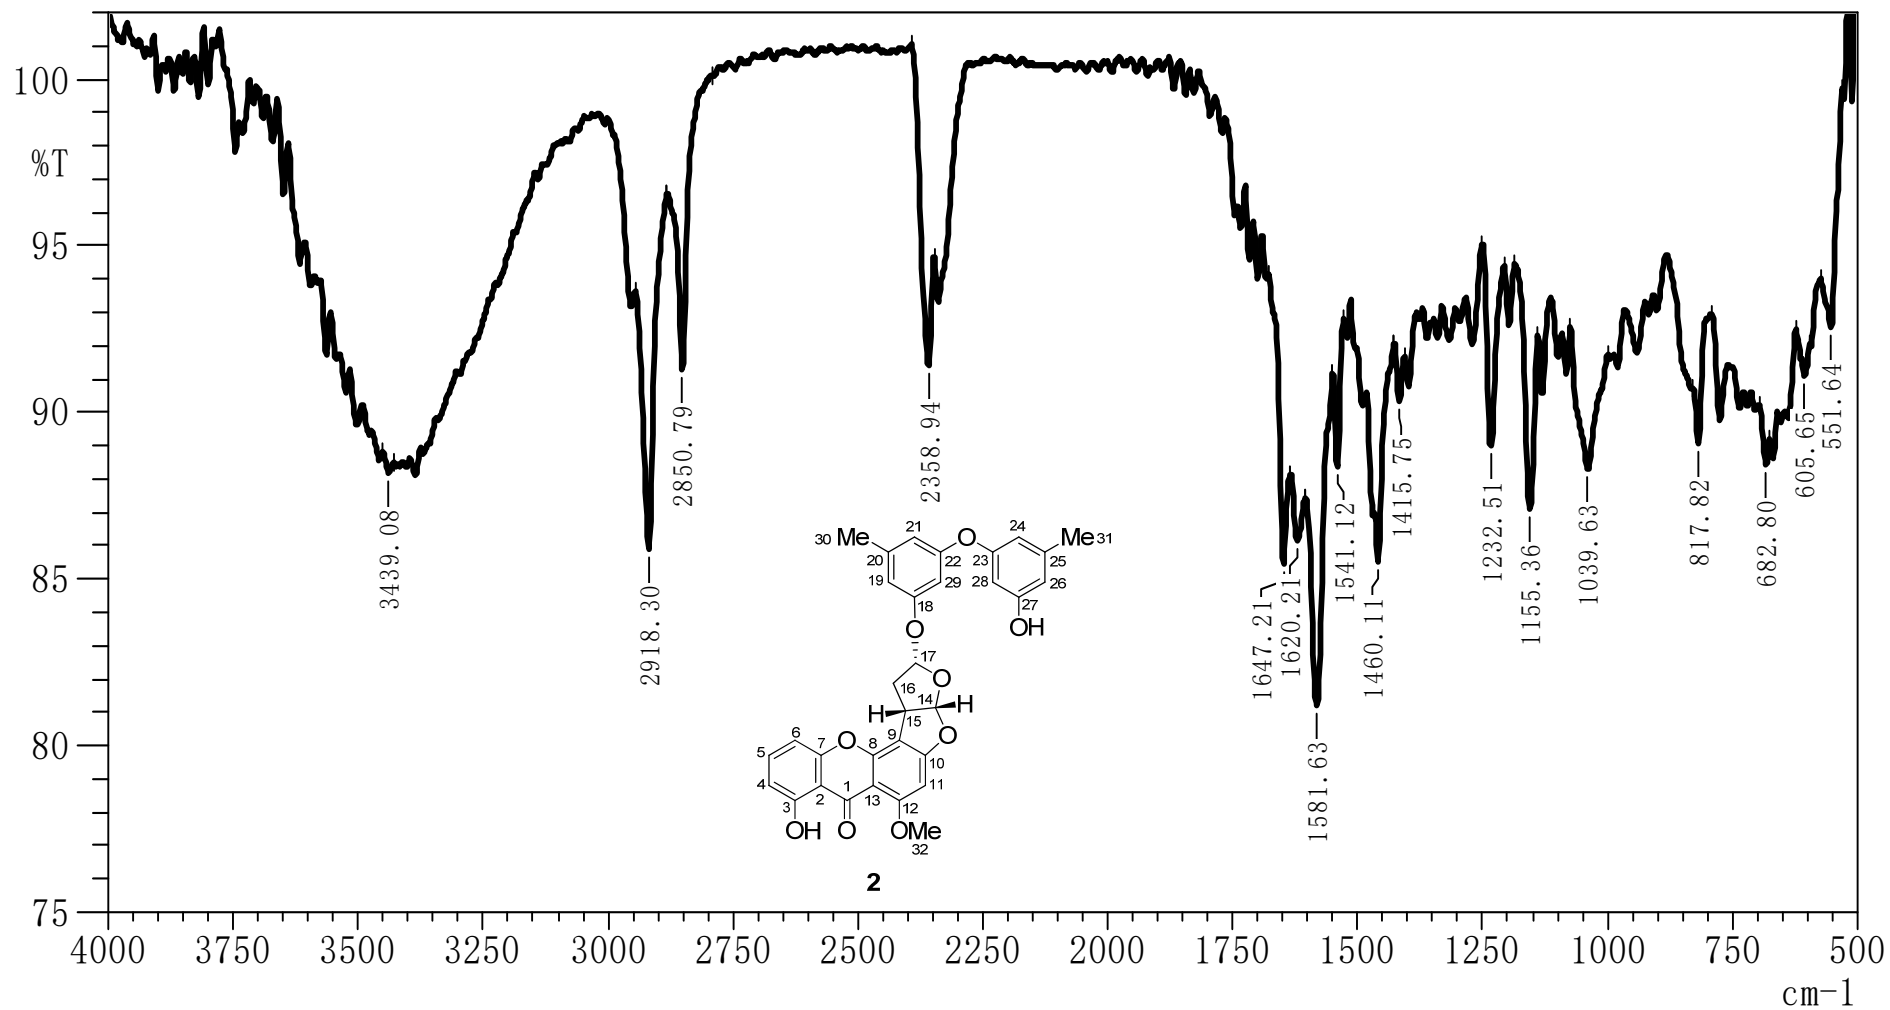

Figure S8. The IR spectrum of **3**

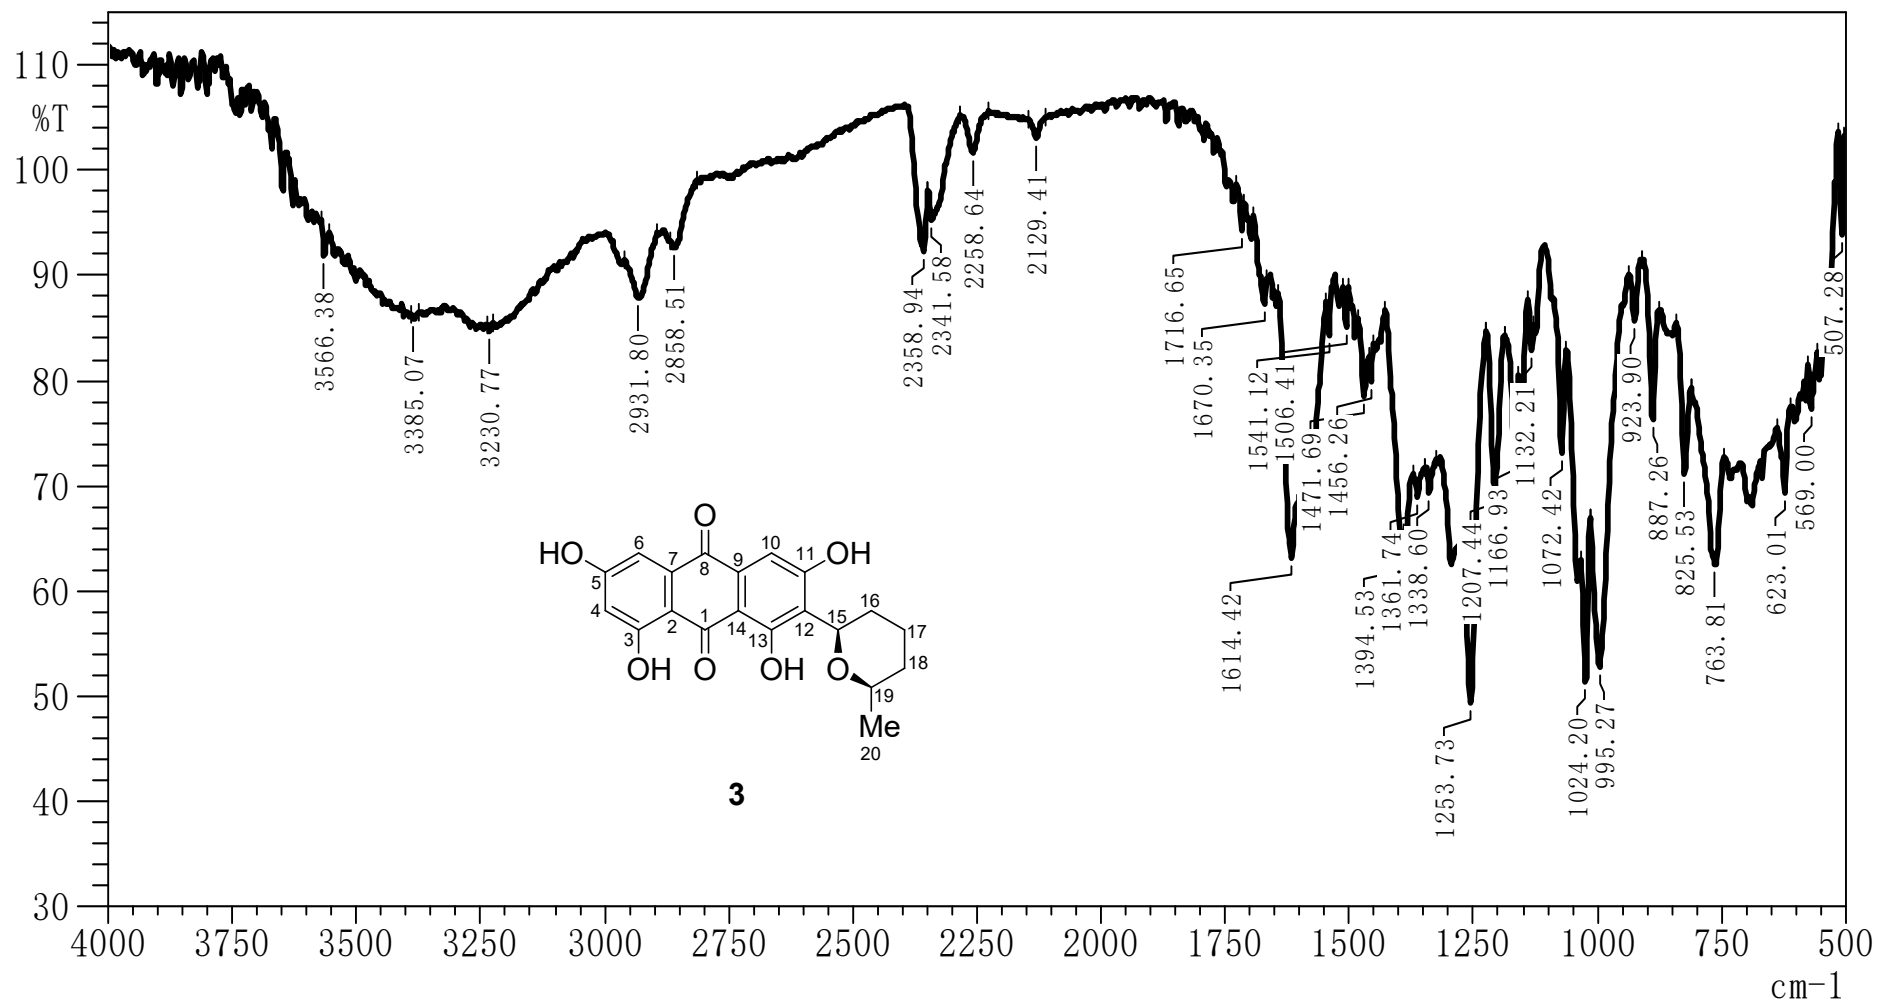

Supplement: s1 [file s1]
